# Supplementary material for: Bisguanidinium-catalyzed formation of oxygen-containing quaternary stereogenic carbon centers
Source: Royal Society of Chemistry journal article supplement (doi:10.1039/d3qo01332d), 2023-01-01
Supplement: d3qo01332d1.pdf [file d3qo01332d1.pdf]

## **Bisguanidinium-Catalysed Formation of Oxygen-Containing Quaternary Stereogenic Carbon Centres**

Xu Ban,\* Changxing Chen, Kha Tuan Khoa, Chao Wang, Zhiyong Jiang, and Choon-Hong Tan\*

### **Supporting Information**

#### **Contents**

|                                                                                |     |
|--------------------------------------------------------------------------------|-----|
| 1. General information .....                                                   | 2   |
| 2. Reaction condition optimizations.....                                       | 3   |
| 3. Procedures for the preparation of tertiary bromides .....                   | 12  |
| 4. Procedures for the preparation of hydroxylamines .....                      | 13  |
| 5. Procedure for the coupling of bromides with hydroxylamines .....            | 16  |
| 6. Procedure for the coupling of Bromides with phenol.....                     | 16  |
| 7. Procedure for the synthesis of Bicalutamid .....                            | 17  |
| 8. Procedure for the synthesis of fabrate .....                                | 19  |
| 9. Characterization of the substrates and products.....                        | 20  |
| 10. Characterization of the products .....                                     | 26  |
| 11. Determination of the Absolute Configuration by X-ray Crystallography ..... | 38  |
| 13. HPLC charts .....                                                          | 101 |
| 14. References.....                                                            | 133 |

## 1. General information

THF were distilled over sodium/benzophenone under N<sub>2</sub> atmosphere. Toluene, Acetonitrile and Dichloromethane were distilled over CaH<sub>2</sub> under N<sub>2</sub> atmosphere. Commercially available materials and other solvents purchased from commercial suppliers were used as received. <sup>1</sup>H and <sup>13</sup>C NMR spectra were recorded on Bruker AV-300 (300 MHz), Bruker Avance III 400 (400MHz) (100 MHz) and JEOL ECA400 NMR spectrometer. Chemical shifts are recorded as δ in units of parts per million (ppm). High resolution mass spectra (HRMS) were obtained on the Q-Tof Premier mass spectrometer (Waters Corporation). HRMS were reported in units of mass of charge ratio (*m/z*). Enantiomeric excess values were determined by HPLC analysis on Shimadzu LC-20AT and LC-2010CHT HPLC workstations. Optical rotations were measured in CHCl<sub>3</sub> using a 1 mL cell with a 1 cm path length on a Jasco P-1030 polarimeter with a sodium lamp of wavelength 589 nm and reported as follows: [α]<sub>D</sub><sup>25</sup> (*c* = g/100 mL, solvent). X-ray crystallography analysis was performed on Bruker X8 APEX X-ray diffractionmeter. Flash chromatography separations were performed on Merck 60 (0.040 - 0.063mm) mesh silica gel. Analytical thin-layer chromatography (TLC) was performed on Merck 60 F254 silica gel plates. Visualization was performed using a UV lamp or potassium permanganate stain. Experiments involving moisture and/or air sensitive components were performed under a positive pressure of nitrogen in oven-dried glassware equipped with a rubber septum inlet. All compounds synthesized were stored in a -30 °C freezer.

## 2. Reaction condition optimizations

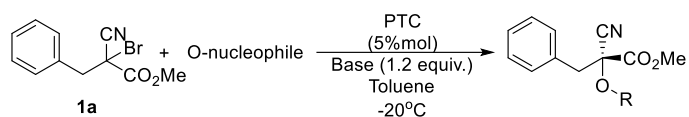

**Table S1** Screening of O-nucleophiles (alkyl oxide salts)

| Entry | O-nucleophiles | PTC        | Result             |
|-------|----------------|------------|--------------------|
| 1     | MeONa          | <b>BG1</b> | Mess reaction      |
| 2     | EtONa          | <b>BG1</b> | Mess reaction      |
| 3     | tBuOK          | <b>BG1</b> | Mess reaction      |
| 4     | AcONa          | <b>BG1</b> | Mess reaction      |
| 5     | TsOK           | <b>BG1</b> | No product         |
| 6     | PhthOK         | <b>PN1</b> | 62% yield<br>8% ee |

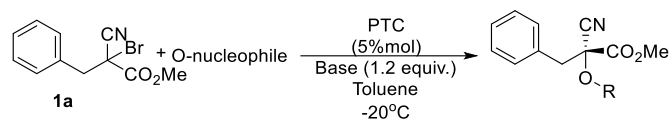

**Table S2** Screening of O-nucleophiles (N-hydroxyphthalimide with an inorganic base)

| Entry | O-nucleophiles | Base                           | PTC | Result              |
|-------|----------------|--------------------------------|-----|---------------------|
| 1     |                | K <sub>2</sub> CO <sub>3</sub> | PN1 | 68% yield<br>12% ee |
| 2     |                | K <sub>2</sub> CO <sub>3</sub> | PN1 | 59% yield<br>10% ee |
| 3     |                | K <sub>2</sub> CO <sub>3</sub> | PN1 | 52% yield<br>11% ee |
| 4     |                | K <sub>2</sub> CO <sub>3</sub> | PN1 | 55% yield<br>8% ee  |
| 5     |                | K <sub>2</sub> CO <sub>3</sub> | PN1 | 52% yield<br>13% ee |
| 6     |                | K <sub>2</sub> CO <sub>3</sub> | PN1 | 62% yield<br>10% ee |
| 7     |                | K <sub>2</sub> CO <sub>3</sub> | PN1 | 42% yield<br>7% ee  |

|    |                                                                                     |                                |     |                     |
|----|-------------------------------------------------------------------------------------|--------------------------------|-----|---------------------|
| 8  | 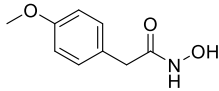   | K <sub>2</sub> CO <sub>3</sub> | PN1 | 30% yield<br>12% ee |
| 9  |    | K <sub>2</sub> CO <sub>3</sub> | PN1 | 48% yield<br>11% ee |
| 10 |    | K <sub>2</sub> CO <sub>3</sub> | PN3 | 62% yield<br>0 ee   |
| 11 |    | K <sub>2</sub> CO <sub>3</sub> | PN3 | 70% yield<br>0 ee   |
| 12 |   | K <sub>2</sub> CO <sub>3</sub> | PN3 | 21% yield<br>10% ee |
| 13 |  | K <sub>2</sub> CO <sub>3</sub> | PN3 | 30% yield<br>9% ee  |
| 14 |  | K <sub>2</sub> CO <sub>3</sub> | PN3 | 57% yield<br>6% ee  |
| 15 |  | K <sub>2</sub> CO <sub>3</sub> | PN3 | 54% yield<br>15% ee |
| 16 |  | K <sub>2</sub> CO <sub>3</sub> | PN3 | 68% yield<br>13% ee |
| 17 |  | K <sub>2</sub> CO <sub>3</sub> | PN3 | 70% yield           |

|    |                                                                                   |           |     |                     |
|----|-----------------------------------------------------------------------------------|-----------|-----|---------------------|
|    |                                                                                   |           |     | 15% ee              |
| 18 | 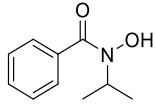 | $K_2CO_3$ | PN3 | No desired product  |
| 19 |  | $K_2CO_3$ | PN3 | 70% yield<br>13% ee |
| 20 |  | $K_2CO_3$ | PN3 | 78% yield<br>15% ee |

---

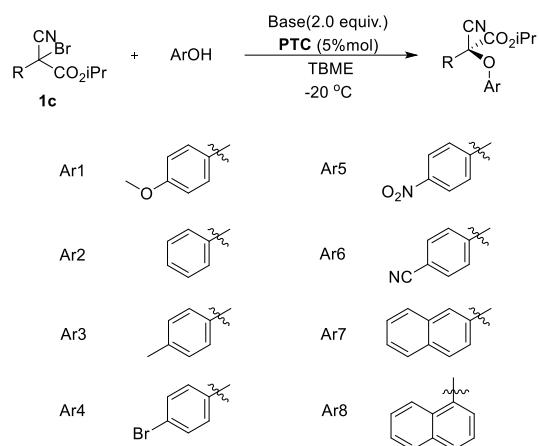

**Table S3** Optimizations of Phenols as O-nucleophiles

| Entry          | 1  | Ar   | Base                            | PTC        | Result              |
|----------------|----|------|---------------------------------|------------|---------------------|
| 1              | 1a | Ar-1 | K <sub>2</sub> CO <sub>3</sub>  | <b>BG3</b> | Elimination product |
| 2              | 1j | Ar-1 | K <sub>2</sub> CO <sub>3</sub>  | <b>BG3</b> | 85% yield<br>62% ee |
| 3              | 1j | Ar-1 | K <sub>3</sub> PO <sub>4</sub>  | <b>BG3</b> | 83% yield<br>59% ee |
| 4              | 1j | Ar-1 | Cs <sub>2</sub> CO <sub>3</sub> | <b>BG3</b> | 88% yield<br>70% ee |
| 5 <sup>a</sup> | 1j | Ar-1 | -                               | <b>BG3</b> | 90% yield<br>72% ee |
| 6              | 1j | Ar-1 | KOH(aq)                         | <b>BG3</b> | 91% yield<br>73% ee |

|                       |    |      |         |            |                        |
|-----------------------|----|------|---------|------------|------------------------|
| <b>7<sup>b</sup></b>  | lj | Ar-1 | KOH(aq) | <b>BG3</b> | 82% yield<br>90% ee    |
| <b>8<sup>b</sup></b>  | lj | Ar-2 | KOH(aq) | <b>BG3</b> | 90% yield<br>82% ee    |
| <b>9<sup>b</sup></b>  | lj | Ar-3 | KOH(aq) | <b>BG3</b> | 88% yield<br>89% ee    |
| <b>10<sup>b</sup></b> | lj | Ar-4 | KOH(aq) | <b>BG3</b> | 52% yield<br>13% ee    |
| <b>11<sup>b</sup></b> | lj | Ar-5 | KOH(aq) | <b>BG3</b> | Trace<br>-             |
| <b>12<sup>b</sup></b> | lj | Ar-6 | KOH(aq) | <b>BG3</b> | 77% yield<br>15% ee    |
| <b>13<sup>b</sup></b> | lj | Ar-7 | KOH(aq) | <b>BG3</b> | Protonation<br>product |
| <b>14<sup>b</sup></b> | lj | Ar-8 | KOH(aq) | <b>BG3</b> | Protonation<br>product |

<sup>a</sup> Used potassium 4-methoxyphenolate as nucleophile, no base. <sup>b</sup> Reactions were performed at -60°C



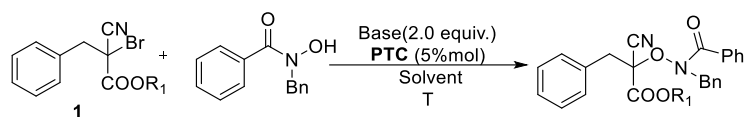

**Table S4** Optimization of reaction conditions

| Entry | R1 | Base                            | PTC | Solvent | T     | Result              |
|-------|----|---------------------------------|-----|---------|-------|---------------------|
| 1     | Me | Na <sub>2</sub> CO <sub>3</sub> | PN3 | Toluene | -20°C | No reaction         |
| 2     | Me | K <sub>2</sub> CO <sub>3</sub>  | PN3 | Toluene | -20°C | 75% yield<br>6% ee  |
| 3     | Me | K <sub>3</sub> PO <sub>4</sub>  | PN3 | Toluene | -20°C | trace               |
| 4     | Me | Cs <sub>2</sub> CO <sub>3</sub> | PN3 | Toluene | -20°C | 80% yield<br>7% ee  |
| 5     | Me | KOH(aq)                         | PN3 | Toluene | -20°C | 82% yield<br>5% ee  |
| 6     | Me | Cs <sub>2</sub> CO <sub>3</sub> | PN1 | Toluene | -20°C | 78% yield<br>17% ee |
| 7     | Me | Cs <sub>2</sub> CO <sub>3</sub> | BG1 | Toluene | -20°C | 88% yield<br>21% ee |
| 8     | Me | Cs <sub>2</sub> CO <sub>3</sub> | BG2 | Toluene | -20°C | 85% yield<br>24% ee |
| 9     | Me | Cs <sub>2</sub> CO <sub>3</sub> | BG3 | Toluene | -20°C | 91% yield           |

|           |             |                                 |            |                   |       |                     |
|-----------|-------------|---------------------------------|------------|-------------------|-------|---------------------|
|           |             |                                 |            |                   |       | 31% ee              |
| <b>10</b> | Me          | Cs <sub>2</sub> CO <sub>3</sub> | <b>BG3</b> | EA                | -20°C | 95% yield<br>30% ee |
| <b>11</b> | Me          | Cs <sub>2</sub> CO <sub>3</sub> | <b>BG3</b> | DCM               | -20°C | 87% yield<br>27% ee |
| <b>12</b> | Me          | Cs <sub>2</sub> CO <sub>3</sub> | <b>BG3</b> | Hexane            | -20°C | trace               |
| <b>13</b> | Me          | Cs <sub>2</sub> CO <sub>3</sub> | <b>BG3</b> | Et <sub>2</sub> O | -20°C | 89% yield<br>62% ee |
| <b>14</b> | Me          | Cs <sub>2</sub> CO <sub>3</sub> | <b>BG3</b> | TBME              | -20°C | 93% yield<br>65% ee |
| <b>15</b> | Et          | Cs <sub>2</sub> CO <sub>3</sub> | <b>BG3</b> | TBME              | -20°C | 91% yield<br>71% ee |
| <b>16</b> | <i>i</i> Pr | Cs <sub>2</sub> CO <sub>3</sub> | <b>BG3</b> | TBME              | -20°C | 80% yield<br>77% ee |
| <b>17</b> | <i>t</i> Bu | Cs <sub>2</sub> CO <sub>3</sub> | <b>BG3</b> | TBME              | -20°C | 82% yield<br>62% ee |
| <b>18</b> | Bn          | Cs <sub>2</sub> CO <sub>3</sub> | <b>BG3</b> | TBME              | -20°C | 75% yield<br>71% ee |
| <b>19</b> | <i>i</i> Pr | Cs <sub>2</sub> CO <sub>3</sub> | <b>BG3</b> | TBME              | -40°C | 85% yield           |

|           |             |                                 |            |      |       |           |
|-----------|-------------|---------------------------------|------------|------|-------|-----------|
|           |             |                                 |            |      |       | 90% ee    |
| <b>20</b> | <i>i</i> Pr | Cs <sub>2</sub> CO <sub>3</sub> | <b>BG3</b> | TBME | -60°C | 78% yield |
|           |             |                                 |            |      |       | 77% ee    |

---

### 3. Procedures for the preparation of tertiary bromides <sup>[1]</sup>

#### Method A

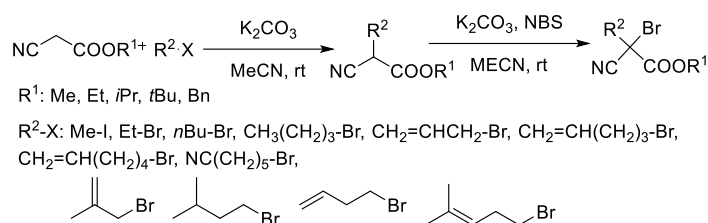

**Step 1:** Potassium carbonate (1.2 equiv.) was added to a solution of cyanoester (3 equiv.) in MeCN (20 mL). After stirring for 30 min, R<sup>2</sup>-X (1.0 equiv.) was added to the mixture dropwise. The mixture was stirred at rt for 4 h, TLC monitored the reaction (KMnO<sub>4</sub> as the indicator) until the starting material was totally consumed. Brine (15mL) was added to the mixture and then extracted with EA (3 X 20 mL), The combined organic layer was dried by Na<sub>2</sub>SO<sub>4</sub>, Solvent was removed under reduced pressure and the alkylated cyanoester was obtained by flash chromatography.

**Step 2:** To the mixture of NBS (1.8 equiv.) and K<sub>2</sub>CO<sub>3</sub> (1.5 equiv.) in MeCN (20 mL) was added the alkylated cyanoester dropwise. After stirring for 2 h, TLC monitored the process (KMnO<sub>4</sub> as the indicator). Brine (15mL) was added to the mixture and then extracted with EA (3 X 20 mL), The combined organic layer was dried by Na<sub>2</sub>SO<sub>4</sub>, Solvent was removed under reduced pressure, the residue was purified by flash chromatography to get the brominated cyanoester, which is very unstable, should be kept in -20 °C fridge.

#### Method B

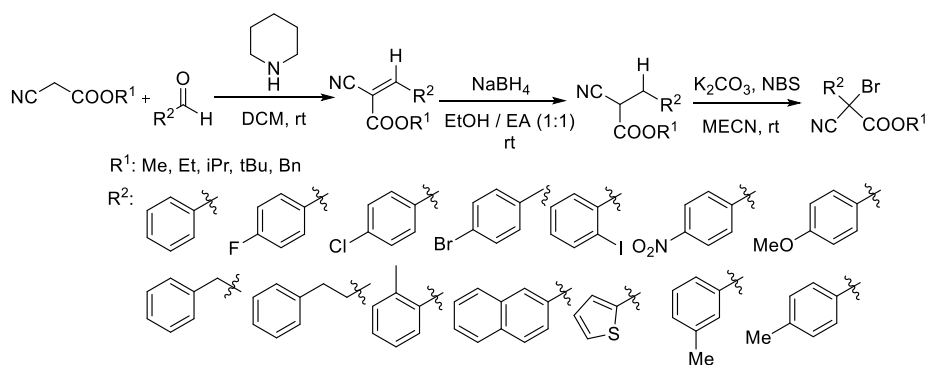

**Step 1:** To a mixture of cyanoester (1.0 equiv.) and aldehyde (1.1 equiv.) in DCM (20 mL) was added piperidine (0.1 equiv.) dropwise. After stirring for 3-4 h, TLC monitored the reaction (KMnO<sub>4</sub> as the indicator) until the starting material was totally consumed. Solvent was removed under vacuum. The obtained residue was taken into 40 mL Et<sub>2</sub>O, stand in refrigerator for 2 hrs. Then solid was precipitated, filtered and dried to give the olefin.

**Step 2:** NaBH<sub>4</sub> (0.25 equiv.) was added in portions to a stirred solution of the olefin (1 equiv.) in EtOH/EA (1:1, 20 mL) at room temperature. After stirring for 30 min, TLC analysis showed the complete consumption of the olefin, the reaction mixture was quenched by water, washed with EA (3 X 20 mL), The combined organic layer was dried by Na<sub>2</sub>SO<sub>4</sub>, Solvent was removed under reduced pressure and the alkylated cyanoester was obtained by flash chromatography.

**Step 3:** To the mixture of NBS (1.8 equiv.) and K<sub>2</sub>CO<sub>3</sub> (1.5 equiv.) in MeCN (20 mL) was added the alkylated cyanoester dropwise. After stirring for 2 h, TLC monitored the process (KMnO<sub>4</sub> as the indicator). Brine (15mL) was added to the mixture and then extracted with EA (3 X 20 mL), The combined organic layer was dried by Na<sub>2</sub>SO<sub>4</sub>, Solvent was removed under reduced pressure, the residue was purified by flash chromatography to get the brominated cyanoester, which is very unstable, should be kept in -20 °Cfridge.

#### 4. Procedures for the preparation of hydroxylamines<sup>[2]</sup>

##### 1. The synthesis of N-benzyl-N-hydroxybenzamide

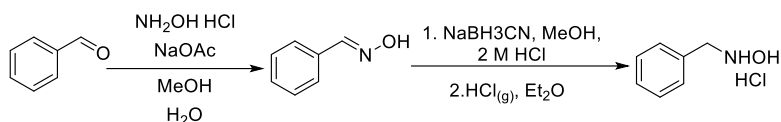

**Step 1:** Aldehyde (50 mmol), hydroxylamine hydrochloride (6 g, 100 mmol), and sodium acetate trihydrate (13.6 g, 100 mmol) were placed in a mixture of methanol (250 ml) and water (50 ml), and stirred at ambient temperature for about 3 h. Upon the completion of reaction, the solvent was removed under reduced pressure and the resulting residue was dissolved in ethyl acetate (50 ml), and then washed with water. The organic layer was dried over anhydrous  $\text{Na}_2\text{SO}_4$  and the solvent was evaporated in vacuum. Then purification by flash chromatography can give the oxime as a white solid<sup>[2]</sup>.

**Step 2:** To a stirring solution of benzaldehyde oxime (4.85 g, 40 mmol, 1.0 equiv) in MeOH (60 mL) containing an altered pH strip were added solid  $\text{NaBH}_3\text{CN}$  (5.53 g, 88 mmol, 2.2 equiv) and aqueous HCl (2.0 M, about 50 mL) over 15 min in such a way that the pH of the solution stayed within 2–3 during the duration of the addition. The reaction mixture was allowed to stir for an additional 3.5 h, and then was quenched with the addition of aqueous 15% NaOH (until pH = 10). MeOH was removed *in vacuo*. The remaining aqueous solution was extracted with  $\text{CH}_2\text{Cl}_2$  ( $3 \times 100$  mL). The organic layers were combined, washed with brine (100 mL), dried over  $\text{Na}_2\text{SO}_4$ , and filtered. The filtrate was concentrated *in vacuo*. The crude residue was dissolved in  $\text{Et}_2\text{O}$  (75 mL) and gaseous HCl was piped into the solution generating a white precipitate. The precipitate was collected, and then washed with  $\text{Et}_2\text{O}$  and then hexanes to give *N*-benzylhydroxylamine hydrochloride as a white powder<sup>[3a,3b]</sup>.

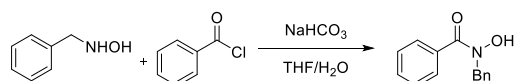

**Step 3:** To a stirring suspension of *N*-benzylhydroxylamine hydrochloride (20 mmol, 1.0 equiv) and  $\text{NaHCO}_3$  (40 mmol, 2.0 equiv) in THF/ $\text{H}_2\text{O}$  (22 mL 10:1) under  $\text{N}_2$  was added benzoyl chloride (22 mmol, 1.1 equiv) dropwise over 15 min. The reaction

mixture was allowed to stir for 15 h, and was then diluted with H<sub>2</sub>O (20 mL). The mixture was extracted with CH<sub>2</sub>Cl<sub>2</sub> (3 × 10 mL). The organic layers were combined, washed with brine (10 mL), dried over Na<sub>2</sub>SO<sub>4</sub>, and filtered. The filtrate was concentrated *in vacuo*. Hexanes was added to the residue. The resulting white precipitate was collected and washed with hexanes to give hydroxylamine as a white solid<sup>[3a,3c,3d]</sup>.

## 2. The synthesis of N-hydroxy-N-phenylbenzamide

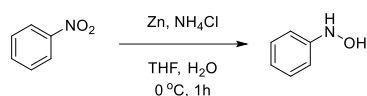

**Step 1:** To a solution of nitrobenzene (10 mmol, 1.0 equiv), and NH<sub>4</sub>Cl (11 mmol, 1.1 equiv) in THF (40 mL) and H<sub>2</sub>O (20 mL) was added Zn (20 mmol, 2.0 equiv) at 0 °C. The reaction mixture was stirred at 0 °C for 1 h, then filtered through a short pad of Celite and extracted with Et<sub>2</sub>O. The combined organic layers were washed with brine, dried with Na<sub>2</sub>SO<sub>4</sub>, and solvent was evaporated. Recrystallization from hexane/DCM afforded *N*-phenylhydroxylamine (676 mg, 62%)<sup>[4][5]</sup>.

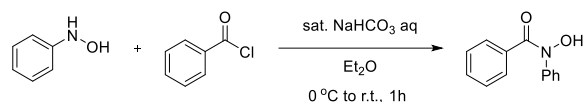

**Step 2:** To a solution of *N*-phenylhydroxylamine (10 mmol, 1.0 equiv) in ether (15 mL) was added saturated aqueous solution (10 mL) of sodium bicarbonate. After cooling to 0 °C, benzoyl chloride (11 mmol, 1.1 equiv) was added dropwise to the solution. Then, the solution was stirred for 1 hour with allowing the solution to room temperature. The reaction was quenched by saturated aqueous ammonium chloride. After the mixture was extracted with ether, the organic layer was washed by brine and dried over sodium sulfate. After the solvent was removed *in vacuo*, the crude product was purified by recrystallization (Hexane/DCM) to obtain *N*-hydroxy-*N*-phenylbenzamide (1.8 g, 85%)<sup>[4][5]</sup>.

## 5. Procedure for the coupling of bromides with hydroxylamines

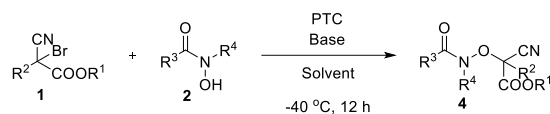

A solution of bromide **1** (1.0 equiv.), hydroxylamine **2** (1.2 equiv.) and PTC (5 mol%) in corresponding solvent (2 mL) was cooled to -40 °C, and then base (1.2 equiv.) was added in one portion. The mixture was stirred at -40 °C for 12 h. After the starting material reacted completely, NH<sub>4</sub>Cl was employed to quench the reaction, Et<sub>2</sub>O was used to extract the crude product, then purification by short silica gel column to give the desired product **4**.

## 6. Procedure for the coupling of Bromides with phenol

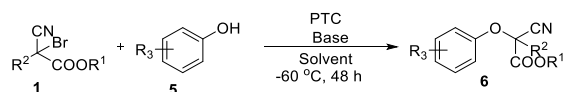

A solution of bromide **1** (1.0 equiv.), phenol **5** (1.2 equiv.) and PTC (5 mol%) in corresponding solvent (2 mL) was cooled to -60 °C, and then base (1.2 equiv.) was added in one portion. The mixture was stirred at -60 °C for 48 h. After the starting material reacted completely, NH<sub>4</sub>Cl was employed to quench the reaction, Et<sub>2</sub>O was used to extract the crude product, then purification by short silica gel column to give the desired product **6**.



## 7. Procedure for the synthesis of Bicalutamid<sup>[6]</sup>

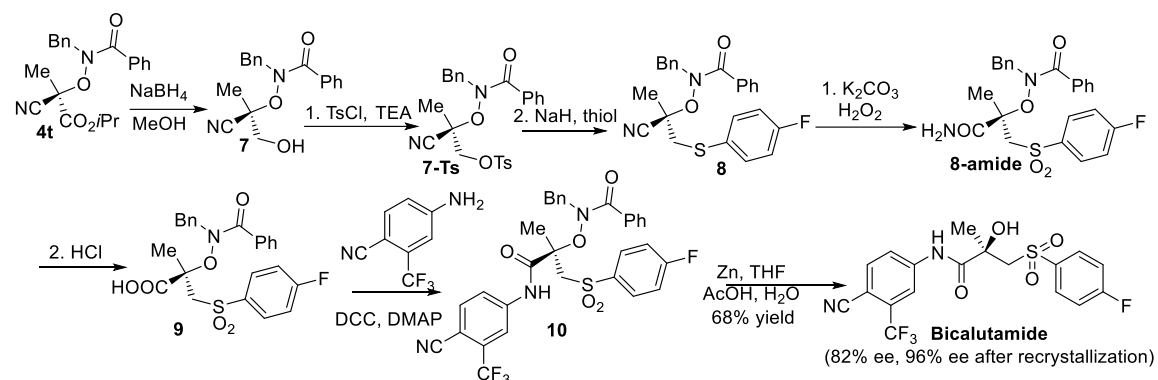

**Step 1:** To the solution of **4t** in MeOH was added NaBH<sub>4</sub> (2.0 equiv.) by portions, and this mixture was stirred at room temperature for 2 hours, TLC monitored the process. Water was added to the reaction mixture and then washed with Et<sub>2</sub>O. The organic layer was separated, concentrated for silica gel column to afford the primary alcohol **7** as a colorless oil.

**Step 2:** Dissolve the primary alcohol **7** into DCM, and adding Bn<sub>2</sub>SnO (0.1 equiv.), TsCl (1.2 equiv.), and TEA (2.0 equiv.) by sequence, then stirred at room temperature for 2 hours. TLC monitored the process, after the completion of this reaction, DCM was added to dilute and then washed using water. The organic layer was separated and concentrated for silica gel column to afford the desired product **7-Ts** as a colorless oil.

To a solution of **7-Ts** in DMF was added the 4-fluorobenzenethiol (2.0 equiv.), and adding NaH (2.5 equiv.) by portions at room temperature, then heat to 50 °C for overnight. After the completion of the reaction, water was added, Et<sub>2</sub>O was employed to extract the mixture and then purification by silica gel column to afford the desired product **8** as a colorless oil.

**Step 3:** Dissolve **8** into acetone, and added Na<sub>2</sub>CO<sub>3</sub> (2.0 equiv.), and then 36% aq. H<sub>2</sub>O<sub>2</sub> (10 equiv.) was added, this mixture was stirred overnight. TLC monitored the process, after the completion of the reaction, acetone was removed under depressed pressure, and Et<sub>2</sub>O was employed to extract the product. After concentration, the crude amide

was purified by silica gel column to afford the amide **8-amide**.

Dissolved the amide into con. HCl, and heated to 50 °C overnight. Adding water to the reaction mixture, and DCM for extraction. The DCM layer was separated and concentrated to afford the crude free carboxylic acid **9**.

**Step 4:** To a solution of crude carboxylic acid **9** in dry DCM was added 4-amino-2-(trifluoromethyl)benzotrile (1.2 equiv.), and then DCC (2.0 equiv.), DMAP (0.1 equiv.). The mixture was stirred under the protection of N<sub>2</sub> for 4 hours. After the completion of the reaction, the solid was removed away by simply filtration, the organic layer was concentrated for column to afforded the product **10**.

**Step 5:** Activated zinc (10 equiv) was added to a solution of **10** (1.0 equiv) in THF, acetic acid (0.5 mL) and H<sub>2</sub>O (0.5 mL). The reaction mixture was then warm to 60 °C, and stirred for 15 min. Activated zinc (10 equiv) was added to the reaction mixture every 15 min three times. The reaction mixture was quenched with saturated aqueous NaHCO<sub>3</sub> (2 mL) at room temperature. The resulting mixture was extracted with EtOAc (2x 5 mL). The combined organic extracts were washed with brine (2 mL), dried over Na<sub>2</sub>SO<sub>4</sub>, and concentrated. The residue was purified by silica gel column chromatography.

Activated zinc was prepared as follows. A mixture of zinc powder (25 g) and 3% aqueous HCl (100 mL) was sonicated for 10 min at room temperature. The mixture was filtrated through glass filter, washed with water (2x 100 mL), ethanol (2x 50 mL) and Et<sub>2</sub>O (2x 50 mL). The resulting zinc powder was dried under reduced pressure for 2 h.

## 8. Procedure for the synthesis of fabrate <sup>[7]</sup>

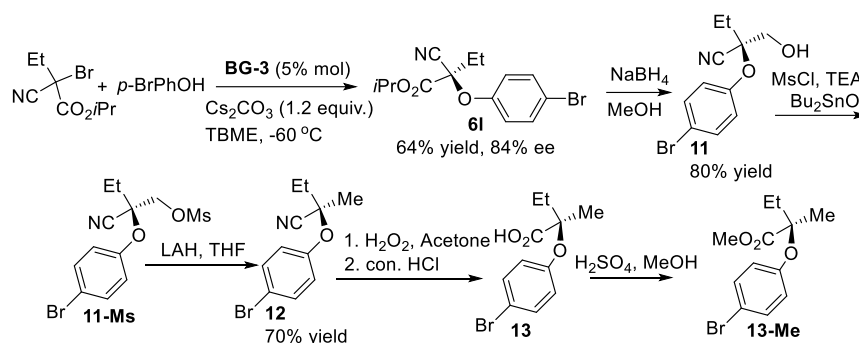

**Step 1:** A solution of bromide (1.0 equiv.), phenol (1.2 equiv.) and PTC (5 mol%) in TBME (2 mL) was cooled to  $-60\text{ }^\circ\text{C}$ , and then  $\text{Cs}_2\text{CO}_3$  (1.2 equiv.) was added in one portion. The mixture was stirred at  $-60\text{ }^\circ\text{C}$  for 3 days. After the starting material reacted completely, aq.  $\text{NH}_4\text{Cl}$  was employed to quench the reaction,  $\text{Et}_2\text{O}$  was used to extract the crude product, then purification by short silica gel column to give the desired product **6I**.

**Step 2:** To the solution of **6I** in MeOH was added  $\text{NaBH}_4$  (2.0 equiv.) by portions, and this mixture was stirred at room temperature for 2 hours, TLC monitored the process. Water was added to the reaction mixture and then washed with  $\text{Et}_2\text{O}$ . The organic layer was separated, concentrated for silica gel column to afford the primary alcohol **11** as a colorless oil.

**Step 3:** Dissolve the primary alcohol **11** into DCM, and adding  $\text{Bn}_2\text{SnO}$  (0.1 equiv.),  $\text{MsCl}$  (1.2 equiv.), and TEA (2.0 equiv.) by sequence, then stirred at room temperature for 2 hours. TLC monitored the process, after the completion of this reaction, DCM was added to dilute and then washed using water. The organic layer was separated and concentrated for silica gel column to afford the desired product **11-Ms** as a colorless oil.

**Step 4:** To a solution of the protected alcohol **11-Ms** in dry THF was added LAH (2.0 equiv.), the mixture was refluxed under the protection of  $\text{N}_2$  for overnight. After the completion of the reaction, the temperature was cooled down to room temperature, *Sat.*  $\text{NH}_4\text{Cl}$  was added to quench LAH,  $\text{Et}_2\text{O}$  was added, and washed with water, the organic

layer was separated and concentrated for column to afforded the product **12** as a colorless oil.

**Step 5:** Dissolve the **12** into acetone, and added  $\text{Na}_2\text{CO}_3$  (2.0 equiv.), and then 36% aq.  $\text{H}_2\text{O}_2$  (10 equiv.) was added, this mixture was stirred overnight. TLC monitored the process, after the completion of the reaction, acetone was removed under depressed pressure, and  $\text{Et}_2\text{O}$  was employed to extract the product. After concentration, the crude amide was used directly without further purification. Dissolved the amide into con.  $\text{HCl}$ , and heated to  $50\text{ }^\circ\text{C}$  overnight. Adding water to the reaction mixture, and  $\text{DCM}$  for extraction. The  $\text{DCM}$  layer was separated and concentrated to afford the crude free carboxylic acid. Dissolve the carboxylic acid into  $\text{MeOH}$ , to this mixture was added 1 ml con.  $\text{H}_2\text{SO}_4$  by dropwise, and stirred at rt overnight. Adding water to the reaction mixture, and  $\text{Et}_2\text{O}$  was employed to extract the desired product, and further purification using silica gel column to afford **13** as a colorless oil.

## 9. Characterization of the substrates and products

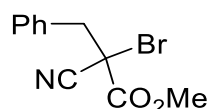

**Methyl 2-bromo-2-cyano-3-phenylpropanoate (1a):** method A; colorless oil; 87% yield; TLC (Hexane: $\text{Et}_2\text{O}$ , 90:10 v/v):  $R_f = 0.20$ ;  $^1\text{H}$  NMR (400 MHz, Chloroform-d):  $\delta$  7.41 – 7.31 (m, 5H), 3.85 (s, 3H), 3.73 (d,  $J = 13.8$  Hz, 1H), 3.52 (d,  $J = 13.8$  Hz, 1H);  $^{13}\text{C}$  NMR (101 MHz, Chloroform-d):  $\delta$  164.6, 132.8, 130.5, 129.0, 128.8, 115.5, 54.9, 45.7, 42.4; HRMS (ESI) calcd for  $\text{C}_{11}\text{H}_{11}\text{NO}_2\text{Br}$   $m/z$   $[\text{M}+\text{H}]^+$  : 267.9968; found: 267.9967.

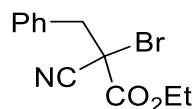

**Ethyl 2-bromo-2-cyano-3-phenylpropanoate (1b):** method B; colorless oil; 76% yield; TLC (Hexane: $\text{Et}_2\text{O}$ , 90:10 v/v):  $R_f = 0.31$ ;  $^1\text{H}$  NMR (400 MHz,  $\text{CDCl}_3$ )  $\delta$  7.38 (s, 5H), 4.53 – 4.17 (m, 2H), 3.75 (d,  $J = 13.8$  Hz, 1H), 3.55 (d,  $J = 13.8$  Hz, 1H), 1.31 (t,  $J = 7.1$  Hz, 3H).  $^{13}\text{C}$  NMR (101 MHz,  $\text{CDCl}_3$ )  $\delta$  163.94, 132.81, 130.42, 128.73, 115.48, 64.43, 45.55, 42.68, 30.89, 13.66. HRMS (ESI) calcd for  $\text{C}_{12}\text{H}_{13}\text{BrNO}_2$   $m/z$   $[\text{M}+\text{H}]^+$  : 282.0124; found: 282.0124.

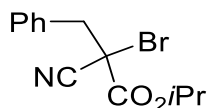

**Isopropyl 2-bromo-2-cyano-3-phenylpropanoate (1c):** method B; colorless oil; 87% yield; TLC (Hexane:Et<sub>2</sub>O, 90:10 v/v): R<sub>f</sub> = 0.35; <sup>1</sup>H NMR (400 MHz, CDCl<sub>3</sub>) δ 7.37 (s, 5H), 5.09 (dt, J = 12.5, 6.3 Hz, 1H), 3.75 (d, J = 13.9 Hz, 1H), 3.55 (d, J = 13.9 Hz, 1H), 3.50 (q, J = 7.0 Hz, 1H), 1.33 (d, J = 6.3 Hz, 3H), 1.25 – 1.22 (m, 3H). <sup>13</sup>C NMR (101 MHz, CDCl<sub>3</sub>) δ 165.24, 134.82, 134.18, 130.13, 129.02, 128.77, 128.48, 127.83, 117.73, 72.59, 65.86, 46.76, 43.40, 21.20, 20.81, 15.79, 15.29. HRMS (ESI) calcd for C<sub>13</sub>H<sub>15</sub>BrNO<sub>2</sub> m/z [M+H]<sup>+</sup>: 296.0281; found: 296.0280.

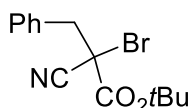

**tert-Butyl 2-bromo-2-cyano-3-phenylpropanoate (1d):** method B A; colorless oil; 90% yield; TLC (Hexane:Et<sub>2</sub>O, 90:10 v/v): R<sub>f</sub> = 0.35; <sup>1</sup>H NMR (400 MHz, CDCl<sub>3</sub>) δ 7.38 (t, J = 2.1 Hz, 5H), 3.72 (d, J = 13.8 Hz, 1H), 3.50 (d, J = 13.8 Hz, 1H), 1.50 (s, 9H). <sup>13</sup>C NMR (101 MHz, CDCl<sub>3</sub>) δ 162.55, 133.05, 130.49, 128.63, 115.81, 86.23, 45.46, 43.96, 27.44. HRMS (ESI) calcd for C<sub>14</sub>H<sub>17</sub>BrNO<sub>2</sub> m/z [M+H]<sup>+</sup>: 310.0437; found: 310.0445.

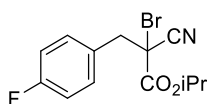

**isopropyl 2-bromo-2-cyano-3-(4-fluorophenyl)propanoate (1e)** colorless oil; 66% yield; <sup>1</sup>H NMR (400 MHz, Chloroform-*d*) δ 7.38 – 7.31 (m, 2H), 7.03 (t, J = 8.6 Hz, 2H), 5.13 – 5.03 (m, 1H), 3.68 (d, J = 14.0 Hz, 1H), 3.48 (d, J = 14.0 Hz, 1H), 1.32 (d, J = 6.3 Hz, 2H), 1.22 (d, J = 6.3 Hz, 3H). <sup>13</sup>C NMR (100 MHz, Chloroform-*d*) δ 164.21, 163.36, 161.74, 132.38, 132.29, 128.72, 115.96, 115.74, 73.20, 44.64, 42.92, 21.33, 21.18. <sup>19</sup>F NMR (376 MHz, CHLOROFORM-*D*) δ -112.84. HRMS (ESI) calcd for C<sub>13</sub>H<sub>14</sub>BrFNO<sub>2</sub> m/z [M+H]<sup>+</sup>: 314.0192; found: 314.0159.

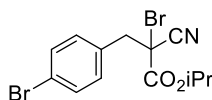

**isopropyl 2-bromo-3-(4-bromophenyl)-2-cyanopropanoate:** yellow oil; 69% yield; <sup>1</sup>H NMR (400 MHz, Chloroform-*d*) δ 7.49 (d, J = 8.3 Hz, 2H), 7.24 (d, J = 8.3 Hz, 2H), 5.14 – 5.03 (m, 1H), 3.66 (d, J = 13.9 Hz, 1H), 3.46 (d, J = 14.0 Hz, 1H), 1.33 (d, J = 6.3 Hz, 3H), 1.24 (d, J = 6.3 Hz, 3H). <sup>13</sup>C NMR (100 MHz, Chloroform-*d*) δ 163.28, 132.21, 132.21, 132.04, 132.04, 131.86, 123.10, 115.40, 73.30, 44.73, 42.54, 21.34, 21.17. HRMS (ESI) calcd for C<sub>13</sub>H<sub>14</sub>Br<sub>2</sub>NO<sub>2</sub> m/z [M+H]<sup>+</sup>: 373.9391; found: 373.9429.

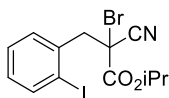

**isopropyl 2-bromo-2-cyano-3-(2-iodophenyl)propanoate(1g):** yellow oil; 80% yield; <sup>1</sup>H NMR (400 MHz, Chloroform-*d*) δ 7.91 (d, J = 7.9 Hz, 1H), 7.48 – 7.41 (m, 1H), 7.33 (t, J = 7.6 Hz, 1H), 7.05 – 6.99 (m, 1H), 5.22 – 5.06 (m, 1H), 3.87 (d, J = 1.3 Hz,

2H), 1.34 – 1.28 (m, 6H).  $^{13}\text{C}$  NMR (100 MHz, Chloroform-*d*)  $\delta$  163.49, 136.54, 130.17, 130.14, 128.69, 115.36, 102.69, 100.01, 73.41, 48.18, 42.46, 21.37, 21.18. HRMS (ESI) calcd for  $\text{C}_{13}\text{H}_{14}\text{BrINO}_2$   $m/z$   $[\text{M}+\text{H}]^+$ : 421.9253; found: 421.9270.

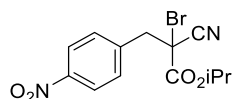

**isopropyl 2-bromo-2-cyano-3-(4-nitrophenyl)propanoate (1h)**: white solid; 87% yield;  $^1\text{H}$  NMR (400 MHz, Chloroform-*d*)  $\delta$  8.23 (d,  $J = 9.4$  Hz, 1H), 7.58 (d,  $J = 9.1$  Hz, 1H), 5.18 – 5.07 (m, 1H), 3.80 (d,  $J = 13.8$  Hz, 1H), 3.61 (d,  $J = 13.9$  Hz, 1H), 1.35 (d,  $J = 6.5$  Hz, 1H), 1.28 (d,  $J = 5.3$  Hz, 1H).  $^{13}\text{C}$  NMR (100 MHz, Chloroform-*d*)  $\delta$  163.03, 139.91, 139.91, 131.70, 131.70, 123.96, 123.95, 115.07, 73.68, 44.57, 41.85, 21.37, 21.13. HRMS (ESI) calcd for  $\text{C}_{13}\text{H}_{14}\text{BrN}_2\text{O}_4$   $m/z$   $[\text{M}+\text{H}]^+$ : 341.0137; found: 341.0119.

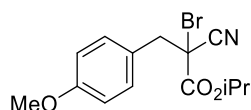

**isopropyl 2-bromo-2-cyano-3-(4-methoxyphenyl)propanoate (1i)**: white solid; 90% yield;  $^1\text{H}$  NMR (400 MHz, Chloroform-*d*)  $\delta$  7.27 (d,  $J = 8.8$  Hz, 2H), 6.87 (d,  $J = 8.8$  Hz, 2H), 5.16 – 4.99 (m, 1H), 3.80 (s, 3H), 3.66 (d,  $J = 13.8$  Hz, 1H), 3.44 (d,  $J = 13.9$  Hz, 1H), 1.32 (d,  $J = 6.3$  Hz, 3H), 1.22 (d,  $J = 6.2$  Hz, 3H).  $^{13}\text{C}$  NMR (100 MHz, Chloroform-*d*)  $\delta$  163.54, 159.88, 131.72, 131.72, 124.96, 115.74, 114.22, 114.21, 72.98, 55.34, 44.84, 43.34, 21.33, 21.21. HRMS (ESI) calcd for  $\text{C}_{14}\text{H}_{17}\text{BrNO}_3$   $m/z$   $[\text{M}+\text{H}]^+$ : 326.0392; found: 326.0384.

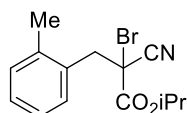

**isopropyl 2-bromo-2-cyano-3-(o-tolyl)propanoate (1j)**: yellow oil; 78% yield;  $^1\text{H}$  NMR (300 MHz, Chloroform-*d*)  $\delta$  7.32 (d,  $J = 7.4$  Hz, 1H), 7.28 – 7.12 (m, 3H), 5.19 – 5.03 (m, 1H), 3.79 – 3.60 (m, 2H), 2.45 (s, 3H), 1.32 (d,  $J = 6.2$  Hz, 3H), 1.24 (d,  $J = 6.3$  Hz, 3H).  $^{13}\text{C}$  NMR (75 MHz, Chloroform-*d*)  $\delta$  163.77, 137.68, 131.69, 131.20, 130.13, 128.54, 128.54, 126.25, 73.12, 43.00, 41.63, 21.25, 21.13, 20.05. HRMS (ESI) calcd for  $\text{C}_{14}\text{H}_{17}\text{BrNO}_2$   $m/z$   $[\text{M}+\text{H}]^+$ : 310.0443; found: 310.0458.

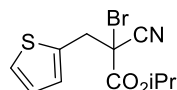

**isopropyl 2-bromo-2-cyano-3-(thiophen-2-yl)propanoate (1k)**: yellow oil; 86% yield;  $^1\text{H}$  NMR (400 MHz, Chloroform-*d*)  $\delta$  7.28 (dd,  $J = 5.2, 1.3$  Hz, 1H), 7.11 – 7.08 (m, 1H), 6.99 (dd,  $J = 5.2, 3.5$  Hz, 1H), 5.17 – 5.06 (m, 1H), 3.95 (d,  $J = 14.0$  Hz, 1H), 3.72 (d,  $J = 14.1$  Hz, 1H), 1.34 (d,  $J = 6.3$  Hz, 3H), 1.27 (d,  $J = 6.3$  Hz, 3H).  $^{13}\text{C}$  NMR (100 MHz, Chloroform-*d*)  $\delta$  163.30, 133.94, 129.46, 127.36, 126.74, 100.00, 73.29, 42.31, 40.07, 21.33, 21.20. HRMS (ESI) calcd for  $\text{C}_{11}\text{H}_{13}\text{BrNO}_2\text{S}$   $m/z$   $[\text{M}+\text{H}]^+$ : 301.9850; found: 301.9863.

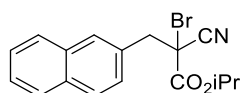

**isopropyl 2-bromo-2-cyano-3-(naphthalen-2-yl)propanoate (1l):** yellow oil; 86% yield;  $^1\text{H}$  NMR (300 MHz, Chloroform-*d*)  $\delta$  7.92 – 7.80 (m, 4H), 7.59 – 7.45 (m, 3H), 5.17 – 5.06 (m, 1H), 3.93 (d,  $J = 13.8$  Hz, 1H), 3.71 (d,  $J = 13.8$  Hz, 1H), 1.35 (d,  $J = 6.3$  Hz, 3H), 1.20 (d,  $J = 6.2$  Hz, 3H).  $^{13}\text{C}$  NMR (75 MHz, Chloroform-*d*)  $\delta$  163.44, 133.23, 133.10, 130.34, 129.96, 128.53, 128.01, 127.75, 127.71, 126.58, 126.47, 115.62, 73.07, 45.60, 43.00, 21.21, 21.13. HRMS (ESI) calcd for  $\text{C}_{17}\text{H}_{17}\text{BrNO}_2$   $m/z$   $[\text{M}+\text{H}]^+$ : 346.0443; found: 346.0429.

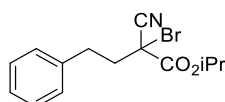

**isopropyl 2-bromo-2-cyano-4-phenylbutanoate (1m):** yellow oil; 82% yield;  $^1\text{H}$  NMR (400 MHz, Chloroform-*d*)  $\delta$  7.35 – 7.29 (m, 2H), 7.25 – 7.18 (m, 3H), 5.18 – 5.06 (m, 1H), 3.03 – 2.92 (m, 1H), 2.86 – 2.74 (m, 1H), 2.69 – 2.49 (m, 2H), 1.37 – 1.34 (m, 6H).  $^{13}\text{C}$  NMR (100 MHz, Chloroform-*d*)  $\delta$  163.48, 138.64, 128.84, 128.84, 128.57, 128.57, 126.90, 115.67, 42.78, 41.63, 32.67, 31.00, 21.39, 21.23. HRMS (ESI) calcd for  $\text{C}_{14}\text{H}_{17}\text{BrNO}_2$   $m/z$   $[\text{M}+\text{H}]^+$ : 310.0443; found: 310.0446.

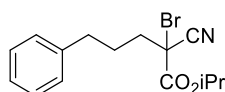

**isopropyl 2-bromo-2-cyano-5-phenylpentanoate (1n):** yellow oil; 79% yield;  $^1\text{H}$  NMR (400 MHz, Chloroform-*d*)  $\delta$  7.34 – 7.27 (m, 2H), 7.25 – 7.21 (m, 1H), 7.21 – 7.16 (m, 2H), 5.18 – 5.06 (m, 1H), 2.73 (t,  $J = 7.5$  Hz, 2H), 2.40 – 2.22 (m, 2H), 2.07 – 1.94 (m, 1H), 1.89 – 1.75 (m, 1H), 1.36 – 1.30 (m, 6H).  $^{13}\text{C}$  NMR (100 MHz, Chloroform-*d*)  $\delta$  163.51, 140.40, 128.58, 128.58, 128.32, 128.32, 126.33, 115.69, 72.79, 64.24, 39.27, 34.80, 27.77, 21.29, 21.10. HRMS (ESI) calcd for  $\text{C}_{15}\text{H}_{19}\text{BrNO}_2$   $m/z$   $[\text{M}+\text{H}]^+$ : 324.0599; found: 324.0626.

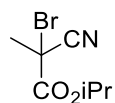

**isopropyl 2-bromo-2-cyanopropanoate (1o):** yellow oil; 88% yield;  $^1\text{H}$  NMR (400 MHz, Chloroform-*d*)  $\delta$  5.42 – 4.91 (m, 1H), 2.19 (s, 3H), 1.36 (dd,  $J = 6.3, 3.1$  Hz, 6H).  $^{13}\text{C}$  NMR (100 MHz, Chloroform-*d*)  $\delta$  163.84, 116.63, 72.85, 37.10, 27.87, 21.26, 21.06. HRMS (ESI) calcd for  $\text{C}_7\text{H}_{11}\text{BrNO}_2$   $m/z$   $[\text{M}+\text{H}]^+$ : 219.9973; found: 219.9985.

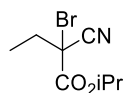

**isopropyl 2-bromo-2-cyanobutanoate (1p):** colorless oil; 90% yield;  $^1\text{H}$  NMR (400 MHz, Chloroform-*d*)  $\delta$  5.21 – 5.07 (m, 1H), 2.41 – 2.23 (m, 2H), 1.34 (d,  $J = 6.3$  Hz, 6H), 1.18 (t,  $J = 7.3$  Hz, 3H).  $^{13}\text{C}$  NMR (100 MHz, Chloroform-*d*)  $\delta$  163.53, 115.57, 72.69, 44.56, 33.66, 21.30, 21.13, 10.58. HRMS (ESI) calcd for  $\text{C}_8\text{H}_{13}\text{BrNO}_2$   $m/z$   $[\text{M}+\text{H}]^+$ : 234.0130; found: 234.0172.

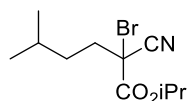

**isopropyl 2-bromo-2-cyano-5-methylhexanoate (1q):** colorless oil; 80% yield;  $^1\text{H}$  NMR (400 MHz, Chloroform-*d*)  $\delta$  5.16 – 5.09 (m, 1H), 5.08 (s, 1H), 2.41 – 2.15 (m, 4H), 1.68 (s, 3H), 1.63 (s, 3H), 1.34 (d,  $J = 6.3$  Hz, 6H).  $^{13}\text{C}$  NMR (100 MHz, Chloroform-*d*)  $\delta$  163.58, 115.76, 72.65, 43.48, 38.06, 34.97, 27.71, 22.25, 21.29, 21.15, 21.12. HRMS (ESI) calcd for  $\text{C}_{11}\text{H}_{19}\text{BrNO}_2$   $m/z$   $[\text{M}+\text{H}]^+$ : 276.0559; found: 276.0597.

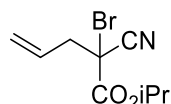

**isopropyl 2-bromo-2-cyanopent-4-enoate (1r):** colorless oil; 92% yield;  $^1\text{H}$  NMR (400 MHz, Chloroform-*d*)  $\delta$  5.86 – 5.74 (m, 1H), 5.37 (d,  $J = 1.2$  Hz, 1H), 5.35 – 5.31 (m, 1H), 5.17 – 5.06 (m, 1H), 3.12 – 3.03 (m, 1H), 3.01 – 2.92 (m, 1H), 1.33 (d,  $J = 6.3$  Hz, 6H).  $^{13}\text{C}$  NMR (100 MHz, Chloroform-*d*)  $\delta$  163.12, 129.40, 122.79, 115.35, 72.95, 72.86, 43.86, 21.31, 21.13. HRMS (ESI) calcd for  $\text{C}_9\text{H}_{13}\text{BrNO}_2$   $m/z$   $[\text{M}+\text{H}]^+$ : 246.0130; found: 246.0139.

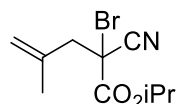

**isopropyl 2-bromo-2-cyano-4-methylpent-4-enoate (1s):** colorless oil; 75% yield;  $^1\text{H}$  NMR (400 MHz, Chloroform-*d*)  $\delta$  5.17 – 5.08 (m, 1H), 5.08 – 5.04 (m, 1H), 4.97 (d,  $J = 5.2$  Hz, 1H), 3.19 (dd,  $J = 14.0, 5.8$  Hz, 1H), 2.96 (dd,  $J = 14.0, 5.7$  Hz, 1H), 1.86 (d,  $J = 5.3$  Hz, 3H), 1.38 – 1.30 (m, 6H).  $^{13}\text{C}$  NMR (100 MHz, Chloroform-*d*)  $\delta$  163.68, 138.40, 117.95, 117.94, 116.03, 73.00, 47.28, 41.45, 23.19, 21.37. HRMS (ESI) calcd for  $\text{C}_{10}\text{H}_{15}\text{BrNO}_2$   $m/z$   $[\text{M}+\text{H}]^+$ : 260.0286; found: 260.0312

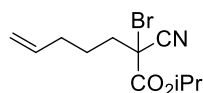

**isopropyl 2-bromo-2-cyanohept-6-enoate (1t)** colorless oil; 74% yield;  $^1\text{H}$  NMR (400 MHz, Chloroform-*d*)  $\delta$  5.83 – 5.71 (m, 1H), 5.17 – 5.10 (m, 1H), 5.10 – 5.01 (m, 2H), 2.37 – 2.21 (m, 2H), 2.20 – 2.13 (m, 2H), 1.83 – 1.71 (m, 1H), 1.64 – 1.51 (m, 1H), 1.35 (dd,  $J = 6.3, 1.3$  Hz, 6H).  $^{13}\text{C}$  NMR (100 MHz, Chloroform-*d*)  $\delta$  163.56, 136.77, 116.04, 115.73, 72.77, 39.22, 32.61, 25.39, 21.31, 21.16, 21.13. HRMS (ESI) calcd for  $\text{C}_{11}\text{H}_{17}\text{BrNO}_2$   $m/z$   $[\text{M}+\text{H}]^+$ : 274.0437; found: 247.0430.

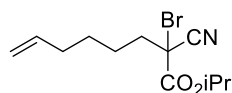

**isopropyl 2-bromo-2-cyano-oct-7-enoate (1u):** colorless oil; 70% yield;  $^1\text{H}$  NMR (400 MHz, Chloroform-*d*)  $\delta$  6.00 – 5.61 (m, 1H), 5.22 – 5.07 (m, 1H), 5.07 – 4.93 (m, 2H), 2.45 – 2.18 (m, 2H), 2.19 – 1.98 (m, 2H), 1.80 – 1.60 (m, 1H), 1.56 – 1.42 (m, 3H), 1.34 (dd,  $J = 6.3, 1.0$  Hz, 6H).  $^{13}\text{C}$  NMR (100 MHz, Chloroform-*d*)  $\delta$  163.60, 137.76, 115.75, 115.19, 72.73, 43.19, 39.74, 33.13, 27.97, 25.66, 21.30, 21.13. HRMS (ESI) calcd for  $\text{C}_{12}\text{H}_{19}\text{BrNO}_2$   $m/z$   $[\text{M}+\text{H}]^+$ : 288.0599; found: 288.0620.



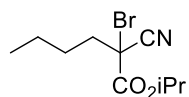

**isopropyl 2-bromo-2-cyano-5-hexanoate (1v):** colorless oil; 85% yield;  $^1\text{H}$  NMR (400 MHz, Chloroform-*d*)  $\delta$  5.20 – 5.08 (m, 1H), 2.38 – 2.19 (m, 2H), 1.70 – 1.58 (m, 1H), 1.50 – 1.39 (m, 3H), 1.35 (dd,  $J = 6.3, 1.3$  Hz, 6H), 0.95 (t,  $J = 7.1$  Hz, 3H).  $^{13}\text{C}$  NMR (100 MHz, Chloroform-*d*)  $\delta$  163.66, 115.81, 72.69, 43.31, 39.65, 28.31, 21.99, 21.31, 21.13, 13.64. HRMS (ESI) calcd for  $\text{C}_{10}\text{H}_{17}\text{BrNO}_2$   $m/z$   $[\text{M}+\text{H}]^+$ : 262.0443; found: 262.0428.

## 10. Characterization of the products

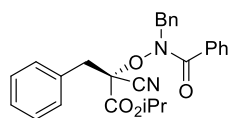

**isopropyl (R)-2-((N-benzylbenzamido)oxy)-2-cyano-3-phenylpropanoate (4g):** colorless oil; 85% yield;  $^1\text{H}$  NMR (400 MHz, Chloroform-*d*)  $\delta$  7.64 – 7.59 (m, 2H), 7.49 (t,  $J = 7.4$  Hz, 1H), 7.41 (dd,  $J = 8.3, 6.7$  Hz, 2H), 7.31 – 7.21 (m, 8H), 7.09 (dd,  $J = 6.6, 3.0$  Hz, 2H), 5.03 – 4.92 (m, 1H), 4.89 – 4.76 (m, 2H), 3.40 – 3.24 (m, 2H), 1.22 (d,  $J = 6.3$  Hz, 3H), 1.12 (d,  $J = 6.3$  Hz, 3H).  $^{13}\text{C}$  NMR (100 MHz, Chloroform-*d*)  $\delta$  173.77, 164.12, 134.96, 133.84, 131.77, 131.77, 131.45, 131.45, 130.77, 130.77, 128.67, 128.67, 128.63, 128.62, 128.59, 128.22, 128.14, 128.14, 115.28, 100.00, 84.20, 72.34, 57.08, 42.21, 21.56, 21.56, 21.39. HRMS (ESI) calcd for  $\text{C}_{27}\text{H}_{27}\text{N}_2\text{O}_4$   $m/z$   $[\text{M}+\text{H}]^+$ : 443.1971; found: 443.1980.  $[\alpha]_D^{22} = -22.6$  (c 0.97,  $\text{CHCl}_3$ ); HPLC analysis: Chiralcel IB (Hex/IPA = 95/5, 1.0 mL/min, 254 nm, 22°C), 8.3 (major), 9.9 min, 90% ee.

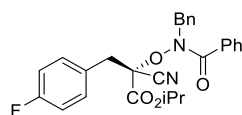

**isopropyl (R)-2-((N-benzylbenzamido)oxy)-2-cyano-3-(4-fluorophenyl)propanoate (4i):** colorless oil; 75% yield;  $^1\text{H}$  NMR (400 MHz, Chloroform-*d*)  $\delta$  7.65 – 7.59 (m, 2H), 7.54 – 7.47 (m, 1H), 7.46 – 7.39 (m, 2H), 7.32 – 7.26 (m, 3H), 7.20 (dd,  $J = 8.3, 5.3$  Hz, 2H), 7.08 (dd,  $J = 5.9, 2.9$  Hz, 2H), 6.95 (t,  $J = 8.7$  Hz, 2H), 5.06 – 4.95 (m, 1H), 4.89 – 4.74 (m, 2H), 3.40 – 3.22 (m, 2H), 1.24 (d,  $J = 6.3$  Hz, 3H), 1.17 (d,  $J = 6.3$  Hz, 3H).  $^{13}\text{C}$  NMR (100 MHz, Chloroform-*d*)  $\delta$  173.81, 164.01, 134.84, 133.72, 132.51, 132.42, 131.84, 128.68, 128.68, 128.64, 128.63, 128.63, 128.48, 128.48, 128.17, 128.17, 127.30, 127.27, 115.64, 115.43, 115.18, 83.91, 72.47, 57.18, 41.32, 21.55, 21.45.  $^{19}\text{F}$  NMR (376 MHz, CHLOROFORM-D)  $\delta$  -112.96. HRMS (ESI) calcd for  $\text{C}_{27}\text{H}_{26}\text{FN}_2\text{O}_4$   $m/z$   $[\text{M}+\text{H}]^+$ : 461.1877; found: 461.1877.  $[\alpha]_D^{22} = -4.9$  (c 0.92,  $\text{CHCl}_3$ ); HPLC analysis: Chiralcel IE (Hex/IPA = 70/30, 1.0 mL/min, 254 nm, 22°C), 9.9 (major), 20.9 min, 92% ee.

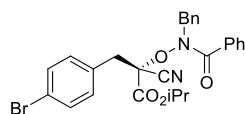

**isopropyl (R)-2-((N-benzylbenzamido)oxy)-3-(4-bromophenyl)-2-cyanopropanoate (4j):** yellow oil; 82% yield;  $^1\text{H}$  NMR (400 MHz, Chloroform-*d*)  $\delta$  7.64 – 7.58 (m, 2H), 7.54 – 7.47 (m, 1H), 7.45 – 7.41 (m, 2H), 7.41 – 7.36 (m, 3H), 7.30 – 7.27 (m, 2H), 7.13 – 7.07 (m, 2H), 7.07 – 7.02 (m, 2H), 5.08 – 4.95 (m, 1H), 4.90 – 4.73 (m, 2H), 3.33 (d,  $J = 14.0$  Hz, 1H), 3.24 (d,  $J = 14.0$  Hz, 1H), 1.24 (d,  $J = 6.3$  Hz, 3H), 1.18 (d,  $J = 6.3$  Hz, 3H).  $^{13}\text{C}$  NMR (100 MHz, Chloroform-*d*)  $\delta$  173.83, 163.92, 134.77, 133.68, 132.44, 131.85, 131.74, 130.54, 128.70, 128.70, 128.68, 128.64, 128.64, 128.62, 128.62, 128.46, 128.46, 128.18, 128.17, 122.49, 115.12, 83.55, 72.58, 57.22, 41.47, 21.55, 21.47. HRMS (ESI) calcd for  $\text{C}_{27}\text{H}_{26}\text{BrN}_2\text{O}_4$   $m/z$   $[\text{M}+\text{H}]^+$ :

521.1076; found: 521.1075.  $[\alpha]_D^{22} = -6.0$  (c 1.05, CHCl<sub>3</sub>); HPLC analysis: Chiralcel IE (Hex/IPA = 70/30, 1.0 mL/min, 254 nm, 22°C), 10.8 (major), 25.7 min, 89% ee.

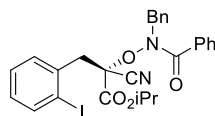

**isopropyl (R)-2-((N-benzylbenzamido)oxy)-2-cyano-3-(2-iodophenyl)propanoate (4k):** colorless oil; 75% yield; <sup>1</sup>H NMR (400 MHz, Chloroform-*d*) δ 7.85 (d, *J* = 8.0 Hz, 1H), 7.65 – 7.58 (m, 2H), 7.48 (t, *J* = 7.4 Hz, 1H), 7.40 (t, *J* = 7.6 Hz, 3H), 7.34 – 7.27 (m, 2H), 7.20 (t, *J* = 7.6 Hz, 1H), 7.15 – 7.07 (m, 3H), 6.96 (t, *J* = 7.7 Hz, 1H), 5.13 – 5.01 (m, 1H), 4.85 (q, *J* = 15.8 Hz, 2H), 3.65 (d, *J* = 14.8 Hz, 1H), 3.55 (d, *J* = 14.7 Hz, 1H), 1.25 (t, *J* = 6.9 Hz, 6H). <sup>13</sup>C NMR (100 MHz, Chloroform-*d*) δ 173.89, 163.98, 140.11, 135.03, 135.03, 133.75, 131.76, 131.42, 129.74, 128.68, 128.68, 128.65, 128.64, 128.51, 128.51, 128.40, 128.40, 128.11, 128.11, 114.85, 102.67, 83.27, 72.69, 57.22, 45.55, 21.53, 21.47. HRMS (ESI) calcd for C<sub>27</sub>H<sub>26</sub>IN<sub>2</sub>O<sub>4</sub> *m/z* [M+H]<sup>+</sup>: 569.0937; found: 569.0933.  $[\alpha]_D^{22} = -3.4$  (c 0.73, CHCl<sub>3</sub>); HPLC analysis: Chiralcel IC (Hex/IPA = 88/12, 1.0 mL/min, 254 nm, 22°C), 13.7 (major), 15.1 min, 82% ee.

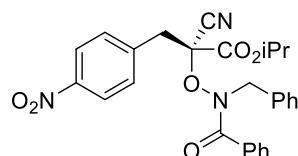

**isopropyl (R)-2-((N-benzylbenzamido)oxy)-2-cyano-3-(4-nitrophenyl)propanoate (4l):** colorless oil; 77% yield; <sup>1</sup>H NMR (400 MHz, Chloroform-*d*) δ 8.10 – 8.05 (m, 2H), 7.64 – 7.59 (m, 2H), 7.54 – 7.47 (m, 1H), 7.45 – 7.35 (m, 4H), 7.29 – 7.24 (m, 3H), 7.00 (dd, *J* = 7.7, 1.7 Hz, 2H), 5.09 – 5.01 (m, 1H), 4.86 (d, *J* = 15.8 Hz, 1H), 4.73 (d, *J* = 15.9 Hz, 1H), 3.51 (d, *J* = 13.9 Hz, 1H), 3.37 (d, *J* = 14.0 Hz, 1H), 1.23 (dd, *J* = 9.6, 6.3 Hz, 6H). <sup>13</sup>C NMR (100 MHz, Chloroform-*d*) δ 173.94, 163.63, 147.84, 139.06, 134.57, 133.46, 132.06, 131.84, 131.84, 130.28, 128.81, 128.70, 128.69, 128.59, 128.29, 128.27, 124.15, 123.61, 114.86, 82.85, 72.93, 57.47, 41.54, 41.54, 28.59, 21.54, 21.53. HRMS (ESI) calcd for C<sub>28</sub>H<sub>29</sub>N<sub>2</sub>O<sub>5</sub> *m/z* [M+H]<sup>+</sup>: 488.1822; found: 488.1819.  $[\alpha]_D^{22} = -2.3$  (c 1.29, CHCl<sub>3</sub>); HPLC analysis: Chiralcel IE (Hex/IPA = 70/30, 1.0 mL/min, 254 nm, 22°C), 12.8 (major), 28.7 min, 87% ee.

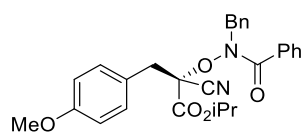

**isopropyl (R)-2-((N-benzylbenzamido)oxy)-2-cyano-3-(4-methoxyphenyl)propanoate (4m):** colorless oil; 78% yield; <sup>1</sup>H NMR (400 MHz, Chloroform-*d*) δ 7.63 – 7.57 (m, 2H), 7.52 – 7.45 (m, 1H), 7.44 – 7.37 (m, 2H), 7.31 – 7.24 (m, 3H), 7.18 – 7.06 (m, 4H), 6.83 – 6.75 (m, 2H), 5.03 – 4.94 (m, 1H), 4.88 – 4.76 (m, 2H), 3.78 (s, 3H), 3.32 – 3.19 (m, 2H), 1.23 (d, *J* = 6.3 Hz, 3H), 1.14 (d, *J* = 6.3 Hz, 3H). <sup>13</sup>C NMR (100 MHz, Chloroform-*d*) δ 173.72, 164.20, 159.55, 134.99, 134.99, 133.85, 131.86, 131.86, 131.72, 128.66, 128.65, 128.61, 128.61, 128.60, 128.56, 128.56, 128.11, 123.35, 115.36, 114.00, 100.01, 84.38, 72.27, 57.01, 55.32, 41.44, 21.58, 21.45. HRMS (ESI) calcd for C<sub>28</sub>H<sub>29</sub>N<sub>2</sub>O<sub>5</sub> *m/z* [M+H]<sup>+</sup>: 473.2076;

found: 473.2082.  $[a]_D^{22} = -24.3$  (c 0.29,  $\text{CHCl}_3$ ); HPLC analysis: Chiralcel IE (Hex/IPA = 70/30, 1.0 mL/min, 254 nm, 22°C), 16.7 (major), 39.6 min, 88% ee.

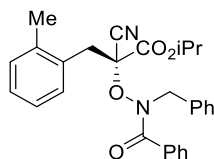

**isopropyl (R)-2-((N-benzylbenzamido)oxy)-2-cyano-3-(o-tolyl)propanoate (4n):** colorless oil; 76% yield.  $^1\text{H}$  NMR (400 MHz, Chloroform-*d*)  $\delta$  7.71 – 7.64 (m, 2H), 7.59 – 7.51 (m, 1H), 7.50 – 7.42 (m, 2H), 7.36 – 7.29 (m, 3H), 7.29 – 7.22 (m, 2H), 7.21 – 7.15 (m, 2H), 7.12 – 7.06 (m, 2H), 5.15 – 5.05 (m, 1H), 4.93 – 4.75 (m, 2H), 3.53 (d,  $J = 14.4$  Hz, 1H), 3.35 (d,  $J = 14.4$  Hz, 1H), 2.28 (s, 3H), 1.28 (dd,  $J = 15.5, 6.3$  Hz, 6H).  $^{13}\text{C}$  NMR (100 MHz, Chloroform-*d*)  $\delta$  173.61, 164.46, 138.18, 134.96, 133.84, 131.57, 130.97, 130.81, 130.22, 128.60, 128.60, 128.50, 128.50, 128.48, 128.48, 128.45, 128.45, 128.05, 127.96, 125.92, 115.27, 84.08, 72.30, 56.96, 38.54, 21.45, 21.32, 19.83. HRMS (ESI) calcd for  $\text{C}_{28}\text{H}_{29}\text{N}_2\text{O}_4$   $m/z$   $[\text{M}+\text{H}]^+$ : 457.2127; found: 457.2134.  $[a]_D^{22} = -7.0$  (c 0.46,  $\text{CHCl}_3$ ); HPLC analysis: Chiralcel IE (Hex/IPA = 90/10, 1.0 mL/min, 254 nm, 22°C), 21.3 (major), 31.3 min, 84% ee.

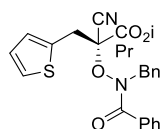

**isopropyl (R)-2-((N-benzylbenzamido)oxy)-2-cyano-3-(thiophen-2-yl)propanoate (4o):** yellow oil; 75% yield;  $^1\text{H}$  NMR (400 MHz, Chloroform-*d*)  $\delta$  7.64 – 7.58 (m, 2H), 7.54 – 7.46 (m, 1H), 7.42 (t,  $J = 7.5$  Hz, 2H), 7.30 – 7.26 (m, 3H), 7.23 (dd,  $J = 5.0, 1.1$  Hz, 1H), 7.12 (dd,  $J = 6.5, 3.4$  Hz, 2H), 7.00 – 6.92 (m, 2H), 5.07 – 4.99 (m, 1H), 4.88 (s, 2H), 3.57 (s, 2H), 1.25 (d,  $J = 6.3$  Hz, 3H), 1.20 (d,  $J = 6.4$  Hz, 3H).  $^{13}\text{C}$  NMR (100 MHz, Chloroform-*d*)  $\delta$  173.74, 163.73, 134.94, 133.76, 132.19, 131.78, 129.29, 128.67, 128.65, 128.64, 128.64, 128.63, 128.54, 128.53, 128.48, 128.15, 127.21, 126.31, 115.16, 83.78, 72.61, 57.18, 36.49, 21.55, 21.44. HRMS (ESI) calcd for  $\text{C}_{25}\text{H}_{25}\text{N}_2\text{O}_4\text{S}$   $m/z$   $[\text{M}+\text{H}]^+$ : 449.1535; found: 449.1530.  $[a]_D^{22} = -13.1$  (c 0.29,  $\text{CHCl}_3$ ); HPLC analysis: Chiralcel IE (Hex/IPA = 70/30, 1.0 mL/min, 190 nm, 22°C), 14.1 (major), 38.7 min, 90% ee.

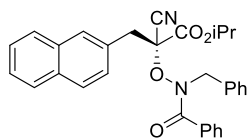

**isopropyl (R)-2-((N-benzylbenzamido)oxy)-2-cyano-3-(naphthalen-2-yl)propanoate (4p):** colorless oil; 74% yield;  $^1\text{H}$  NMR (400 MHz, Chloroform-*d*)  $\delta$  7.84 – 7.79 (m, 1H), 7.77 – 7.68 (m, 3H), 7.63 – 7.58 (m, 2H), 7.51 – 7.44 (m, 3H), 7.41 – 7.34 (m, 3H), 7.24 – 7.17 (m, 3H), 7.05 – 7.00 (m, 2H), 5.03 – 4.94 (m, 1H), 4.88 – 4.74 (m, 2H), 3.50 (q,  $J = 13.9$  Hz, 2H), 1.21 (d,  $J = 6.3$  Hz, 3H), 1.09 (d,  $J = 6.3$  Hz, 3H).  $^{13}\text{C}$  NMR (100 MHz, Chloroform-*d*)  $\delta$  173.82, 164.16, 134.89, 133.82, 133.26, 133.00, 131.75, 130.12, 128.97, 128.66, 128.66, 128.62, 128.61, 128.58,

128.57, 128.55, 128.53, 128.28, 128.26, 128.09, 128.02, 127.70, 126.37, 126.30, 115.32, 84.06, 72.43, 57.09, 42.31, 21.55, 21.39. HRMS (ESI) calcd for C<sub>31</sub>H<sub>29</sub>N<sub>2</sub>O<sub>4</sub> *m/z* [M+H]<sup>+</sup>: 493.2127; found: 493.2130. [α]<sub>D</sub><sup>22</sup> = -25.4 (c 1.09, CHCl<sub>3</sub>); HPLC analysis: Chiralcel IE (Hex/IPA = 80/20, 1.0 mL/min, 254 nm, 22°C), 23.5 (major), 55.9 min, 82% ee.

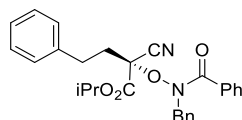

**isopropyl (R)-2-((N-benzylbenzamido)oxy)-2-cyano-4-phenylbutanoate (4q):** colorless oil; 77% yield; <sup>1</sup>H NMR (400 MHz, Chloroform-*d*) δ 7.67 – 7.59 (m, 2H), 7.54 – 7.47 (m, 1H), 7.47 – 7.39 (m, 2H), 7.33 – 7.24 (m, 5H), 7.24 – 7.17 (m, 3H), 7.17 – 7.08 (m, 2H), 5.12 – 5.01 (m, 1H), 4.96 (d, *J* = 5.1 Hz, 2H), 2.87 – 2.60 (m, 2H), 2.41 – 2.22 (m, 2H), 1.30 (d, *J* = 6.3 Hz, 6H). <sup>13</sup>C NMR (100 MHz, Chloroform-*d*) δ 173.92, 164.45, 139.28, 134.99, 133.84, 131.65, 128.63, 128.63, 128.60, 128.60, 128.59, 128.56, 128.56, 128.51, 128.51, 128.38, 128.38, 128.13, 128.13, 126.57, 115.23, 83.45, 72.32, 57.04, 38.04, 29.92, 21.51, 21.48. HRMS (ESI) calcd for C<sub>28</sub>H<sub>29</sub>N<sub>2</sub>O<sub>4</sub> *m/z* [M+H]<sup>+</sup>: 457.2127; found: 457.2137. [α]<sub>D</sub><sup>22</sup> = -10.5 (c 1.03, CHCl<sub>3</sub>); HPLC analysis: Chiralcel IE (Hex/IPA = 90/10, 1.0 mL/min, 254 nm, 22°C), 18.6 (major), 22.6 min, 88% ee.

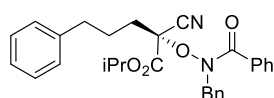

**isopropyl (R)-2-((N-benzylbenzamido)oxy)-2-cyano-5-phenylpentanoate (4r):** colorless oil; 88% yield; <sup>1</sup>H NMR (400 MHz, Chloroform-*d*) δ 7.62 – 7.56 (m, 2H), 7.50 – 7.43 (m, 1H), 7.43 – 7.36 (m, 2H), 7.30 – 7.23 (m, 5H), 7.23 – 7.14 (m, 3H), 7.13 – 7.06 (m, 2H), 5.10 – 4.99 (m, 1H), 4.99 – 4.85 (m, 2H), 2.61 (t, *J* = 7.5 Hz, 2H), 2.10 – 1.95 (m, 2H), 1.89 – 1.65 (m, 2H), 1.26 (d, *J* = 6.3 Hz, 6H). <sup>13</sup>C NMR (100 MHz, Chloroform-*d*) δ 173.95, 164.62, 140.74, 135.09, 133.89, 131.68, 128.65, 128.65, 128.65, 128.58, 128.58, 128.58, 128.56, 128.56, 128.55, 128.54, 128.44, 128.44, 128.16, 126.24, 115.42, 83.80, 72.25, 56.99, 35.79, 35.05, 25.27, 21.55, 21.55. HRMS (ESI) calcd for C<sub>29</sub>H<sub>31</sub>N<sub>2</sub>O<sub>4</sub> *m/z* [M+H]<sup>+</sup>: 471.2284; found: 471.2281. [α]<sub>D</sub><sup>22</sup> = -1.8 (c 1.47, CHCl<sub>3</sub>); HPLC analysis: Chiralcel IC (Hex/IPA = 85/15, 1.0 mL/min, 254 nm, 22°C), 11.3 (major), 12.7 min, 90% ee.

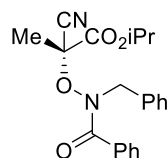

**isopropyl (R)-2-((N-benzylbenzamido)oxy)-2-cyanopropanoate (4s):** colorless oil; 82% yield; <sup>1</sup>H NMR (300 MHz, Chloroform-*d*) δ 7.70 – 7.64 (m, 2H), 7.59 – 7.51 (m, 1H), 7.47 (dd, *J* = 8.2, 6.5 Hz, 2H), 7.33 (dd, *J* = 5.1, 1.9 Hz, 3H), 7.25 (dd, *J* = 6.9, 2.9 Hz, 2H), 5.14 – 5.06 (m, 1H), 5.04 – 4.90 (m, 2H), 1.80 (s, 3H), 1.33 (dd, *J* = 6.3, 4.1 Hz, 6H). <sup>13</sup>C NMR (75 MHz, Chloroform-*d*) δ 173.79, 164.59, 135.01, 133.77, 131.64, 128.65, 128.65, 128.58, 128.58, 128.53, 128.53, 128.49, 128.49, 128.10, 116.02, 79.52, 72.26, 56.80, 23.10, 21.45, 21.41. HRMS (ESI) calcd for C<sub>21</sub>H<sub>23</sub>N<sub>2</sub>O<sub>4</sub> *m/z* [M+H]<sup>+</sup>:

367.1658; found: 367.1673.  $[\alpha]_D^{22} = -5.4$  (c 0.42, CHCl<sub>3</sub>); HPLC analysis: Chiralcel IC (Hex/IPA = 90/10, 1.0 mL/min, 254 nm, 22°C), 16.8 (major), 18.4 min, 83% ee.

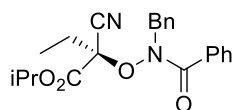

**isopropyl (R)-2-((N-benzylbenzamido)oxy)-2-cyanobutanoate (4t):** colorless oil; 96% yield; <sup>1</sup>H NMR (400 MHz, Chloroform-*d*) δ 7.62 (dd, *J* = 7.2, 1.7 Hz, 2H), 7.54 – 7.47 (m, 1H), 7.42 (t, *J* = 7.4 Hz, 2H), 7.33 – 7.25 (m, 3H), 7.24 – 7.16 (m, 2H), 5.14 – 5.02 (m, 1H), 5.01 – 4.85 (m, 2H), 2.08 (q, *J* = 7.4 Hz, 2H), 1.30 (dd, *J* = 6.3, 2.3 Hz, 6H), 1.04 (t, *J* = 7.4 Hz, 3H). <sup>13</sup>C NMR (100 MHz, Chloroform-*d*) δ 173.90, 164.66, 135.12, 135.12, 133.94, 131.66, 131.66, 128.69, 128.68, 128.68, 128.64, 128.57, 128.57, 128.14, 115.37, 84.70, 72.15, 56.94, 30.10, 21.58, 21.56, 8.18. HRMS (ESI) calcd for C<sub>22</sub>H<sub>25</sub>N<sub>2</sub>O<sub>4</sub> *m/z* [M+H]<sup>+</sup>: 381.1814; found: 381.1819.  $[\alpha]_D^{22} = -1.8$  (c 1.2, CHCl<sub>3</sub>); HPLC analysis: Chiralcel IC (Hex/IPA = 85/15, 1.0 mL/min, 254 nm, 22°C), 10.9 (major), 12.7 min, 92% ee.

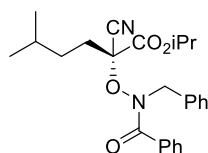

**isopropyl (R)-2-((N-benzylbenzamido)oxy)-2-cyano-5-methylhexanoate (4u):** colorless oil; 90% yield; <sup>1</sup>H NMR (300 MHz, Chloroform-*d*) δ 7.68 – 7.62 (m, 2H), 7.53 (d, *J* = 7.2 Hz, 1H), 7.46 (dd, *J* = 8.2, 6.5 Hz, 2H), 7.33 (dd, *J* = 5.3, 1.9 Hz, 3H), 7.24 (dd, *J* = 6.9, 2.8 Hz, 2H), 5.16 – 5.06 (m, 1H), 5.06 – 4.89 (m, 2H), 2.04 (dd, *J* = 9.5, 7.5 Hz, 2H), 1.58 – 1.51 (m, 1H), 1.44 – 1.37 (m, 1H), 1.33 (dd, *J* = 6.3, 2.1 Hz, 6H), 1.29 – 1.19 (m, 1H), 0.89 (d, *J* = 6.6 Hz, 6H). <sup>13</sup>C NMR (75 MHz, Chloroform-*d*) δ 173.75, 164.65, 135.13, 133.97, 131.49, 128.59, 128.59, 128.54, 128.54, 128.50, 128.50, 128.45, 128.44, 128.03, 115.42, 84.17, 72.04, 56.78, 34.45, 32.27, 27.73, 22.19, 22.14, 21.50, 21.46. HRMS (ESI) calcd for C<sub>25</sub>H<sub>31</sub>N<sub>2</sub>O<sub>4</sub> *m/z* [M+H]<sup>+</sup>: 423.2284; found: 423.2296.  $[\alpha]_D^{22} = -4.3$  (c 2.37, CHCl<sub>3</sub>); HPLC analysis: Chiralcel IE (Hex/IPA = 90/10, 1.0 mL/min, 254 nm, 22°C), 15.3 (major), 21.3 min, 92% ee.

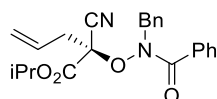

**isopropyl (R)-2-((N-benzylbenzamido)oxy)-2-cyanopent-4-enoate (4v):** colorless oil; 94% yield; <sup>1</sup>H NMR (400 MHz, Chloroform-*d*) δ 7.65 – 7.59 (m, 2H), 7.55 – 7.48 (m, 1H), 7.47 – 7.40 (m, 2H), 7.32 – 7.25 (m, 3H), 7.23 – 7.17 (m, 2H), 5.78 – 5.64 (m, 1H), 5.26 (d, *J* = 14.0 Hz, 2H), 5.11 – 5.02 (m, 1H), 5.00 – 4.86 (m, 2H), 2.82 – 2.75 (m, 2H), 1.28 (d, *J* = 6.3 Hz, 6H). <sup>13</sup>C NMR (100 MHz, Chloroform-*d*) δ 173.82, 164.04, 135.00, 133.83, 131.72, 128.69, 128.68, 128.64, 128.64, 128.61, 128.61, 128.19, 128.19, 128.16, 128.16, 122.31, 99.99, 83.28, 72.36, 57.04, 40.66, 21.59, 21.59. HRMS (ESI) calcd for C<sub>23</sub>H<sub>25</sub>N<sub>2</sub>O<sub>4</sub> *m/z* [M+H]<sup>+</sup>: 393.1814; found: 393.1875.  $[\alpha]_D^{22} = -0.7$  (c 1.18, CHCl<sub>3</sub>); HPLC analysis: Chiralcel IC (Hex/IPA = 85/15, 1.0 mL/min, 254 nm, 22°C), 10.4 (major), 11.6 min, 92% ee.

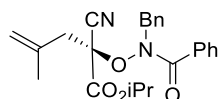

**isopropyl 2-((N-benzylbenzamido)oxy)-2-cyano-4-methylpent-4-enoate (4w):** colorless oil; 78% yield;  $^1\text{H}$  NMR (400 MHz, Chloroform-*d*)  $\delta$  7.65 – 7.59 (m, 2H), 7.53 – 7.47 (m, 1H), 7.42 (t,  $J$  = 7.4 Hz, 2H), 7.30 – 7.25 (m, 3H), 7.23 – 7.16 (m, 2H), 5.13 – 5.02 (m, 1H), 4.99 (d,  $J$  = 3.6 Hz, 1H), 4.94 (d,  $J$  = 9.1 Hz, 1H), 4.90 (d,  $J$  = 2.6 Hz, 1H), 2.75 (d,  $J$  = 4.6 Hz, 2H), 1.77 (s, 3H), 1.30 (dd,  $J$  = 6.4, 2.7 Hz, 6H).  $^{13}\text{C}$  NMR (100 MHz, Chloroform-*d*)  $\delta$  173.94, 164.31, 137.08, 135.13, 133.87, 131.73, 128.71, 128.71, 128.63, 128.62, 128.59, 128.59, 128.50, 128.50, 128.12, 117.98, 115.53, 99.96, 83.46, 72.35, 44.03, 23.42, 21.63, 21.56. HRMS (ESI) calcd for  $\text{C}_{24}\text{H}_{26}\text{N}_2\text{O}_4$   $m/z$   $[\text{M}+\text{H}]^+$ : 407.1971; found: 407.2003.  $[\alpha]_D^{22} = -5.6$  (c 0.62,  $\text{CHCl}_3$ ); HPLC analysis: Chiralcel IC (Hex/IPA = 85/15, 1.0 mL/min, 254 nm, 22°C), 9.3 (major), 10.3 min, 94% ee.

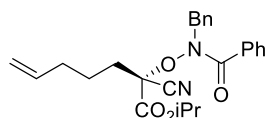

**isopropyl (R)-2-((N-benzylbenzamido)oxy)-2-cyanohept-6-enoate (4x):** colorless oil; 92% yield;  $^1\text{H}$  NMR (400 MHz, Chloroform-*d*)  $\delta$  7.64 – 7.58 (m, 2H), 7.54 – 7.47 (m, 1H), 7.46 – 7.39 (m, 2H), 7.33 – 7.27 (m, 3H), 7.23 – 7.17 (m, 2H), 5.78 – 5.63 (m, 1H), 5.11 – 5.04 (m, 1H), 5.03 – 4.98 (m, 1H), 4.98 – 4.94 (m, 2H), 4.93 – 4.86 (m, 2H), 2.08 – 1.99 (m, 4H), 1.58 – 1.39 (m, 1H), 1.29 (dd,  $J$  = 6.2, 1.4 Hz, 6H).  $^{13}\text{C}$  NMR (100 MHz, Chloroform-*d*)  $\delta$  173.95, 164.71, 137.07, 135.10, 135.10, 133.91, 131.68, 128.68, 128.67, 128.64, 128.58, 128.56, 128.56, 128.15, 115.86, 115.45, 100.01, 83.88, 72.22, 56.98, 35.76, 32.90, 22.85, 21.58, 21.54. HRMS (ESI) calcd for  $\text{C}_{25}\text{H}_{29}\text{N}_2\text{O}_4$   $m/z$   $[\text{M}+\text{H}]^+$ : 421.2127; found: 421.2133.  $[\alpha]_D^{22} = -1.6$  (c 1.46,  $\text{CHCl}_3$ ); HPLC analysis: Chiralcel IC (Hex/IPA = 85/15, 1.0 mL/min, 254 nm, 22°C), 9.4 (major), 10.7 min, 86% ee.

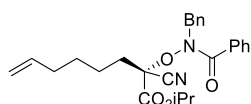

**isopropyl (R)-2-((N-benzylbenzamido)oxy)-2-cyano-oct-7-enoate (4y):** colorless oil; 89% yield;  $^1\text{H}$  NMR (400 MHz, Chloroform-*d*)  $\delta$  7.64 – 7.58 (m, 2H), 7.50 (t,  $J$  = 7.4 Hz, 1H), 7.43 (s, 1H), 7.32 – 7.26 (m, 4H), 7.20 (dd,  $J$  = 6.8, 2.5 Hz, 2H), 5.80 – 5.67 (m, 1H), 5.13 – 5.03 (m, 1H), 5.02 – 4.98 (m, 1H), 4.98 – 4.93 (m, 2H), 4.91 (s, 1H), 2.12 – 1.94 (m, 4H), 1.56 – 1.33 (m, 4H), 1.29 (d,  $J$  = 6.1 Hz, 6H).  $^{13}\text{C}$  NMR (100 MHz, Chloroform-*d*)  $\delta$  173.92, 164.71, 138.05, 135.11, 133.94, 131.66, 128.68, 128.68, 128.68, 128.64, 128.64, 128.58, 128.58, 128.58, 128.15, 115.49, 115.09, 83.93, 72.19, 56.95, 36.23, 33.23, 28.28, 23.11, 21.58, 21.54. HRMS (ESI) calcd for  $\text{C}_{26}\text{H}_{31}\text{N}_2\text{O}_4$   $m/z$   $[\text{M}+\text{H}]^+$ : 435.2284; found: 435.2295.  $[\alpha]_D^{22} = -1.8$  (c 1.26,  $\text{CHCl}_3$ ); HPLC analysis: Chiralcel IC (Hex/IPA = 85/15, 1.0 mL/min, 254 nm, 22°C), 9.2 (major), 10.4 min, 92% ee.

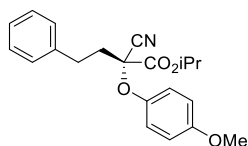

**isopropyl (R)-2-cyano-2-(4-methoxyphenoxy)-4-phenylbutanoate (6a):** colorless oil; 82% yield;  $^1\text{H NMR}$  (400 MHz, Chloroform-*d*)  $\delta$  7.38 – 7.28 (m, 2H), 7.28 – 7.20 (m, 3H), 7.12 – 6.99 (m, 2H), 6.89 – 6.78 (m, 2H), 5.15 – 5.01 (m, 1H), 3.78 (s, 3H), 3.14 – 2.98 (m, 1H), 2.98 – 2.83 (m, 1H), 2.62 – 2.37 (m, 2H), 1.27 (d,  $J = 6.3$  Hz, 3H), 1.22 (d,  $J = 6.3$  Hz, 3H).  $^{13}\text{C NMR}$  (100 MHz, Chloroform-*d*)  $\delta$  165.52, 156.40, 148.74, 139.53, 128.79, 128.79, 128.59, 128.59, 126.69, 119.98, 119.98, 116.07, 114.63, 114.62, 79.37, 72.06, 55.69, 40.60, 30.19, 21.56, 21.48. HRMS (ESI) calcd for  $\text{C}_{21}\text{H}_{24}\text{NO}_4$   $m/z$   $[\text{M}+\text{H}]^+$ : 354.1705; found: 354.1619.  $[\alpha]_D^{22} = +2.5$  (c 1.15,  $\text{CHCl}_3$ ); HPLC analysis: Chiralcel IG3 (Hex/IPA = 98/2, 1.0 mL/min, 254 nm, 22°C), 17.0, 17.8 (major) min, 90% ee.

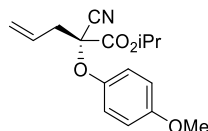

**isopropyl (R)-2-cyano-2-(4-methoxyphenoxy)pent-4-enoate (6b):** colorless oil; 80% yield;  $^1\text{H NMR}$  (400 MHz, Chloroform-*d*)  $\delta$  7.06 – 7.02 (m, 2H), 6.83 – 6.79 (m, 2H), 5.99 – 5.82 (m, 1H), 5.37 – 5.33 (m, 1H), 5.32 – 5.30 (m, 1H), 5.13 – 5.01 (m, 1H), 3.76 (s, 3H), 3.04 – 2.85 (m, 2H), 1.25 (d,  $J = 6.3$  Hz, 3H), 1.22 (d,  $J = 6.3$  Hz, 3H).  $^{13}\text{C NMR}$  (100 MHz, Chloroform-*d*)  $\delta$  165.05, 156.45, 148.64, 128.58, 122.13, 120.22, 120.21, 115.95, 114.60, 114.60, 79.38, 71.98, 55.67, 43.21, 43.21, 21.54. HRMS (ESI) calcd for  $\text{C}_{16}\text{H}_{20}\text{NO}_4$   $m/z$   $[\text{M}+\text{H}]^+$ : 290.1392; found: 290.1425.  $[\alpha]_D^{22} = +7.7$  (c 0.35,  $\text{CHCl}_3$ ); HPLC analysis: Chiralcel IG3 (Hex/IPA = 98/2, 1.0 mL/min, 254 nm, 22°C), 10.9 (major), 11.9 min, 84% ee.

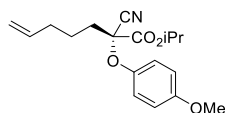

**isopropyl (R)-2-cyano-2-(4-methoxyphenoxy)hept-6-enoate (6c):** colorless oil; 79% yield;  $^1\text{H NMR}$  (400 MHz, Chloroform-*d*)  $\delta$  7.03 (d,  $J = 9.1$  Hz, 2H), 6.82 (d,  $J = 9.2$  Hz, 2H), 5.87 – 5.72 (m, 1H), 5.15 – 5.06 (m, 2H), 5.06 – 5.00 (m, 1H), 3.77 (s, 3H), 2.34 – 2.08 (m, 4H), 1.91 – 1.76 (m, 1H), 1.74 – 1.60 (m, 1H), 1.24 (dd,  $J = 17.6, 6.3$  Hz, 6H).  $^{13}\text{C NMR}$  (100 MHz, Chloroform-*d*)  $\delta$  165.57, 156.26, 148.73, 137.16, 119.86, 116.15, 115.77, 114.51, 114.51, 79.60, 71.75, 55.59, 38.21, 32.90, 22.89, 22.89, 21.47, 21.39. HRMS (ESI) calcd for  $\text{C}_{18}\text{H}_{24}\text{NO}_4$   $m/z$   $[\text{M}+\text{H}]^+$ : 318.1705; found: 318.1702.  $[\alpha]_D^{22} = +13.2$  (c 0.50,  $\text{CHCl}_3$ ); HPLC analysis: Chiralcel IG3 (Hex/IPA = 90/10, 1.0 mL/min, 254 nm, 22°C), 5.6 (major), 6.0 min, 88% ee.

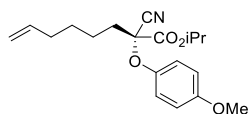

**isopropyl (R)-2-cyano-2-(4-methoxyphenoxy)oct-7-enoate (6d):** colorless oil; 78% yield;  $^1\text{H NMR}$  (400 MHz, Chloroform-*d*)  $\delta$  7.09 – 6.99 (m, 2H), 6.88 – 6.78 (m, 2H),



5.89 – 5.72 (m, 1H), 5.14 – 5.03 (m, 2H), 5.03 – 4.94 (m, 1H), 3.77 (s, 3H), 2.30 – 2.03 (m, 4H), 1.82 – 1.65 (m, 1H), 1.63 – 1.57 (m, 1H), 1.56 – 1.45 (m, 2H), 1.26 (d,  $J = 6.2$  Hz, 3H), 1.22 (d,  $J = 6.3$  Hz, 3H).  $^{13}\text{C}$  NMR (100 MHz, Chloroform-*d*)  $\delta$  165.60, 156.25, 148.72, 138.03, 119.86, 116.19, 115.03, 114.51, 114.51, 79.65, 71.72, 55.59, 38.68, 33.28, 28.27, 28.27, 23.12, 21.47, 21.38. HRMS (ESI) calcd for  $\text{C}_{19}\text{H}_{26}\text{NO}_4$   $m/z$   $[\text{M}+\text{H}]^+$ : 332.1862; found: 332.1874.  $[\alpha]_D^{22} = +10.4$  (c 0.24,  $\text{CHCl}_3$ ); HPLC analysis: Chiralcel IG3 (Hex/IPA = 98/2, 1.0 mL/min, 254 nm, 22°C), 10.8 (major), 11.8 min, 86% ee.

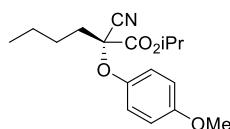

**isopropyl (R)-2-cyano-2-(4-methoxyphenoxy)hexanoate (6e)**: colorless oil; 75% yield;  $^1\text{H}$  NMR (400 MHz, Chloroform-*d*)  $\delta$  7.04 (d,  $J = 9.1$  Hz, 2H), 6.82 (d,  $J = 9.2$  Hz, 2H), 5.16 – 5.03 (m, 1H), 3.77 (s, 3H), 2.30 – 2.10 (m, 2H), 1.79 – 1.63 (m, 1H), 1.54 – 1.49 (m, 1H), 1.43 (q,  $J = 7.1$  Hz, 2H), 1.26 (d,  $J = 6.3$  Hz, 3H), 1.22 (d,  $J = 6.3$  Hz, 3H), 0.96 (t,  $J = 7.3$  Hz, 3H).  $^{13}\text{C}$  NMR (100 MHz, Chloroform-*d*)  $\delta$  165.66, 156.24, 119.89, 116.24, 114.51, 114.51, 79.75, 71.66, 55.59, 55.59, 38.58, 25.73, 25.73, 22.22, 21.46, 21.38, 13.72. HRMS (ESI) calcd for  $\text{C}_{17}\text{H}_{24}\text{NO}_4$   $m/z$   $[\text{M}+\text{H}]^+$ : 306.1705; found: 306.1714.  $[\alpha]_D^{22} = +2.4$  (c 0.75,  $\text{CHCl}_3$ ); HPLC analysis: Chiralcel IG3 (Hex/IPA = 98/2, 1.0 mL/min, 254 nm, 22°C), 9.2 (major), 10.4 min, 86% ee.

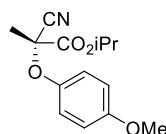

**isopropyl (R)-2-cyano-2-(4-methoxyphenoxy)propanoate (6f)**: colorless oil; 78% yield;  $^1\text{H}$  NMR (400 MHz, Chloroform-*d*)  $\delta$  7.05 (d,  $J = 9.1$  Hz, 2H), 6.83 (d,  $J = 9.1$  Hz, 2H), 5.20 – 5.01 (m, 1H), 3.78 (s, 3H), 1.96 (s, 3H), 1.27 (d,  $J = 6.3$  Hz, 3H), 1.23 (d,  $J = 6.3$  Hz, 3H).  $^{13}\text{C}$  NMR (100 MHz, Chloroform-*d*)  $\delta$  165.78, 156.43, 148.42, 120.33, 116.85, 114.53, 114.53, 75.64, 71.84, 55.59, 55.59, 25.69, 21.41, 21.32. HRMS (ESI) calcd for  $\text{C}_{14}\text{H}_{18}\text{NO}_4$   $m/z$   $[\text{M}+\text{H}]^+$ : 264.1236; found: 264.1294.  $[\alpha]_D^{22} = +3.1$  (c 1.02,  $\text{CHCl}_3$ ); HPLC analysis: Chiralcel OJH (Hex/IPA = 98/2, 1.0 mL/min, 254 nm, 22°C), 25.4, 32.8 (major) min, 80% ee.

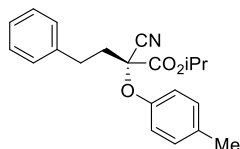

**isopropyl (R)-2-cyano-4-phenyl-2-(p-tolyloxy)butanoate (6g)**: colorless oil; 88% yield;  $^1\text{H}$  NMR (400 MHz, Chloroform-*d*)  $\delta$  7.36 – 7.28 (m, 2H), 7.25 – 7.16 (m, 4H), 6.94 – 6.83 (m, 3H), 5.14 – 5.06 (m, 1H), 3.14 – 3.01 (m, 1H), 2.98 – 2.85 (m, 1H), 2.61 – 2.40 (m, 2H), 2.34 (s, 3H), 1.28 (d,  $J = 2.6$  Hz, 3H), 1.19 (d,  $J = 6.1$  Hz, 3H).  $^{13}\text{C}$  NMR (100 MHz, Chloroform-*d*)  $\delta$  165.52, 154.89, 139.91, 139.52, 129.36, 129.36, 128.80, 128.80, 128.59, 128.59, 126.69, 124.67, 118.15, 114.07, 77.70, 72.10, 40.81, 30.18, 21.54, 21.54, 21.39. HRMS (ESI) calcd for  $\text{C}_{21}\text{H}_{24}\text{NO}_3$   $m/z$   $[\text{M}+\text{H}]^+$ : 338.1756;

found: 338.1792.  $[a]_D^{22} = +0.4$  (c 0.68, CHCl<sub>3</sub>); HPLC analysis: Chiralcel OJH (Hex/IPA = 95/5, 1.0 mL/min, 210 nm, 22°C), 10.5, 18.4 (major) min, 89% ee.

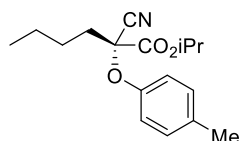

**isopropyl (R)-2-cyano-2-(p-tolyloxy)hexanoate (6h)**: colorless oil; 87% yield; <sup>1</sup>H NMR (400 MHz, Chloroform-*d*)  $\delta$  7.17 (t,  $J = 7.7$  Hz, 1H), 6.89 (d,  $J = 7.5$  Hz, 1H), 6.87 – 6.81 (m, 2H), 5.15 – 5.07 (m, 1H), 2.32 (s, 3H), 2.29 – 2.13 (m, 2H), 1.80 – 1.66 (m, 1H), 1.63 – 1.55 (m, 1H), 1.48 – 1.40 (m, 2H), 1.29 (d,  $J = 6.3$  Hz, 3H), 1.20 (d,  $J = 6.4$  Hz, 3H), 0.97 (t,  $J = 7.2$  Hz, 3H). <sup>13</sup>C NMR (100 MHz, Chloroform-*d*)  $\delta$  165.78, 154.96, 139.82, 129.30, 129.30, 124.49, 124.49, 118.07, 114.01, 114.01, 78.09, 71.82, 38.88, 25.79, 22.31, 21.40, 13.85. HRMS (ESI) calcd for C<sub>17</sub>H<sub>24</sub>NO<sub>3</sub>  $m/z$  [M+H]<sup>+</sup>: 290.1756; found: 290.1775.  $[a]_D^{22} = +67.1$  (c 0.12, CHCl<sub>3</sub>); HPLC analysis: Chiralcel OJH (Hex/IPA = 95/5, 1.0 mL/min, 215 nm, 22°C), 6.0, 12.9 (major) min, 89% ee.

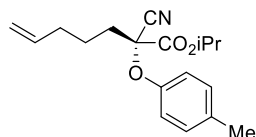

**isopropyl (R)-2-cyano-2-(p-tolyloxy)hept-6-enoate (6i)**: colorless oil; 83% yield; <sup>1</sup>H NMR (400 MHz, Chloroform-*d*)  $\delta$  7.17 (t,  $J = 7.7$  Hz, 1H), 6.92 – 6.87 (m, 1H), 6.86 – 6.80 (m, 2H), 5.88 – 5.72 (m, 1H), 5.15 – 5.07 (m, 1H), 5.07 – 5.00 (m, 2H), 2.32 (s, 3H), 2.27 – 2.15 (m, 4H), 1.92 – 1.80 (m, 1H), 1.75 – 1.64 (m, 1H), 1.29 (d,  $J = 6.3$  Hz, 3H), 1.19 (d,  $J = 6.2$  Hz, 3H). <sup>13</sup>C NMR (100 MHz, Chloroform-*d*)  $\delta$  165.69, 154.93, 139.84, 137.26, 129.31, 124.53, 118.06, 115.90, 114.00, 100.00, 77.96, 71.91, 38.49, 32.97, 30.28, 22.94, 21.53, 21.40. HRMS (ESI) calcd for C<sub>18</sub>H<sub>24</sub>NO<sub>3</sub>  $m/z$  [M+H]<sup>+</sup>: 302.1756; found: 302.1754.  $[a]_D^{22} = +2.2$  (c 0.50, CHCl<sub>3</sub>); HPLC analysis: Chiralcel OJH (Hex/IPA = 95/5, 1.0 mL/min, 210 nm, 22°C), 7.1, 15.3 (major) min, 86% ee.

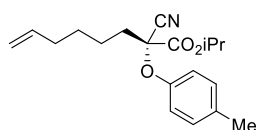

**isopropyl (R)-2-cyano-2-(p-tolyloxy)oct-7-enoate (6j)**: colorless oil; 78% yield; <sup>1</sup>H NMR (400 MHz, Chloroform-*d*)  $\delta$  7.18 (t,  $J = 7.8$  Hz, 1H), 6.89 (d,  $J = 7.5$  Hz, 1H), 6.87 – 6.81 (m, 2H), 5.87 – 5.74 (m, 1H), 5.15 – 5.07 (m, 1H), 5.07 – 4.95 (m, 2H), 2.32 (s, 3H), 2.28 – 2.16 (m, 2H), 2.12 (q,  $J = 7.0$  Hz, 2H), 1.82 – 1.70 (m, 1H), 1.66 – 1.59 (m, 1H), 1.54 – 1.48 (m, 2H), 1.29 (d,  $J = 1.4$  Hz, 3H), 1.20 (d,  $J = 1.4$  Hz, 3H). <sup>13</sup>C NMR (100 MHz, Chloroform-*d*)  $\delta$  165.71, 154.93, 139.83, 138.14, 129.30, 124.52, 118.08, 116.15, 115.14, 114.01, 100.00, 78.01, 71.87, 38.98, 33.38, 28.34, 23.19, 21.53, 21.39. HRMS (ESI) calcd for C<sub>19</sub>H<sub>26</sub>NO<sub>3</sub>  $m/z$  [M+H]<sup>+</sup>: 316.1913; found: 316.1902.  $[a]_D^{22} = +1.5$  (c 0.56, CHCl<sub>3</sub>); HPLC analysis: Chiralcel OJH (Hex/IPA = 95/5, 1.0 mL/min, 210 nm, 22°C), 6.5, 13.4 (major) min, 89% ee.

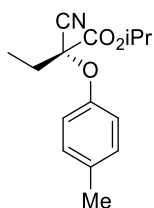

**isopropyl (R)-2-cyano-2-(p-tolyloxy)butanoate (6k):** colorless oil; 80% yield;  $^1\text{H}$  NMR (400 MHz, Chloroform-*d*)  $\delta$  7.17 (t,  $J = 7.7$  Hz, 1H), 6.88 (d,  $J = 7.7$  Hz, 1H), 6.86 – 6.80 (m, 2H), 5.15 – 5.07 (m, 1H), 2.31 (s, 3H), 2.30 – 2.18 (m, 2H), 1.33 – 1.23 (m, 6H), 1.20 (d,  $J = 31.9$  Hz, 3H).  $^{13}\text{C}$  NMR (100 MHz, Chloroform-*d*)  $\delta$  165.60, 155.01, 129.64, 129.64, 123.73, 123.73, 117.32, 117.32, 116.00, 78.78, 71.89, 32.83, 21.54, 21.39, 8.19. HRMS (ESI) calcd for  $\text{C}_{15}\text{H}_{20}\text{NO}_4$   $m/z$   $[\text{M}+\text{H}]^+$ : 262.1443; found: 262.1412.  $[\alpha]_D^{22} = +2.9$  (c 1.04,  $\text{CHCl}_3$ ); HPLC analysis: Chiralcel OJH (Hex/IPA = 95/5, 1.0 mL/min, 210 nm, 22°C), 8.8, 21.4 (major) min, 86% ee.

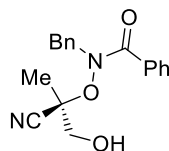

**(R)-N-benzyl-N-((2-cyano-1-hydroxypropan-2-yl)oxy)benzamide (7):** colorless oil; 80% yield;  $^1\text{H}$  NMR (400 MHz, Chloroform-*d*)  $\delta$  7.67 – 7.62 (m, 2H), 7.61 – 7.54 (m, 1H), 7.53 – 7.46 (m, 2H), 7.34 – 7.29 (m, 3H), 7.11 (dt,  $J = 6.1, 3.4$  Hz, 2H), 5.01 (q,  $J = 16.0$  Hz, 2H), 4.70 – 4.41 (m, 1H), 3.94 (dd,  $J = 12.9, 3.5$  Hz, 1H), 3.60 (dd,  $J = 12.9, 11.0$  Hz, 1H), 1.72 (s, 3H).  $^{13}\text{C}$  NMR (101 MHz, Chloroform-*d*)  $\delta$  175.90, 134.66, 133.29, 132.10, 129.40, 128.95, 128.78, 128.74, 128.68, 128.32, 128.22, 128.10, 128.07, 128.02, 118.46, 77.46, 77.14, 76.82, 66.66, 56.78, 20.39. HRMS (ESI) calcd for  $\text{C}_{18}\text{H}_{19}\text{N}_2\text{O}_3$   $m/z$   $[\text{M}+\text{H}]^+$ : 311.1390; found: 311.1382.

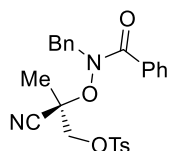

**(R)-2-((N-benzylbenzamido)oxy)-2-cyanopropyl 4-methylbenzenesulfonate (7-Ts):** colorless oil; 80% yield;  $^1\text{H}$  NMR (400 MHz, Chloroform-*d*)  $\delta$  7.80 – 7.72 (m, 2H), 7.61 – 7.54 (m, 2H), 7.54 – 7.48 (m, 1H), 7.44 (dd,  $J = 8.1, 6.8$  Hz, 2H), 7.34 (d,  $J = 8.2$  Hz, 2H), 7.30 (dp,  $J = 6.6, 2.0$  Hz, 3H), 7.15 (dd,  $J = 6.6, 2.9$  Hz, 2H), 4.97 (d,  $J = 16.0$  Hz, 1H), 4.88 (d,  $J = 15.7$  Hz, 1H), 4.15 (d,  $J = 10.3$  Hz, 1H), 4.09 (d,  $J = 10.4$  Hz, 1H), 2.47 (s, 3H), 1.60 (s, 3H).  $^{13}\text{C}$  NMR (101 MHz, Chloroform-*d*)  $\delta$  176.03, 173.76, 135.53, 133.84, 131.79, 131.13, 131.04, 128.88, 128.60, 128.29, 128.20, 127.96, 116.45, 116.22, 86.21, 77.35, 77.04, 76.72, 62.93, 58.72, 30.94, 22.15. HRMS (ESI) calcd for  $\text{C}_{25}\text{H}_{25}\text{N}_2\text{O}_5\text{S}$   $m/z$   $[\text{M}+\text{H}]^+$ : 465.1479; found: 465.1456.

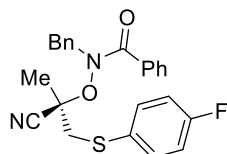

**(R)-N-benzyl-N-((2-cyano-1-((4-fluorophenyl)thio)propan-2-yl)oxy)benzamide**

**(8)**: colorless oil; 80% yield;  $^1\text{H}$  NMR (400 MHz, Chloroform-*d*)  $\delta$  7.61 – 7.52 (m, 2H), 7.52 – 7.45 (m, 1H), 7.45 – 7.34 (m, 4H), 7.33 – 7.22 (m, 3H), 7.23 – 7.09 (m, 2H), 7.05 – 6.88 (m, 2H), 5.01 (d,  $J = 13.5$  Hz, 2H), 3.27 (d,  $J = 14.2$  Hz, 1H), 3.14 (d,  $J = 14.2$  Hz, 1H), 1.62 (s, 3H).  $^{13}\text{C}$  NMR (101 MHz, Chloroform-*d*)  $\delta$  174.35, 163.75, 161.28, 135.20, 134.26, 134.18, 133.86, 131.70, 130.09, 130.05, 128.63, 128.60, 128.52, 128.43, 128.10, 118.94, 116.43, 116.21, 80.65, 77.38, 77.07, 76.75, 56.80, 43.94, 29.71, 23.64.  $^{19}\text{F}$  NMR (376 MHz, Chloroform-*d*)  $\delta$  -113.32, -113.34. HRMS (ESI) calcd for  $\text{C}_{24}\text{H}_{22}\text{FN}_2\text{O}_2\text{S}$   $m/z$   $[\text{M}+\text{H}]^+$ : 421.1381.; found: 421.1389.

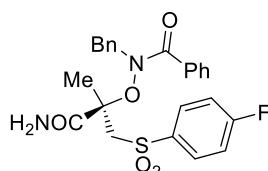

**(R)-N-((1-amino-3-((4-fluorophenyl)sulfonyl)-2-methyl-1-oxopropan-2-yl)oxy)-N-benzylbenzamide (8-amide)**: colorless oil; 80% yield;  $^1\text{H}$  NMR (400 MHz, Chloroform-*d*)  $\delta$  8.70 (s, 1H), 8.03 – 7.87 (m, 2H), 7.63 – 7.57 (m, 2H), 7.57 – 7.52 (m, 1H), 7.52 – 7.41 (m, 2H), 7.36 – 7.30 (m, 3H), 7.25 (dd,  $J = 7.3, 2.3$  Hz, 2H), 7.23 – 7.17 (m, 2H), 5.68 – 5.46 (m, 1H), 5.19 (d,  $J = 16.1$  Hz, 1H), 4.90 (d,  $J = 16.1$  Hz, 1H), 4.07 (d,  $J = 14.6$  Hz, 1H), 3.54 (d,  $J = 14.6$  Hz, 1H), 2.19 (s, 3H).  $^{13}\text{C}$  NMR (101 MHz, Chloroform-*d*)  $\delta$  176.03, 173.76, 135.53, 133.84, 131.79, 131.13, 131.04, 128.88, 128.60, 128.29, 128.20, 127.96, 116.45, 116.22, 86.21, 77.36, 77.04, 76.72, 62.94, 58.71, 22.16.  $^{19}\text{F}$  NMR (376 MHz, Chloroform-*d*)  $\delta$  -108.78, -108.80. HRMS (ESI) calcd for  $\text{C}_{24}\text{H}_{24}\text{FN}_2\text{O}_5\text{S}$   $m/z$   $[\text{M}+\text{H}]^+$ : 471.1384; found: 471.1399.

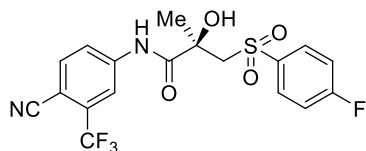

**(R)-N-(4-cyano-3-(trifluoromethyl)phenyl)-3-((4-fluorophenyl)sulfonyl)-2-hydroxy-2-methylpropanamide ((R)-Bicalutamide)**: white solid; 78% yield; M.P.: 176-178 °C  $^1\text{H}$  NMR (400 MHz, DMSO-*d*<sub>6</sub>):  $\delta$  10.35 (s, 1H), 8.43 (s, 1H), 8.20 (d,  $J = 8.5$  Hz, 1H), 8.06 (d,  $J = 8.5$  Hz, 1H), 7.94–7.90 (t, 2H), 7.36–7.30 (m, 2H), 6.39 (s, 1H), 3.95 (d,  $J = 14.7$  Hz, 1H), 3.71 (d,  $J = 14.7$  Hz, 1H), 1.41 (s, 3H).  $^{13}\text{C}$  NMR (100 MHz, DMSO-*d*<sub>6</sub>):  $\delta$  173.9, 165.6, 164.1, 143.2, 137.2, 137.2, 136.3, 131.9, 131.6, 131.4, 131.2, 125.3, 123.4, 122.9, 122.8, 121.6, 119.8, 117.6, 116.1, 115.9, 115.8, 102.0, 73.1, 63.5, 27.2.  $^{19}\text{F}$  NMR (377 MHz, Chloroform-*d*)  $\delta$  -62.50, -102.82, -103.40. HRMS (ESI) calcd for  $\text{C}_{18}\text{H}_{15}\text{F}_4\text{N}_2\text{O}_4\text{S}$   $m/z$   $[\text{M}+\text{H}]^+$ : 431.0683; found: 431.0672.  $[\alpha]_D^{22} = +7.9$  (c 1.04,  $\text{CHCl}_3$ ); HPLC analysis: Chiralcel OJH (Hex/IPA = 75/25, 1.0 mL/min, 210 nm, 22 °C), 16.6 (major), 19.9 min, 82% ee.

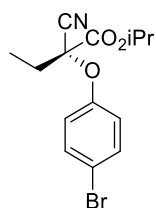

**isopropyl (R)-2-(4-bromophenoxy)-2-cyanobutanoate (6l):** colorless oil; 65% yield; <sup>1</sup>H NMR (400 MHz, Chloroform-*d*) δ 7.49 – 7.32 (m, 2H), 7.02 – 6.82 (m, 2H), 5.23 – 4.97 (m, 1H), 2.39 – 2.07 (m, 2H), 1.29 (d, *J* = 6.3 Hz, 3H), 1.23 – 1.20 (m, 3H). <sup>13</sup>C NMR (100 MHz, Chloroform-*d*) δ 165.14, 154.03, 132.51, 119.17, 116.42, 115.58, 78.83, 77.36, 77.04, 76.73, 72.13, 32.70, 21.48, 21.37, 8.09. HRMS (ESI) calcd for C<sub>14</sub>H<sub>17</sub>BrNO<sub>3</sub> *m/z* [M+H]<sup>+</sup>: 326.0386; found: 326.0389. [α]<sub>D</sub><sup>22</sup> = +2.2 (c 0.94, CHCl<sub>3</sub>); HPLC analysis: Chiralcel IG3 (Hex/IPA = 99/1, 1.0 mL/min, 215 nm, 22°C), 15.0, 16.1 (major) min, 84% ee.

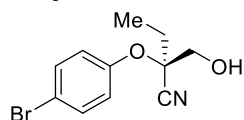

**(R)-2-(4-bromophenoxy)-2-(hydroxymethyl)butanenitrile (11):** colorless oil; 87% yield; <sup>1</sup>H NMR (400 MHz, Chloroform-*d*) δ 7.56 – 7.39 (m, 2H), 7.24 – 6.91 (m, 2H), 3.92 (q, *J* = 12.0 Hz, 2H), 2.02 (q, *J* = 7.5 Hz, 2H), 1.12 (t, *J* = 7.5 Hz, 3H). <sup>13</sup>C NMR (101 MHz, Chloroform-*d*) δ 153.05, 132.74, 123.50, 118.01, 80.95, 77.39, 77.07, 76.76, 64.92, 27.18, 8.18. HRMS (ESI) calcd for C<sub>11</sub>H<sub>13</sub>BrNO<sub>2</sub> *m/z* [M+H]<sup>+</sup>: 270.0124; found: 270.0118.

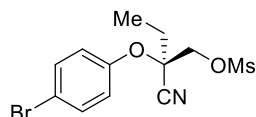

**(R)-2-(4-bromophenoxy)-2-cyanobutyl methanesulfonate (11-Ms):** colorless oil; 90% yield; <sup>1</sup>H NMR (400 MHz, Chloroform-*d*) δ 7.70 – 7.37 (m, 2H), 7.18 – 6.92 (m, 2H), 2.14 (dd, *J* = 13.9, 7.3 Hz, 1H), 2.08 – 1.87 (m, 1H), 1.72 (s, 3H), 1.32 – 1.18 (m, 3H). <sup>13</sup>C NMR (101 MHz, Chloroform-*d*) δ 167.85, 149.20, 132.72, 122.84, 119.80, 119.29, 117.21, 77.36, 77.05, 76.73, 44.83, 31.81, 29.71, 22.89, 9.76. HRMS (ESI) calcd for C<sub>12</sub>H<sub>15</sub>BrNO<sub>4</sub>S *m/z* [M+H]<sup>+</sup>: 347.9900; found: 347.9912.

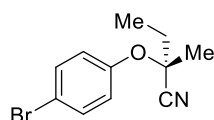

**(R)-2-(4-bromophenoxy)-2-methylbutanenitrile (12):** colorless oil; 77% yield; <sup>1</sup>H NMR (400 MHz, Chloroform-*d*) δ 7.62 – 7.43 (m, 2H), 7.11 – 6.95 (m, 2H), 2.14 (dd, *J* = 13.9, 7.3 Hz, 1H), 1.97 (dd, *J* = 13.8, 7.5 Hz, 1H), 1.72 (s, 3H), 1.19 (t, *J* = 7.4 Hz, 3H). <sup>13</sup>C NMR (101 MHz, Chloroform-*d*) δ 149.20, 132.72, 122.84, 119.80, 119.29, 77.36, 77.05, 76.73, 44.83, 31.81, 29.71, 22.89, 9.76. HRMS (ESI) calcd for C<sub>11</sub>H<sub>13</sub>BrNO *m/z* [M+H]<sup>+</sup>: 254.0175; found: 254.0165.

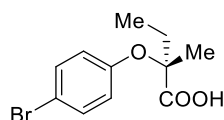

**(R)-2-(4-bromophenoxy)-2-methylbutanoic acid (13):** colorless pelle; <sup>1</sup>H NMR (400 MHz, Chloroform-*d*) δ 11.9 (b, 1H), δ 7.64 – 7.50 (m, 2H), 7.12 – 6.93 (m, 2H), 2.05 (q, *J* = 7.6 Hz, 2H), 1.57 (s, 3H), 0.95 (t, *J* = 7.5 Hz, 3H). <sup>13</sup>C NMR (101 MHz, Chloroform-*d*) δ 171.54, 149.60, 133.40, 132.57, 123.39, 123.13, 119.10, 55.43, 51.64, 29.66, 22.43, 9.77. HRMS (ESI) calcd for C<sub>11</sub>H<sub>14</sub>BrO<sub>3</sub> *m/z* [M+H]<sup>+</sup>: 273.0121; found: 273.0110.

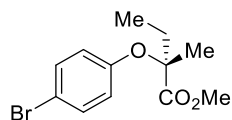

**(R)-2-(4-bromophenoxy)-2-cyanobutyl methanesulfonate (13-Me):** colorless oil;  $^1\text{H}$  NMR (400 MHz, Chloroform-*d*)  $\delta$  7.65 – 7.37 (m, 2H), 7.06 – 6.78 (m, 2H), 3.79 (s, 3H), 2.03 (q,  $J = 7.6$  Hz, 2H), 1.53 (s, 3H), 0.97 (t,  $J = 7.5$  Hz, 3H).  $^{13}\text{C}$  NMR (101 MHz, Chloroform-*d*) 170.61, 149.68, 132.50, 132.47, 123.39, 123.13, 119.10, 77.38, 77.06, 76.74, 54.43, 52.64, 28.66, 19.43, 8.77. HRMS (ESI) calcd for  $\text{C}_{12}\text{H}_{16}\text{BrO}_3$   $m/z$   $[\text{M}+\text{H}]^+$ : 287.0277; found: 287.0270.  $[\alpha]_D^{22} = +4.2$  (c 0.34,  $\text{CHCl}_3$ ); HPLC analysis: Chiralcel OJH (Hex/IPA = 99/1, 1.0 mL/min, 210 nm, 22°C), 12.1, 23.5 (major) min, 82% ee.

## 11. Determination of the Absolute Configuration by X-ray Crystallography

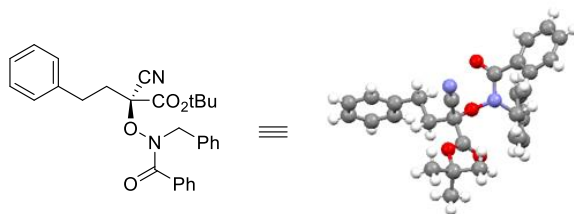

Figure 10.1 X-ray Crystallography of modified **4r** (CDCC 2044133)

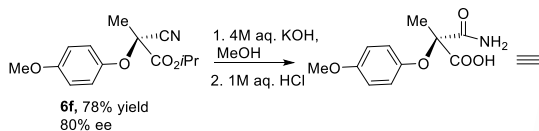

Figure 10.2 X-ray Crystallography of hydrolysis of **6f** (CCDC 2059577)

12. NMR spectra

**Methyl 2-bromo-2-cyano-3-phenylpropanoate (1a)**

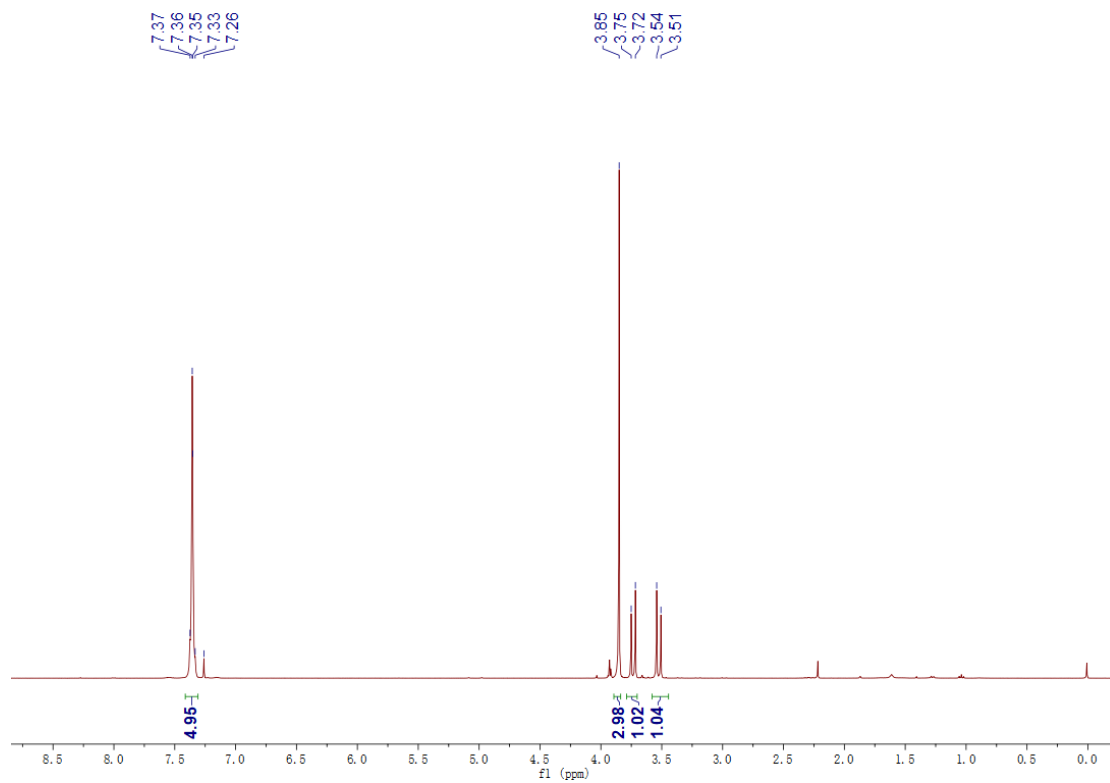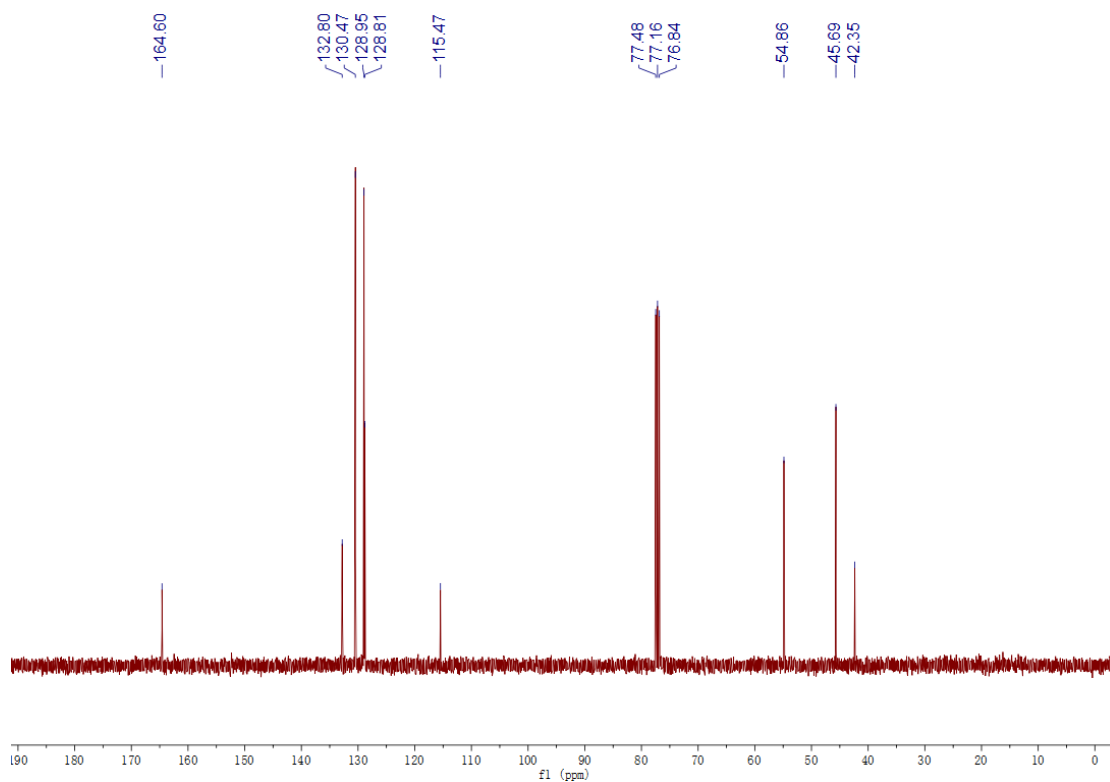

# Ethyl 2-bromo-2-cyano-3-phenylpropanoate (1b)

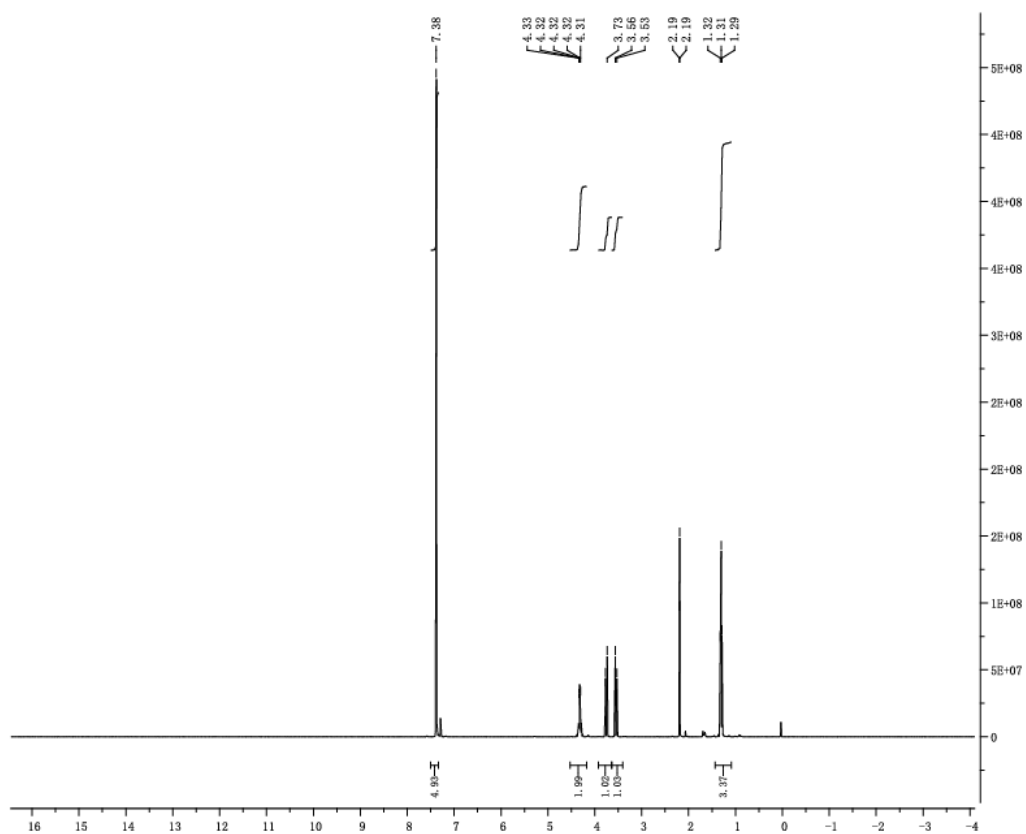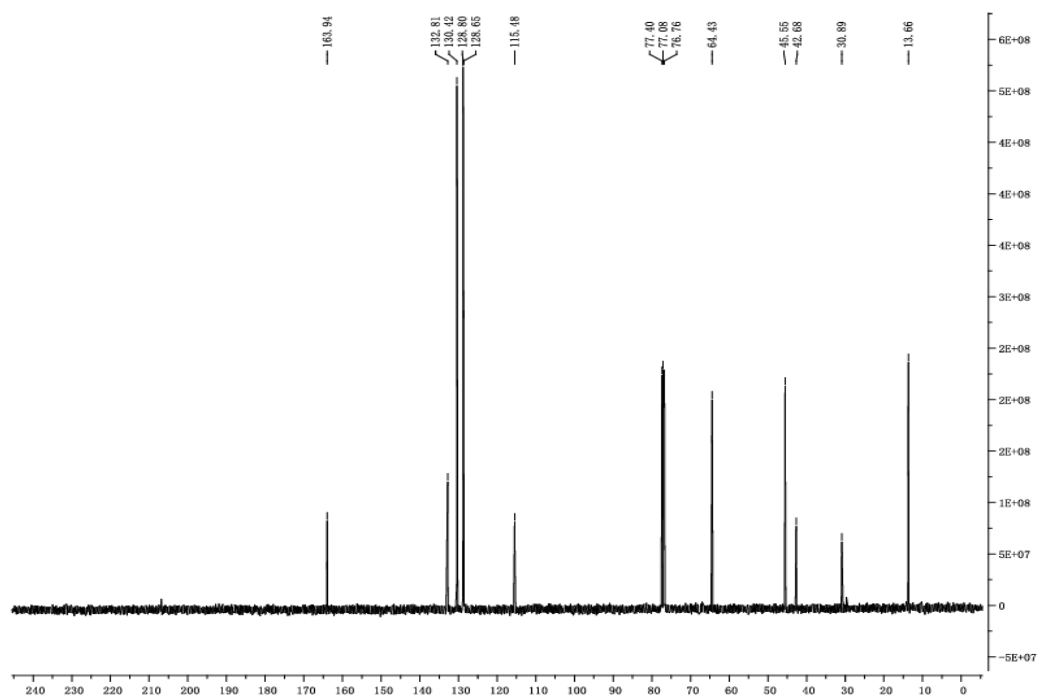



# Isopropyl 2-cyano-2-bromo-3-phenylpropanoate (1c)

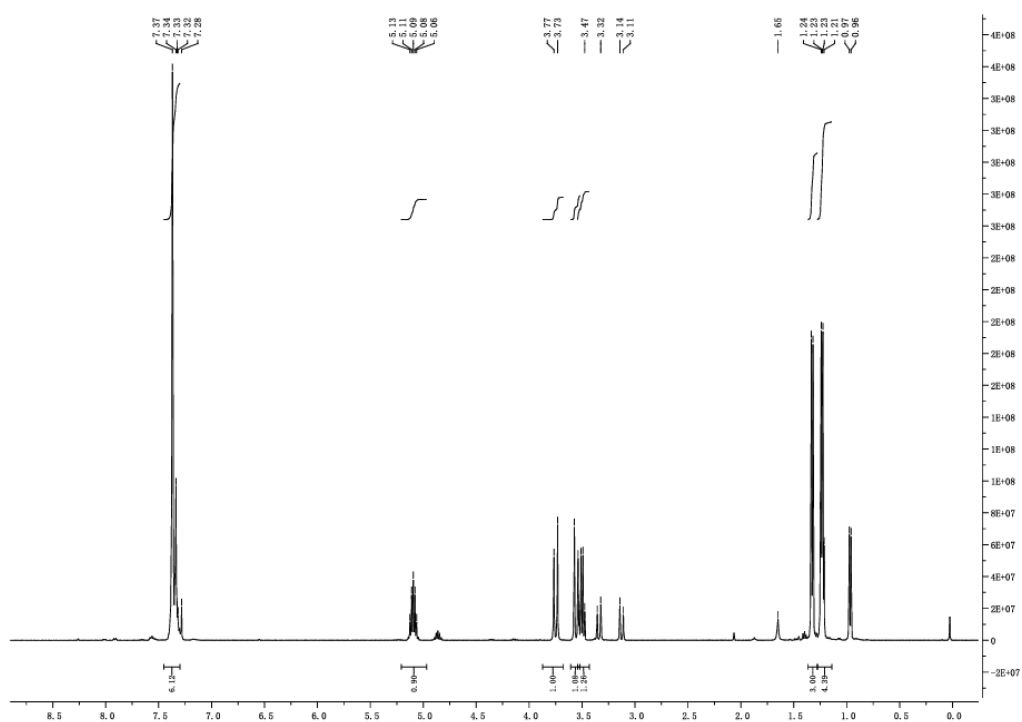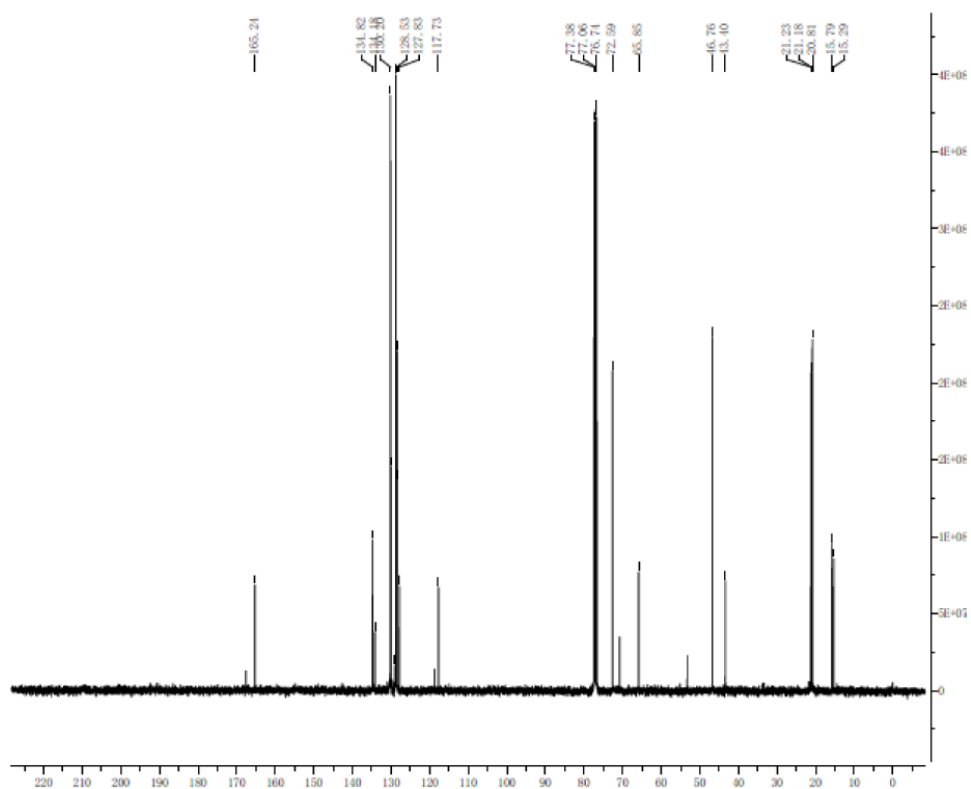

# tert-Butyl 2-bromo-2-cyano-3-phenylpropanoate (1d)

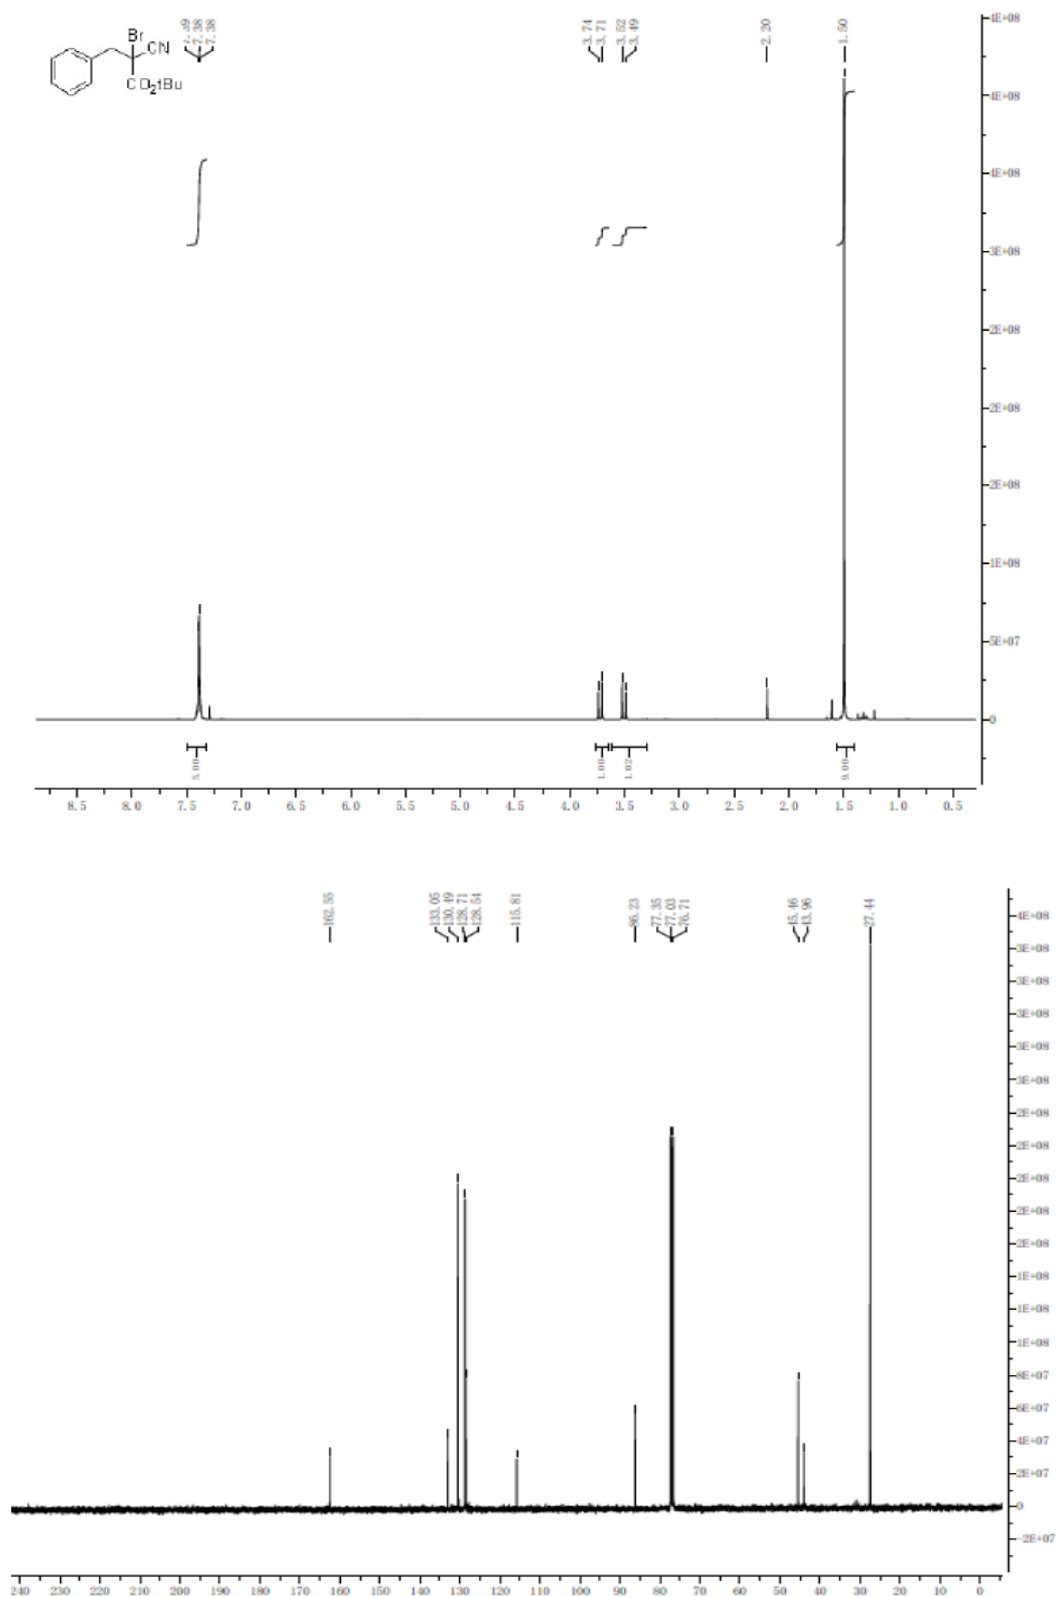

# Isopropyl 2-bromo-2-cyano-3-(4-fluorophenyl)propanoate (1e)

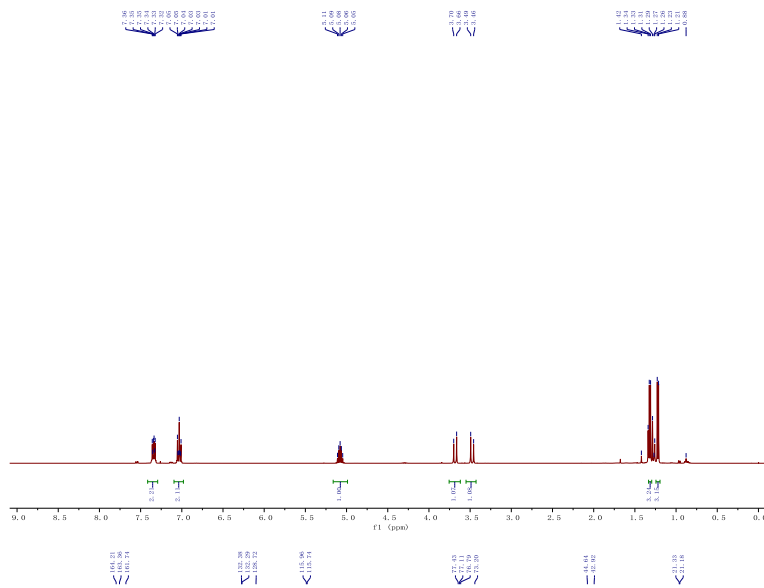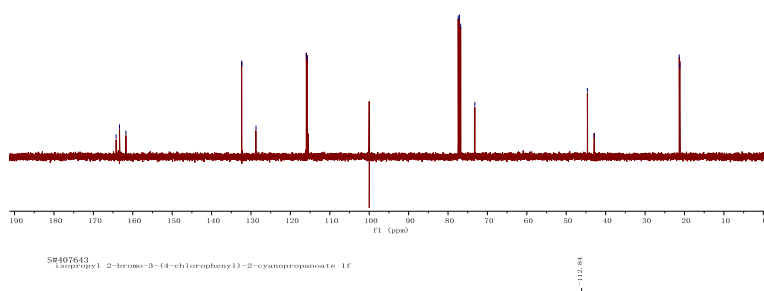

S8407643  
Isopropyl 2-bromo-3-(4-chlorophenyl)-2-cyanopropanoate 1f

112.84

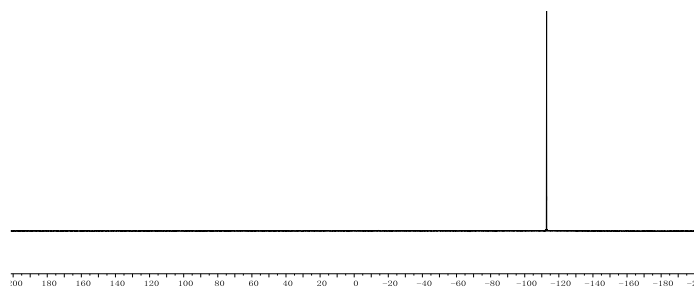

# Isopropyl 2-bromo-3-(4-bromophenyl)-2-cyanopropanoate (1f)

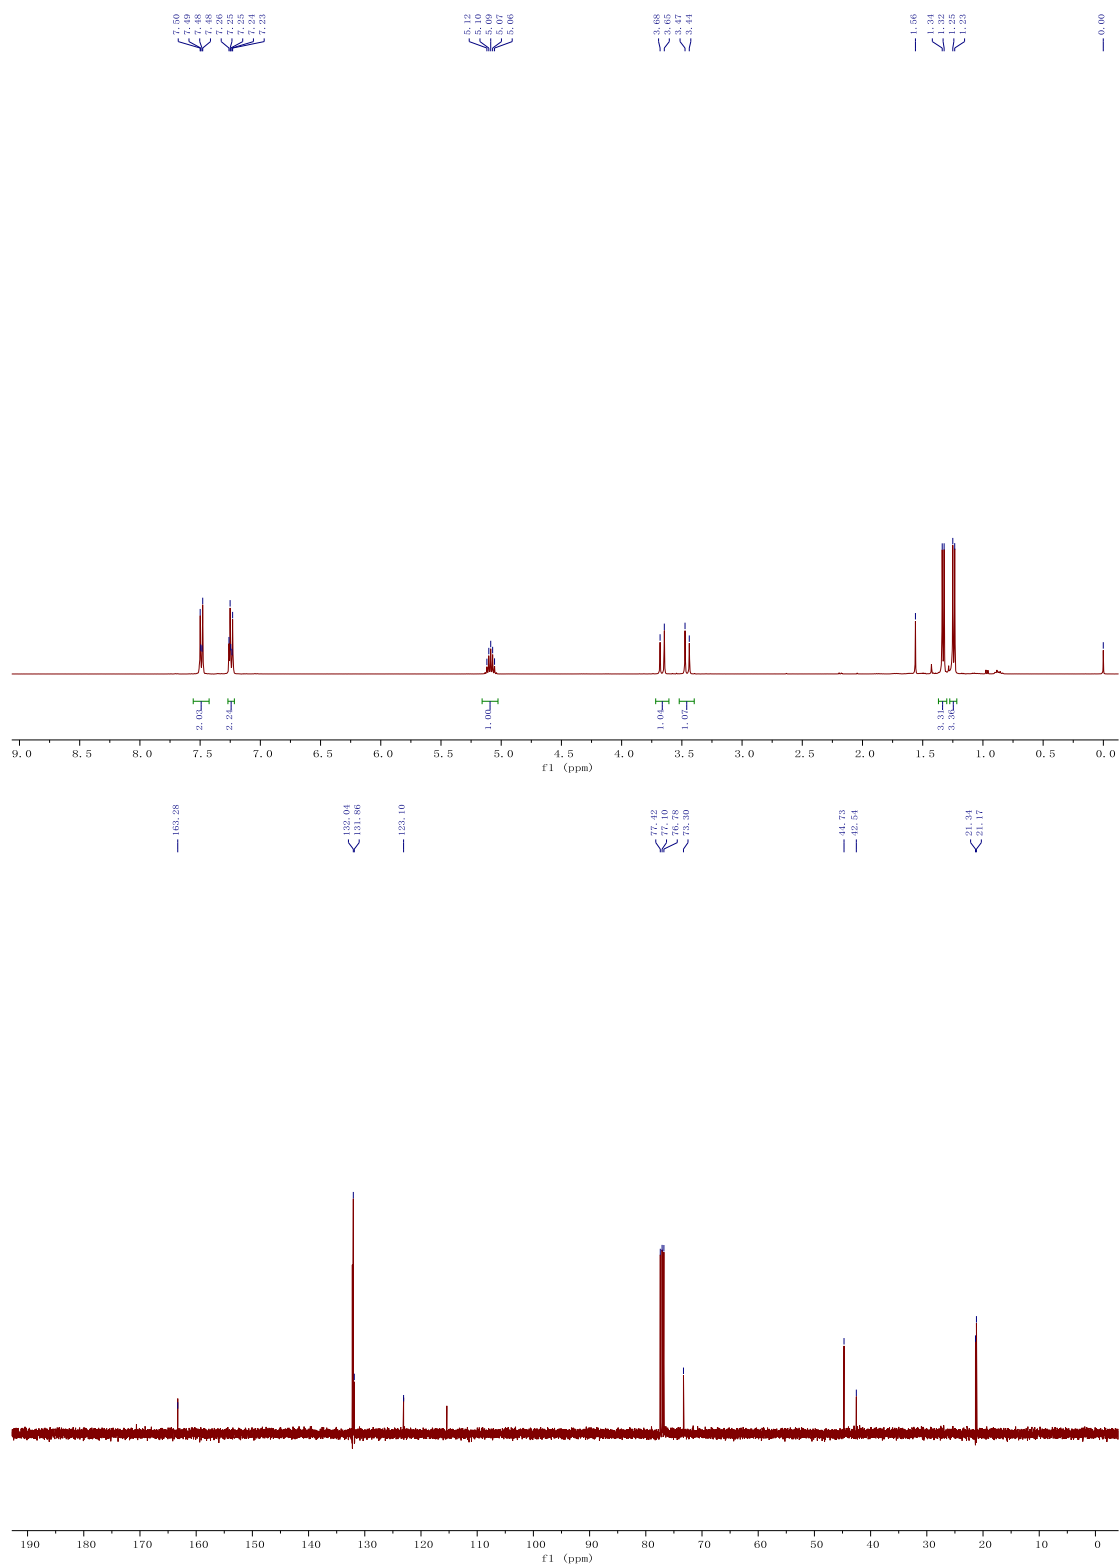

# Isopropyl 2-bromo-2-cyano-3-(2-iodophenyl)propanoate (1g)

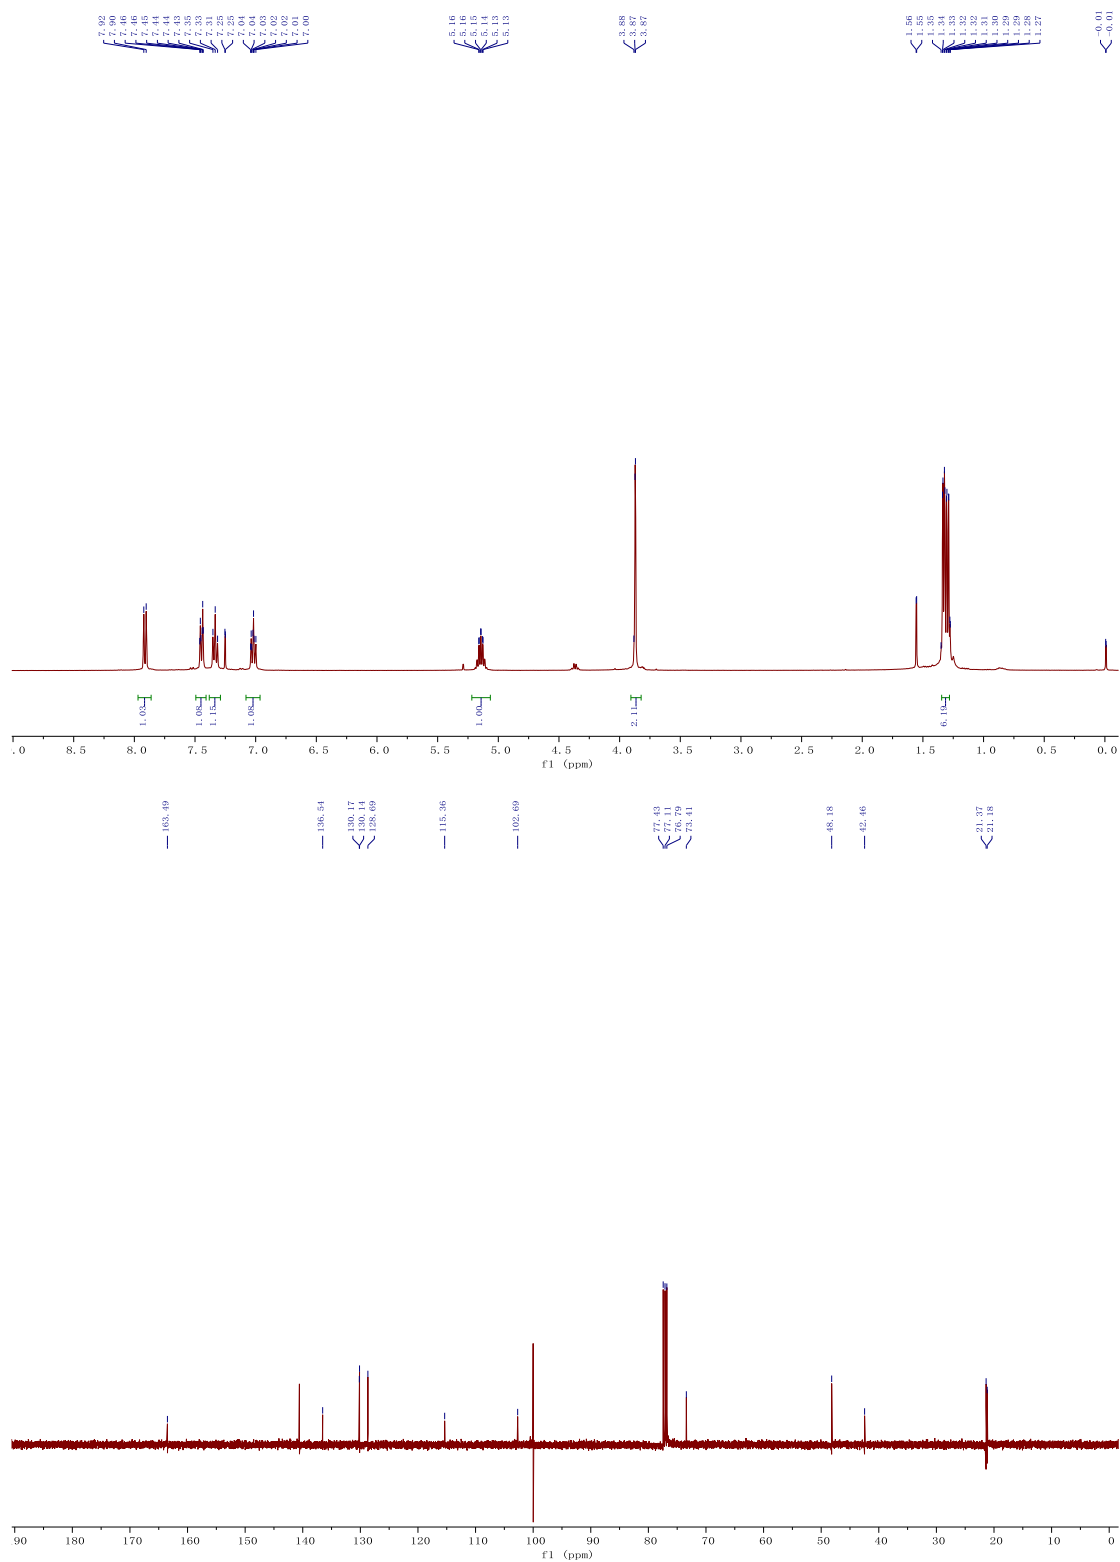

# Isopropyl 2-bromo-2-cyano-3-(4-nitrophenyl)propanoate (1h)

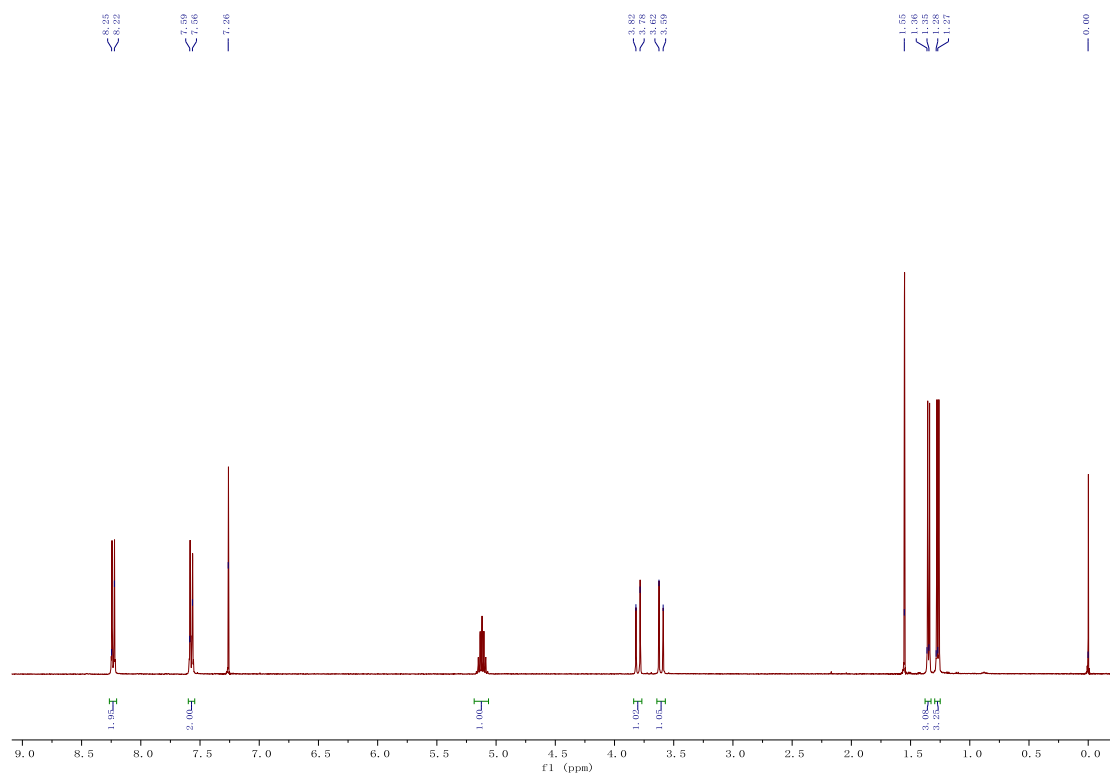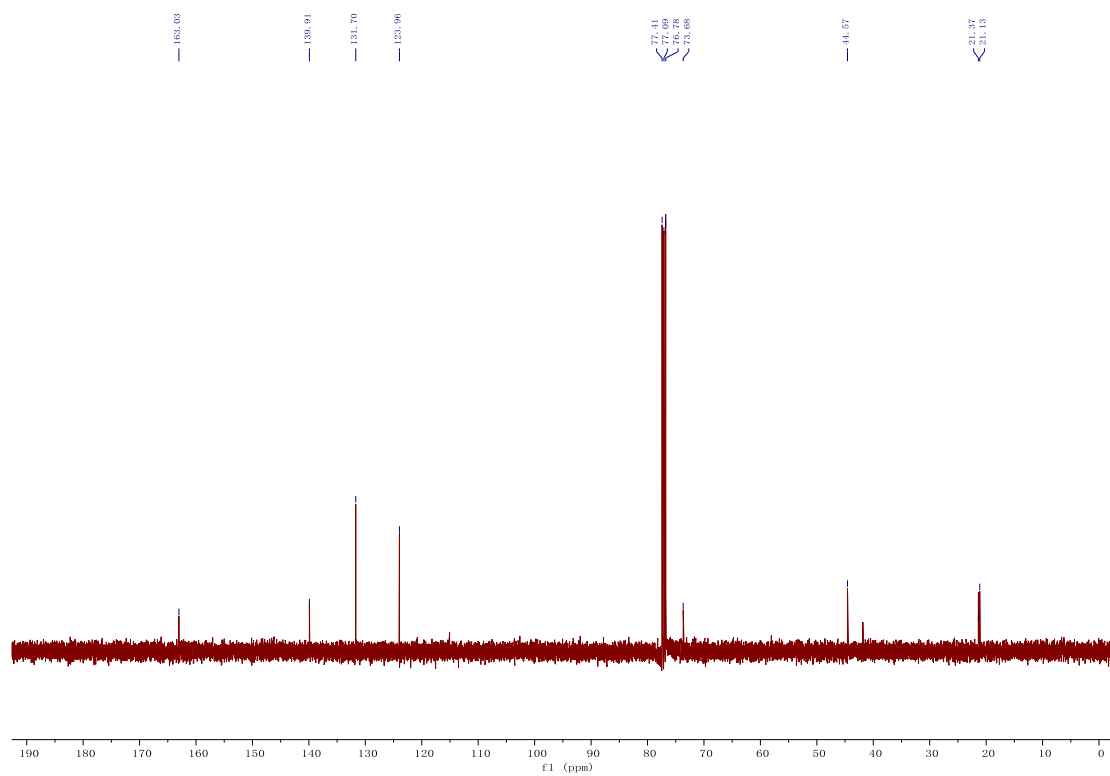

# Isopropyl 2-bromo-2-cyano-3-(4-methoxyphenyl)propanoate (1i)

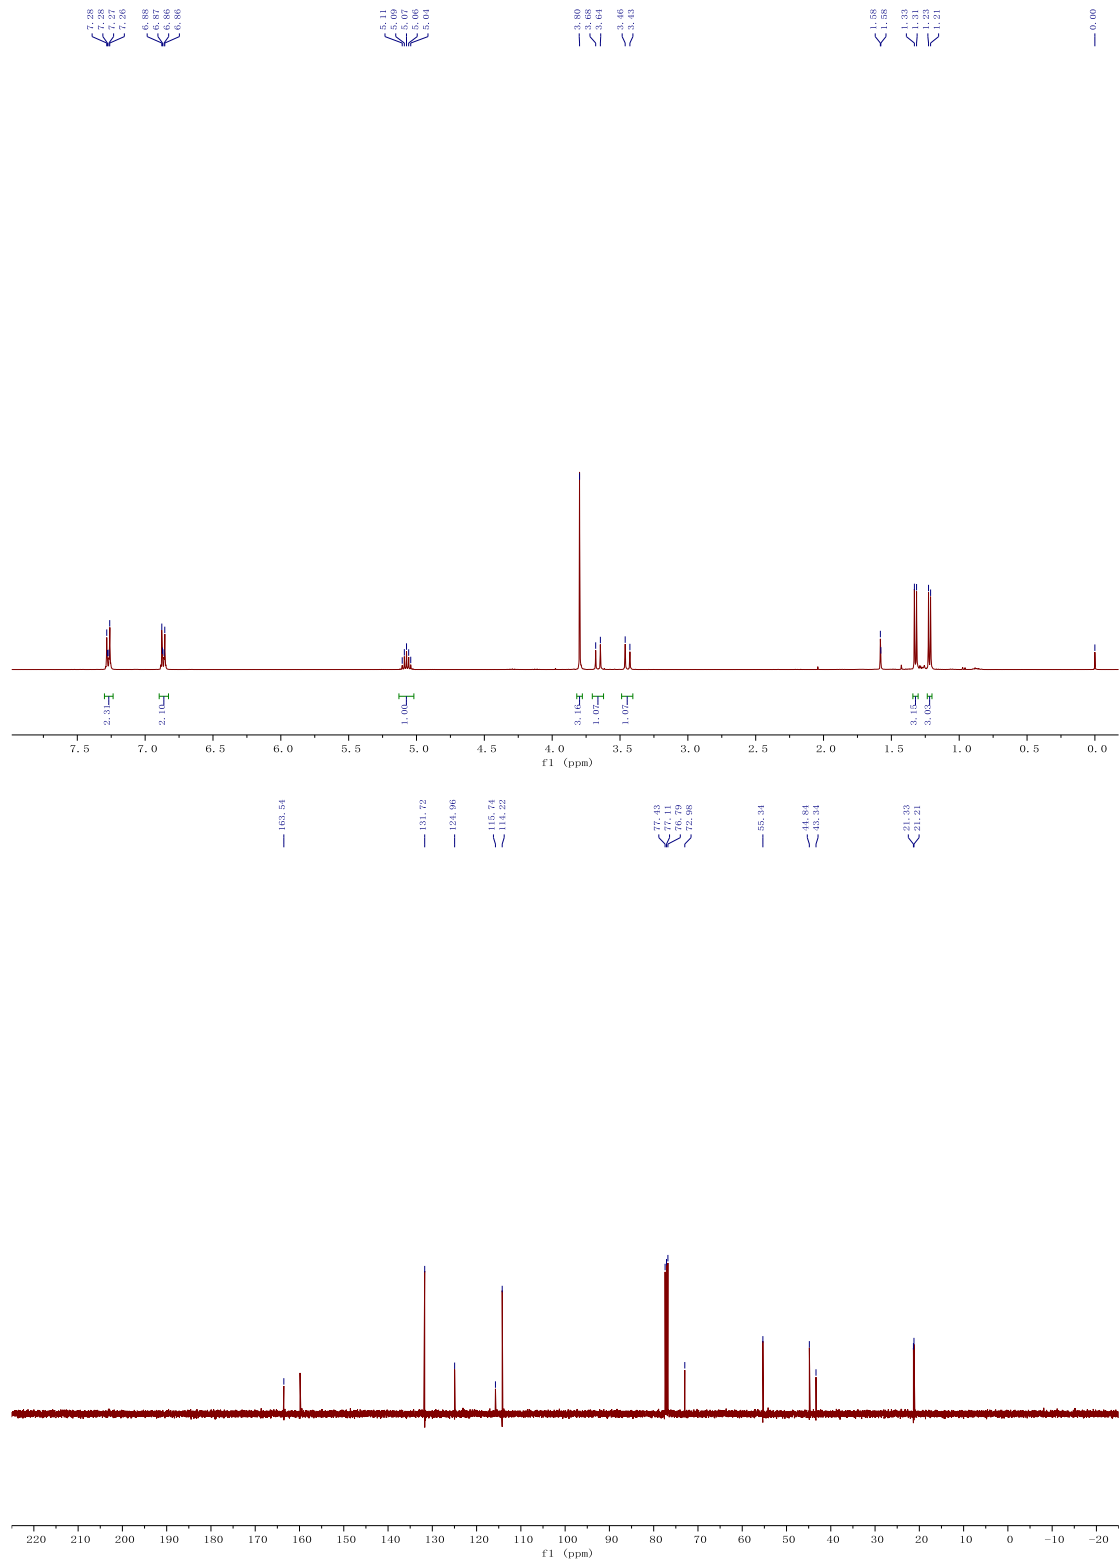

# Isopropyl 2-bromo-2-cyano-3-(o-tolyl)propanoate (1j)

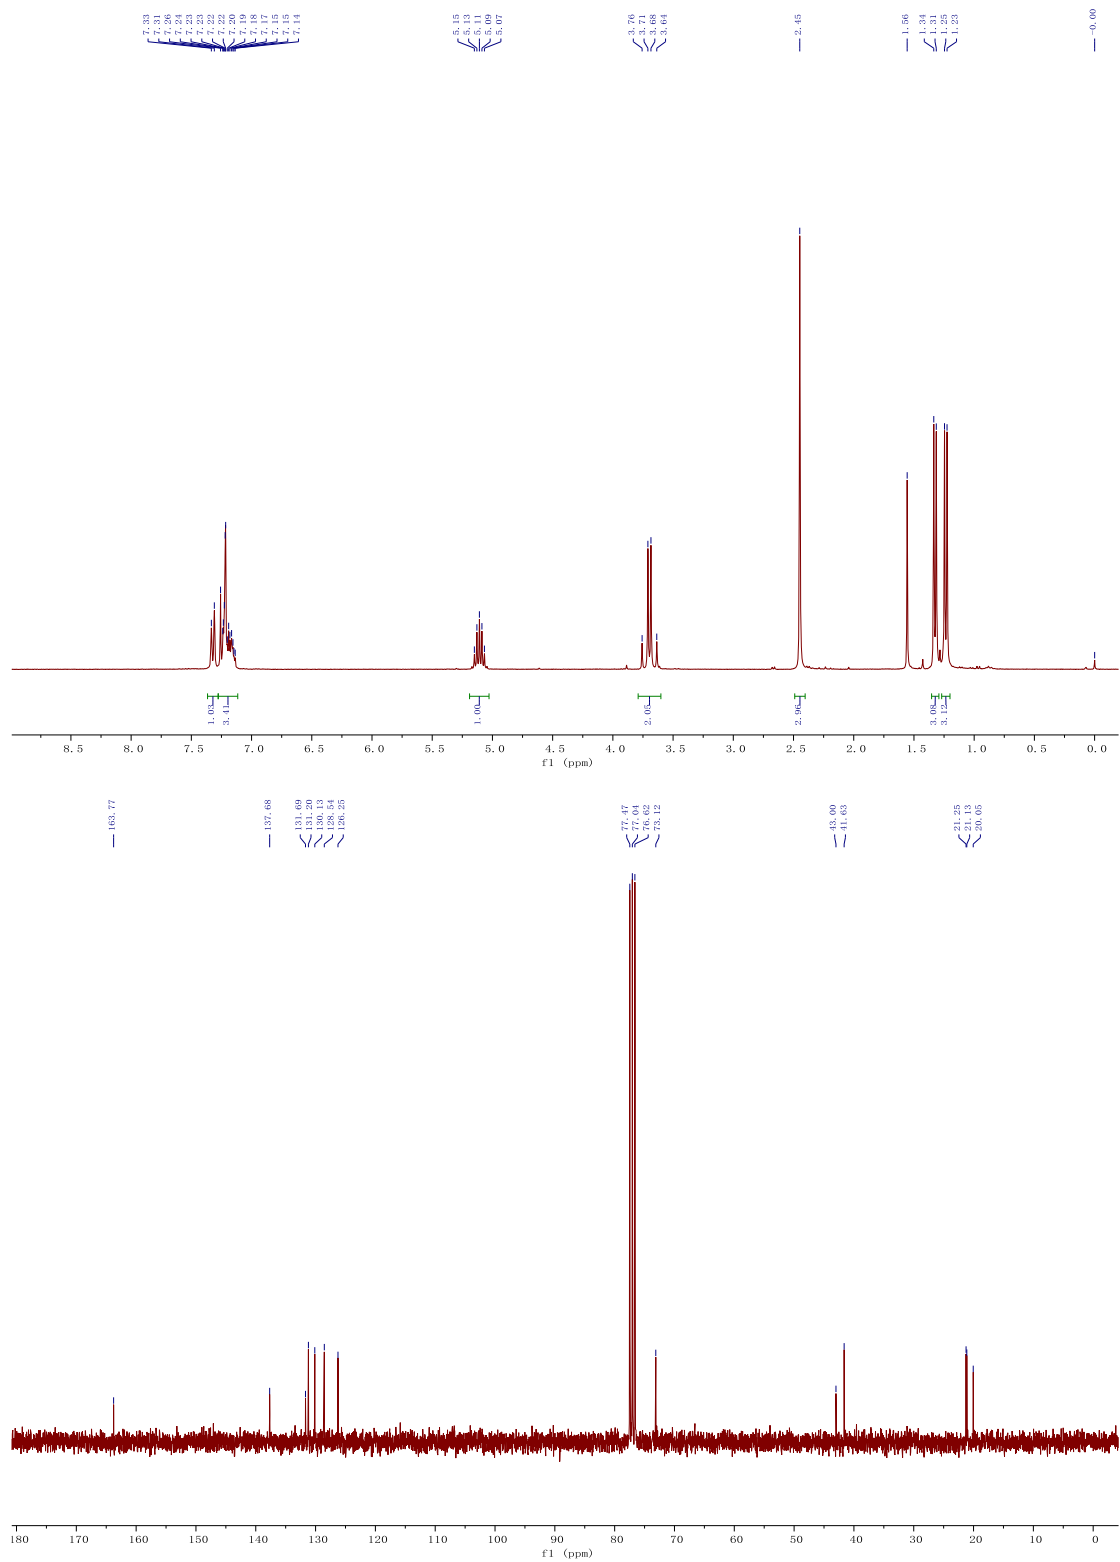



# Isopropyl 2-bromo-2-cyano-3-(thiophen-2-yl)propanoate (1k)

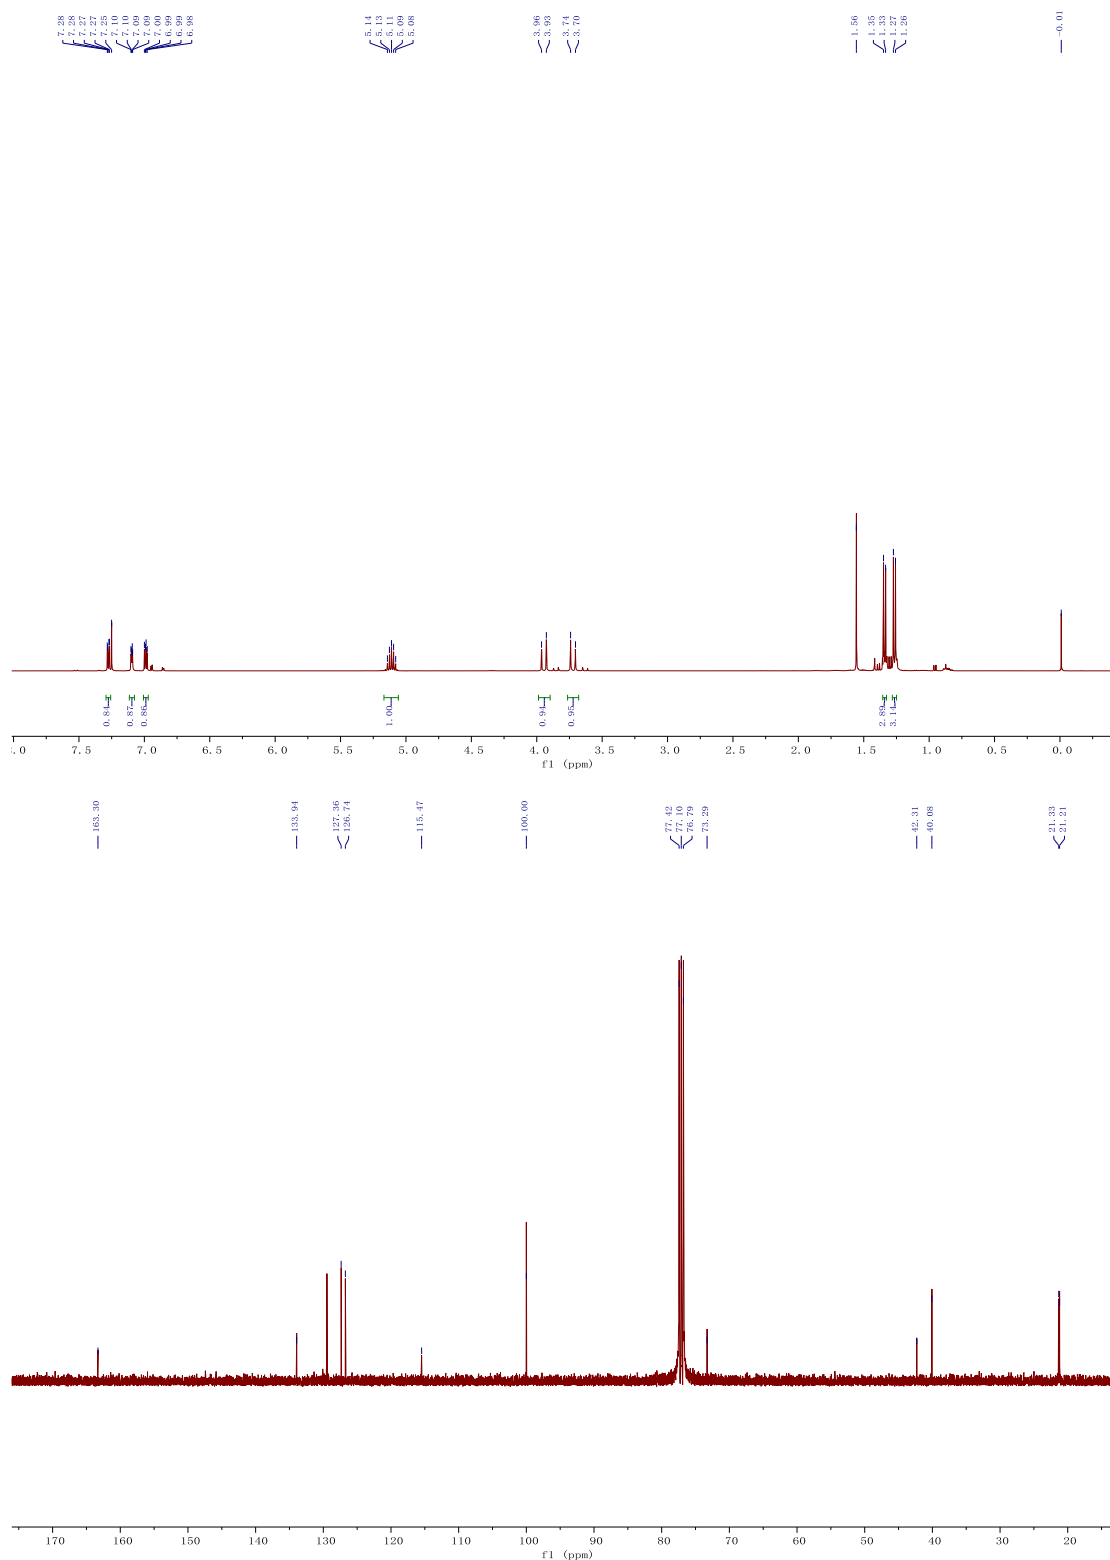

# Isopropyl 2-bromo-2-cyano-3-(naphthalen-2-yl)propanoate (11)

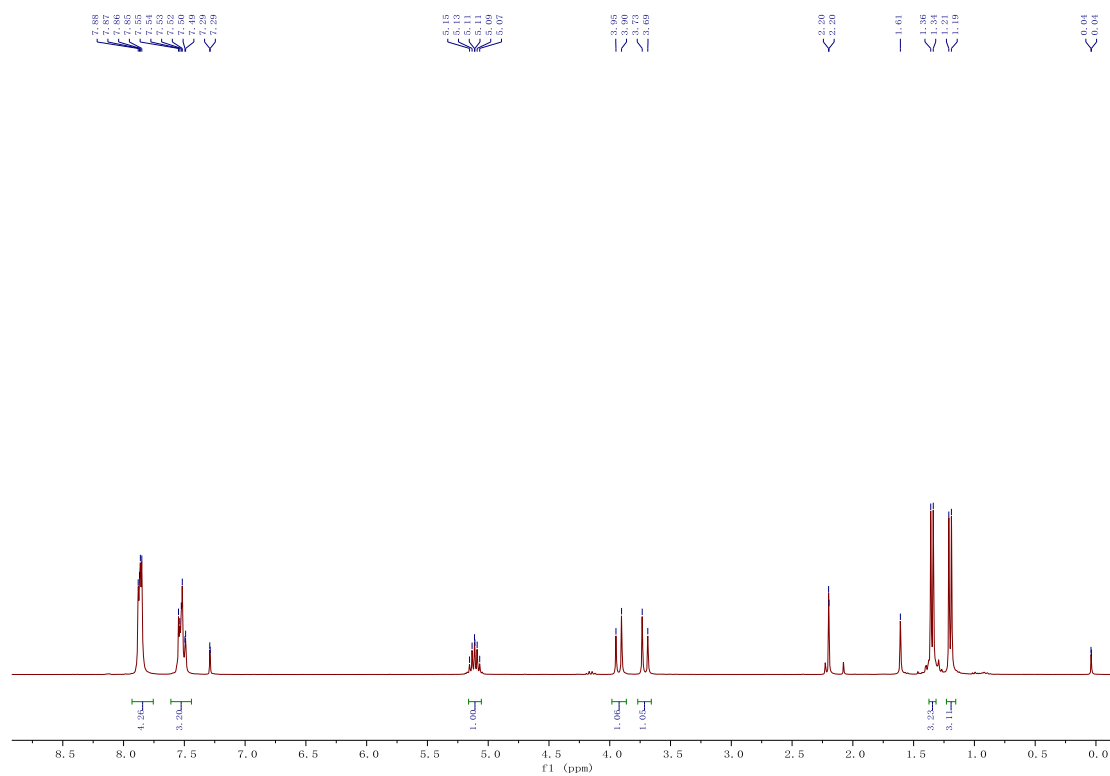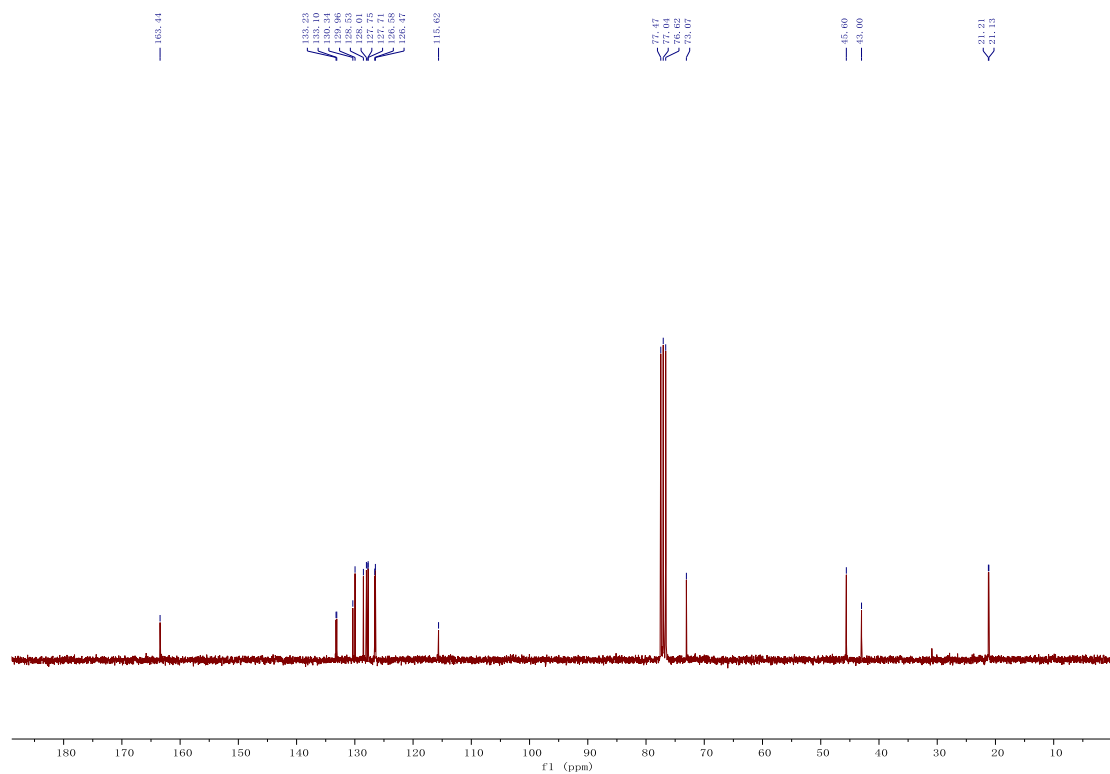

# Isopropyl 2-bromo-2-cyano-4-phenylbutanoate (1m)

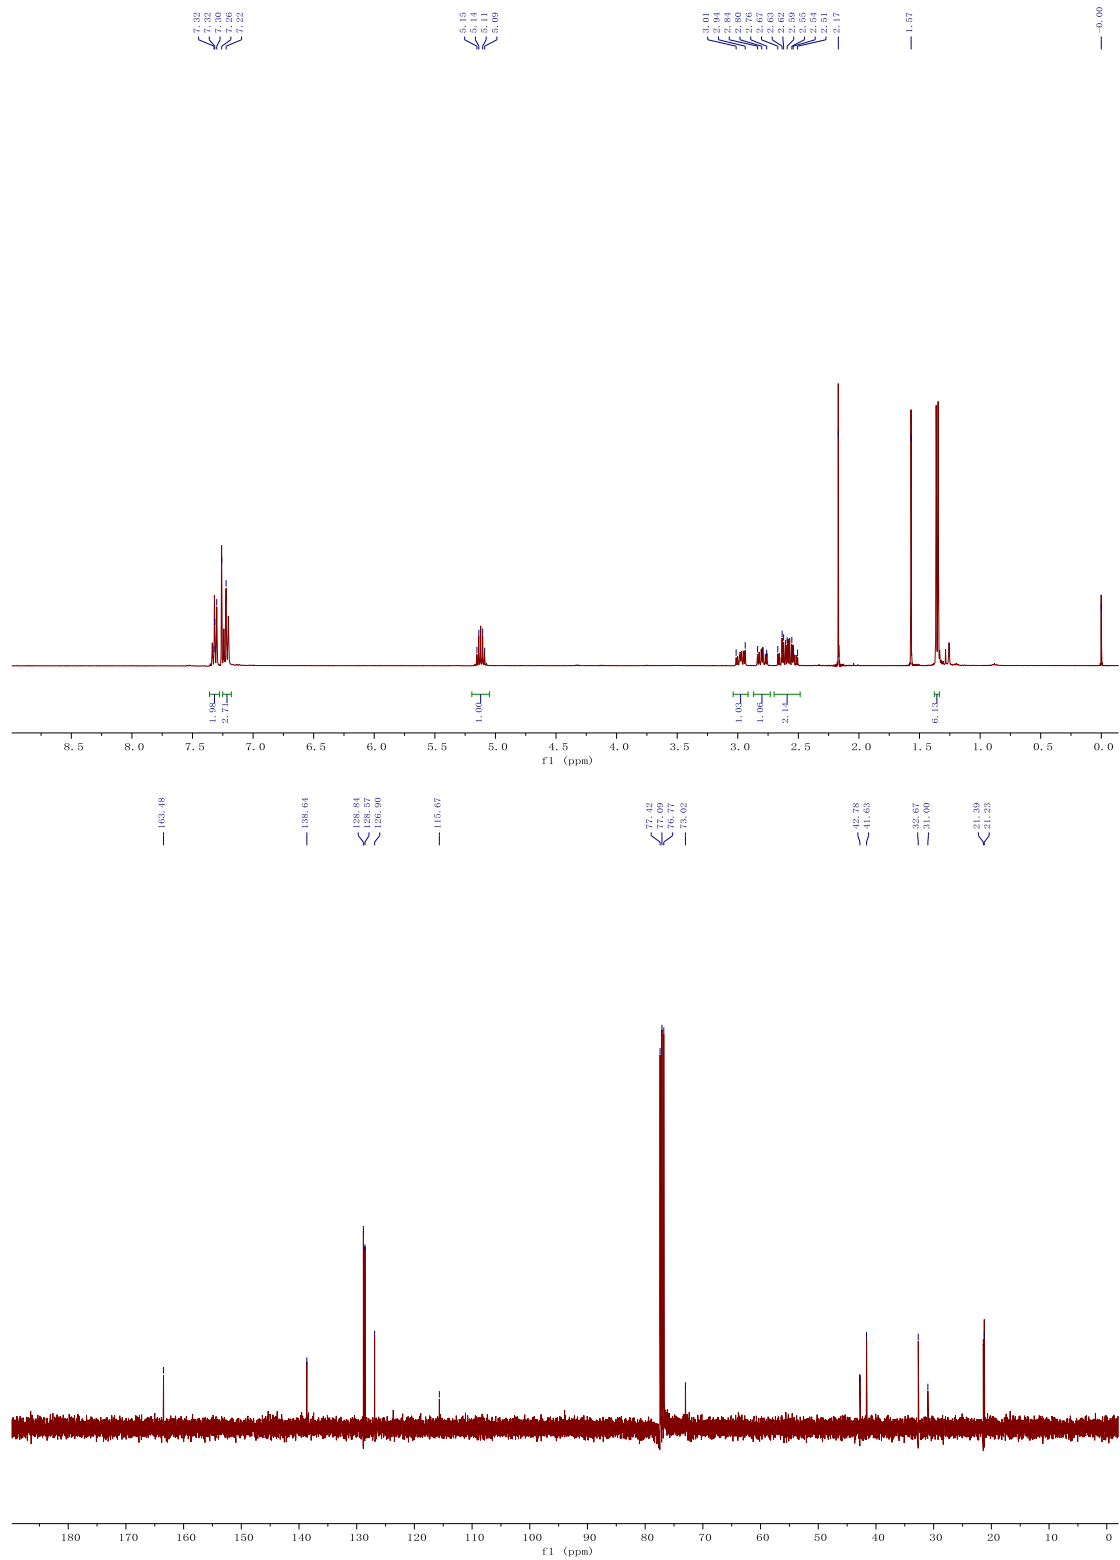

# Isopropyl 2-bromo-2-cyano-5-phenylpentanoate (1n)

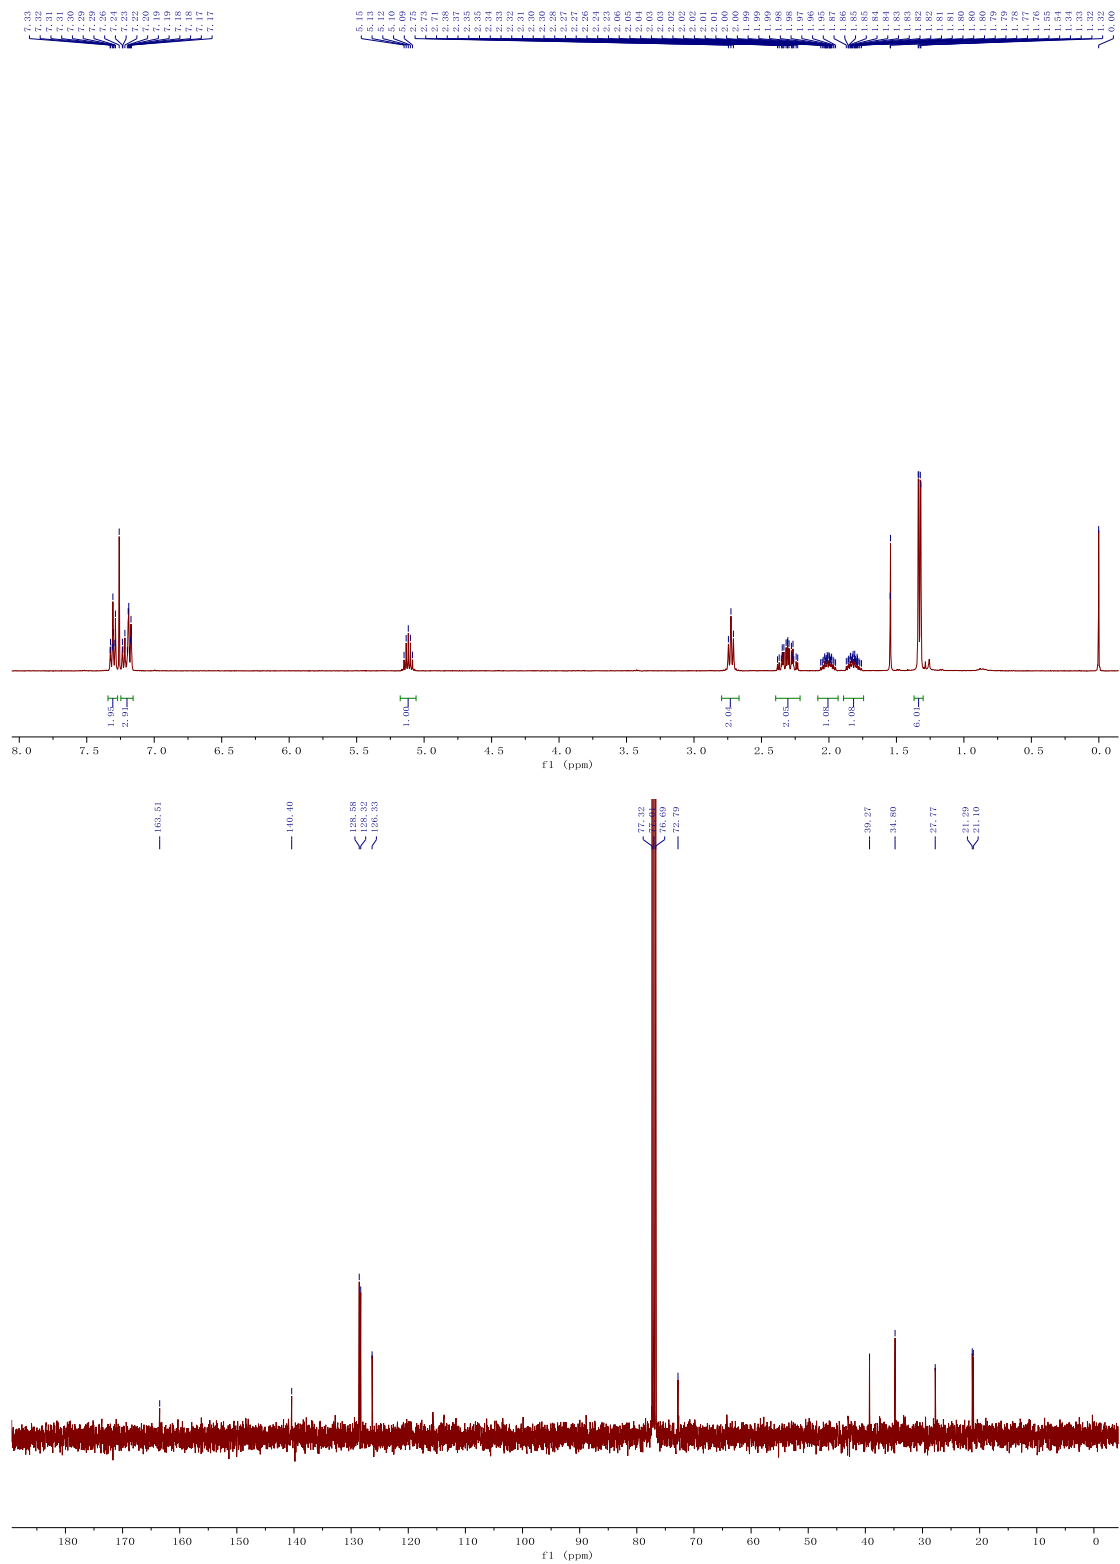

# Isopropyl 2-bromo-2-cyanopropanoate (1o)

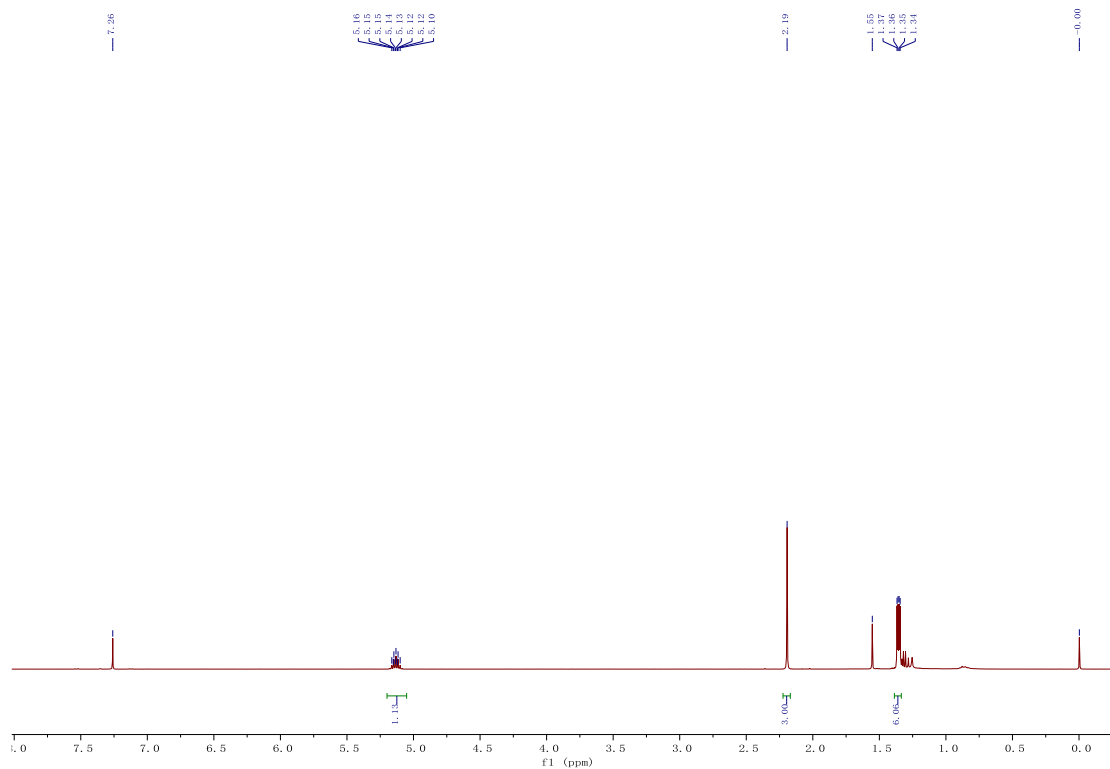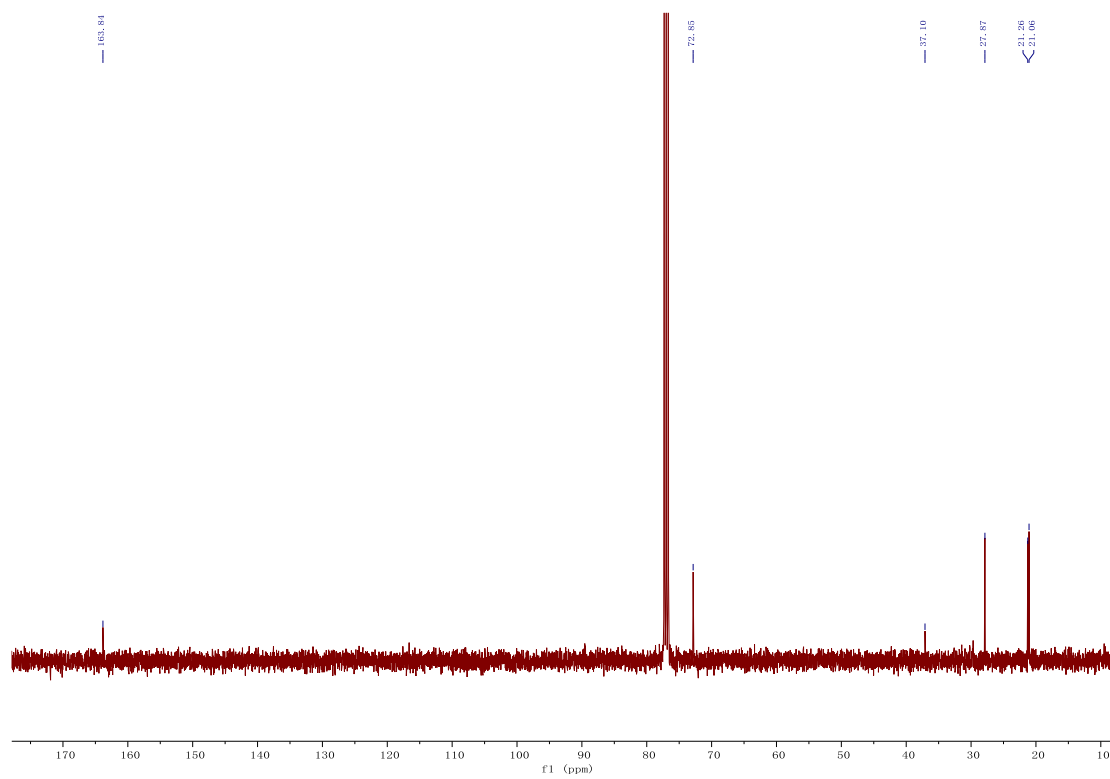

# Isopropyl 2-bromo-2-cyanobutanoate (1p)

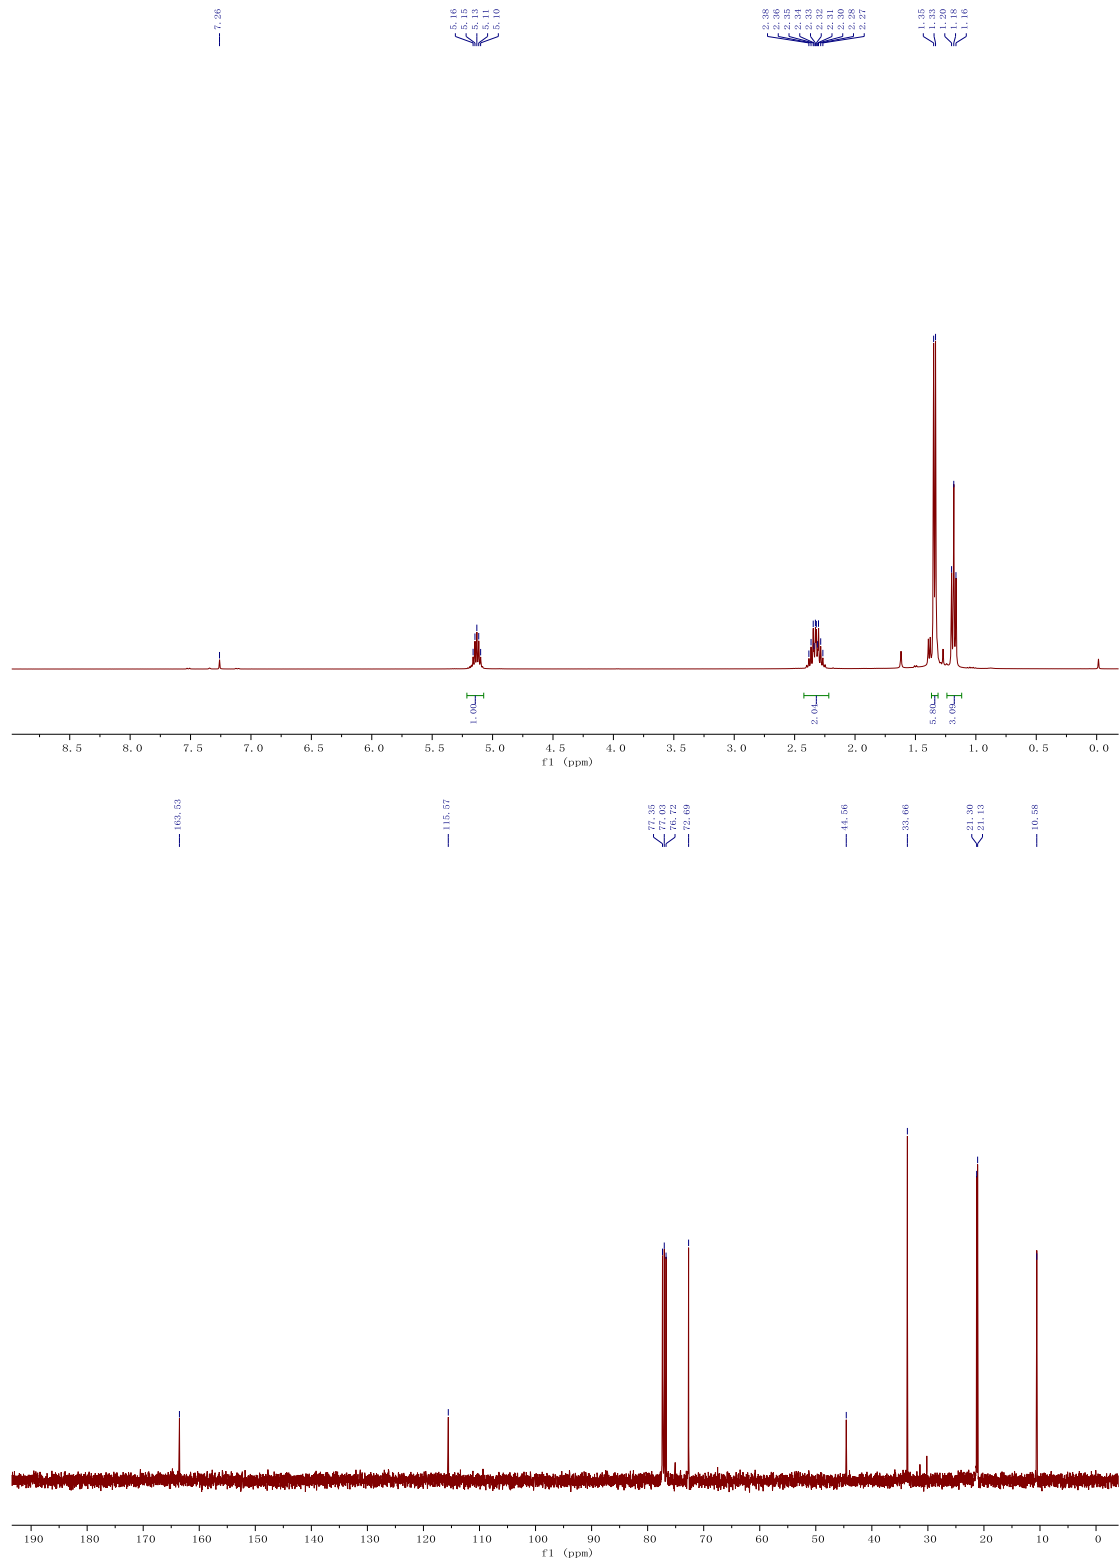

# Isopropyl 2-bromo-2-cyano-5-methylhexanoate (1q)

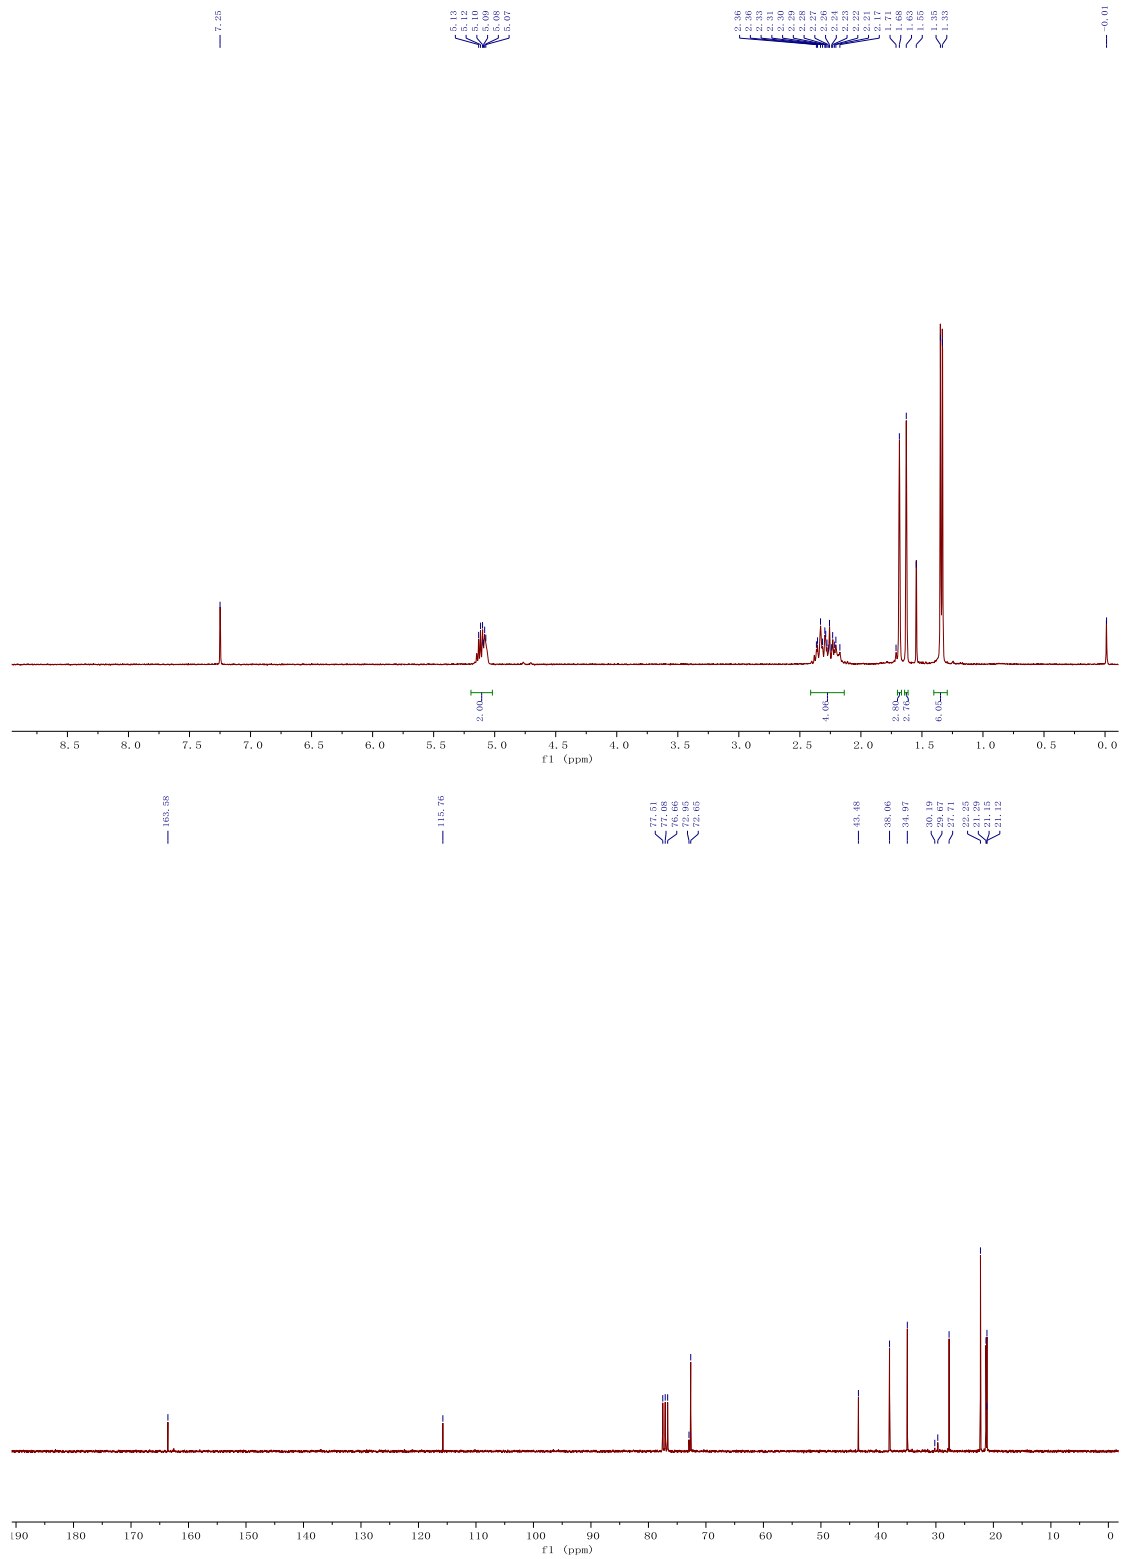

# isopropyl 2-bromo-2-cyanopent-4-enoate (1r)

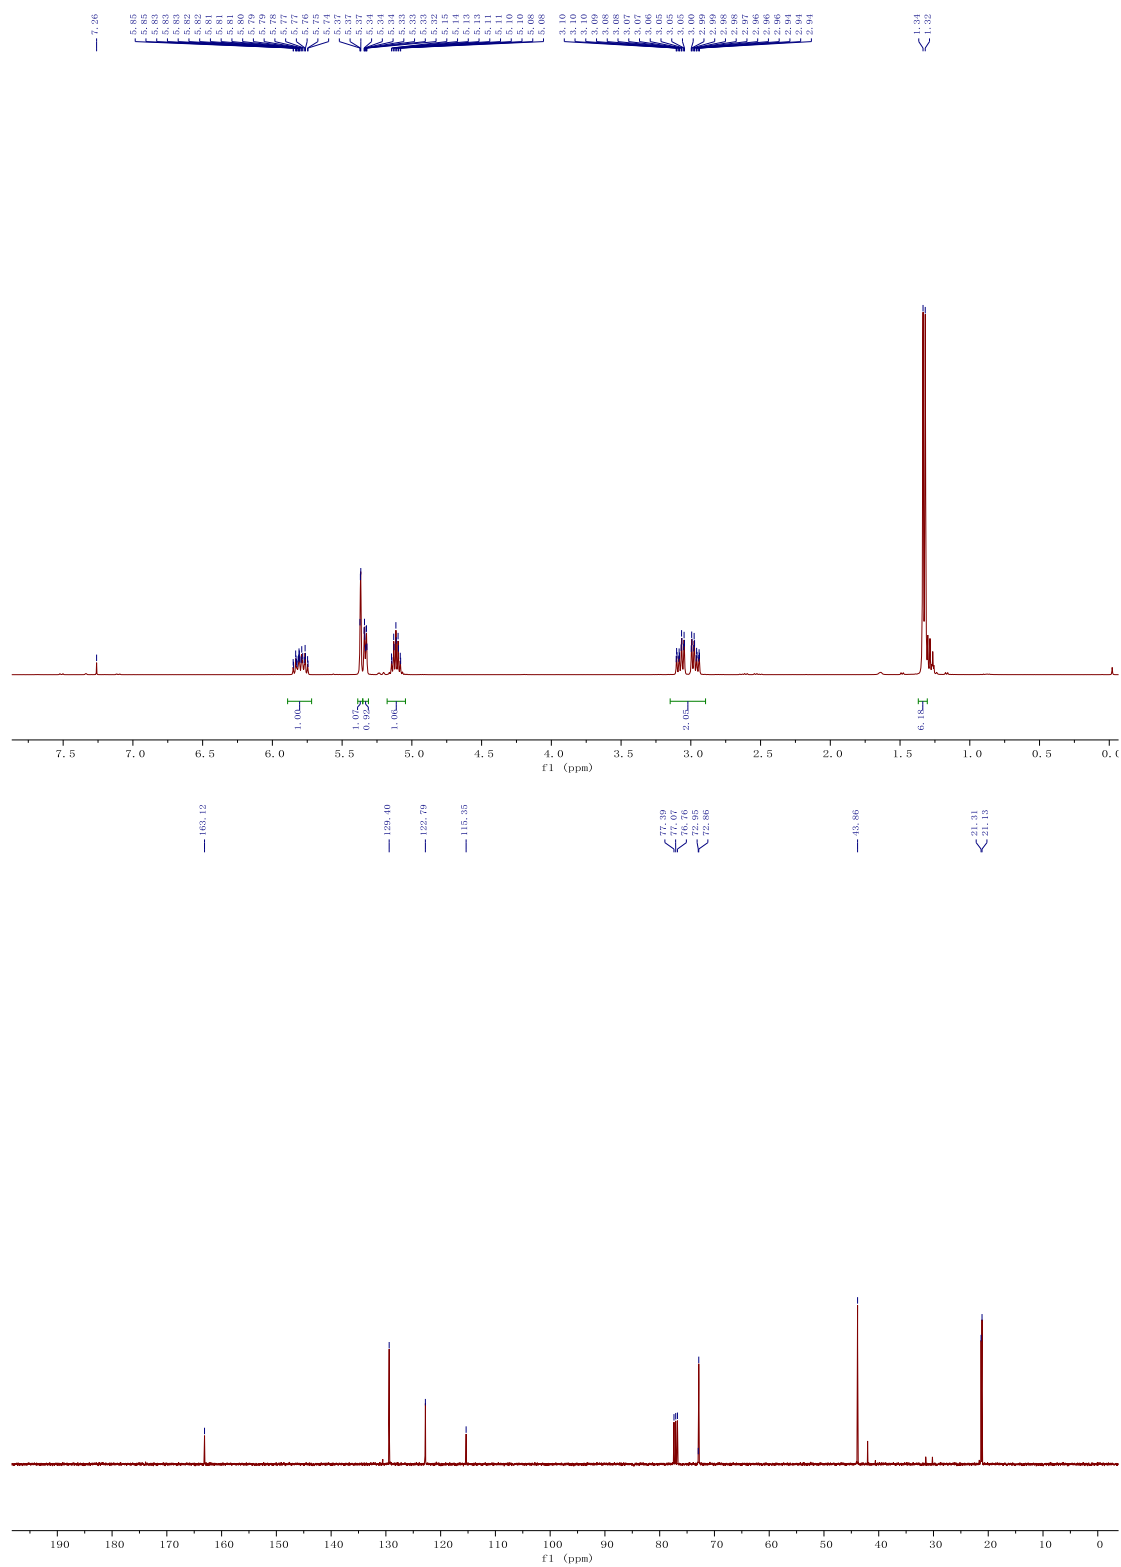



# Isopropyl 2-bromo-2-cyano-4-methylpent-4-enoate (1s)

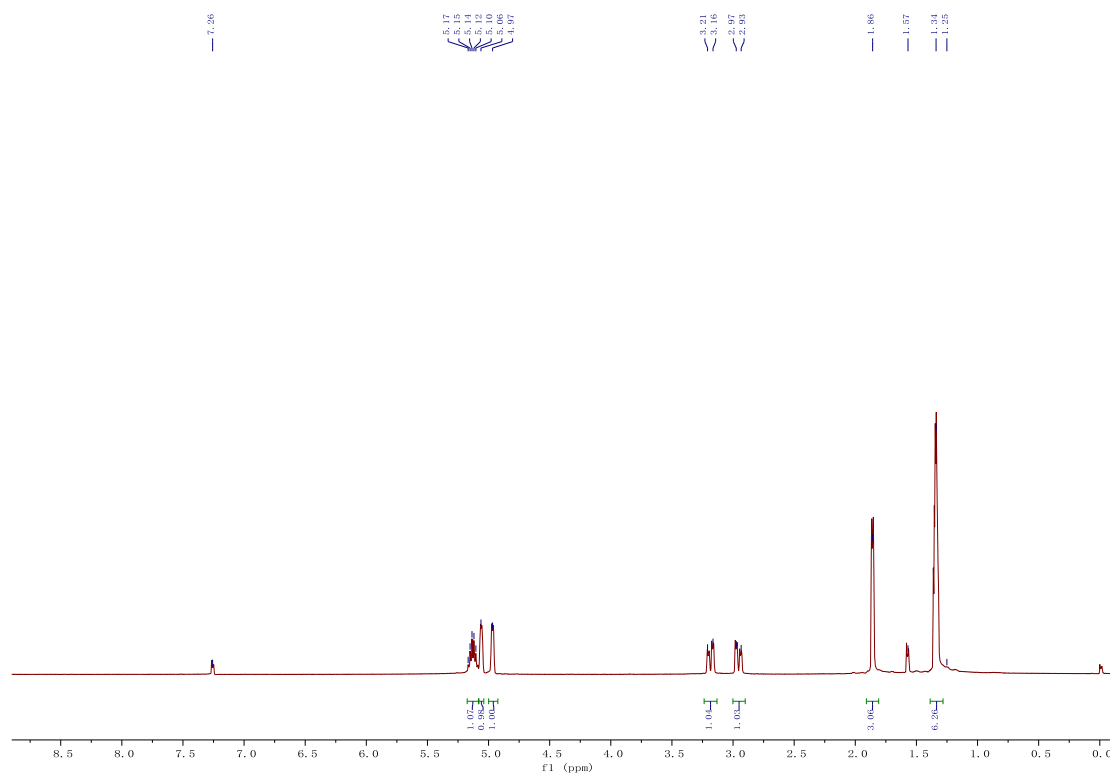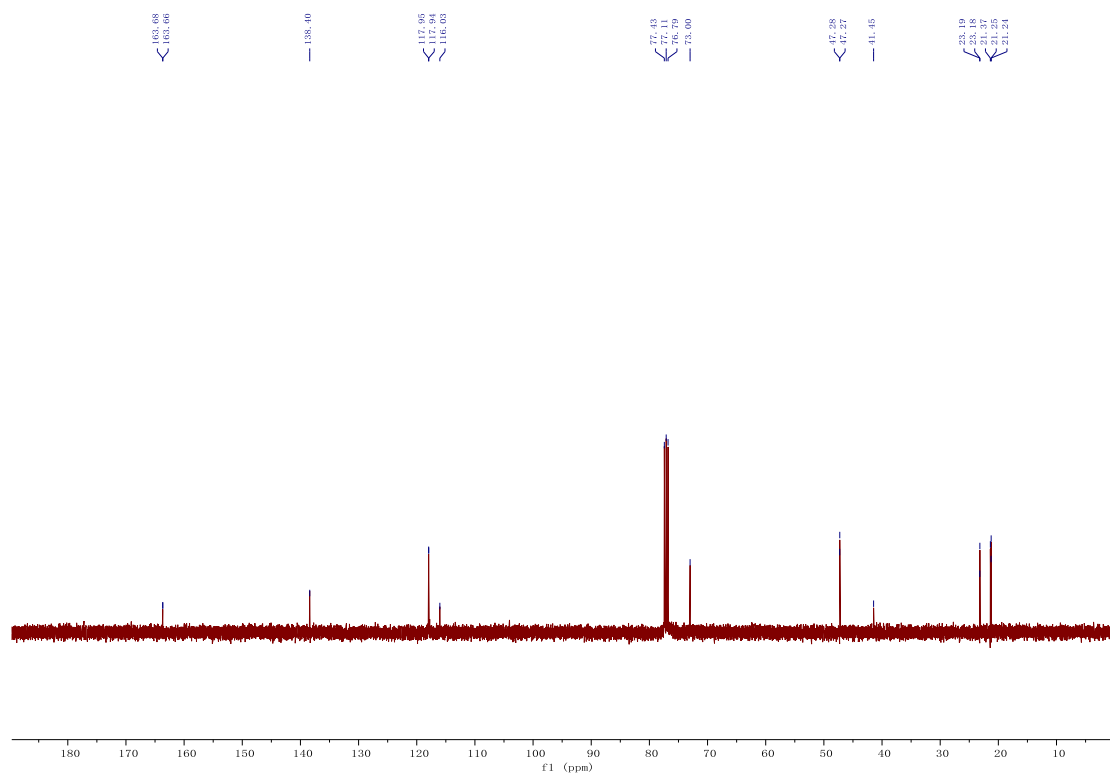

# Isopropyl 2-bromo-2-cyanohept-6-enoate (1t)

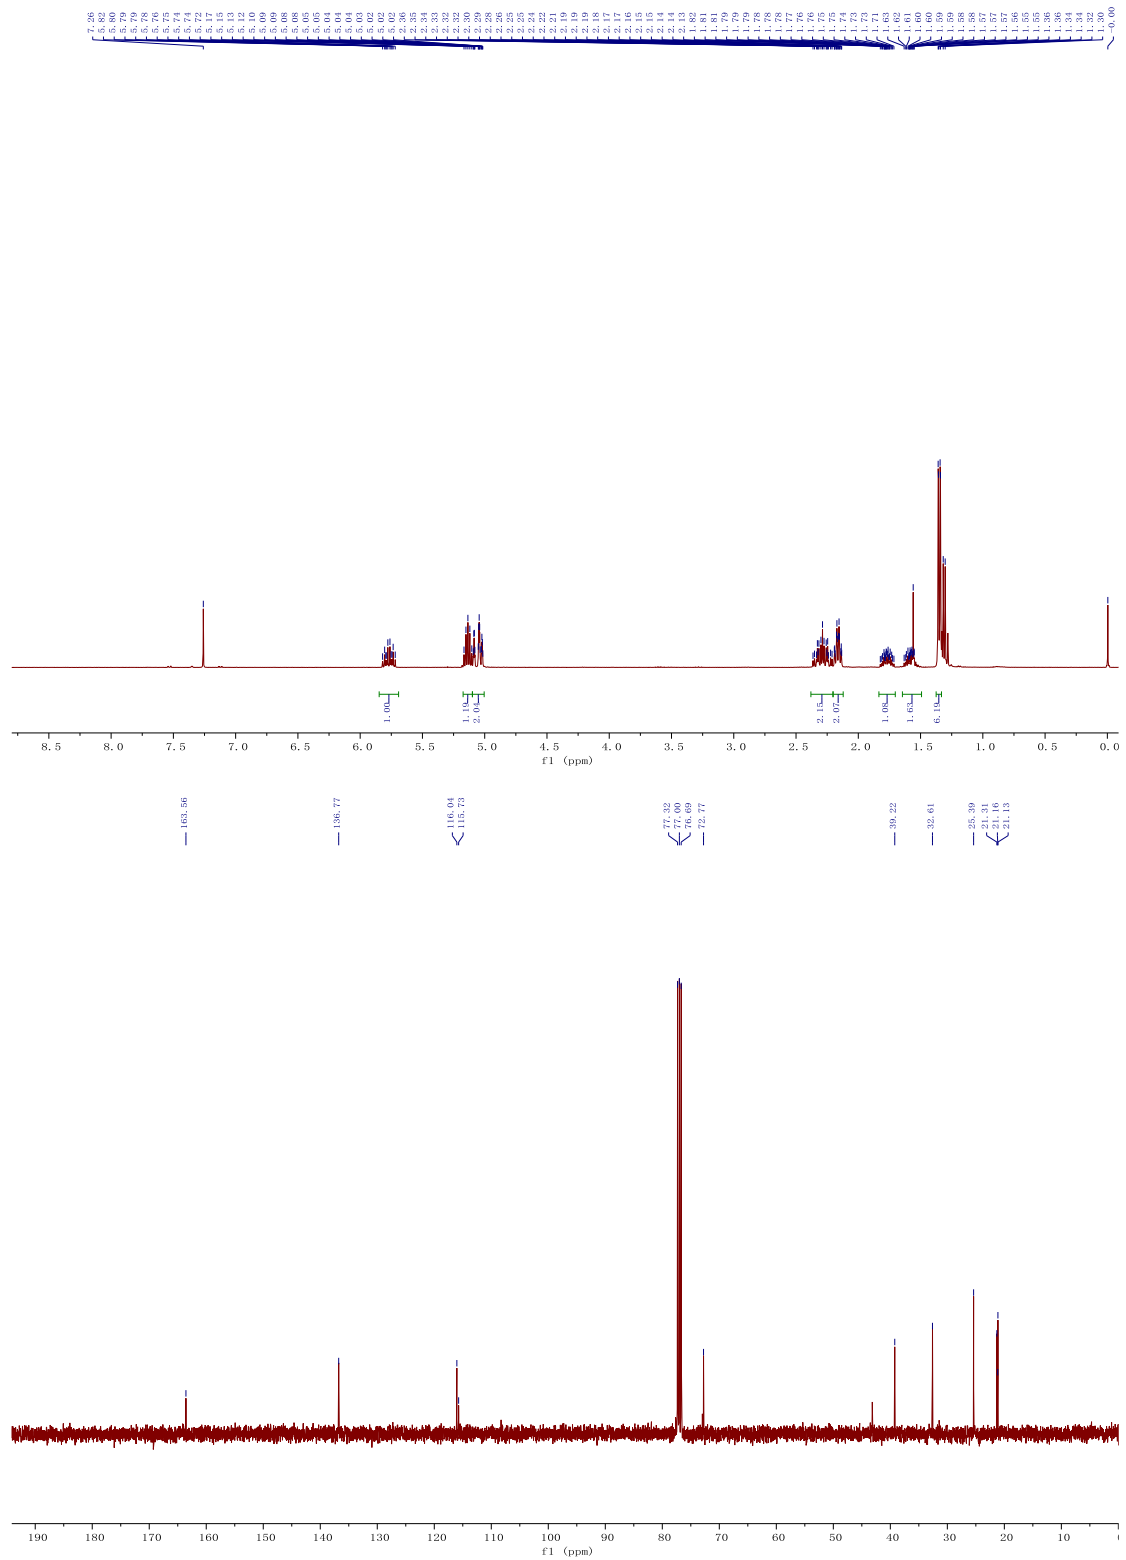

# Isopropyl 2-bromo-2-cyanooct-7-enoate (1u)

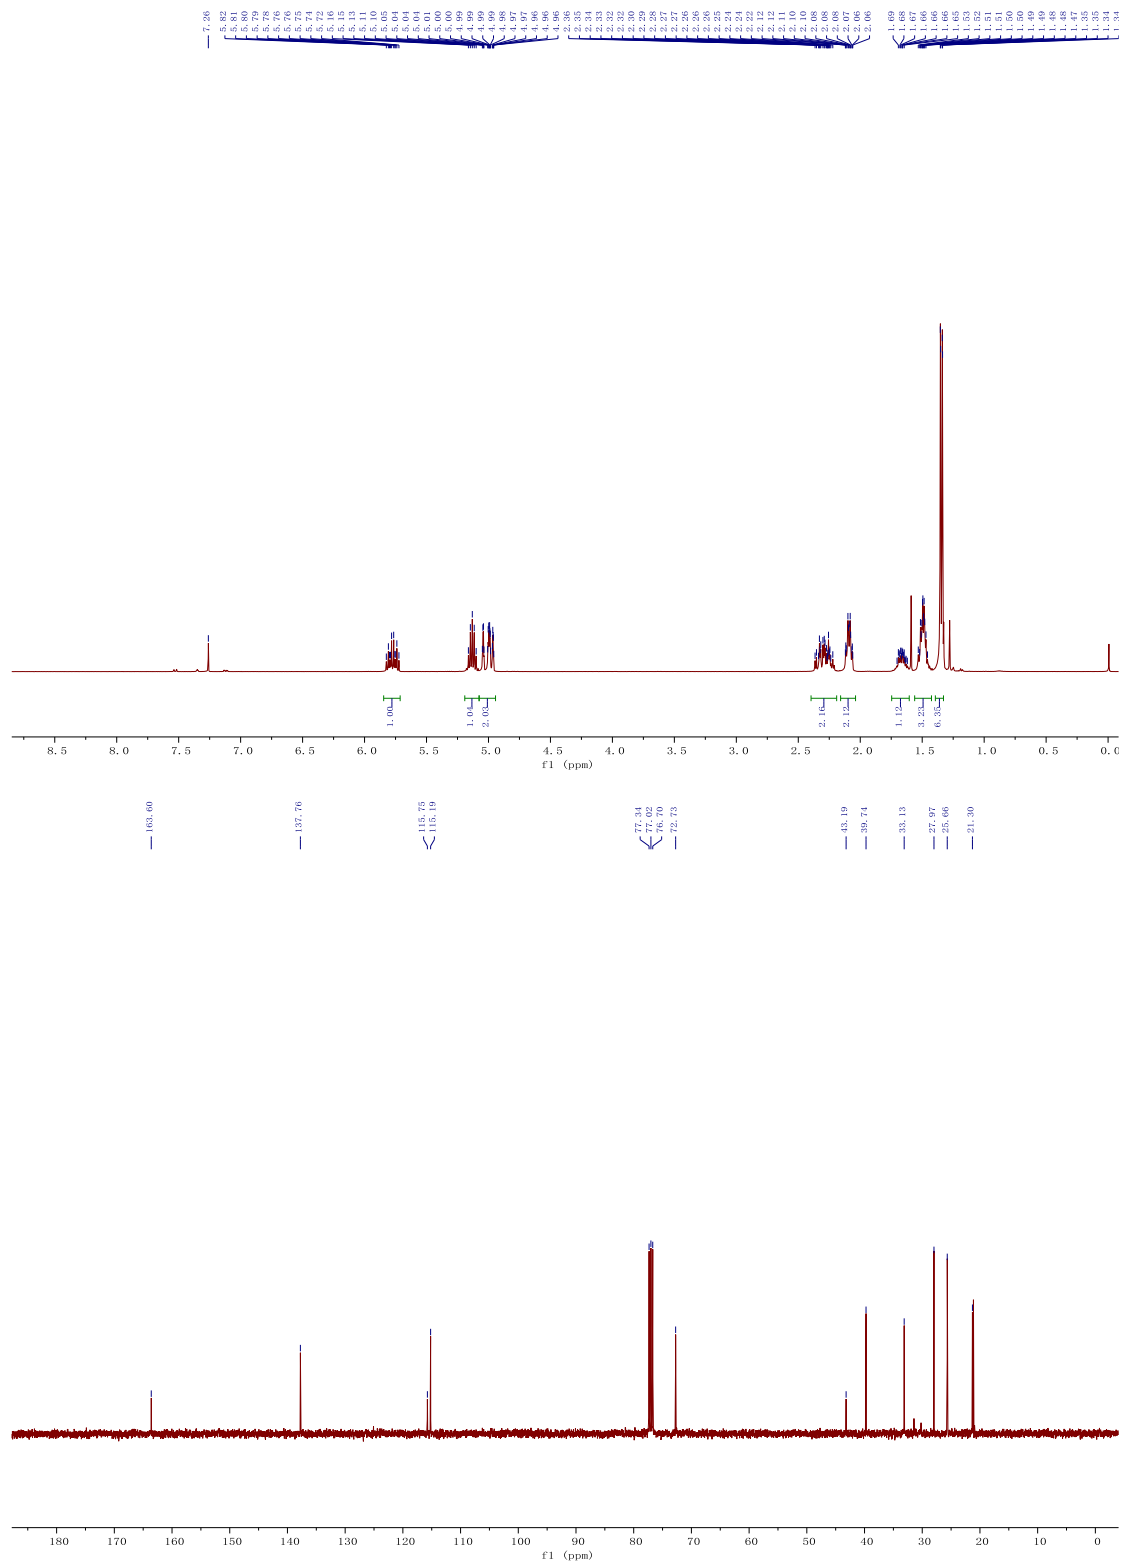

# Isopropyl 2-bromo-2-cyanohexanoate (1v)

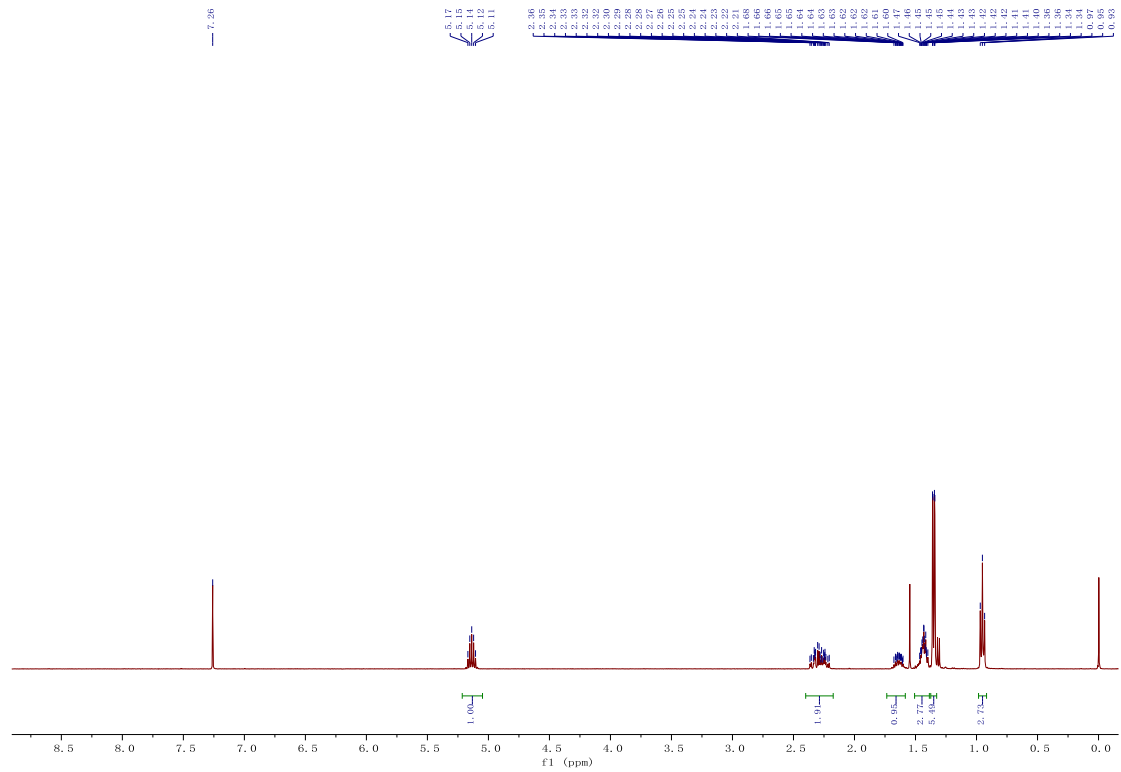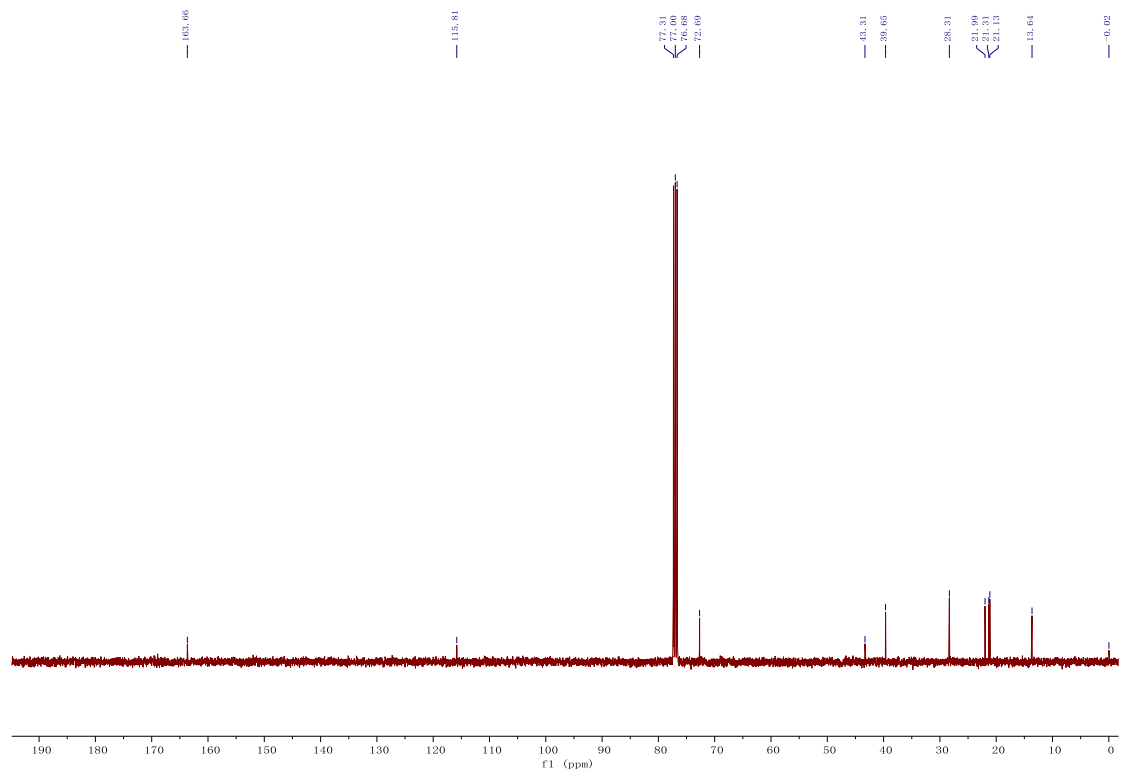

isopropyl (R)-2-((N-benzylbenzamido)oxy)-2-cyano-3-phenylpropanoate (4g)

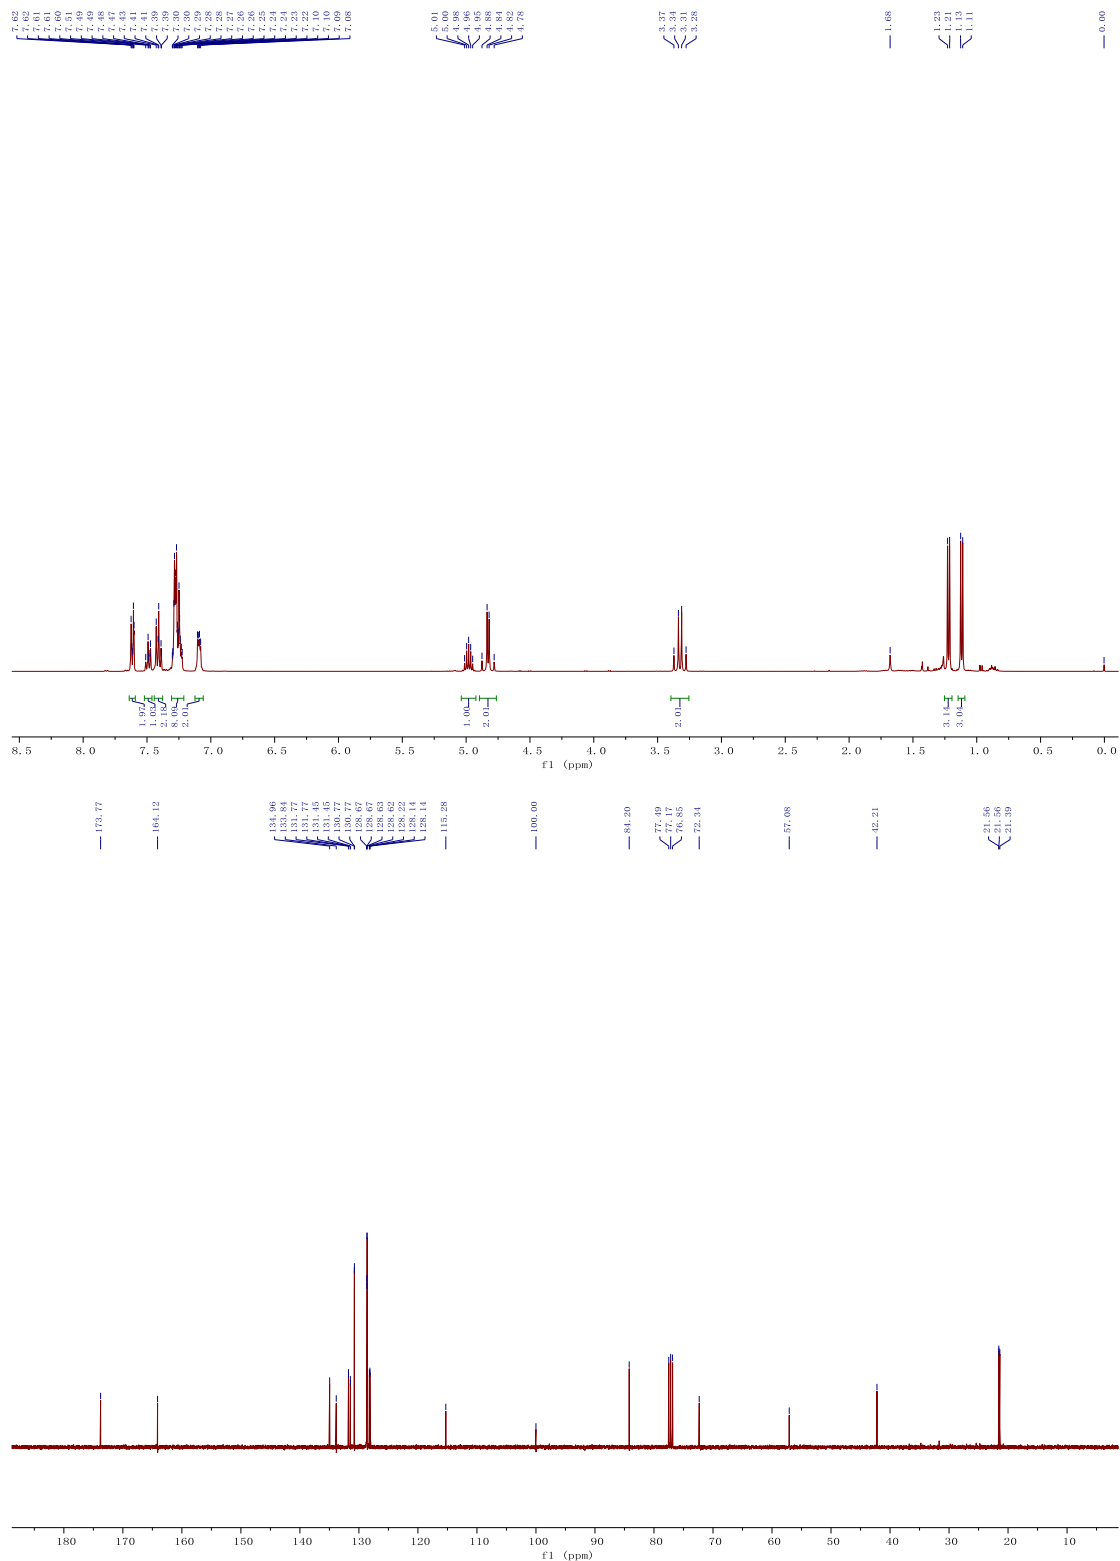

**isopropyl (R)-2-((N-benzylbenzamido)oxy)-2-cyano-3-(4-fluorophenyl)propanoate (4i)**

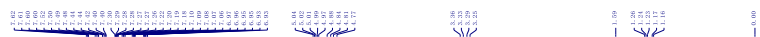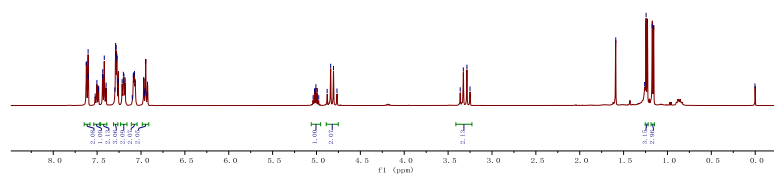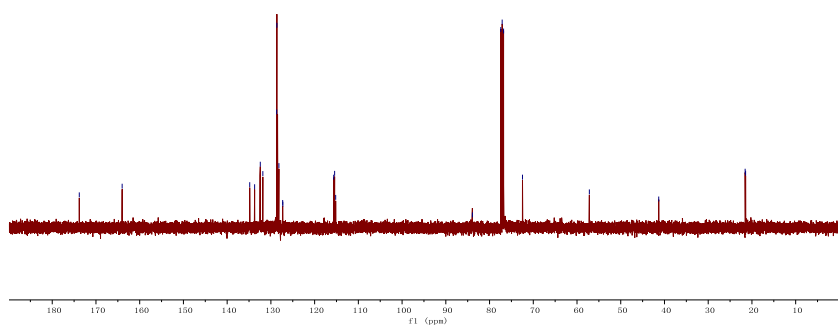

S#427180

-112.96

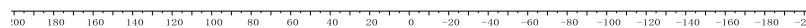

**isopropyl (R)-2-((N-benzylbenzamido)oxy)-3-(4-bromophenyl)-2-cyanopropanoate (4j)**

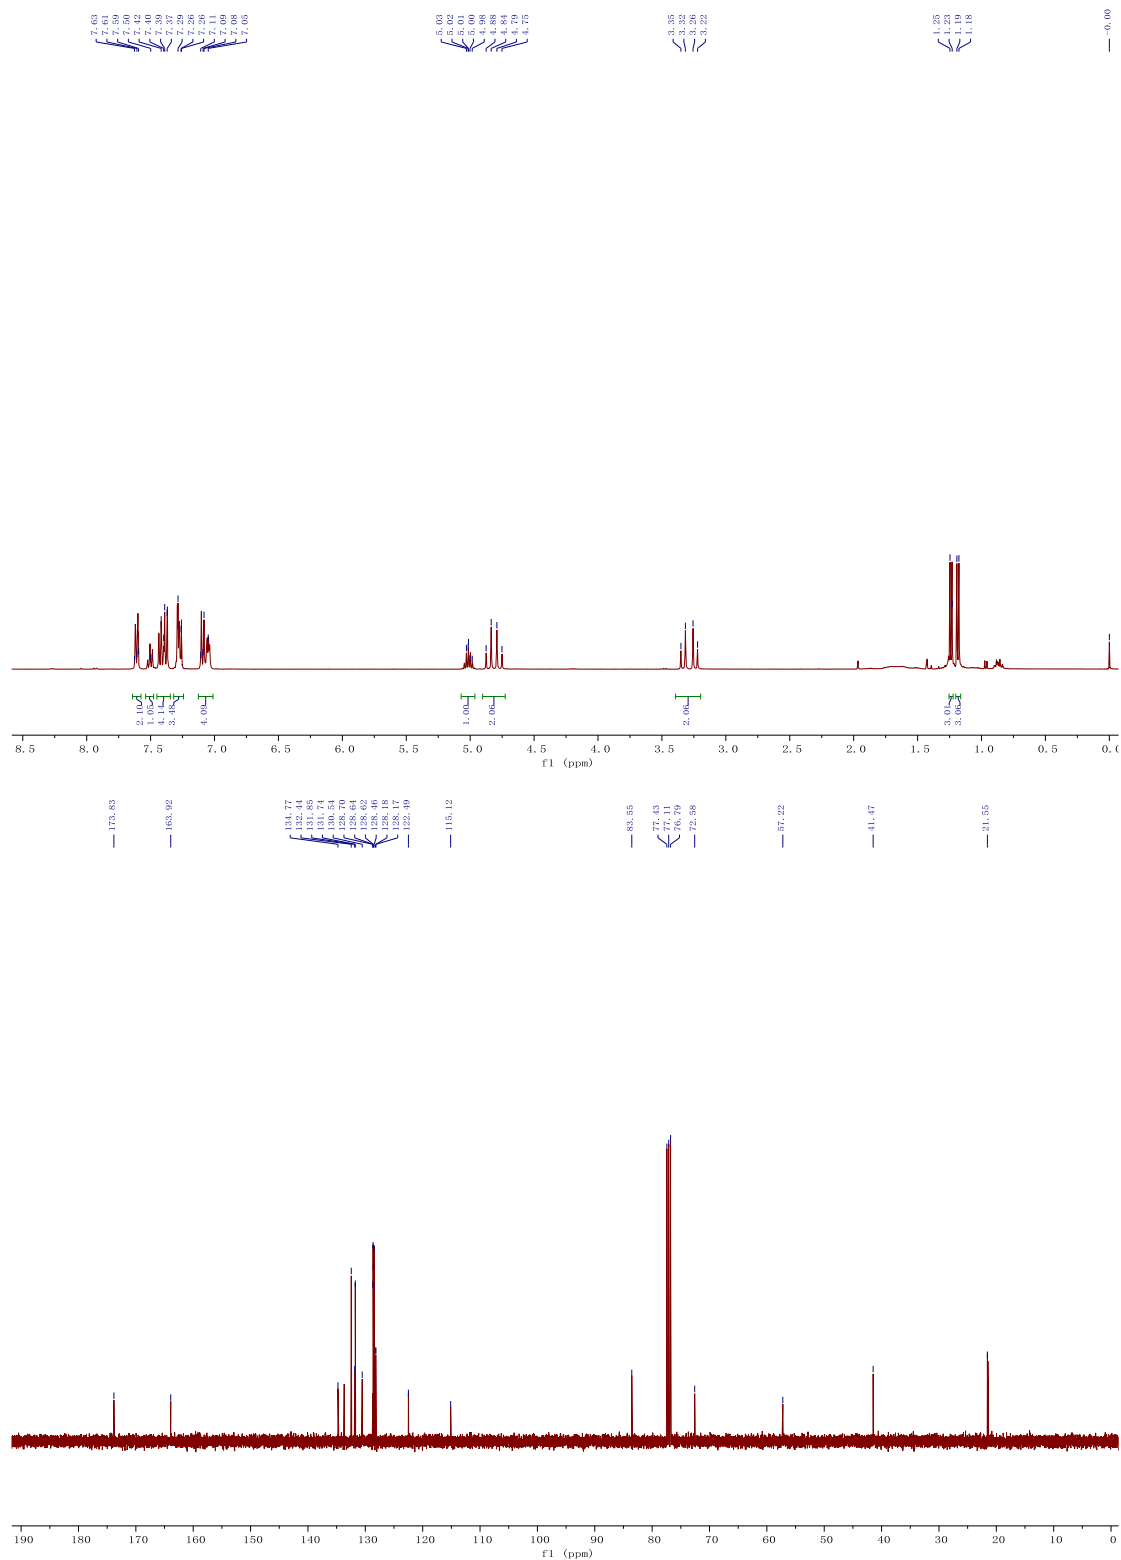

isopropyl (R)-2-((N-benzylbenzamido)oxy)-2-cyano-3-(2-iodophenyl)propanoate  
(4k)

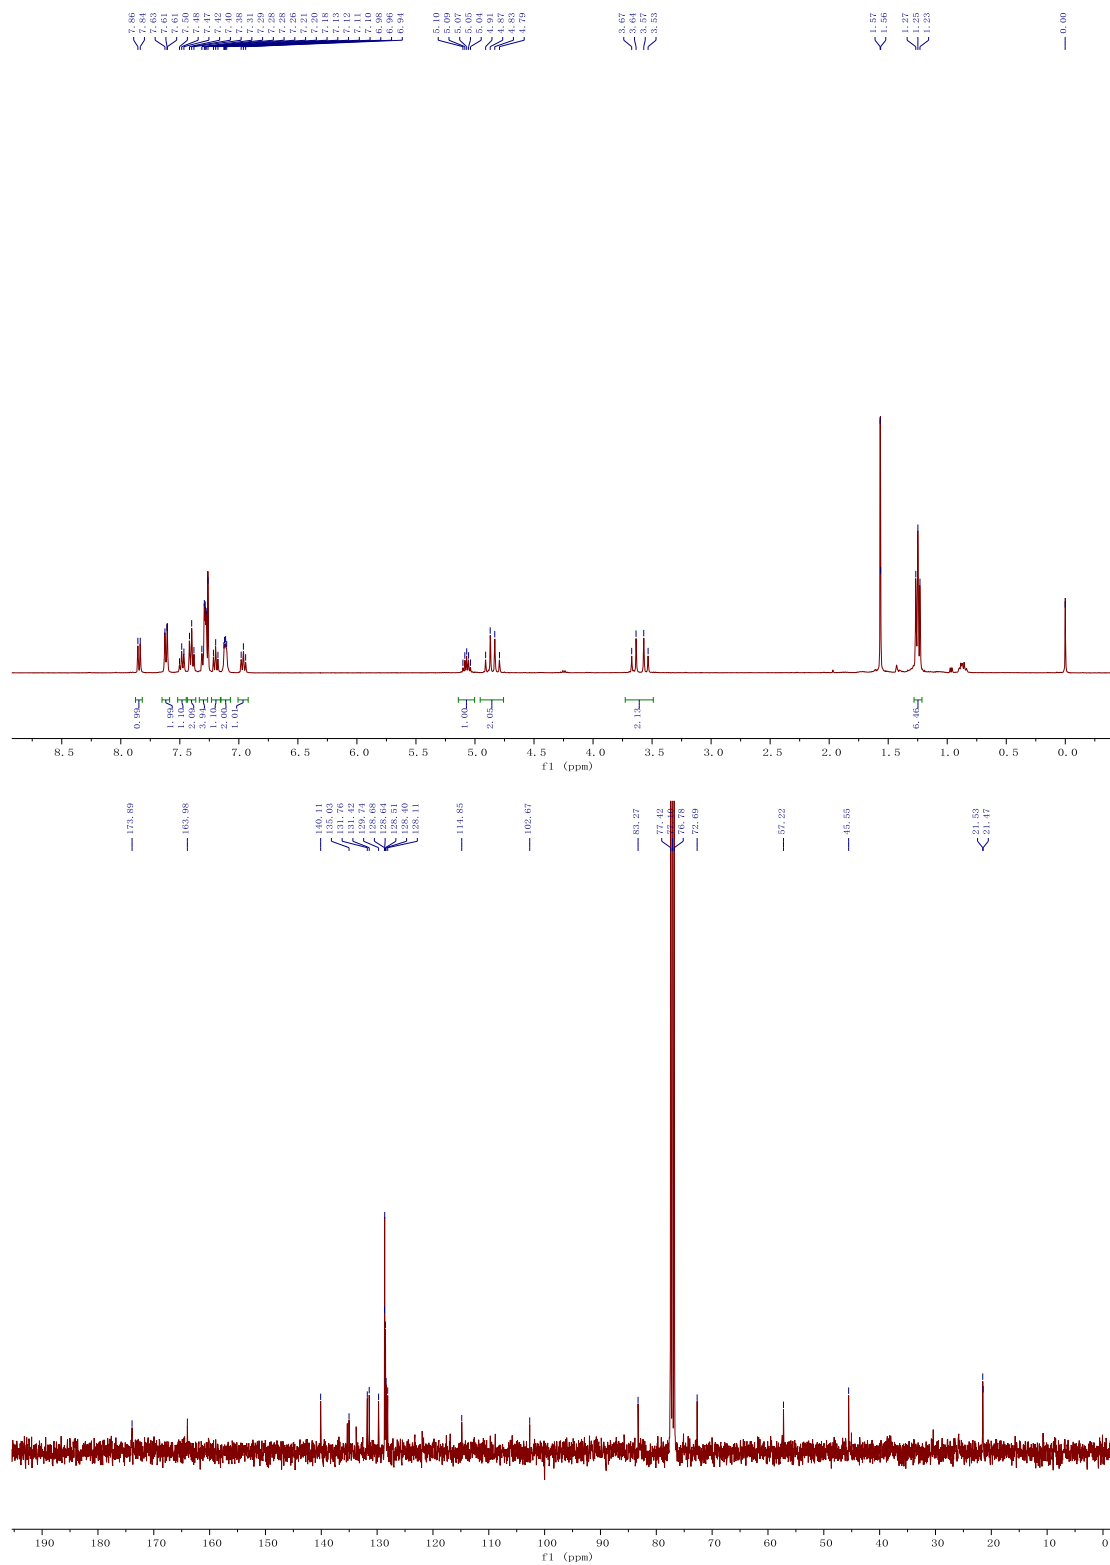



isopropyl (R)-2-((N-benzylbenzamido)oxy)-2-cyano-3-(4-nitrophenyl)propanoate  
(4I)

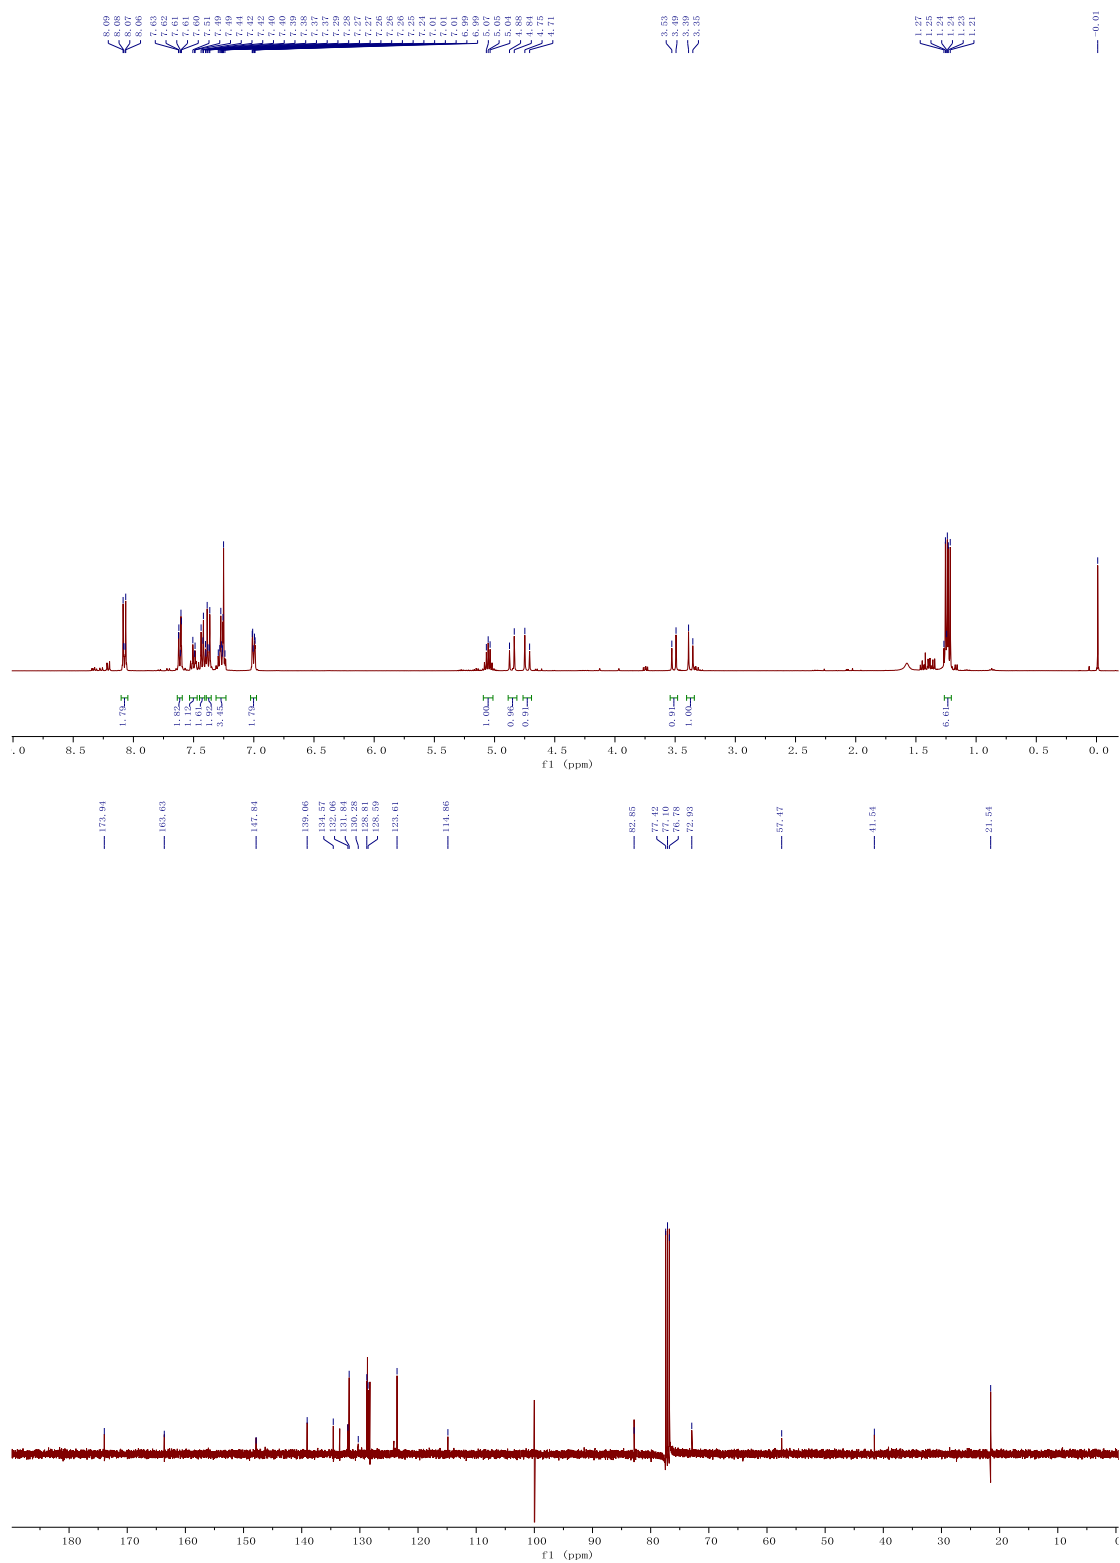

**isopropyl (R)-2-((N-benzylbenzamido)oxy)-2-cyano-3-(4-methoxyphenyl)propanoate (4m)**

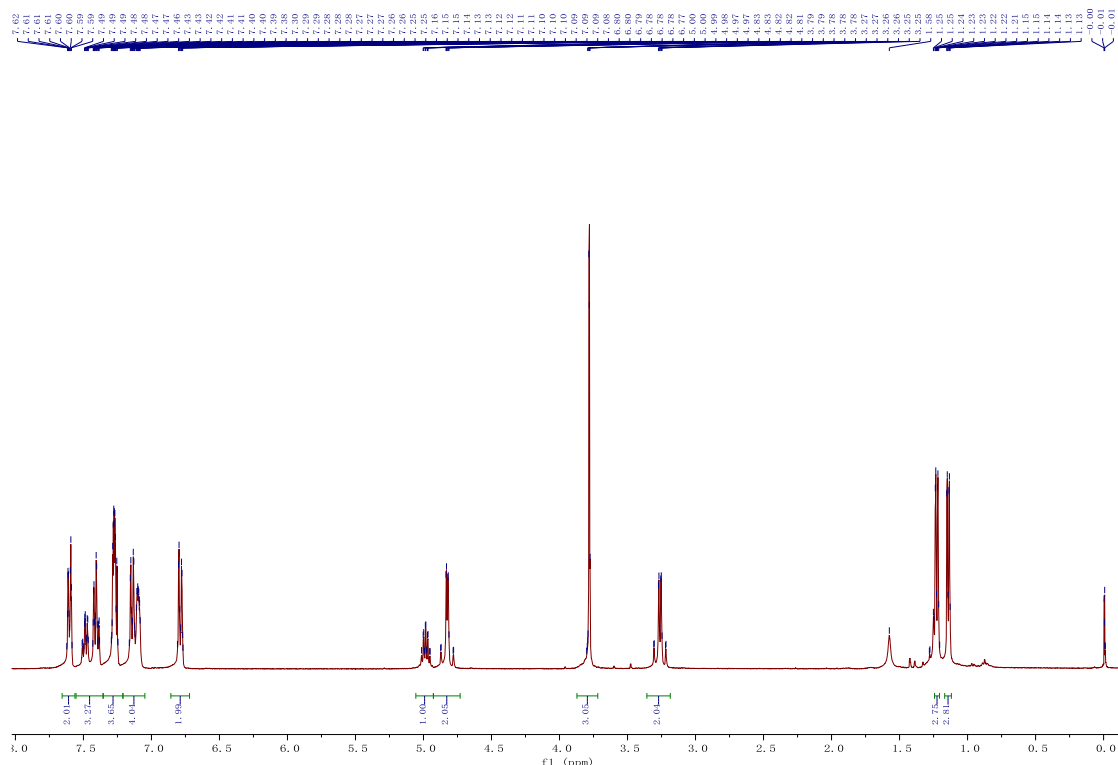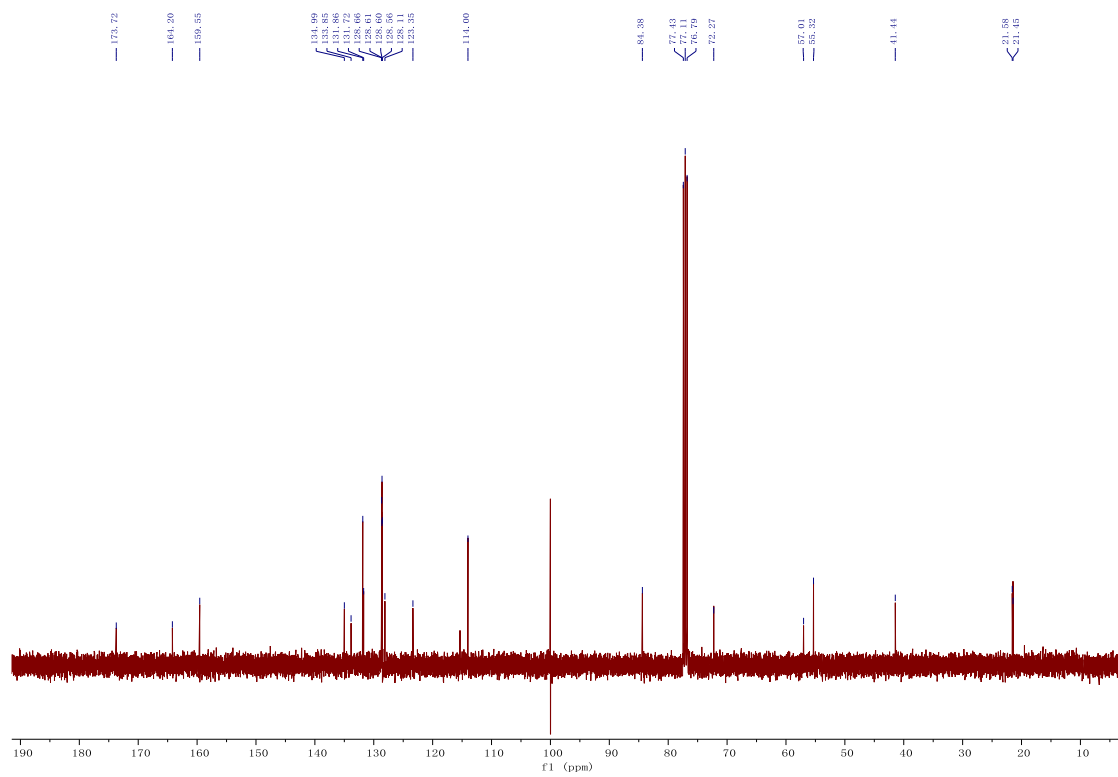



isopropyl (R)-2-((N-benzylbenzamido)oxy)-2-cyano-3-(thiophen-2-yl)propanoate  
(4o)

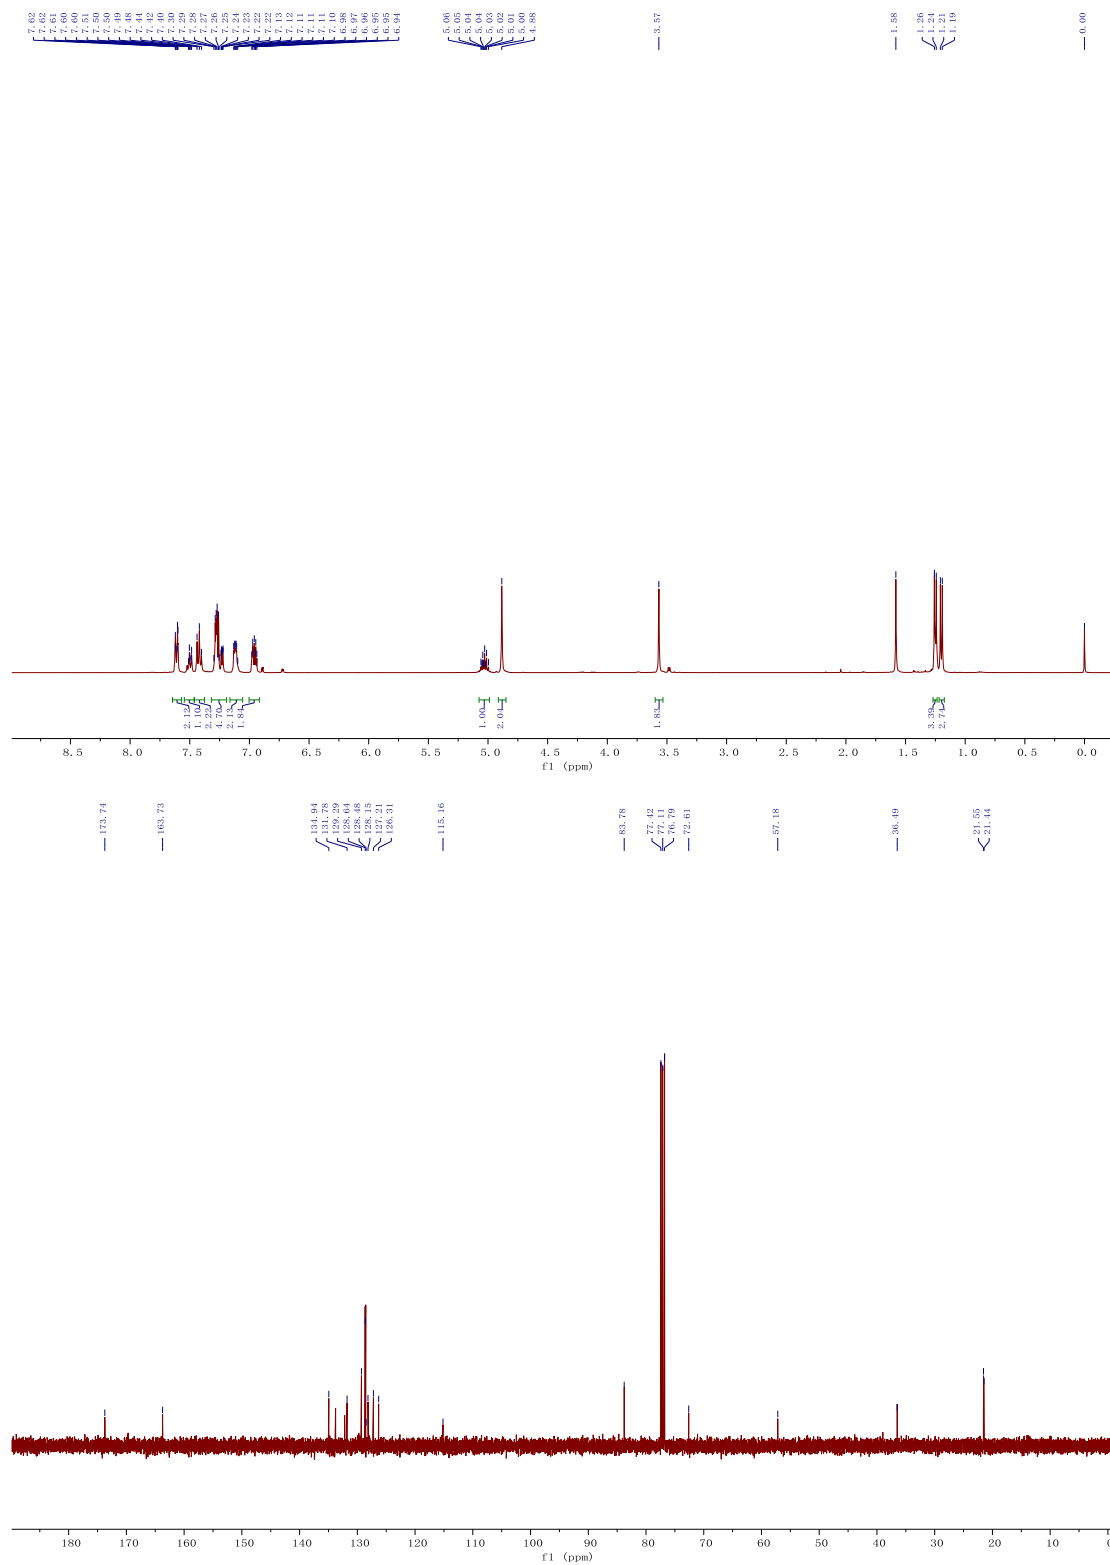

**isopropyl (R)-2-((N-benzylbenzamido)oxy)-2-cyano-3-(naphthalen-2-yl)propanoate (4p)**

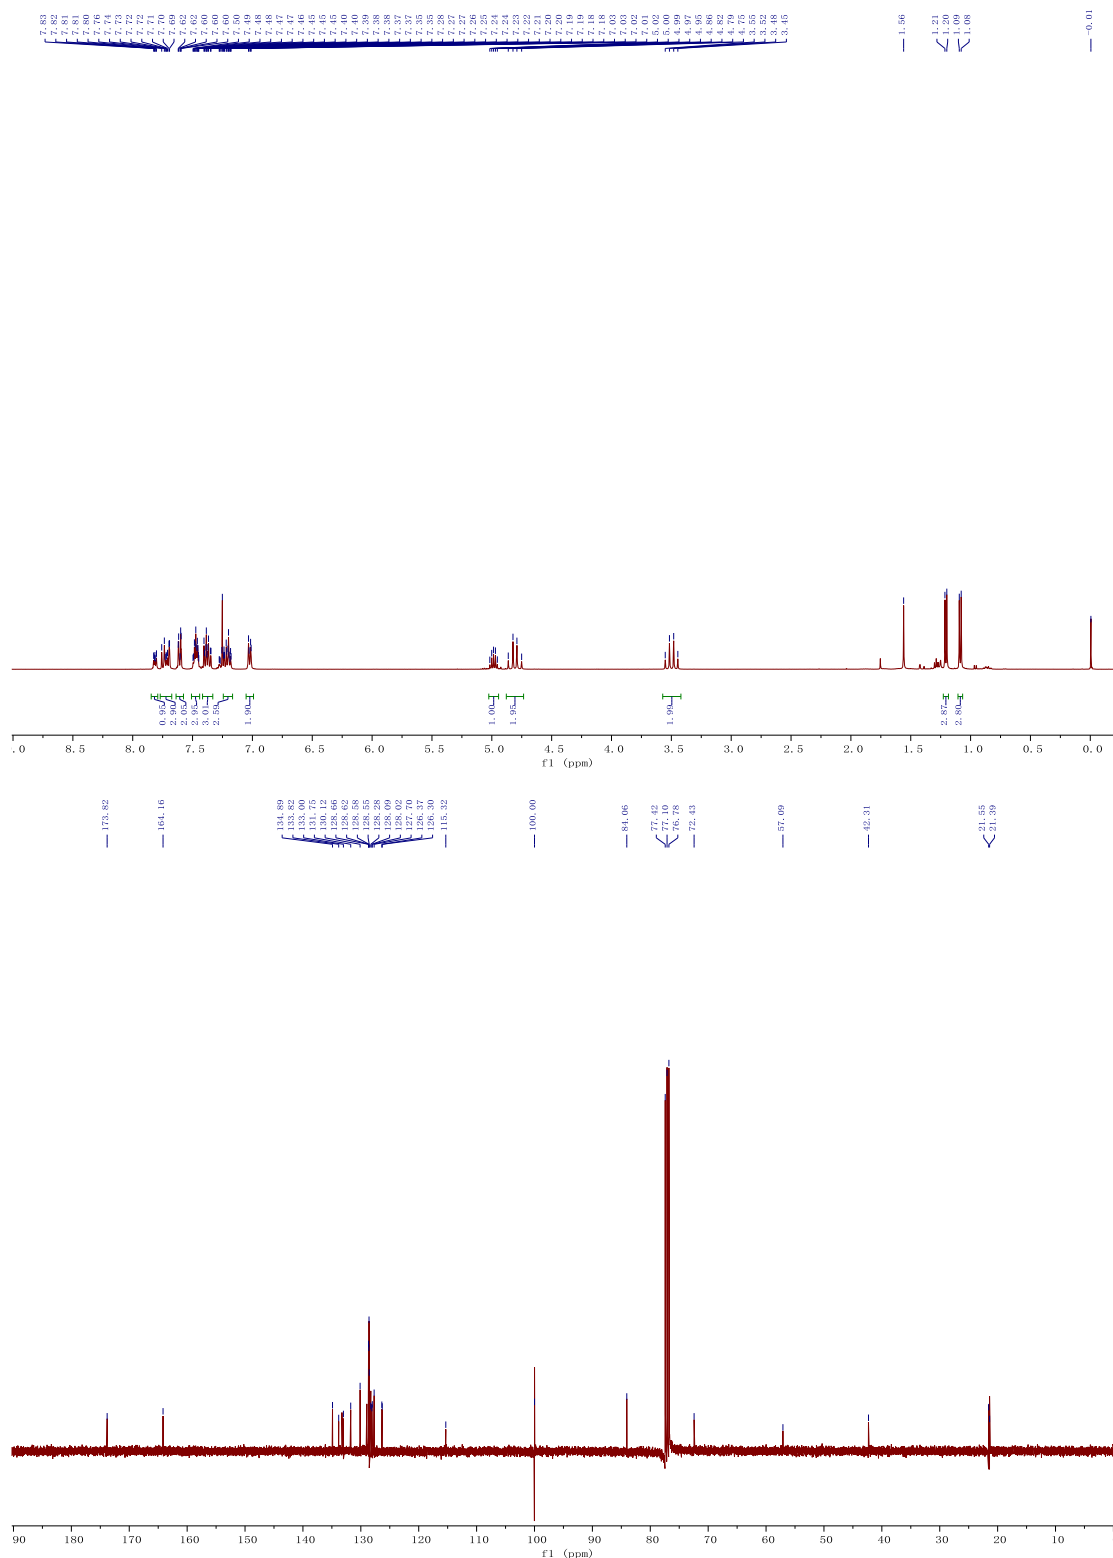

# isopropyl (R)-2-((N-benzylbenzamido)oxy)-2-cyano-4-phenylbutanoate (4q)

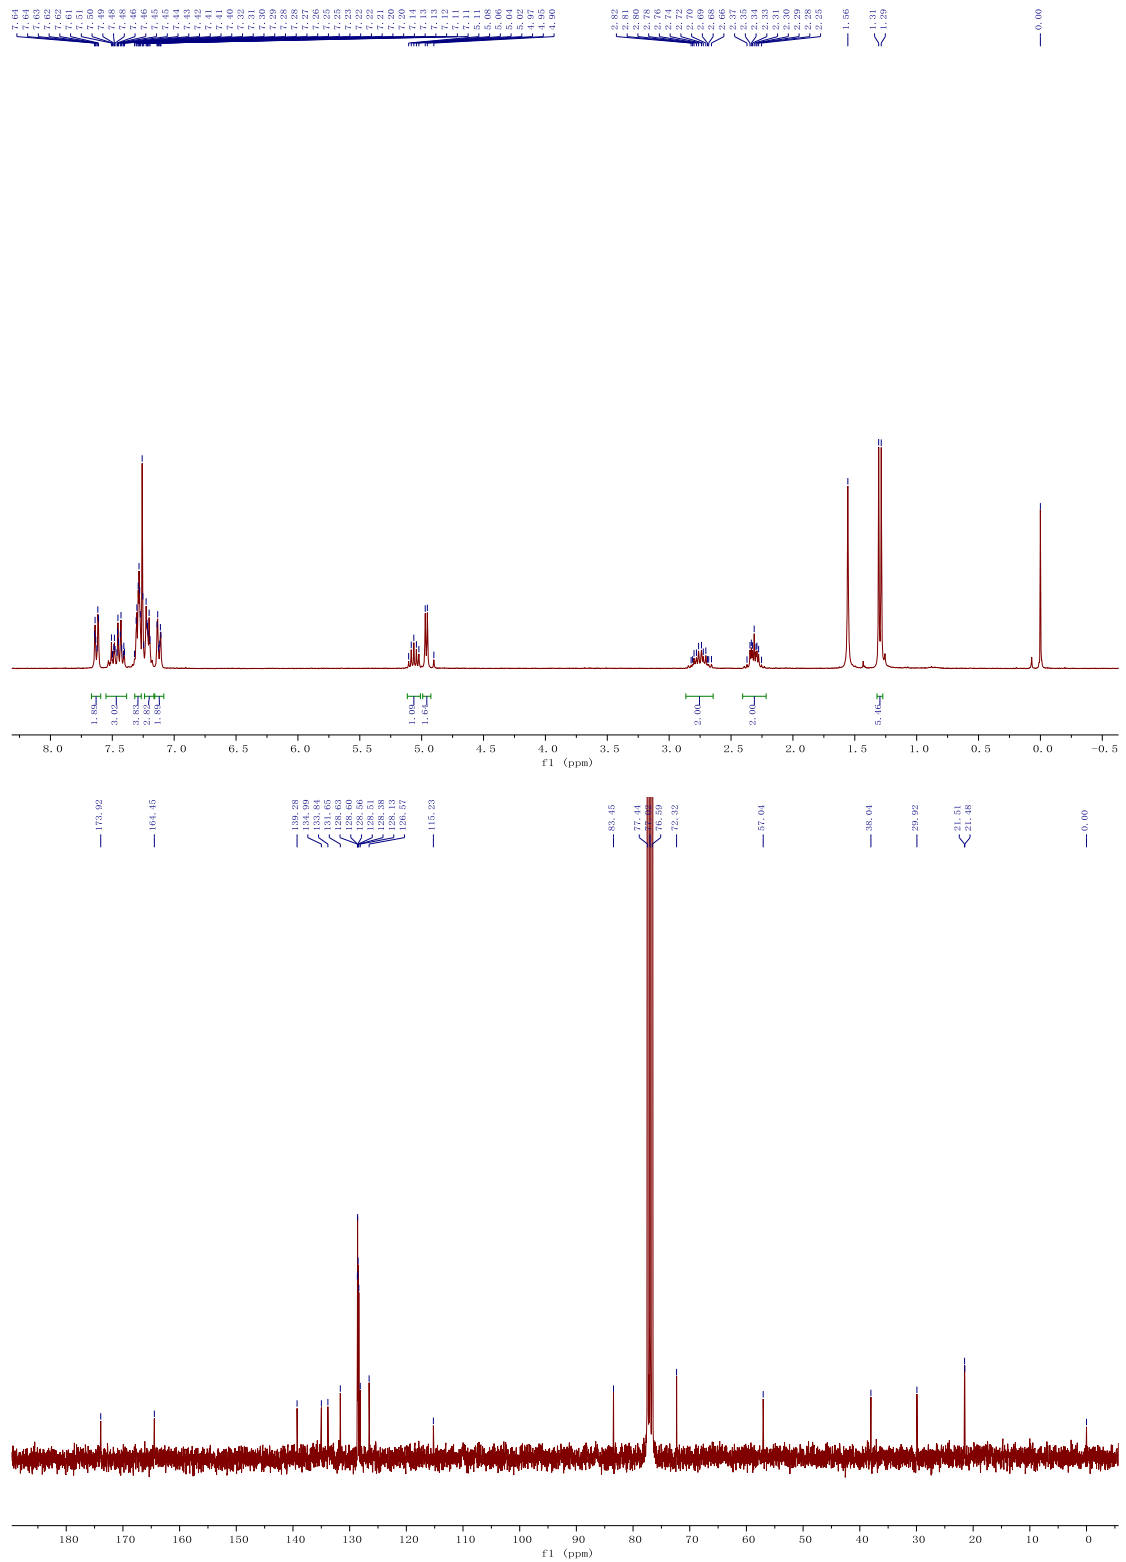

# isopropyl (R)-2-((N-benzylbenzamido)oxy)-2-cyano-5-phenylpentanoate (4r)

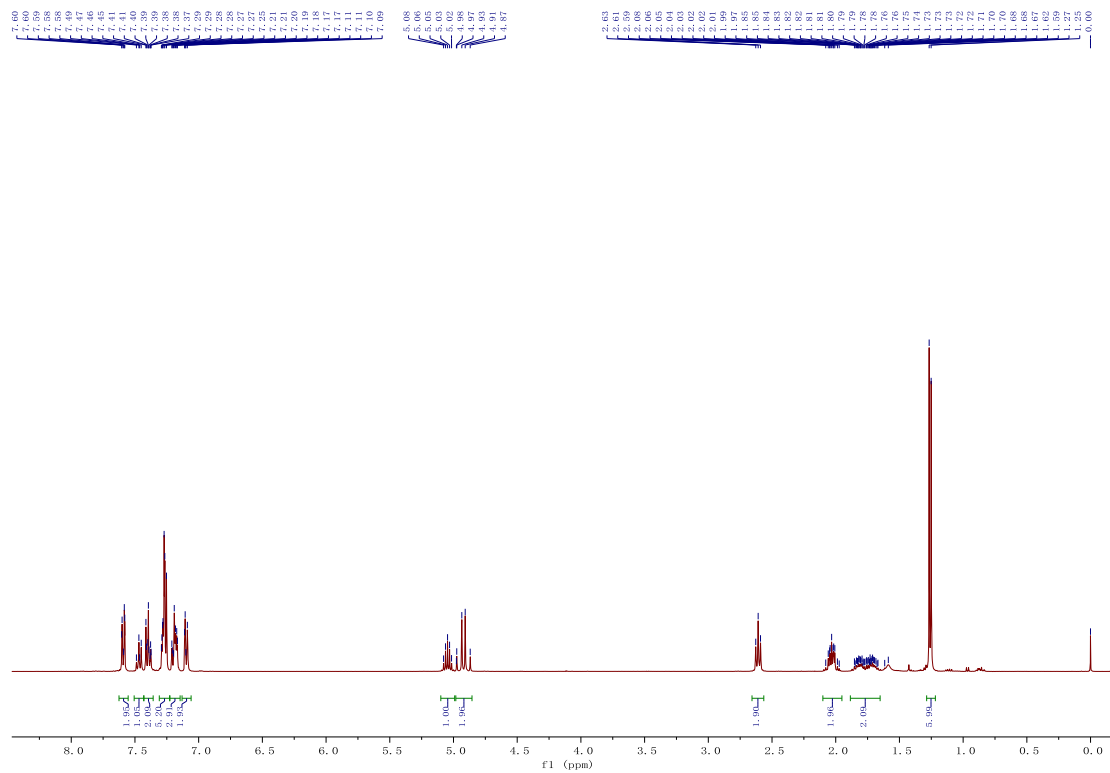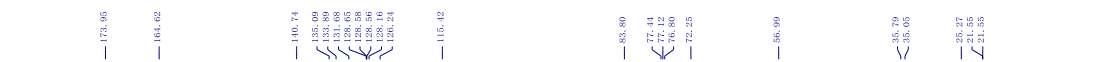

# isopropyl (R)-2-((N-benzylbenzamido)oxy)-2-cyanopropanoate (4s)

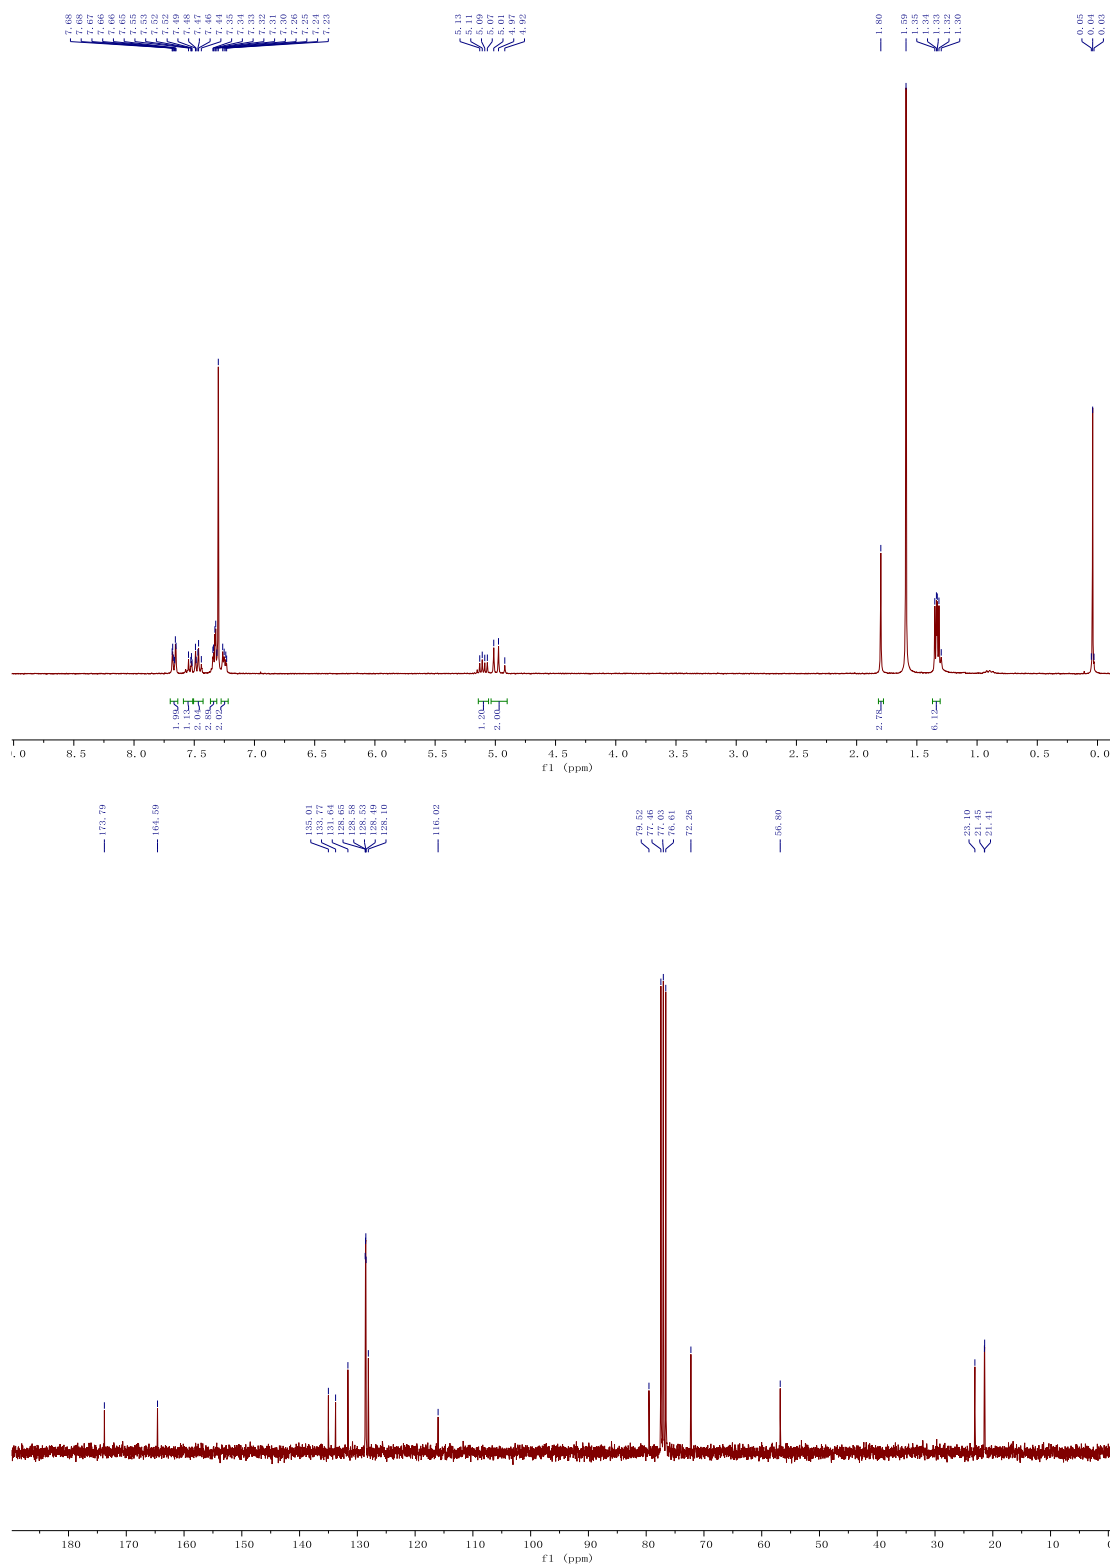



isopropyl (R)-2-((N-benzylbenzamido)oxy)-2-cyanobutanoate (4t)

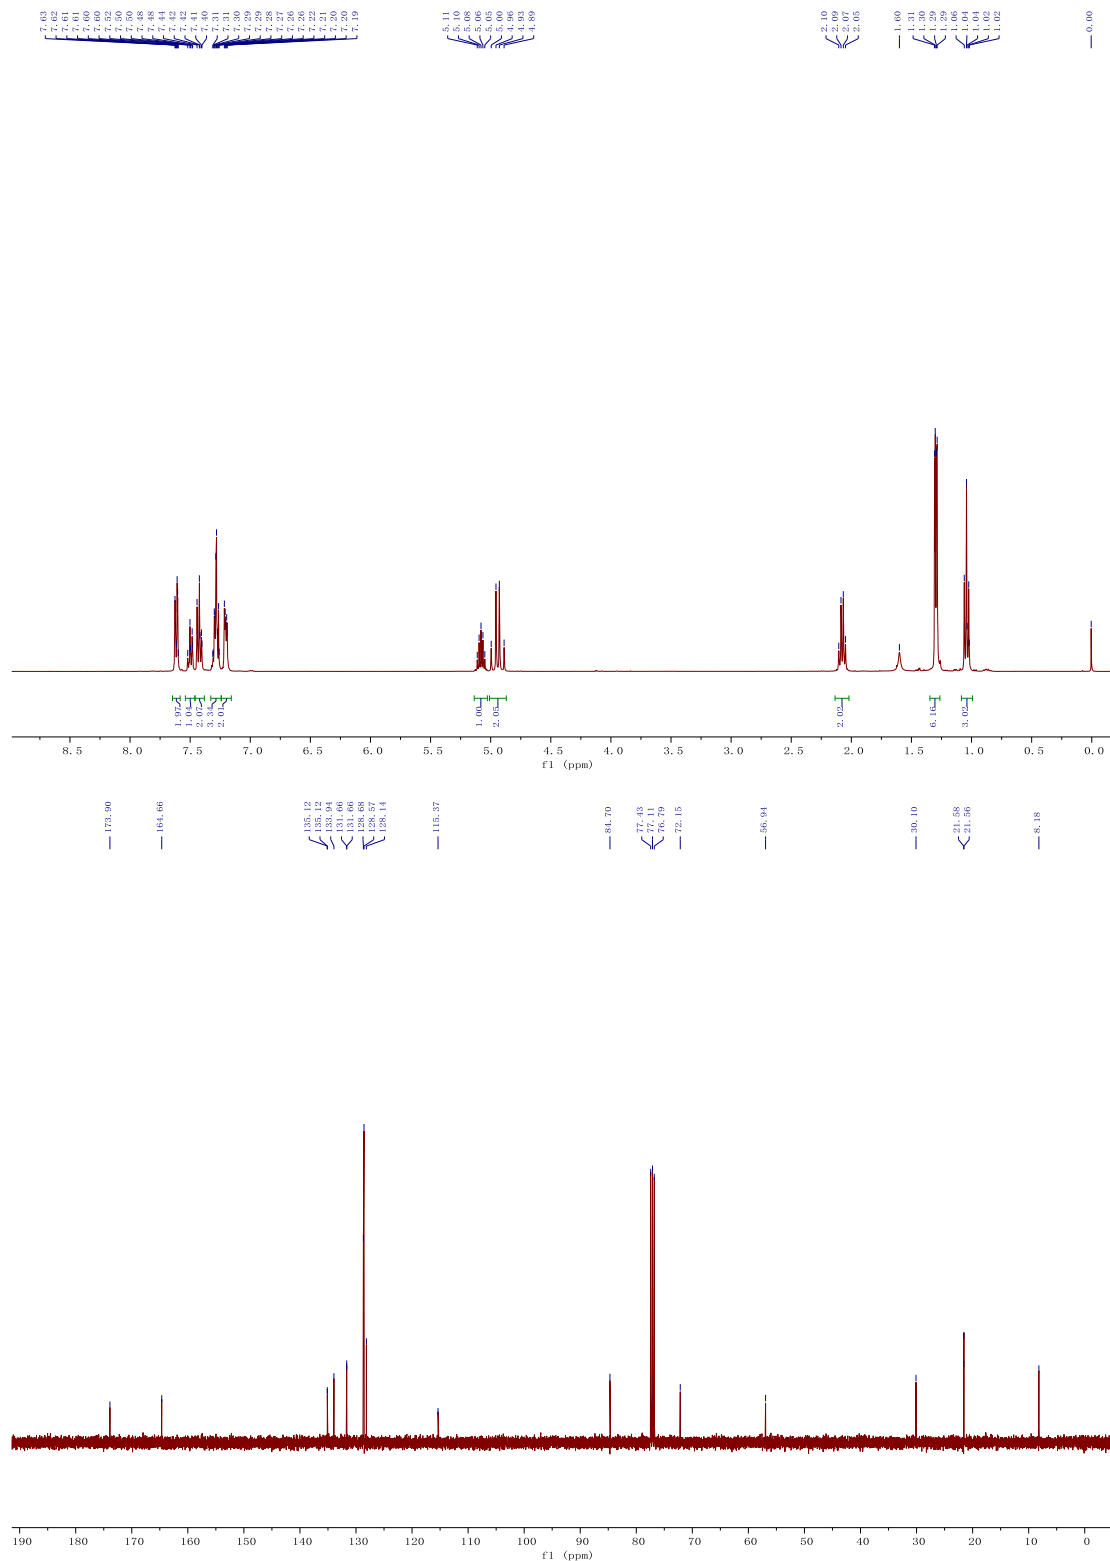

# isopropyl (R)-2-((N-benzylbenzamido)oxy)-2-cyano-5-methylhexanoate (4u)

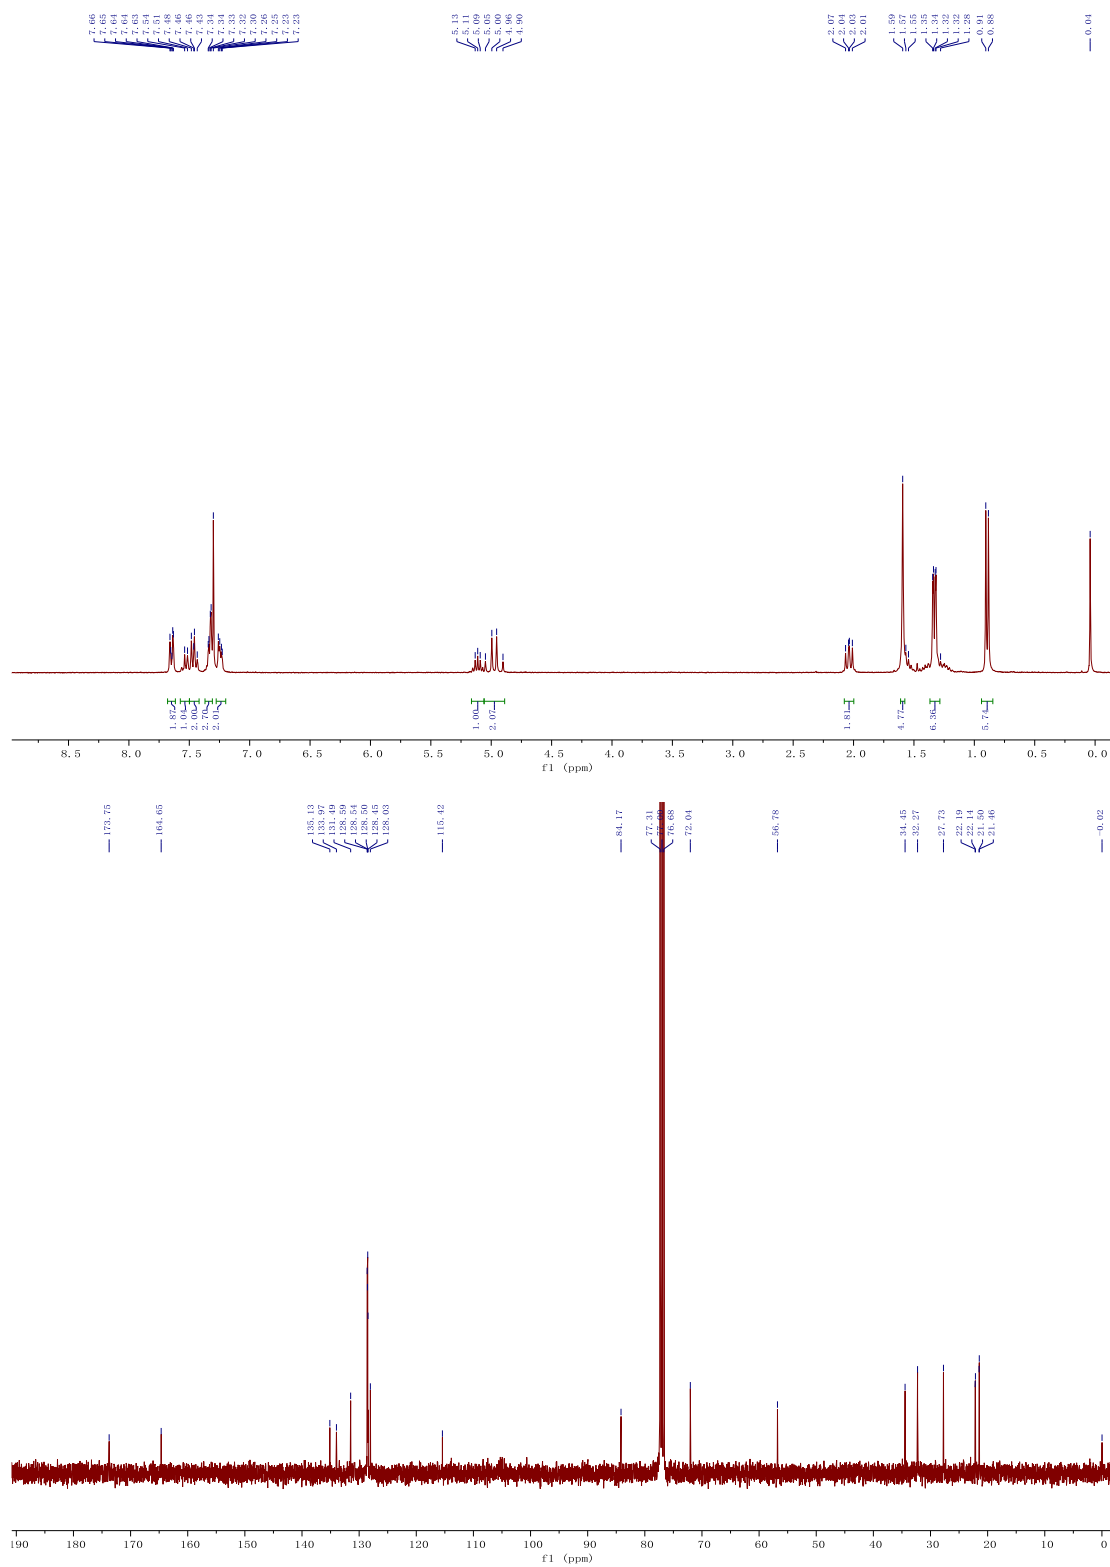

isopropyl (R)-2-((N-benzylbenzamido)oxy)-2-cyanopent-4-enoate (4v)

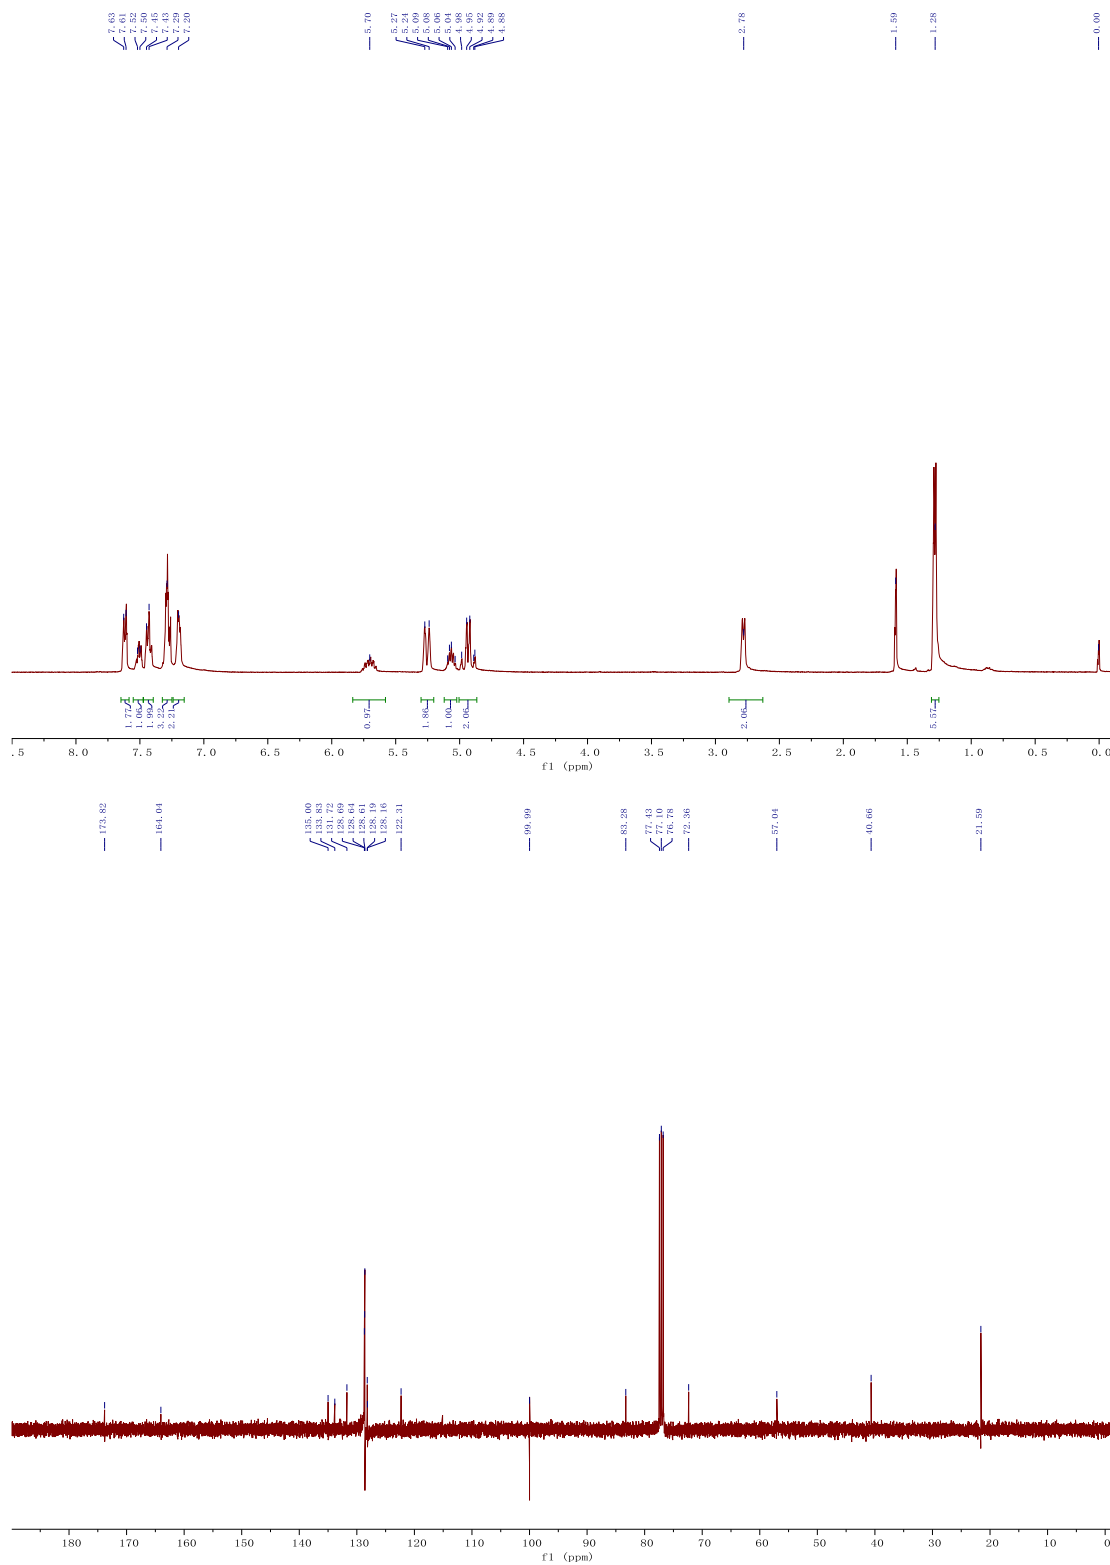

# isopropyl 2-((N-benzylbenzamido)oxy)-2-cyano-4-methylpent-4-enoate (4w)

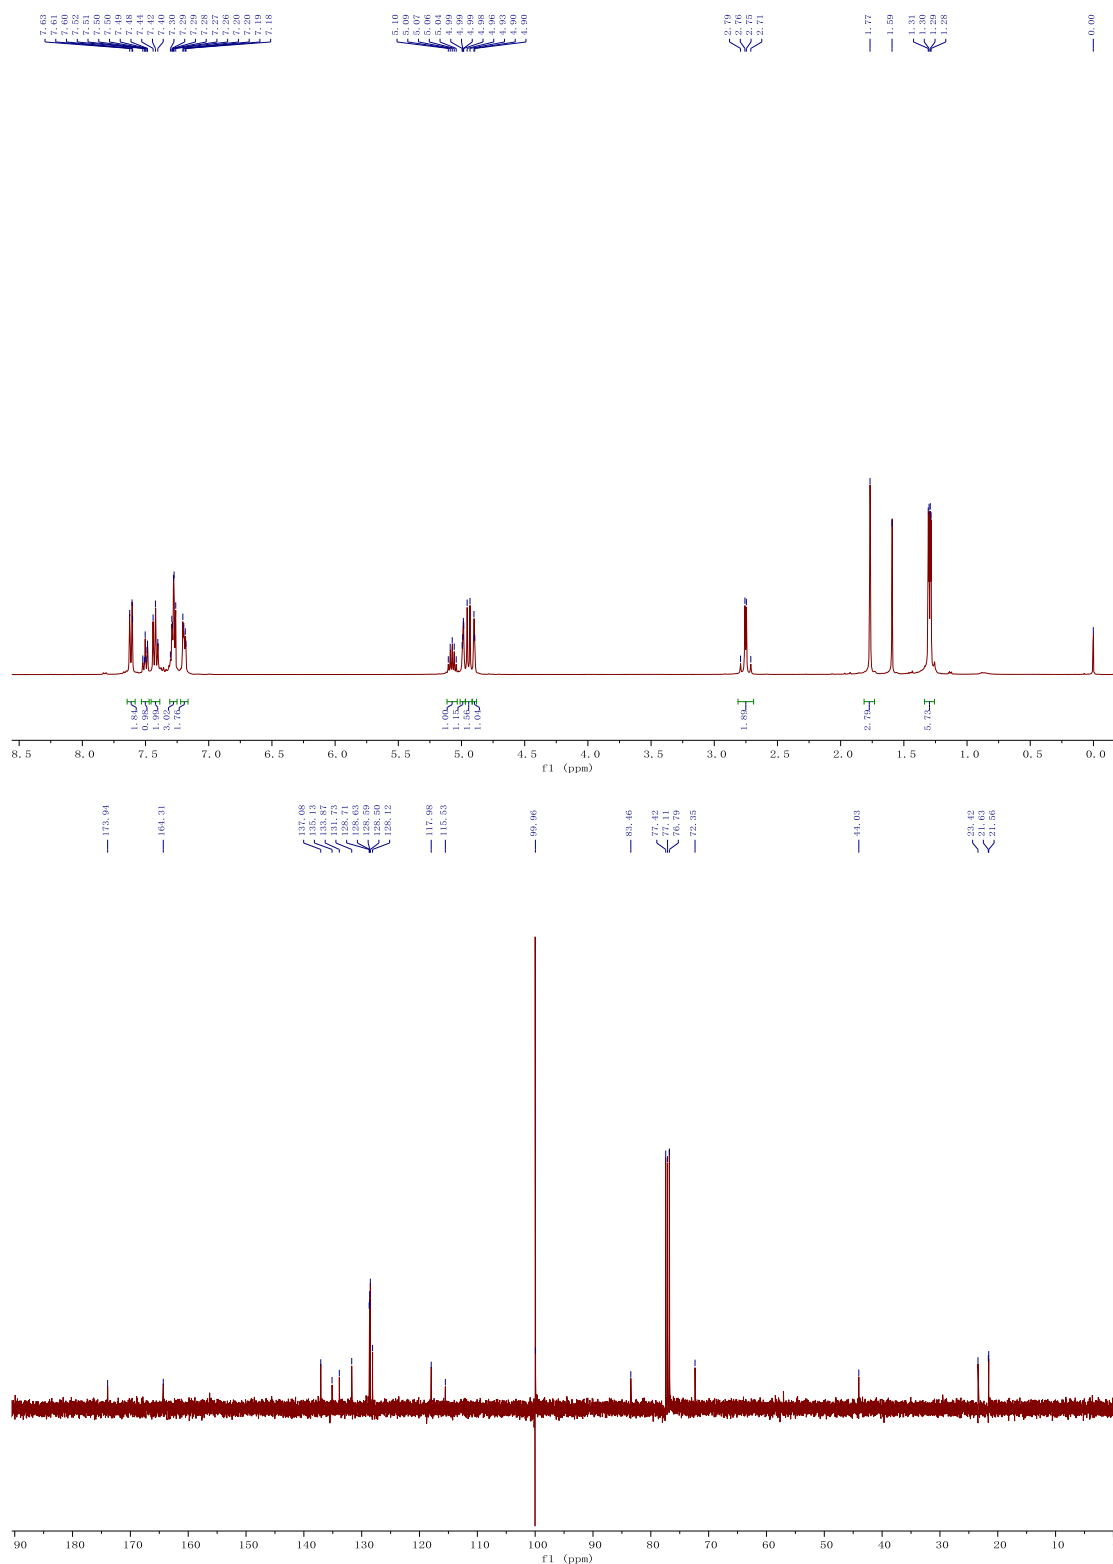

# isopropyl (R)-2-((N-benzylbenzamido)oxy)-2-cyanohept-6-enoate (4x)

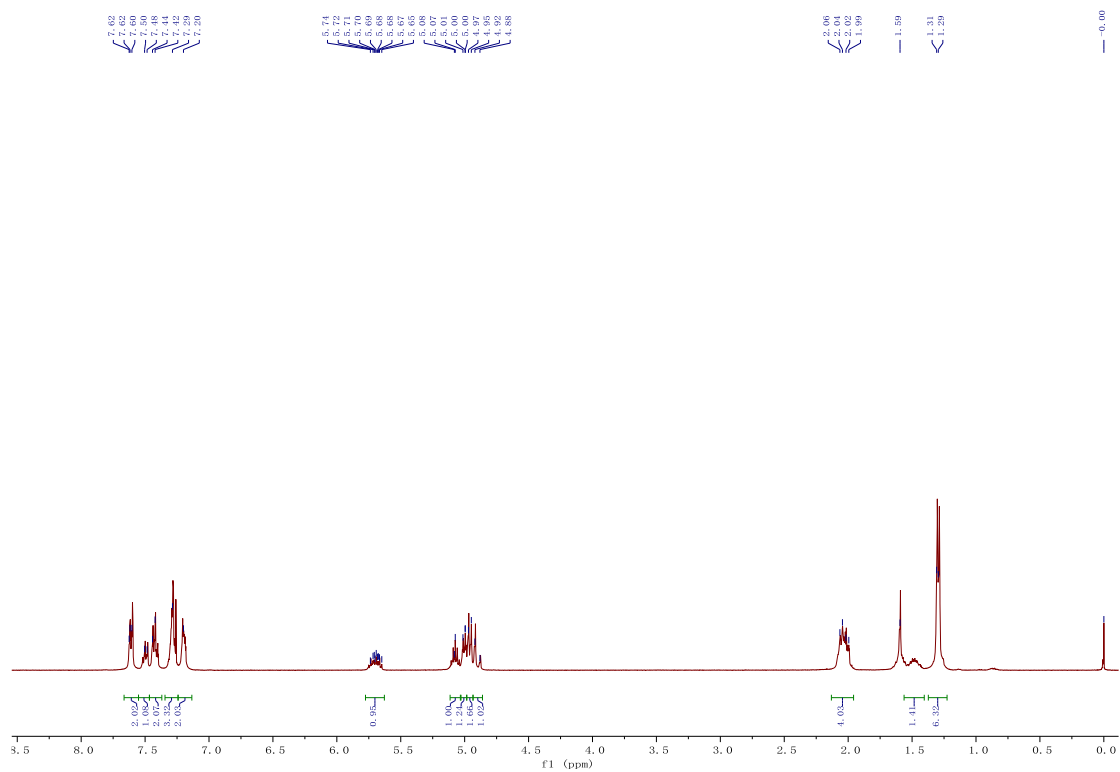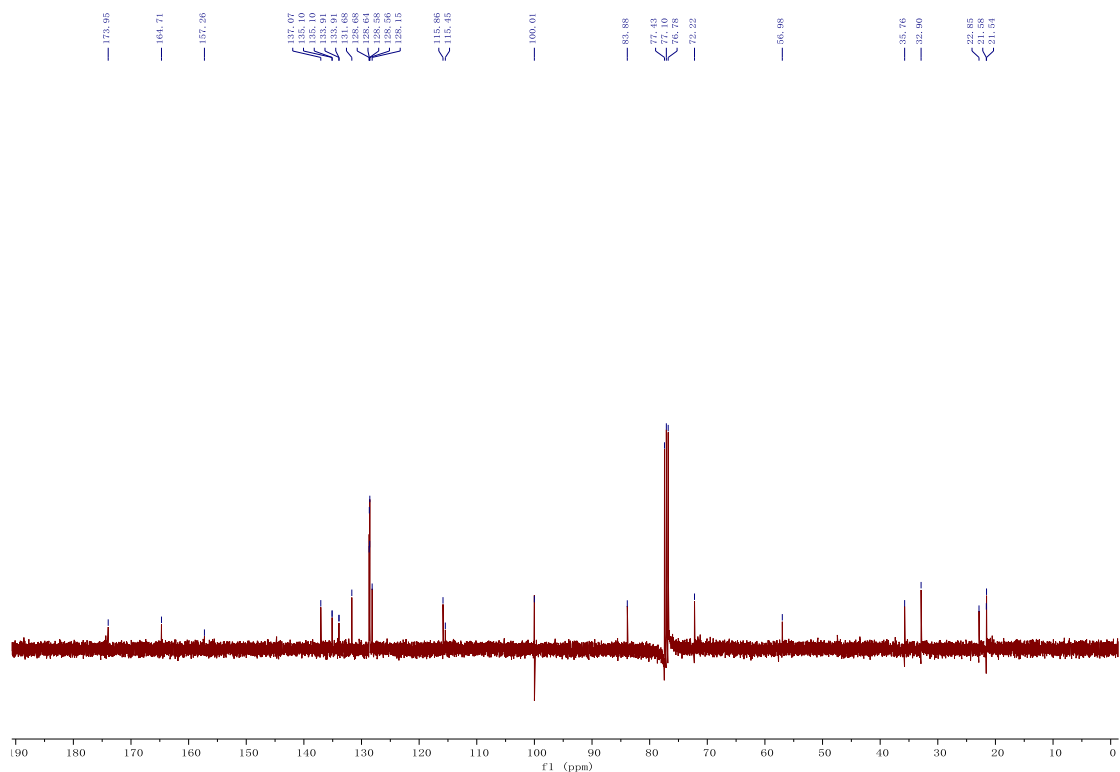

isopropyl (R)-2-((N-benzylbenzamido)oxy)-2-cyanooct-7-enoate (4y)

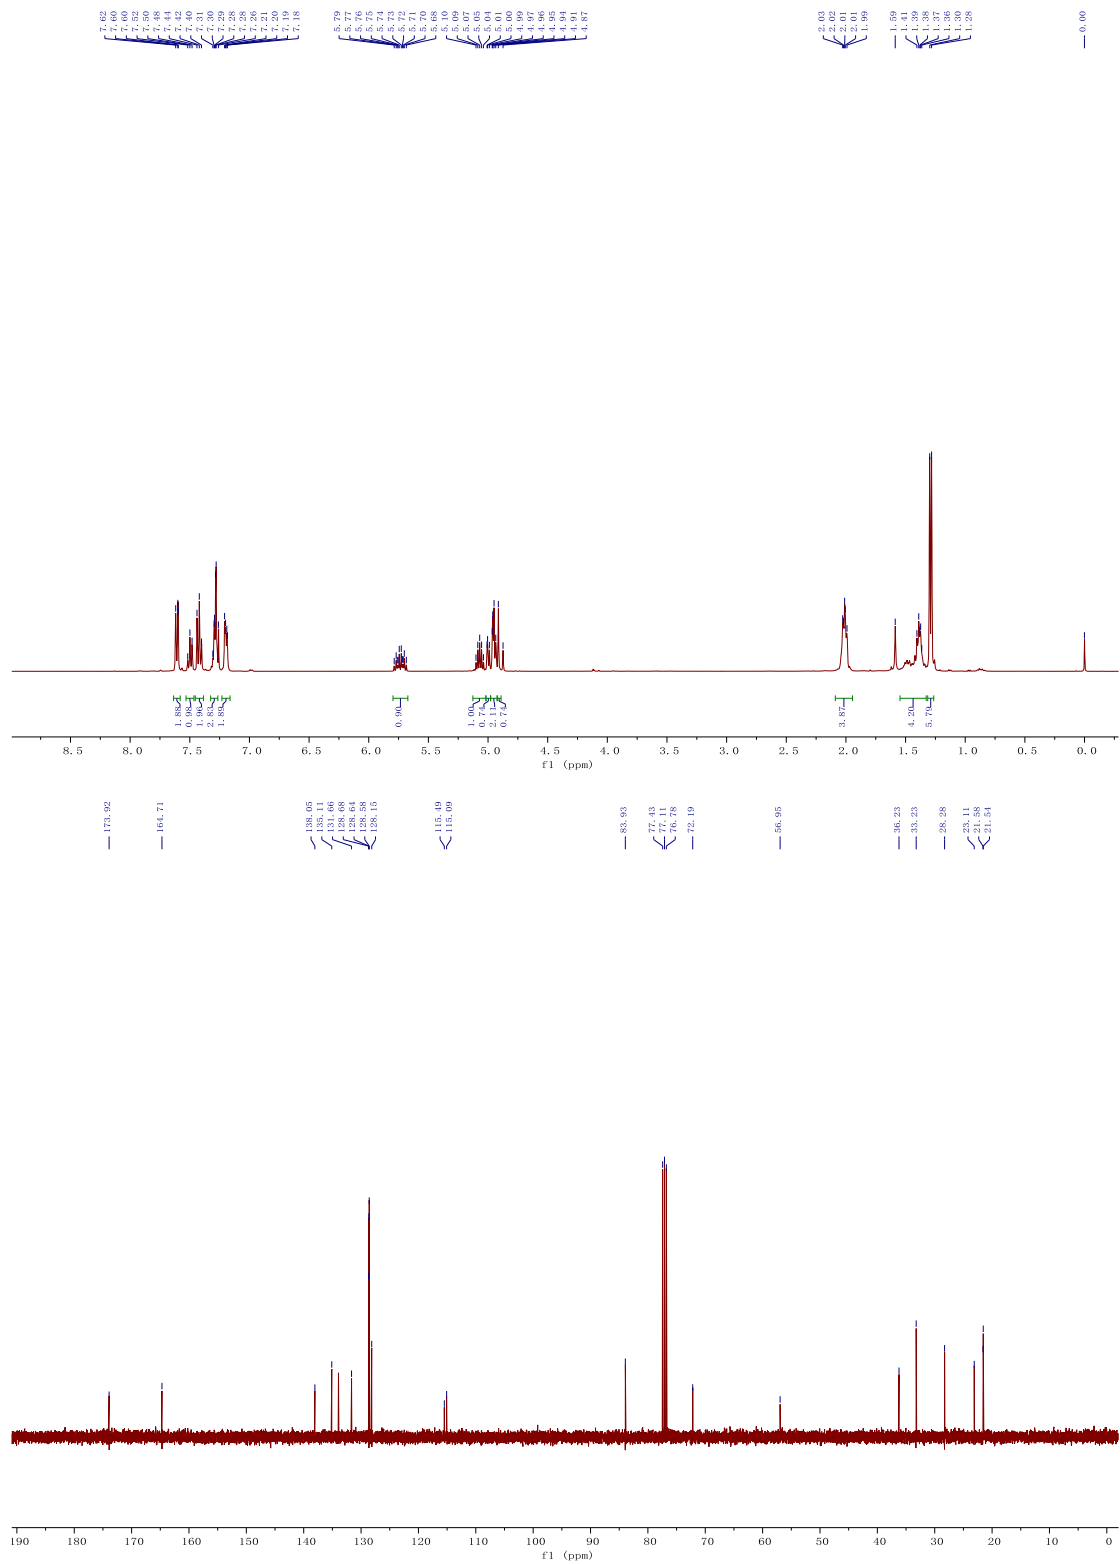

# isopropyl (R)-2-cyano-2-(4-methoxyphenoxy)-4-phenylbutanoate (6a)

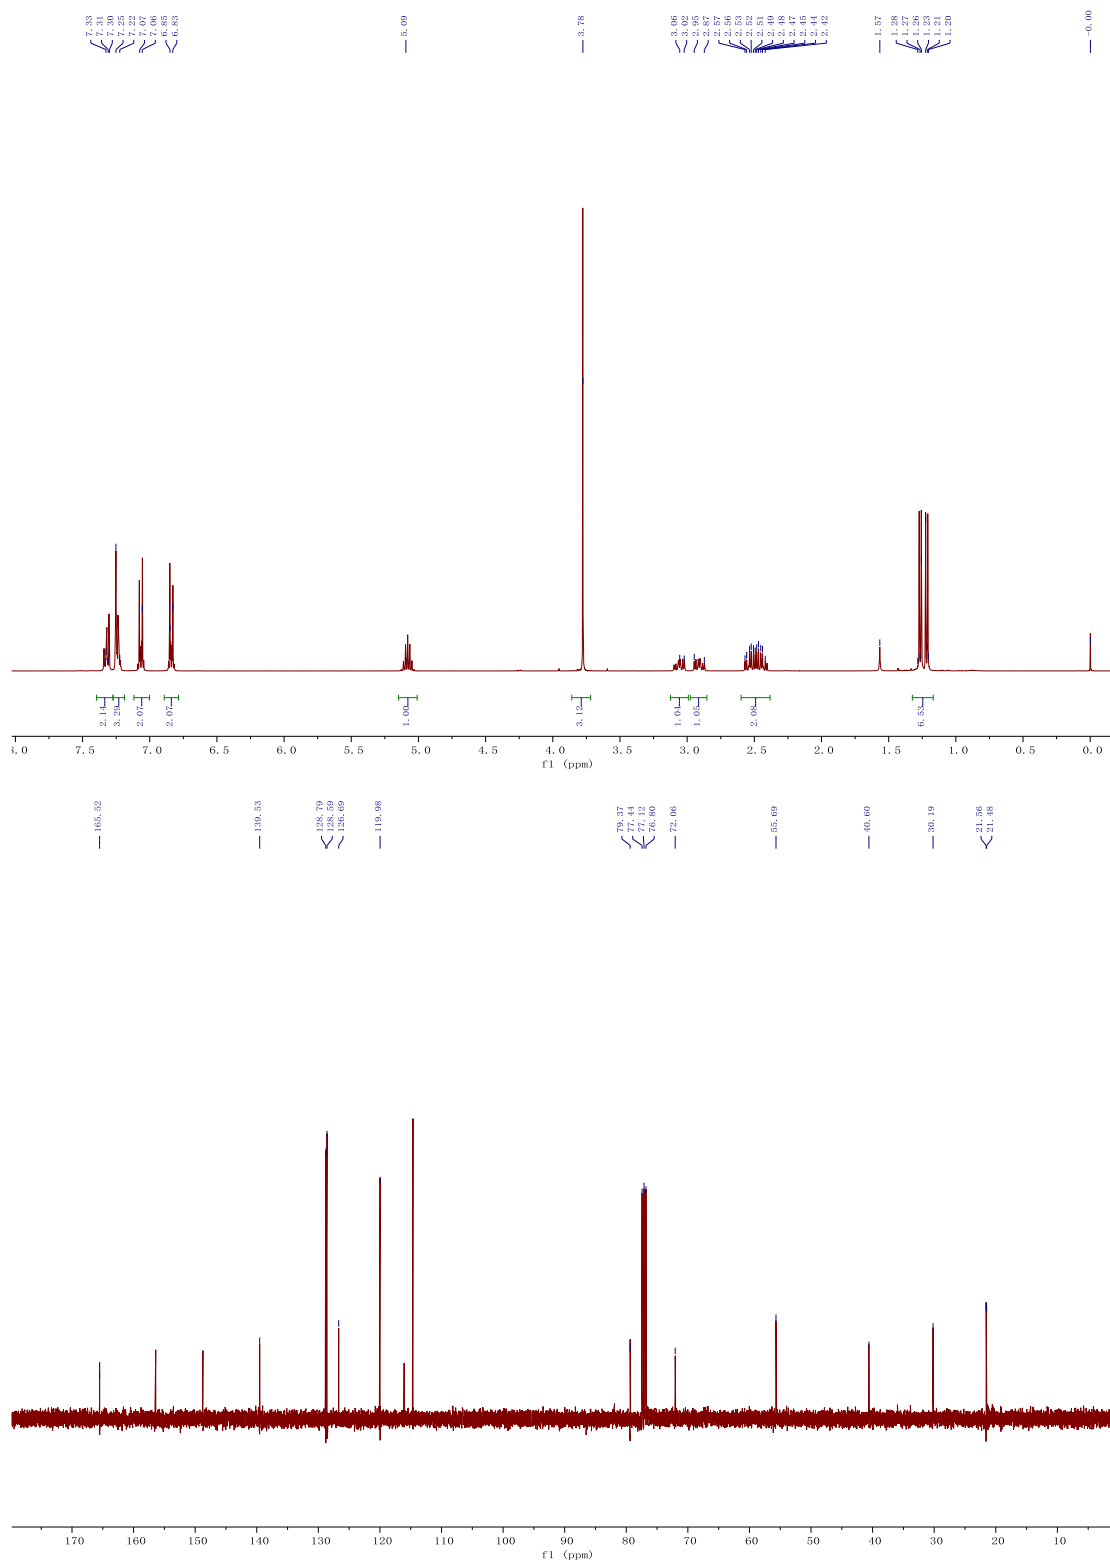

**isopropyl (R)-2-cyano-2-(4-methoxyphenoxy)pent-4-enoate (6b)**

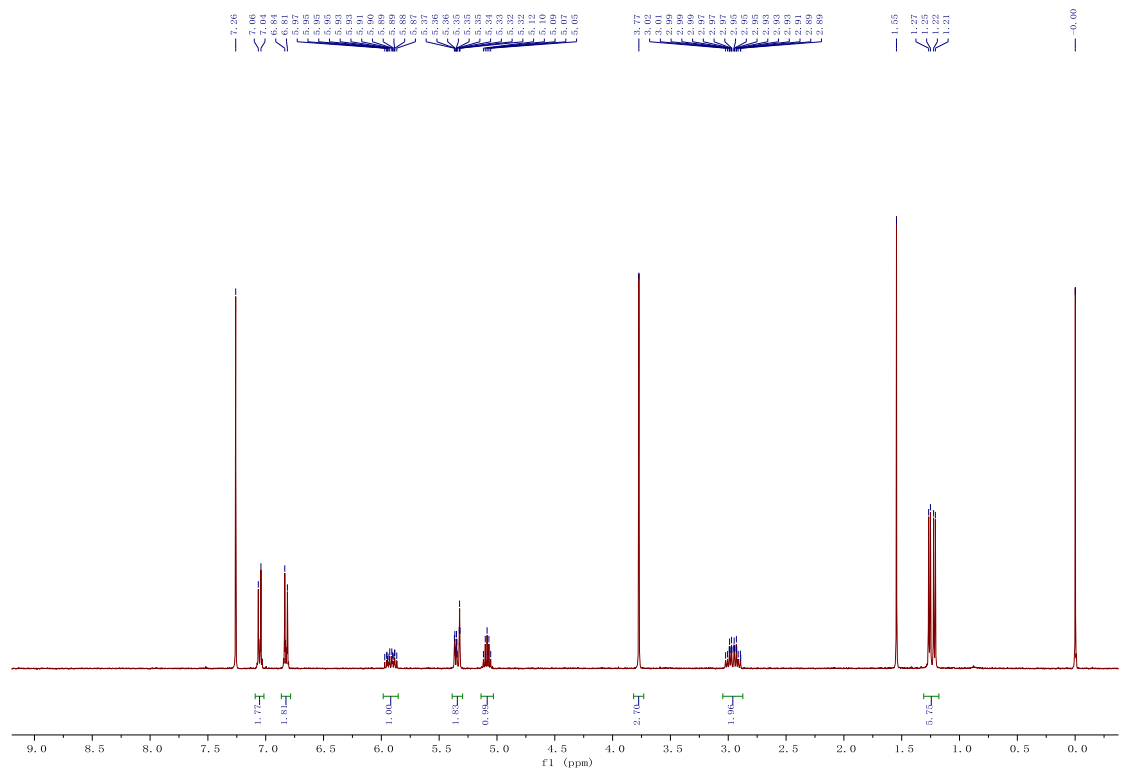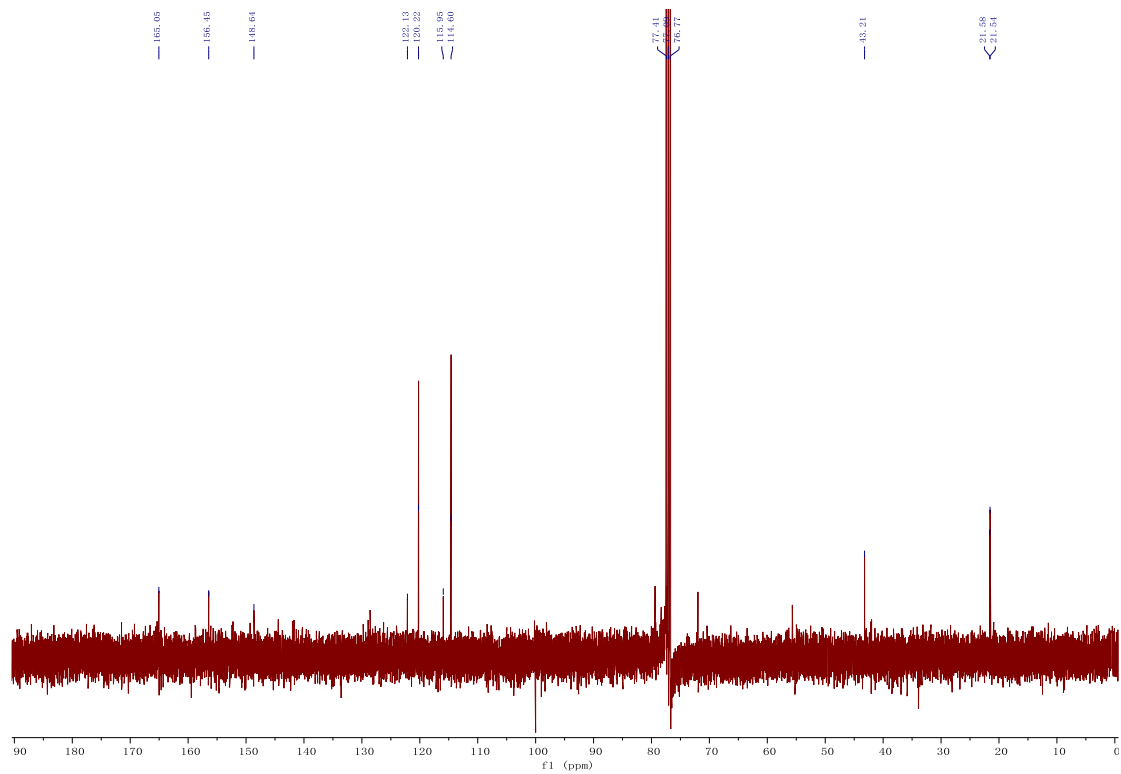



isopropyl (R)-2-cyano-2-(4-methoxyphenoxy)hept-6-enoate (6c)

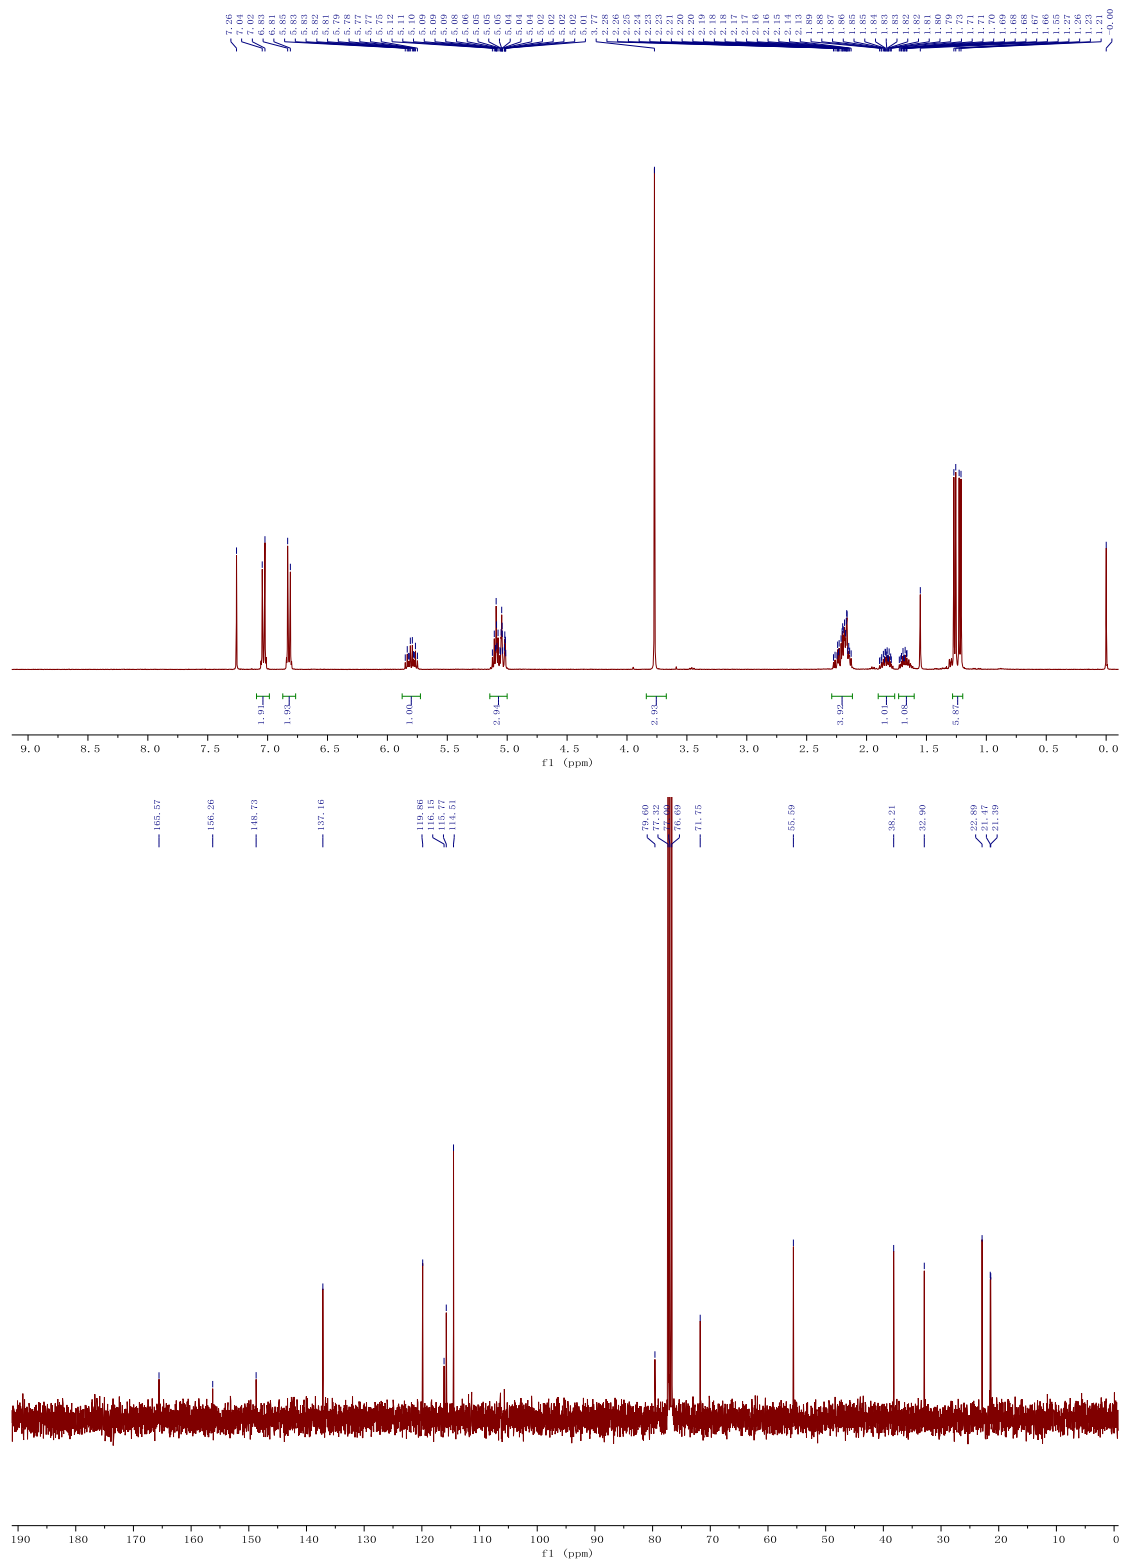

# isopropyl (R)-2-cyano-2-(4-methoxyphenoxy)oct-7-enoate (6d)

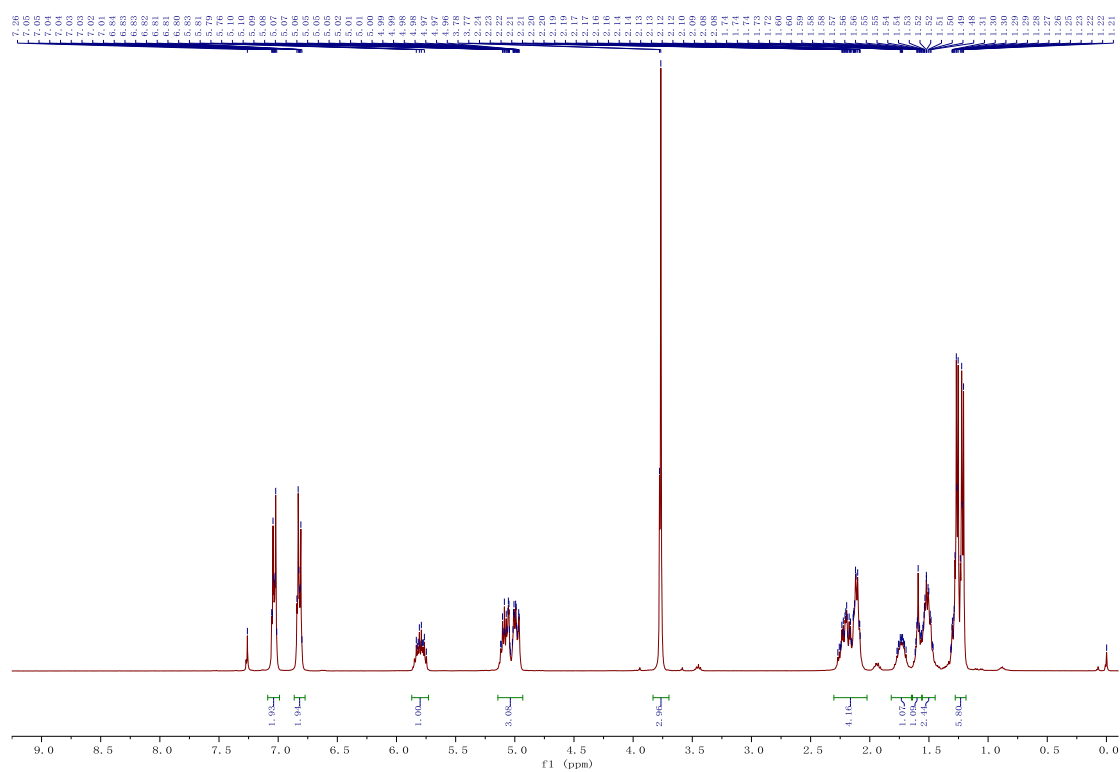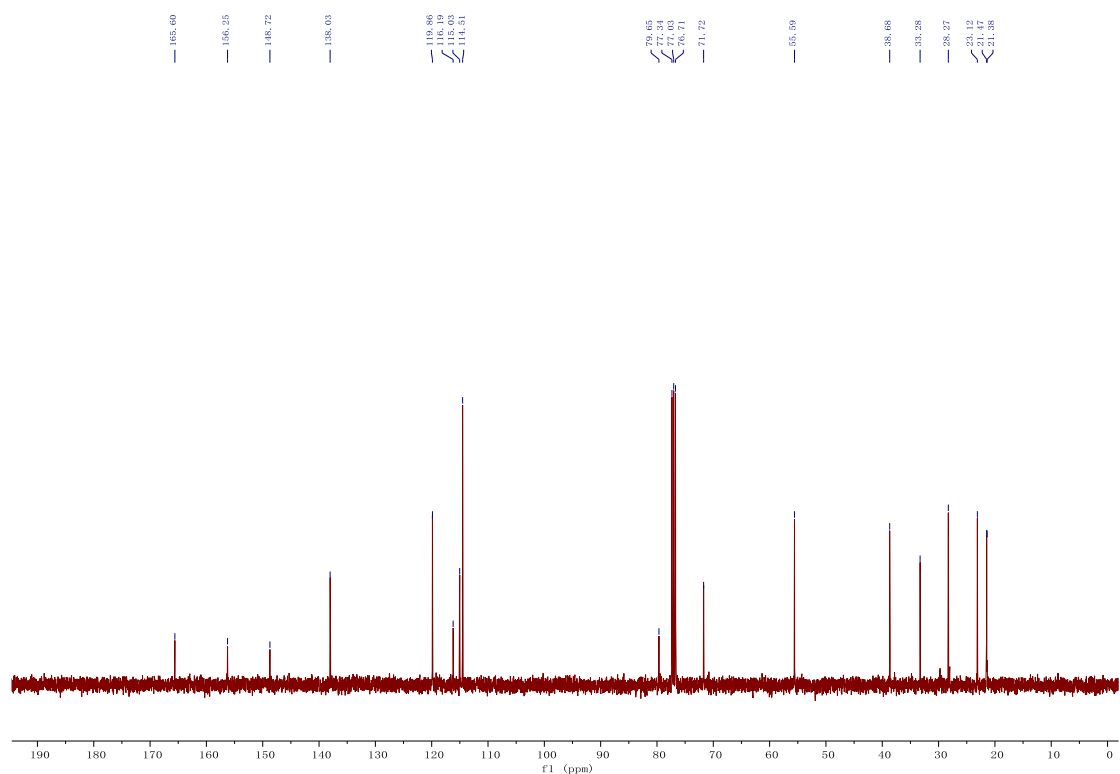

# isopropyl (R)-2-cyano-2-(4-methoxyphenoxy)hexanoate (6e)

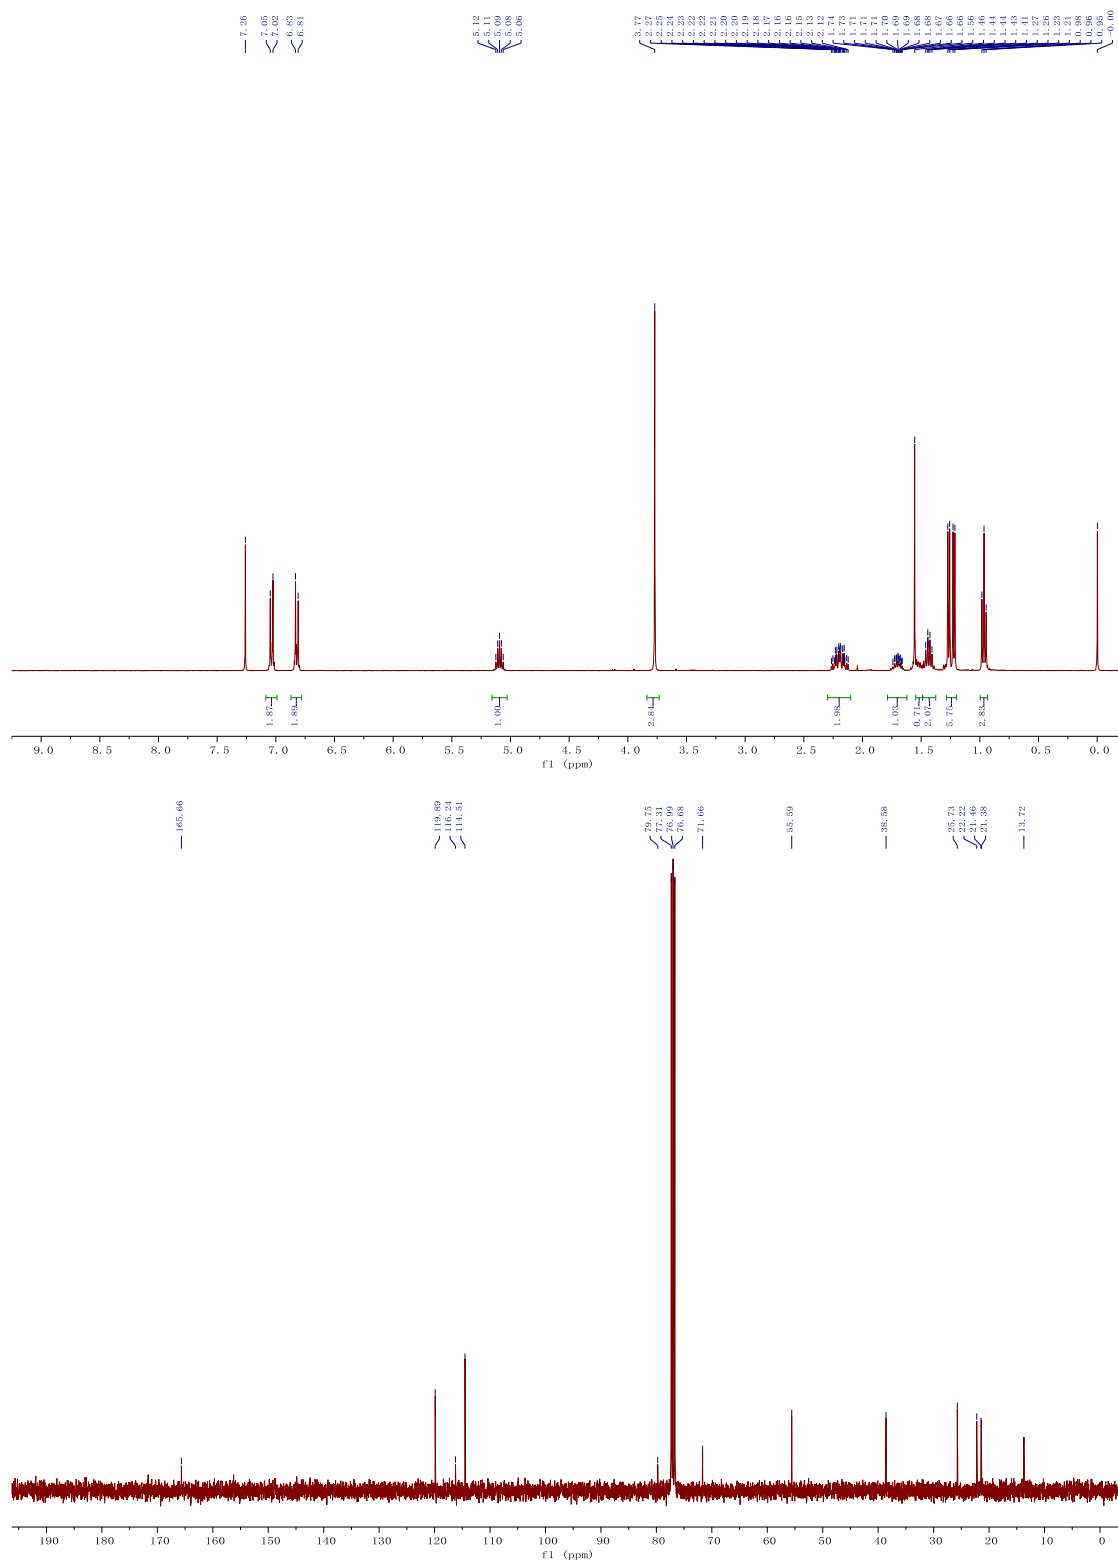

isopropyl (R)-2-cyano-2-(4-methoxyphenoxy)propanoate (6f)

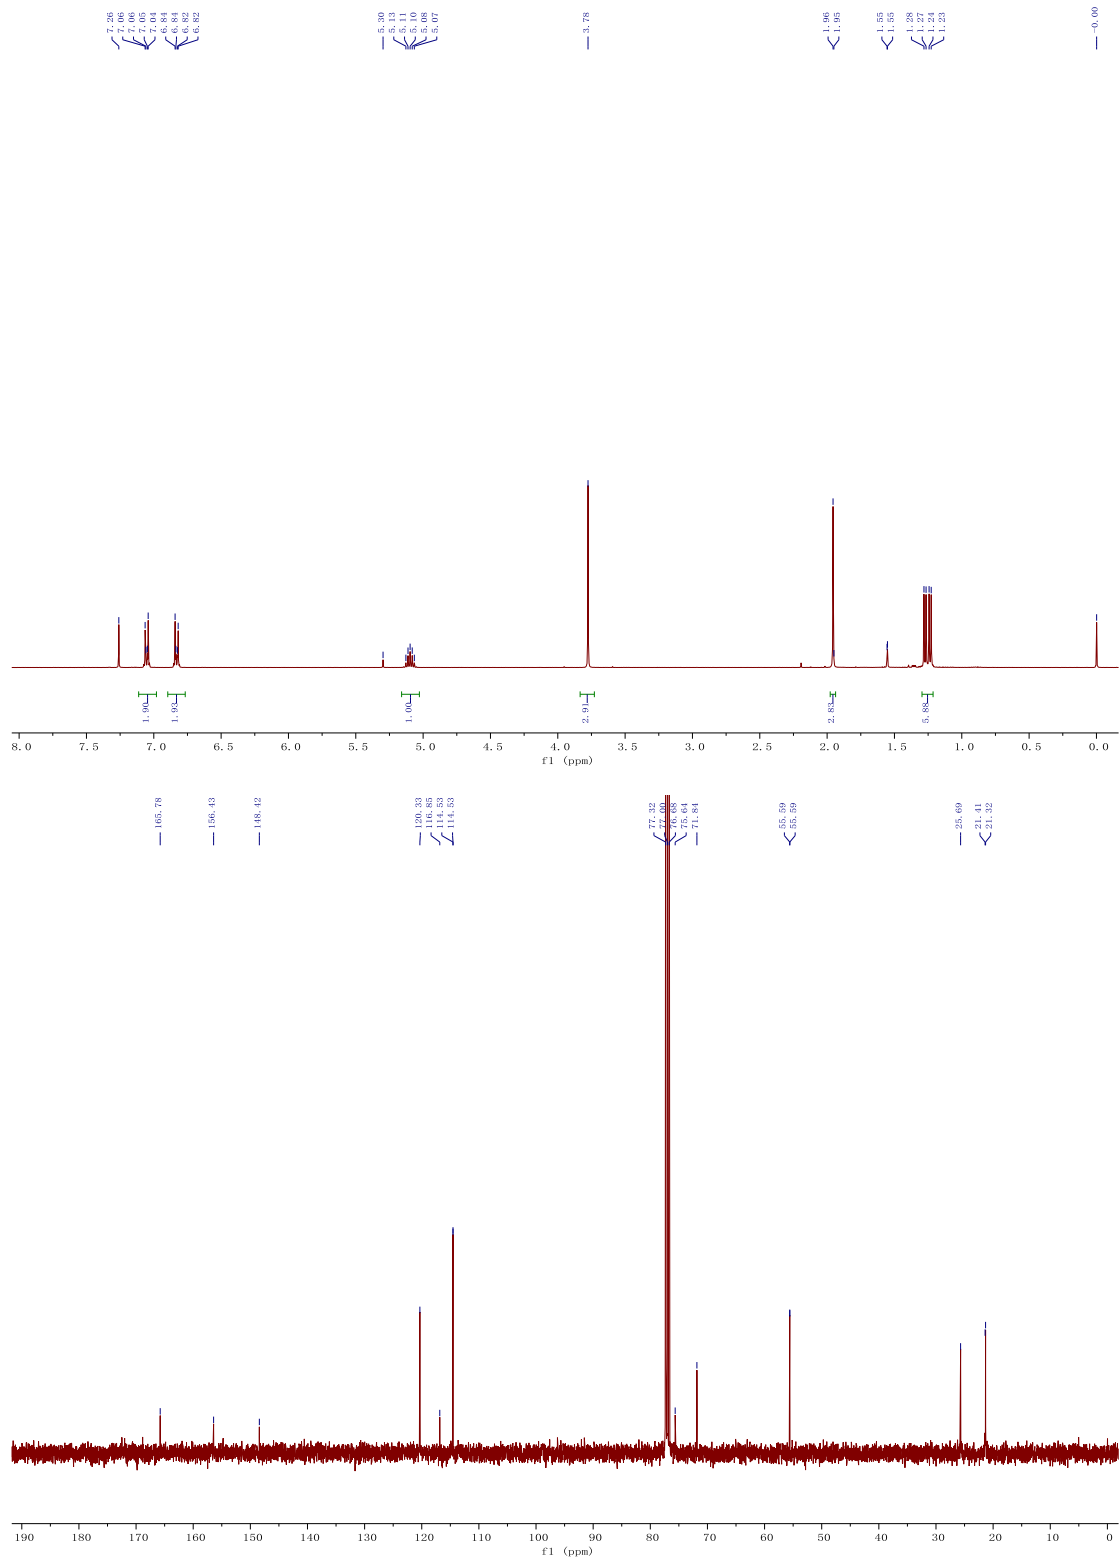

# isopropyl (R)-2-cyano-4-phenyl-2-(p-tolyloxy)butanoate (6g)

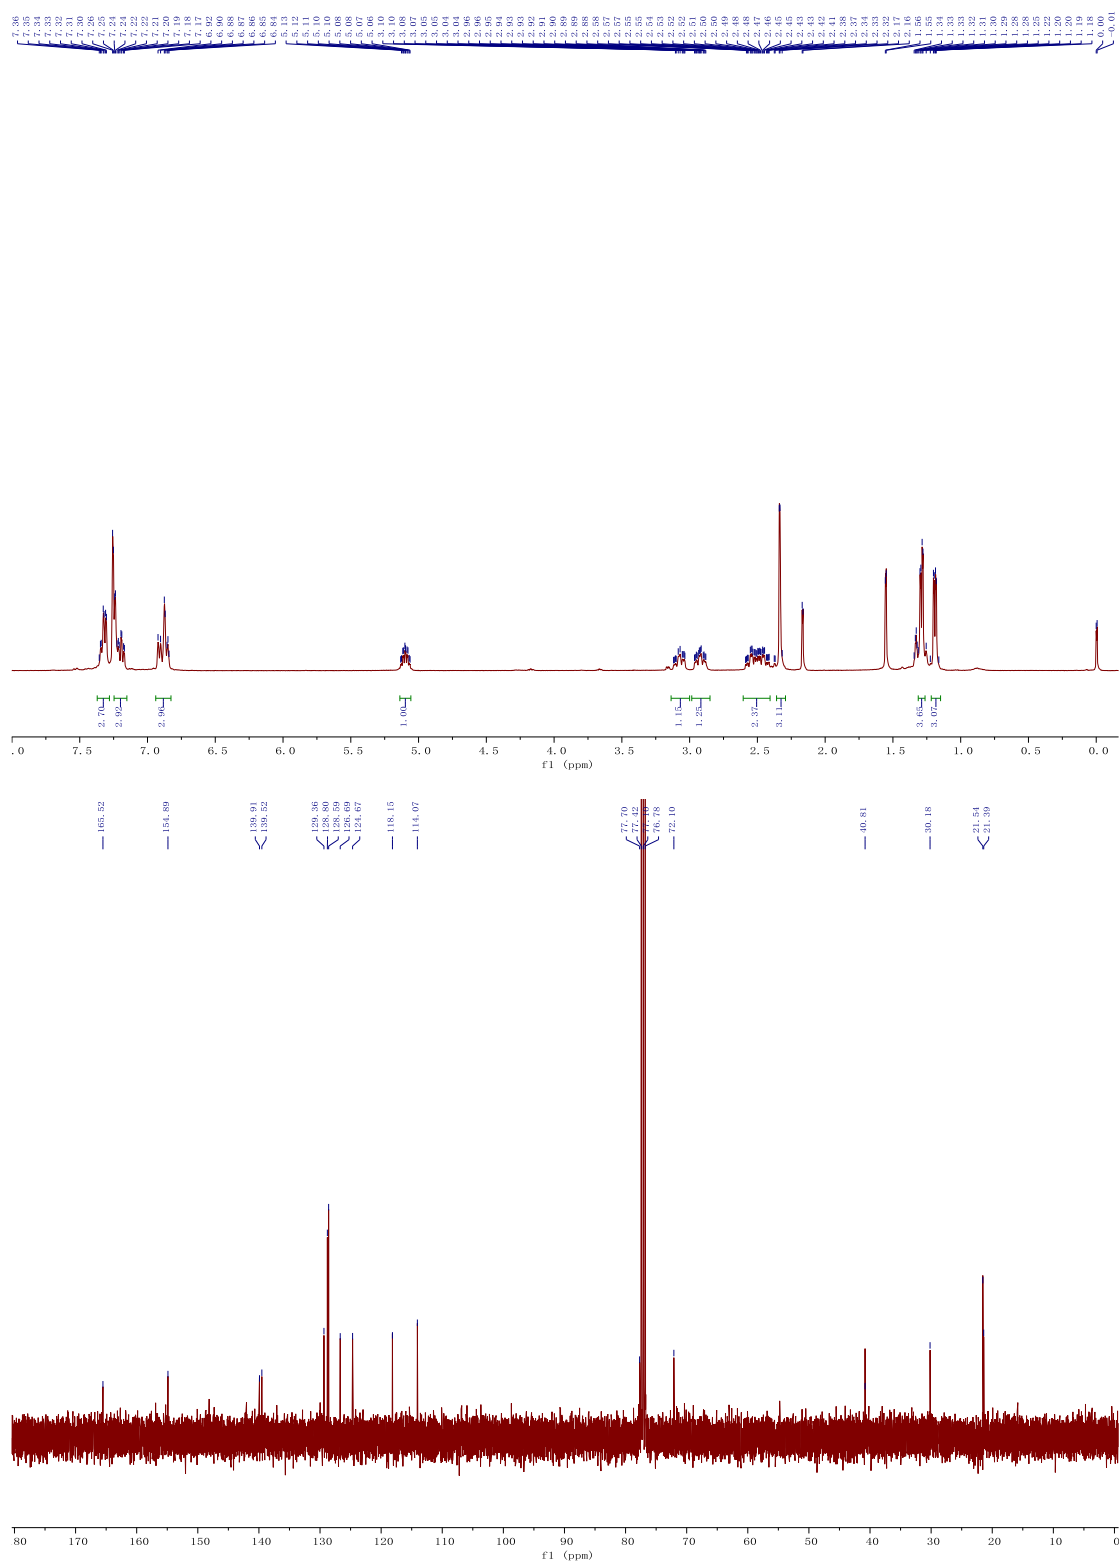

isopropyl (R)-2-cyano-2-(p-tolyloxy)hexanoate (6h)

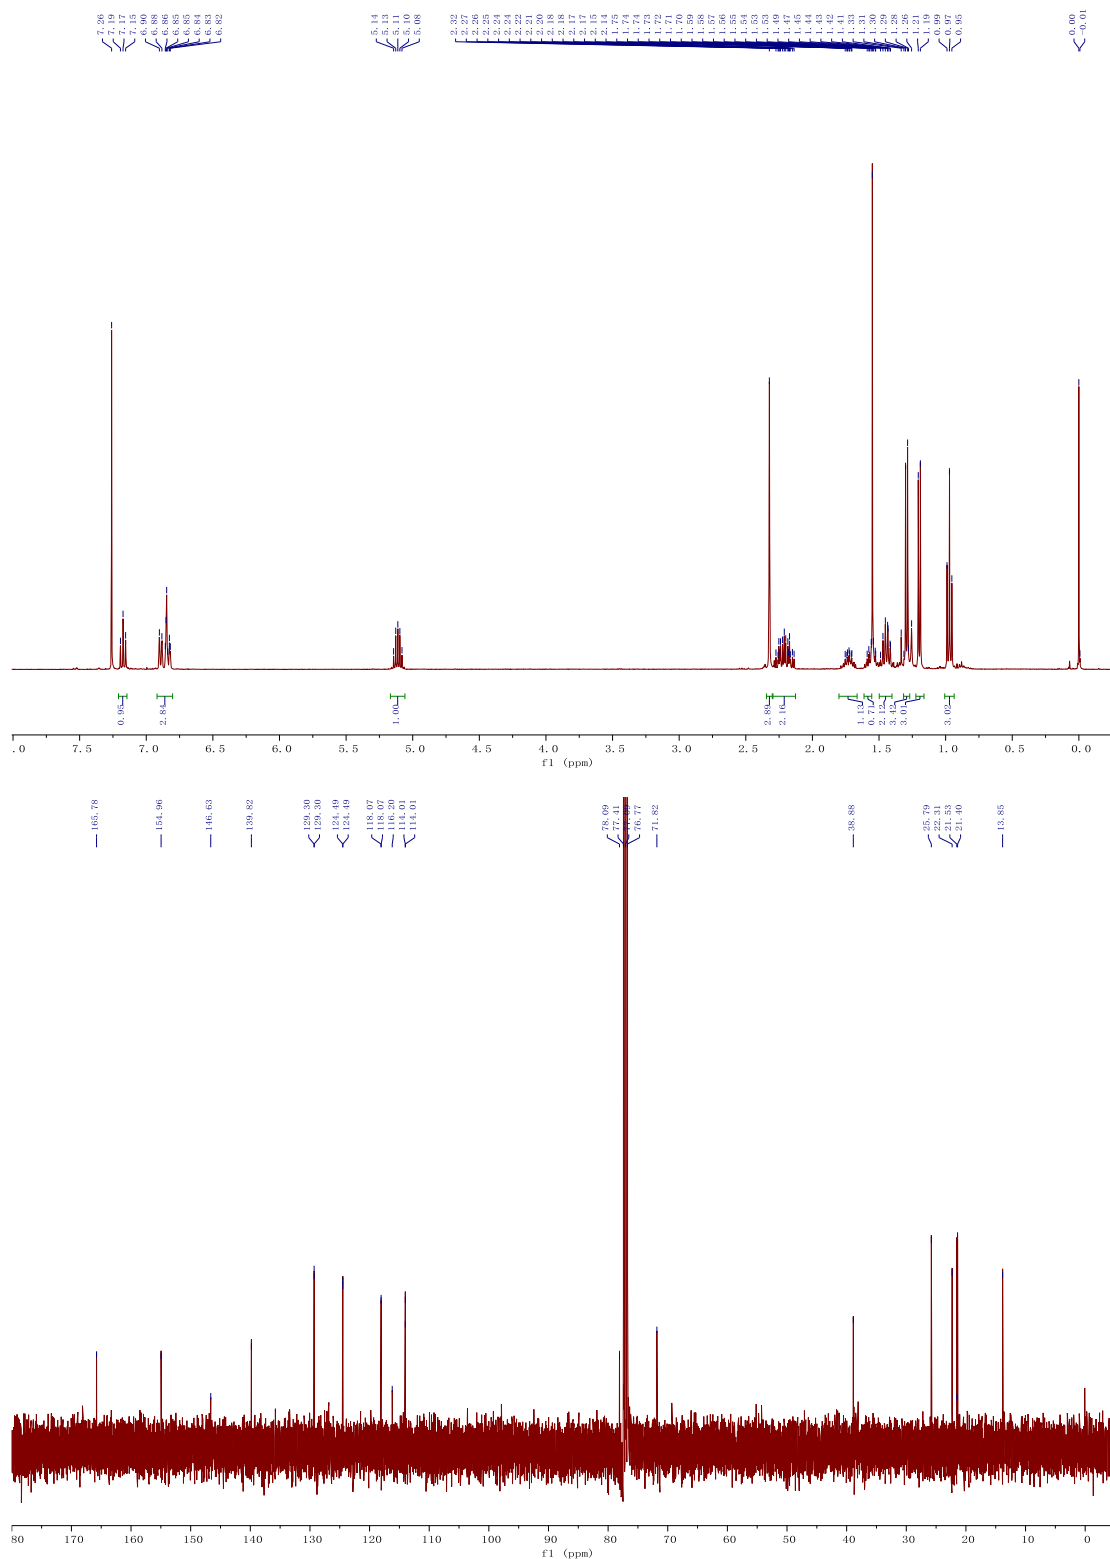

# isopropyl (R)-2-cyano-2-(p-tolyloxy)hept-6-enoate (6i)

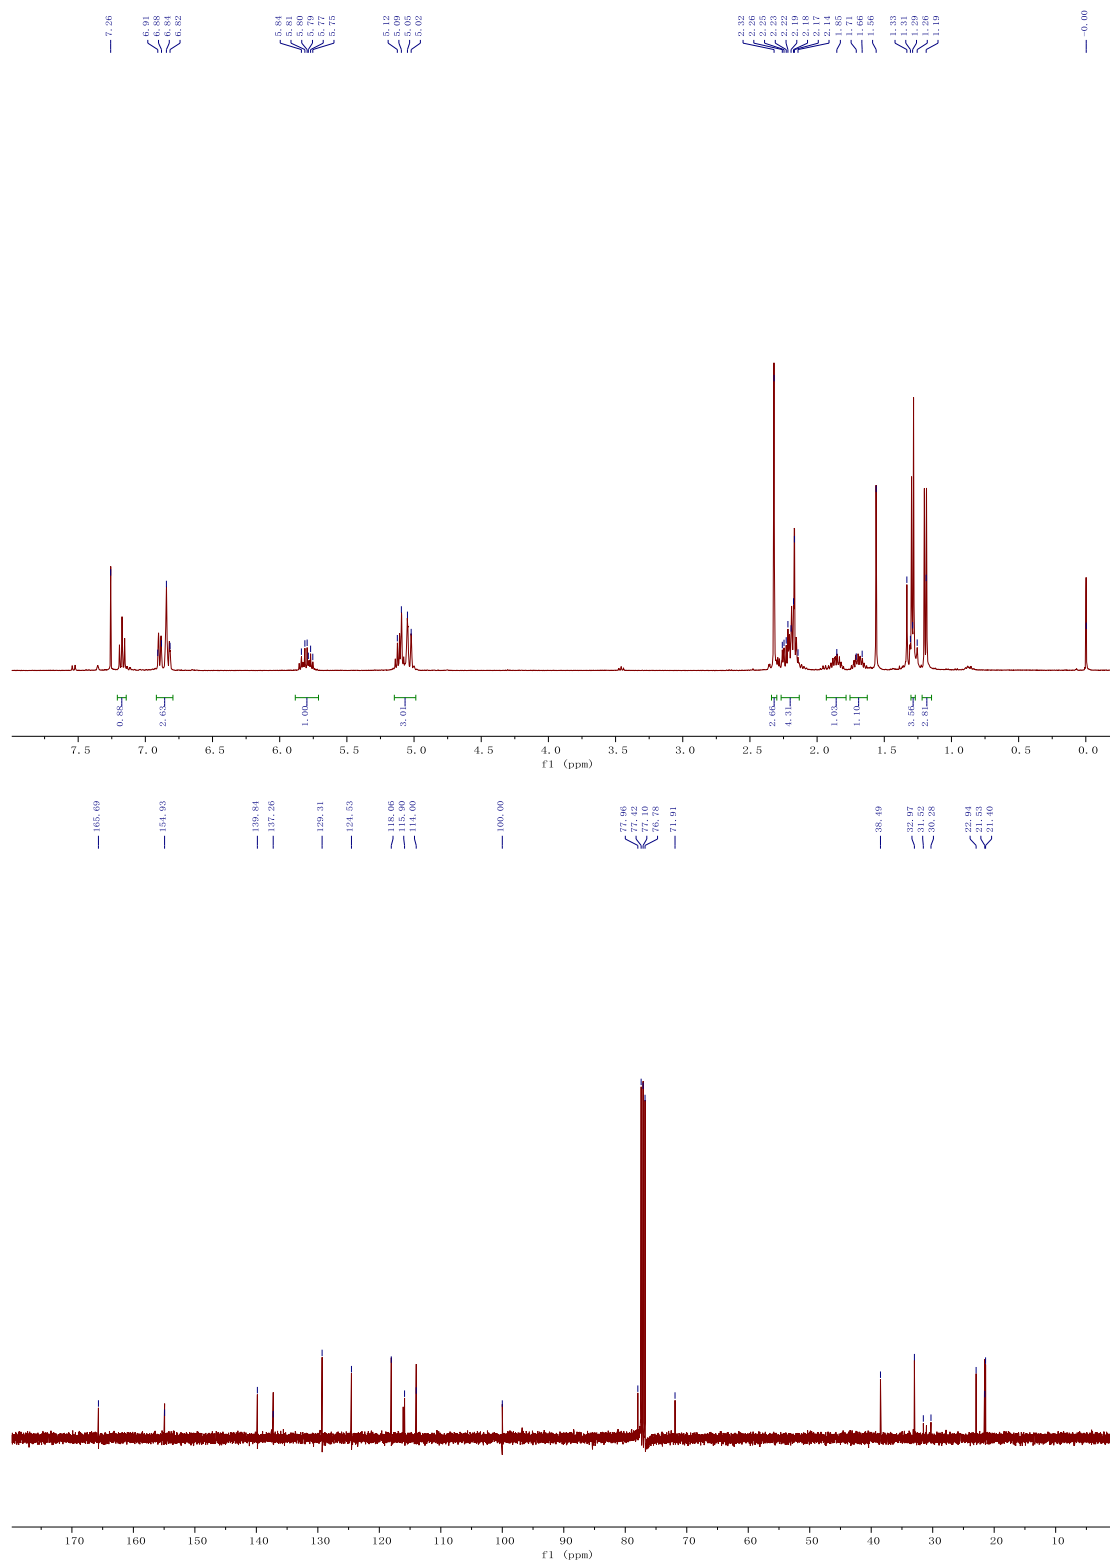

# isopropyl (R)-2-cyano-2-(p-tolyloxy)oct-7-enoate (6j)

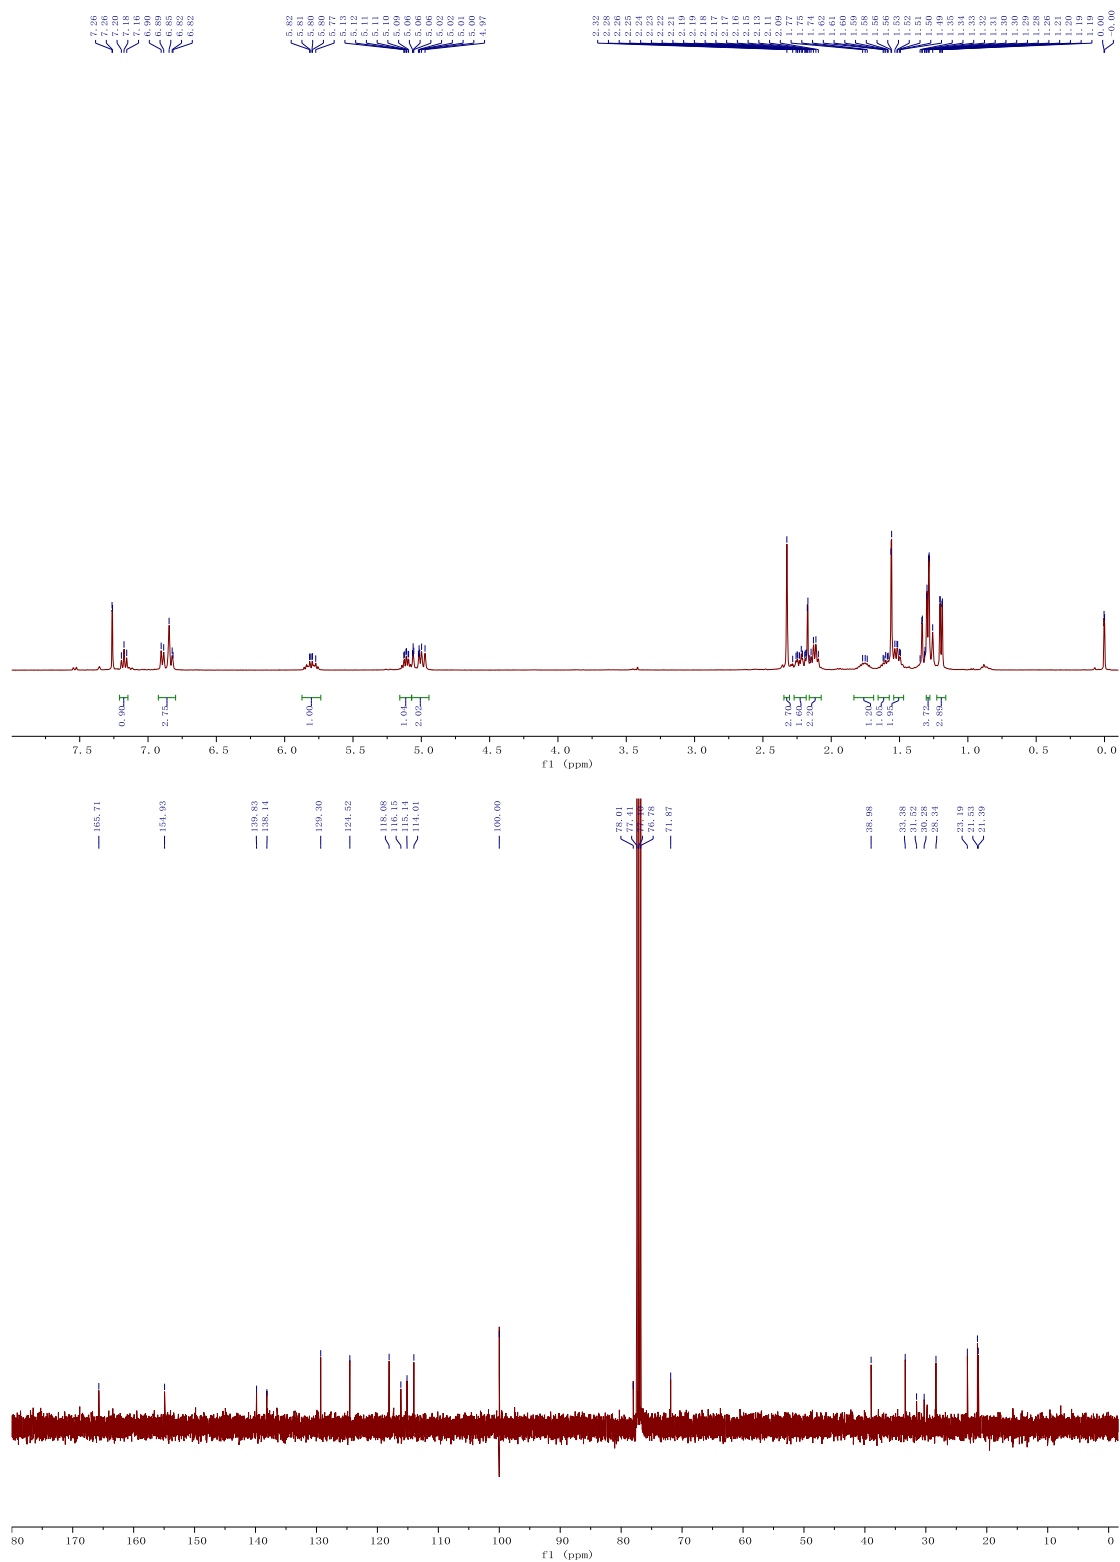



# isopropyl (R)-2-cyano-2-(p-tolyloxy)butanoate (6k)

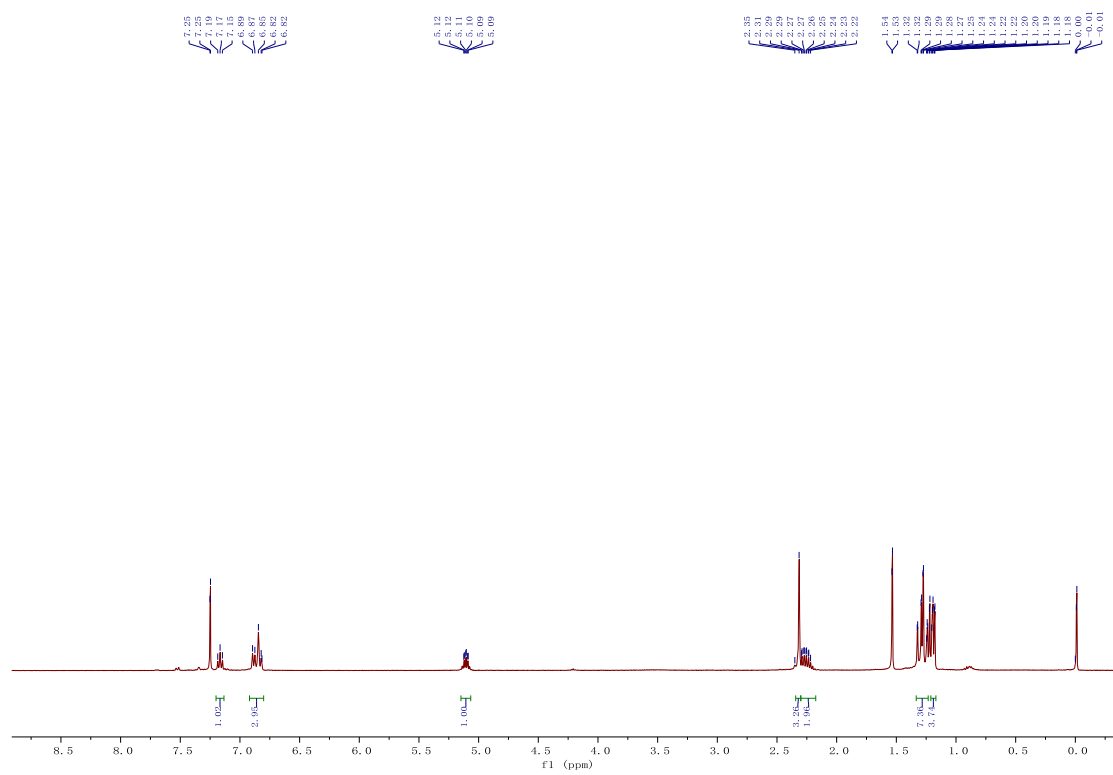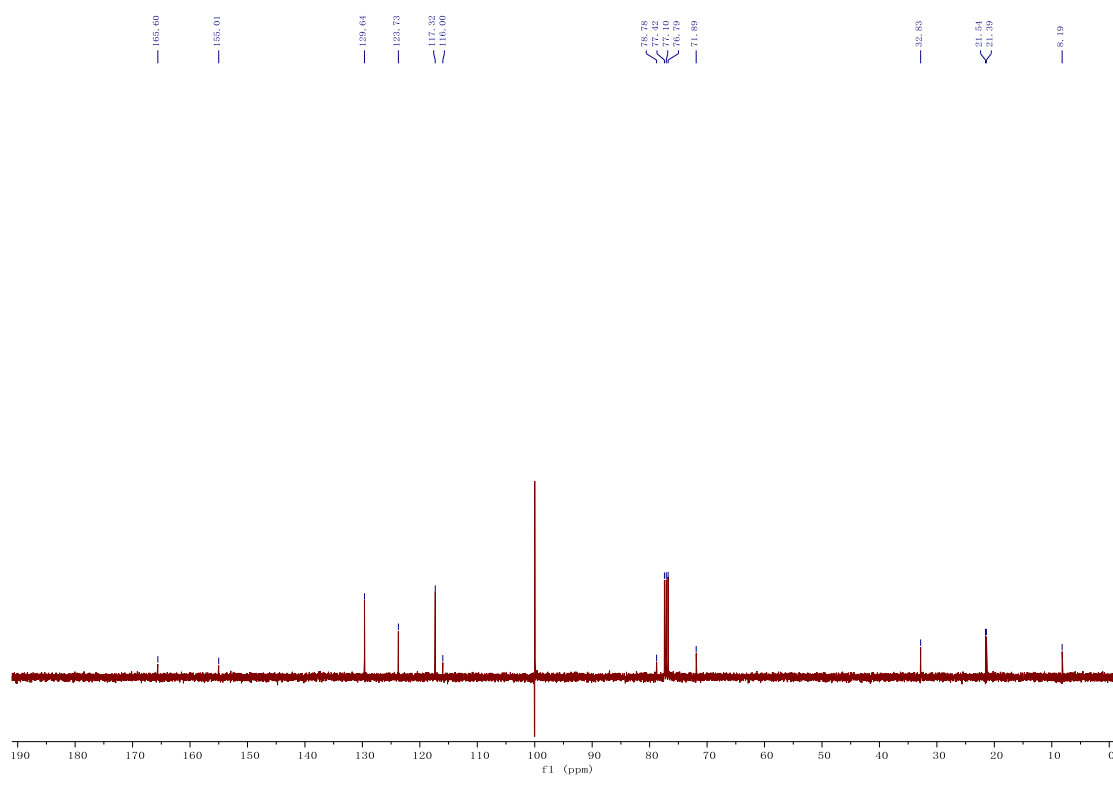

**(R)-N-benzyl-N-((2-cyano-1-hydroxypropan-2-yl)oxy)benzamide (7)**

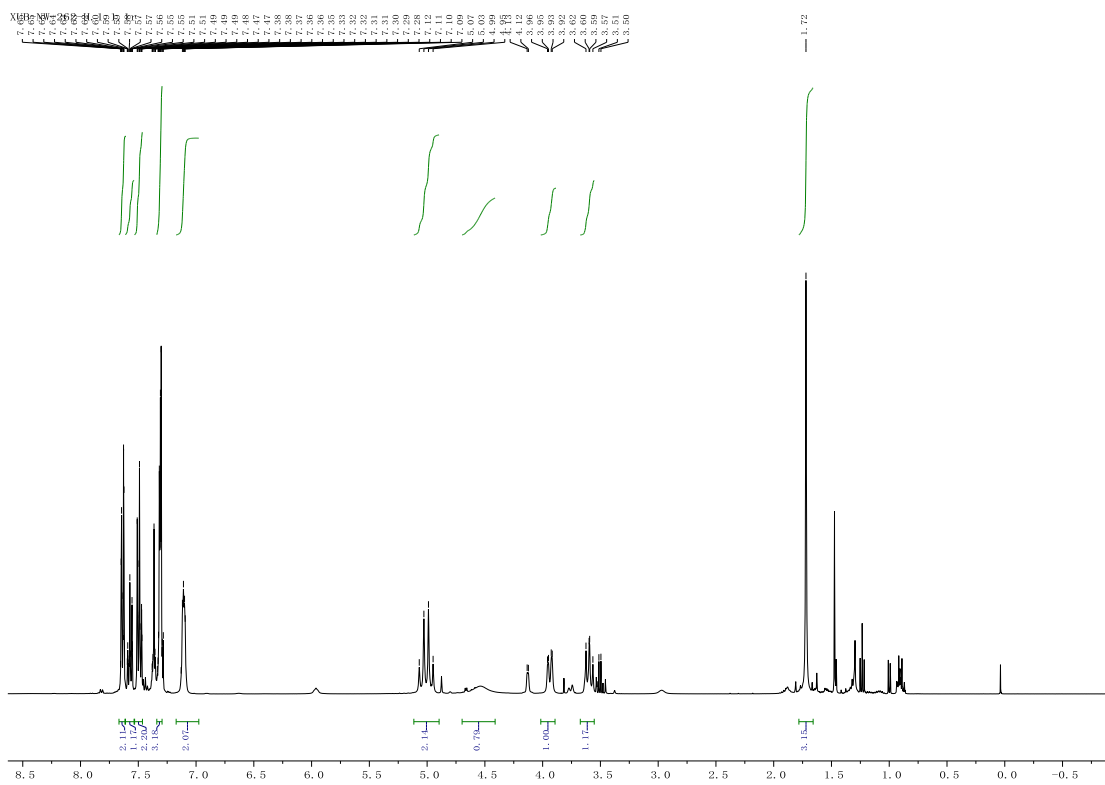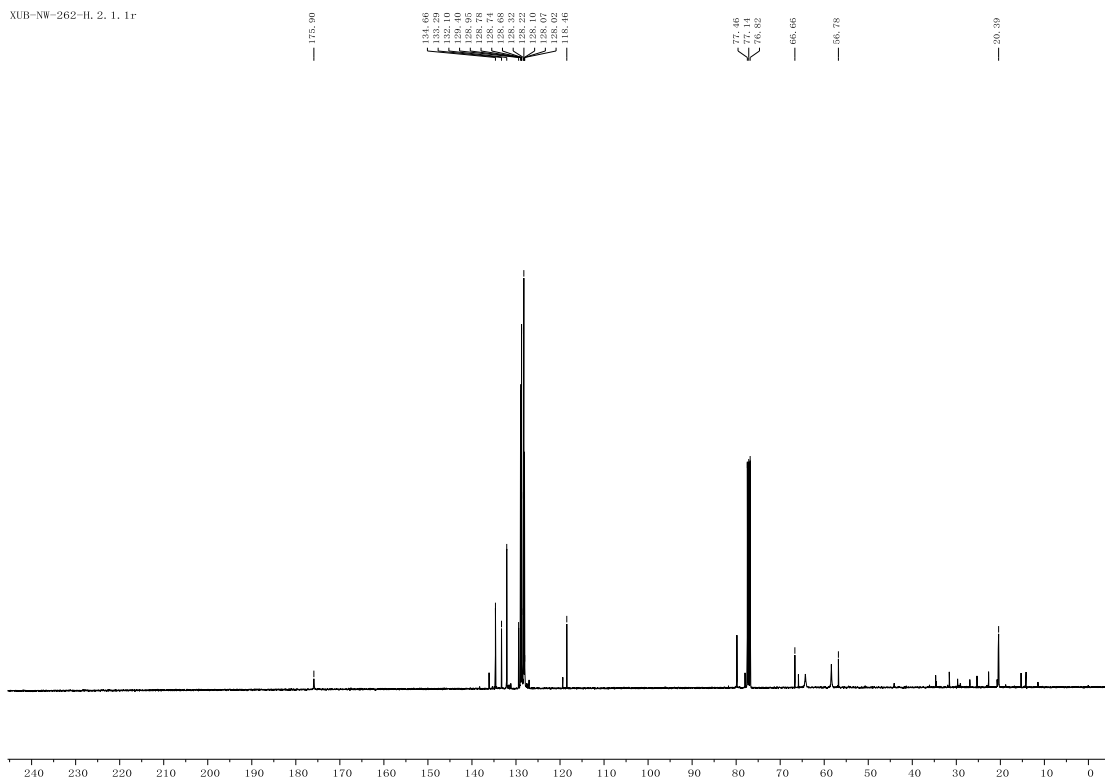

**(R)-2-((N-benzylbenzamido)oxy)-2-cyanopropyl 4-methylbenzenesulfonate (7-Ts)**

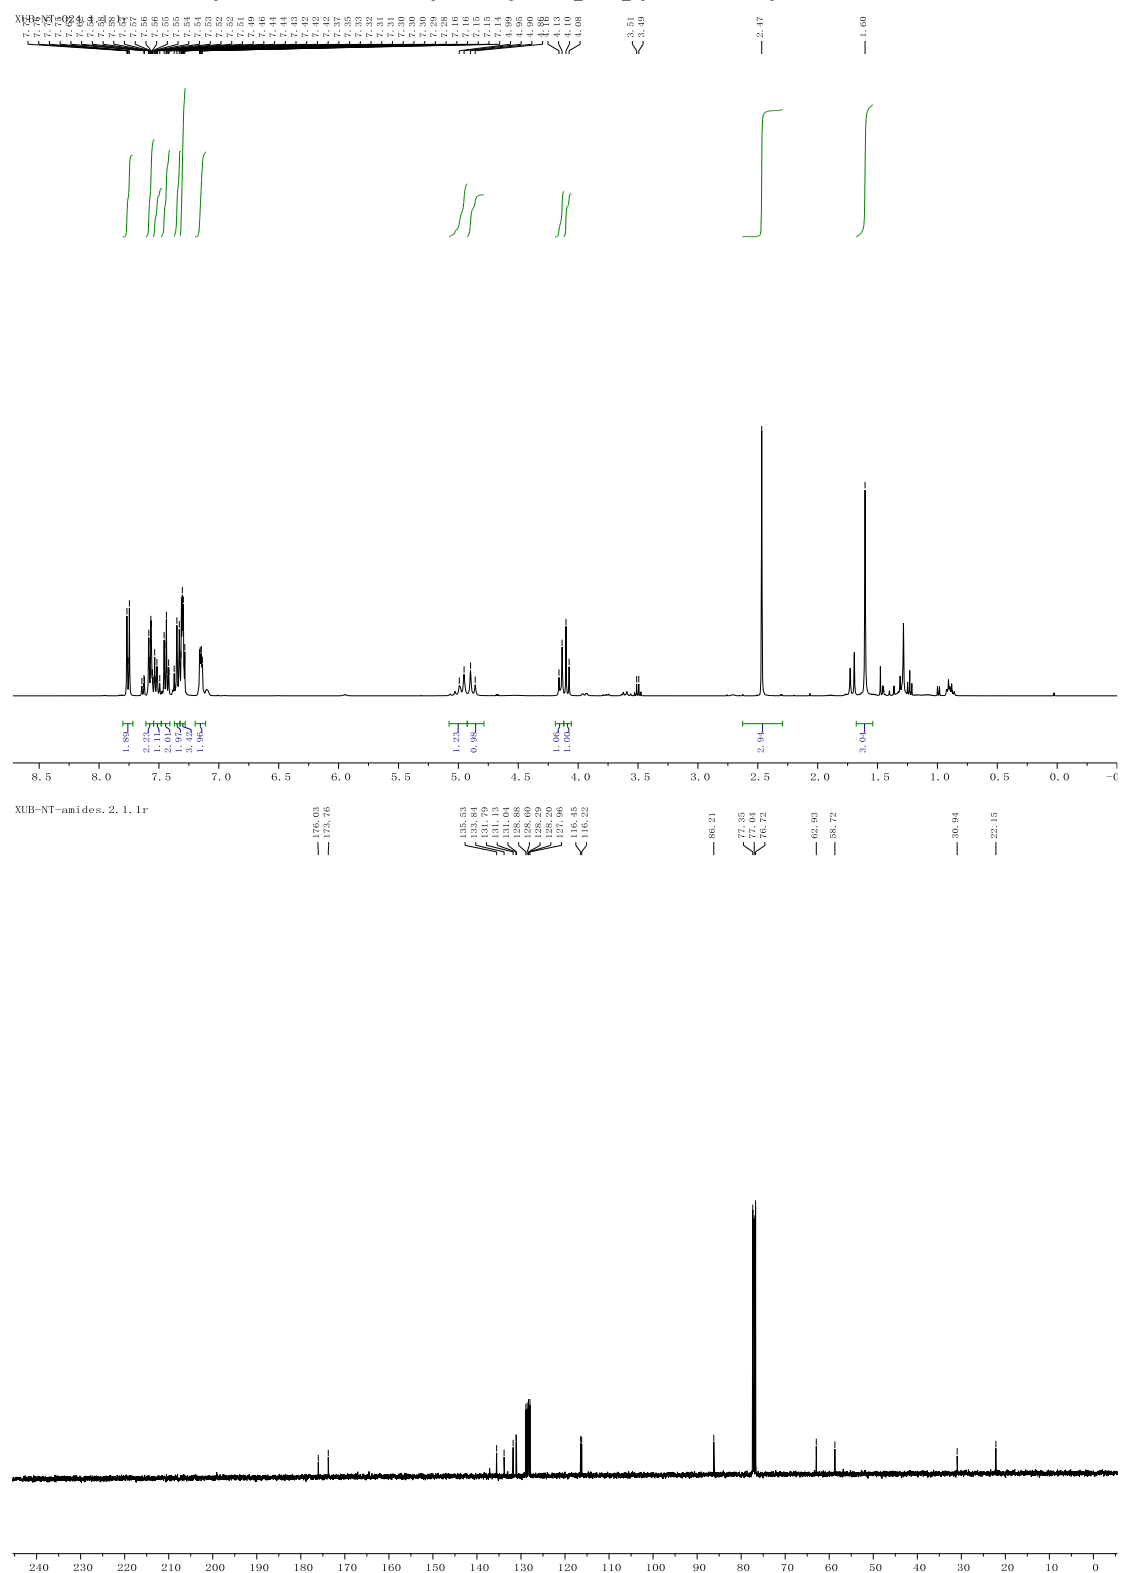

**(R)-N-benzyl-N-((2-cyano-1-((4-fluorophenyl)thio)propan-2-yl)oxy)benzamide**

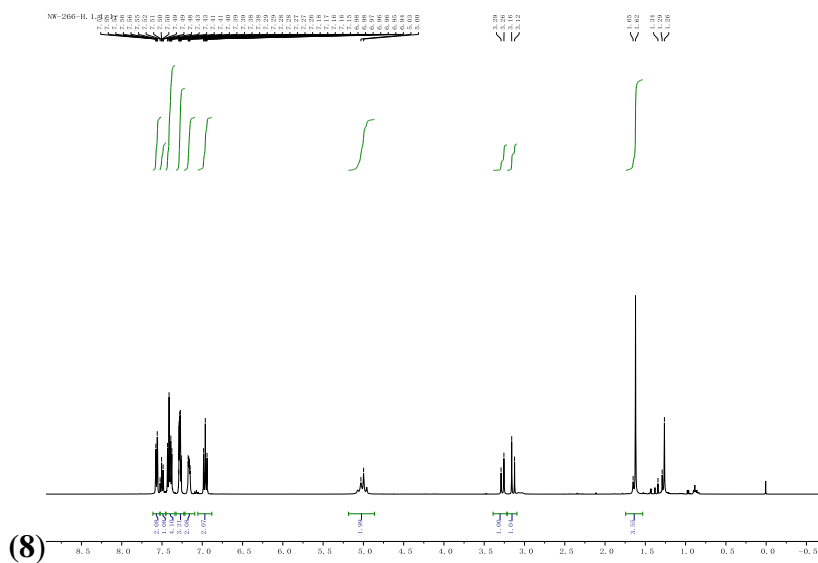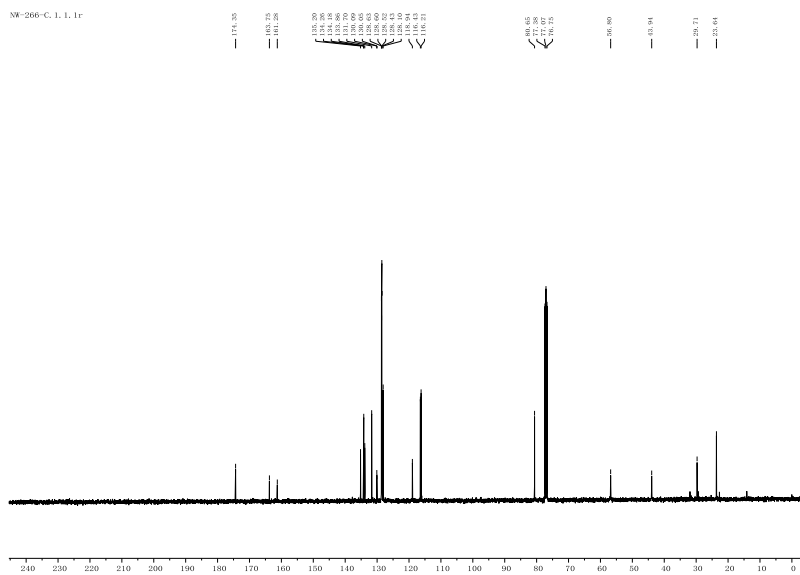

**(R)-N-((1-amino-3-((4-fluorophenyl)sulfonyl)-2-methyl-1-oxopropan-2-yl)oxy)-N-benzylbenzamide (8-amide)**

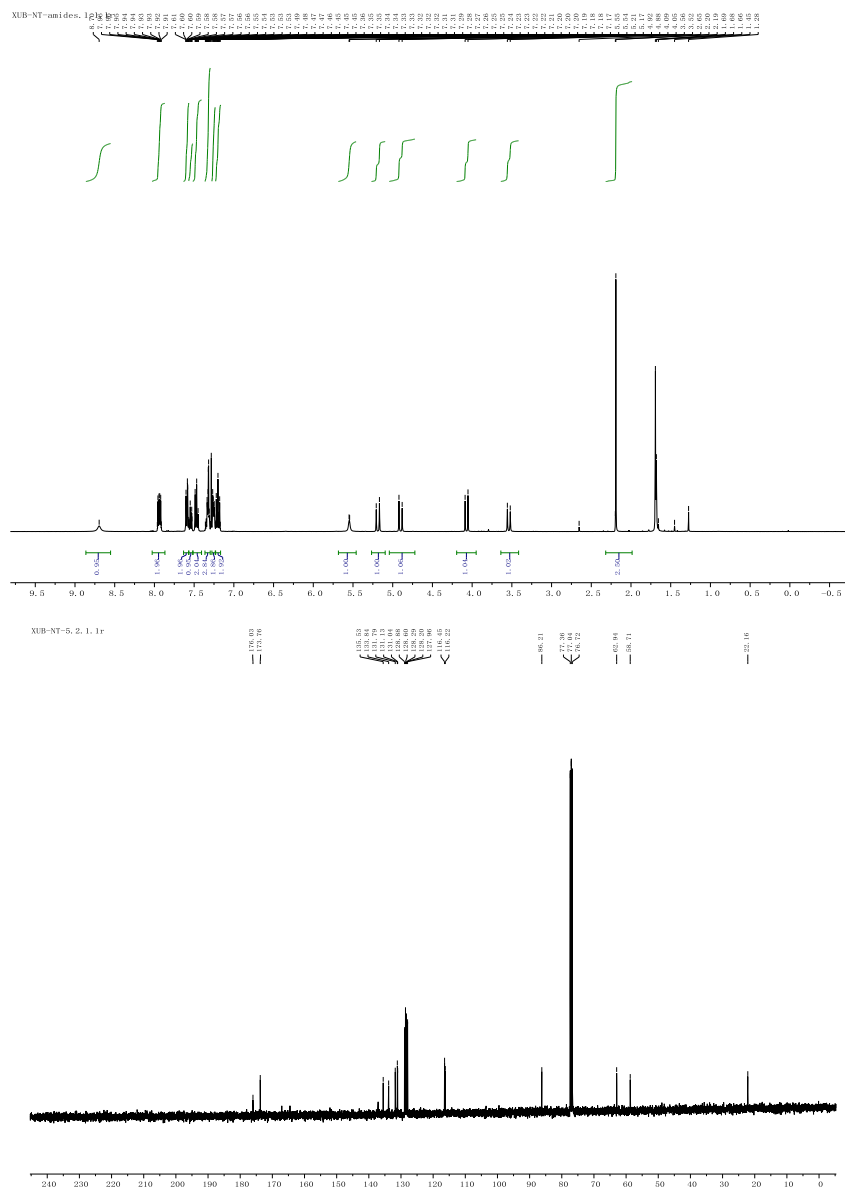

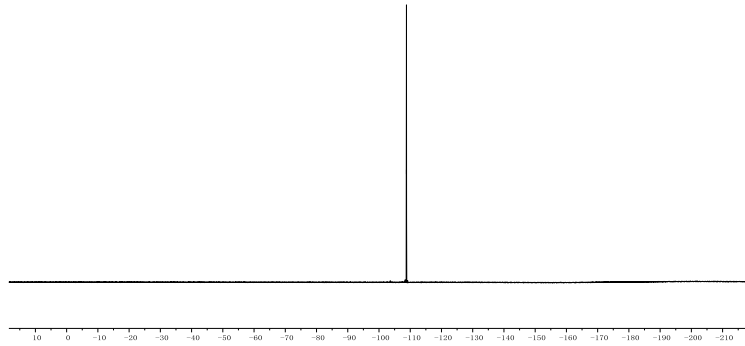

**(R)-N-(4-cyano-3-(trifluoromethyl)phenyl)-3-((4-fluorophenyl)sulfonyl)-2-hydroxy-2-methylpropanamide ((R)-Bicalutamide)**

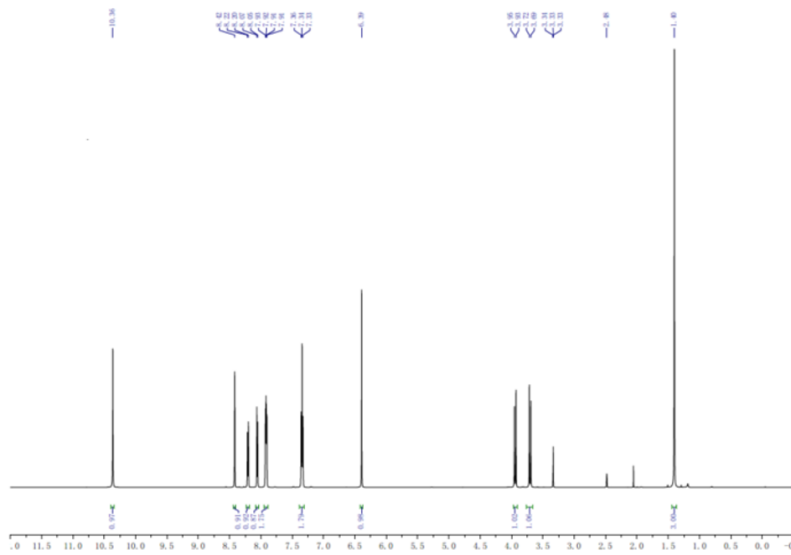



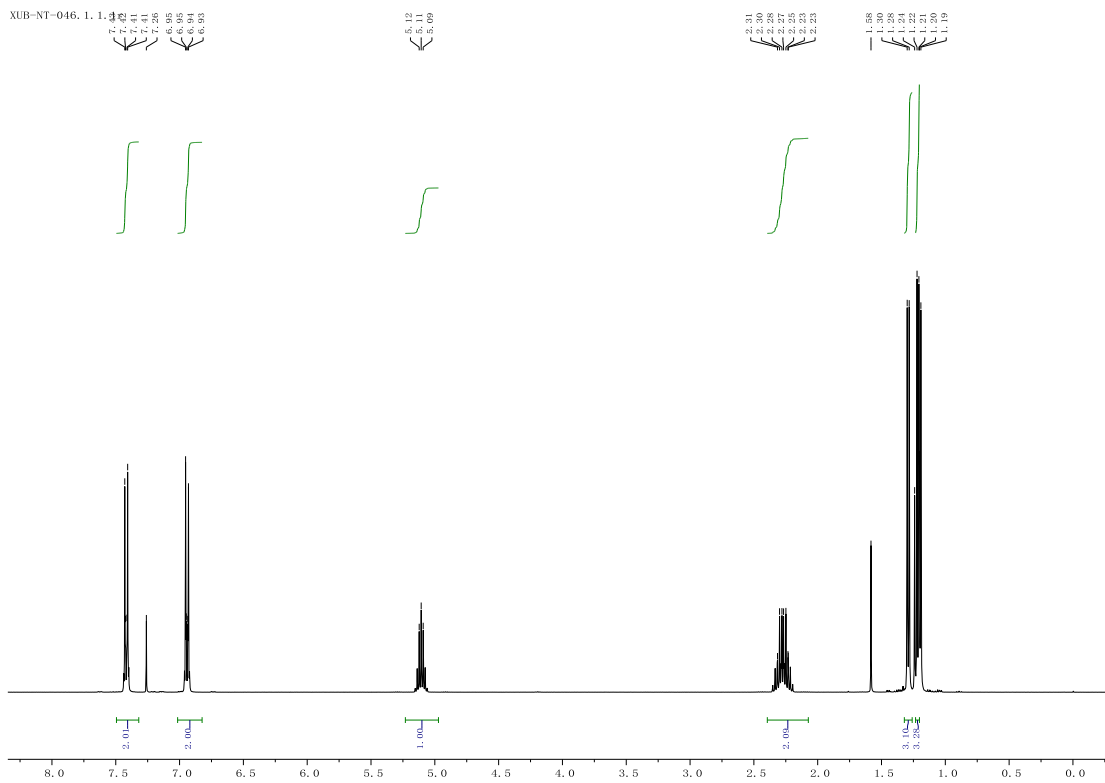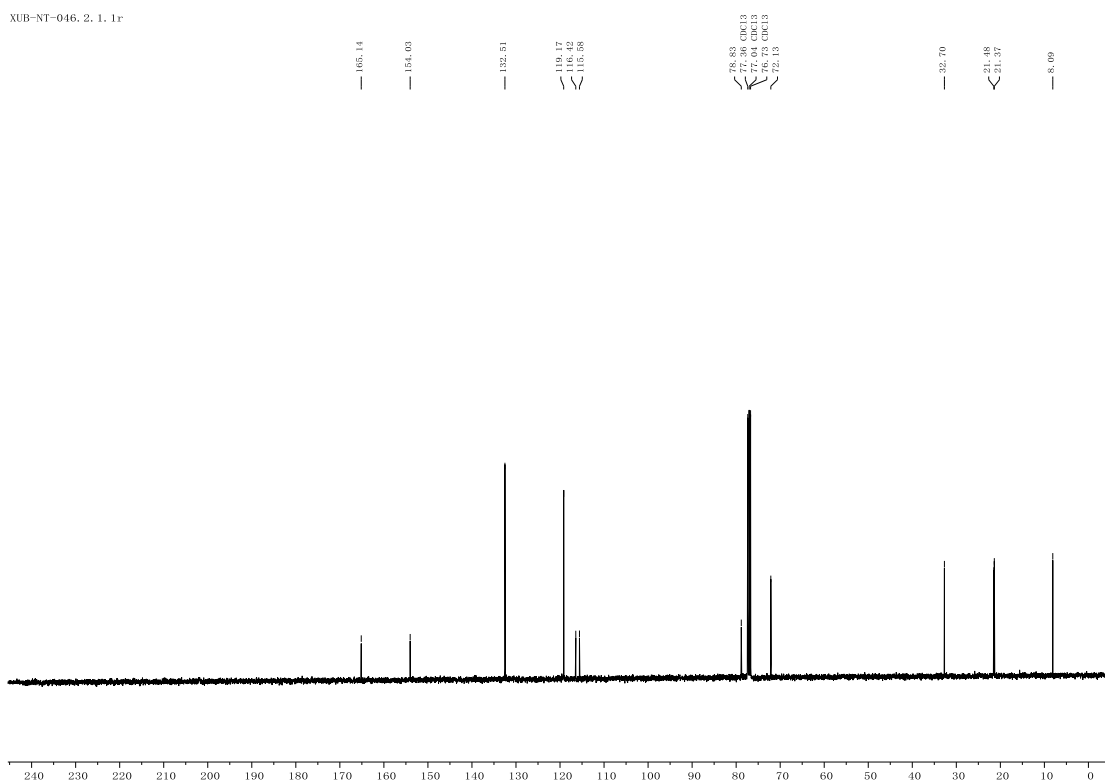

**(R)-2-(4-bromophenoxy)-2-(hydroxymethyl)butanenitrile (11)**



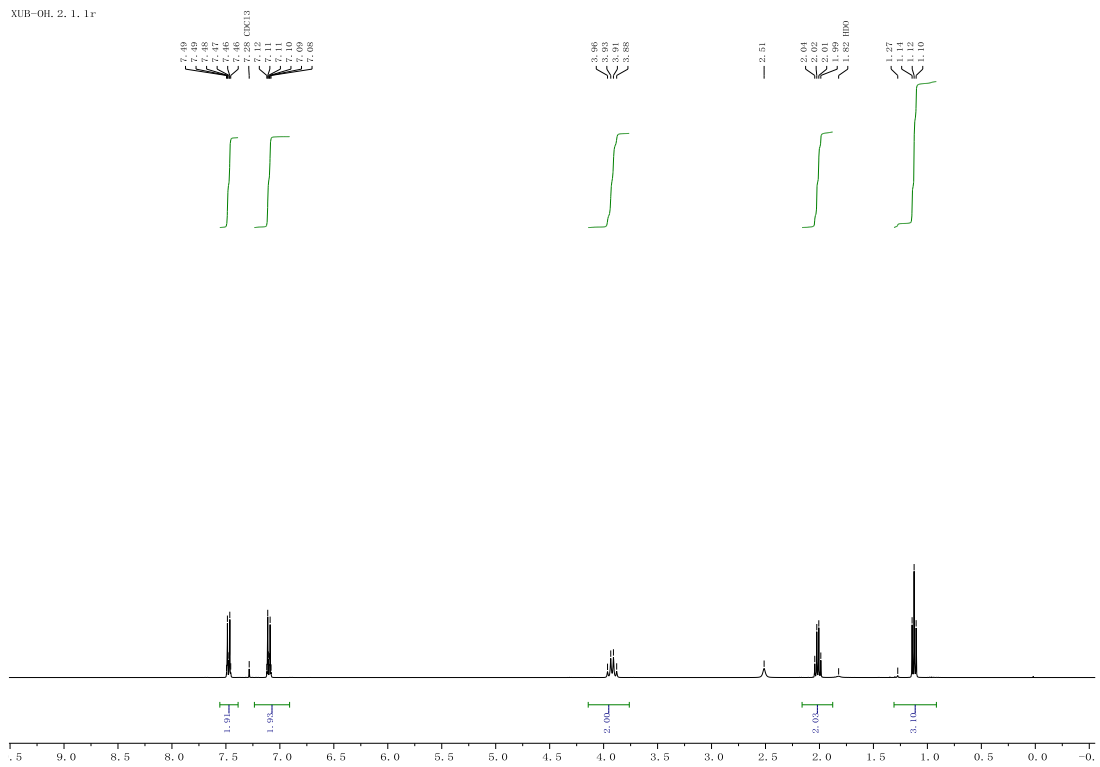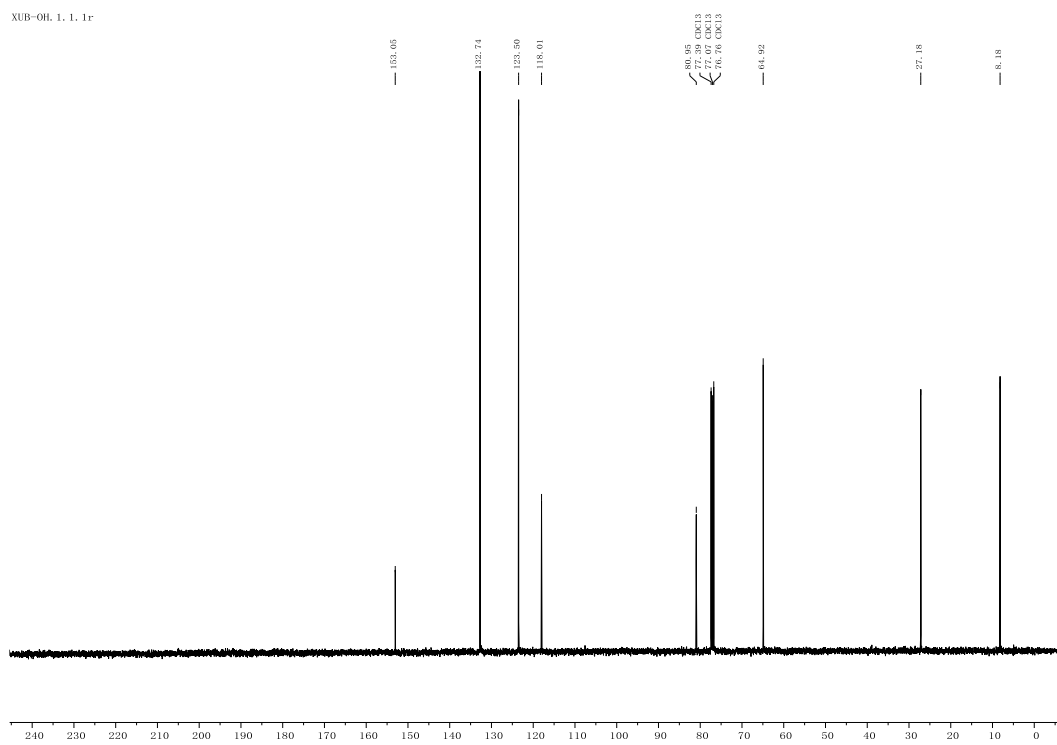

**(R)-2-(4-bromophenoxy)-2-cyanobutyl methanesulfonate (11-Ms)**

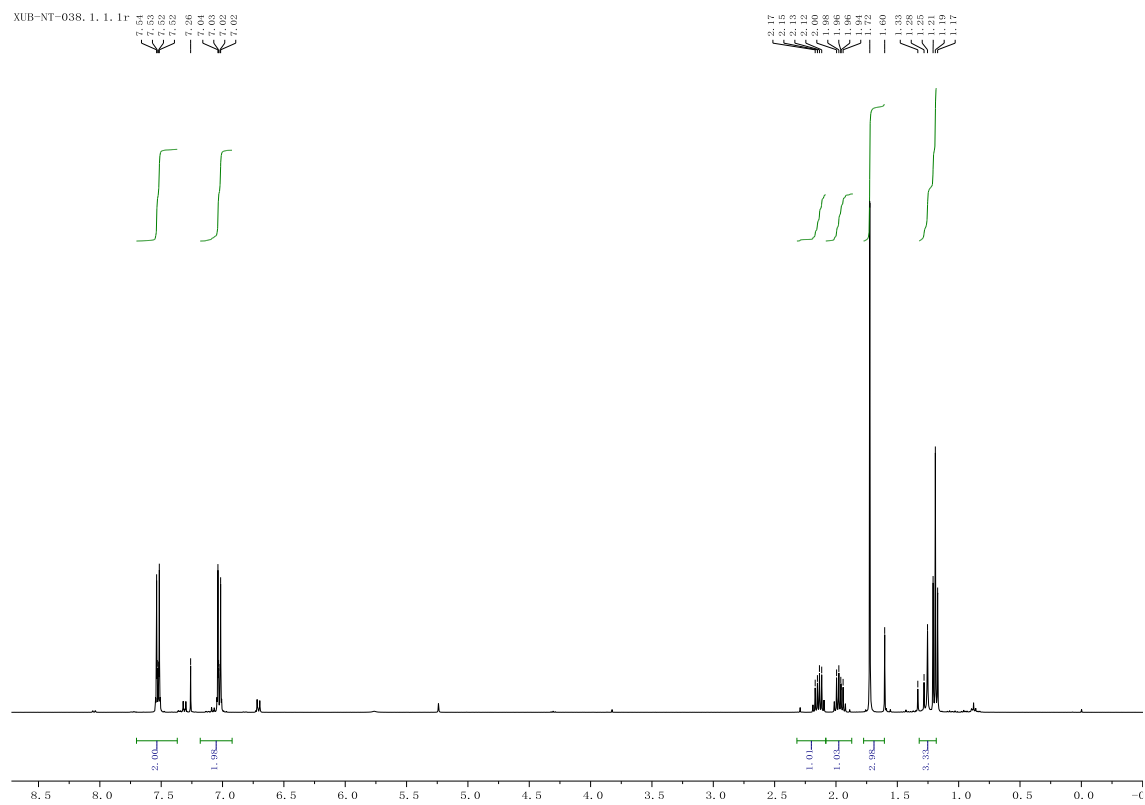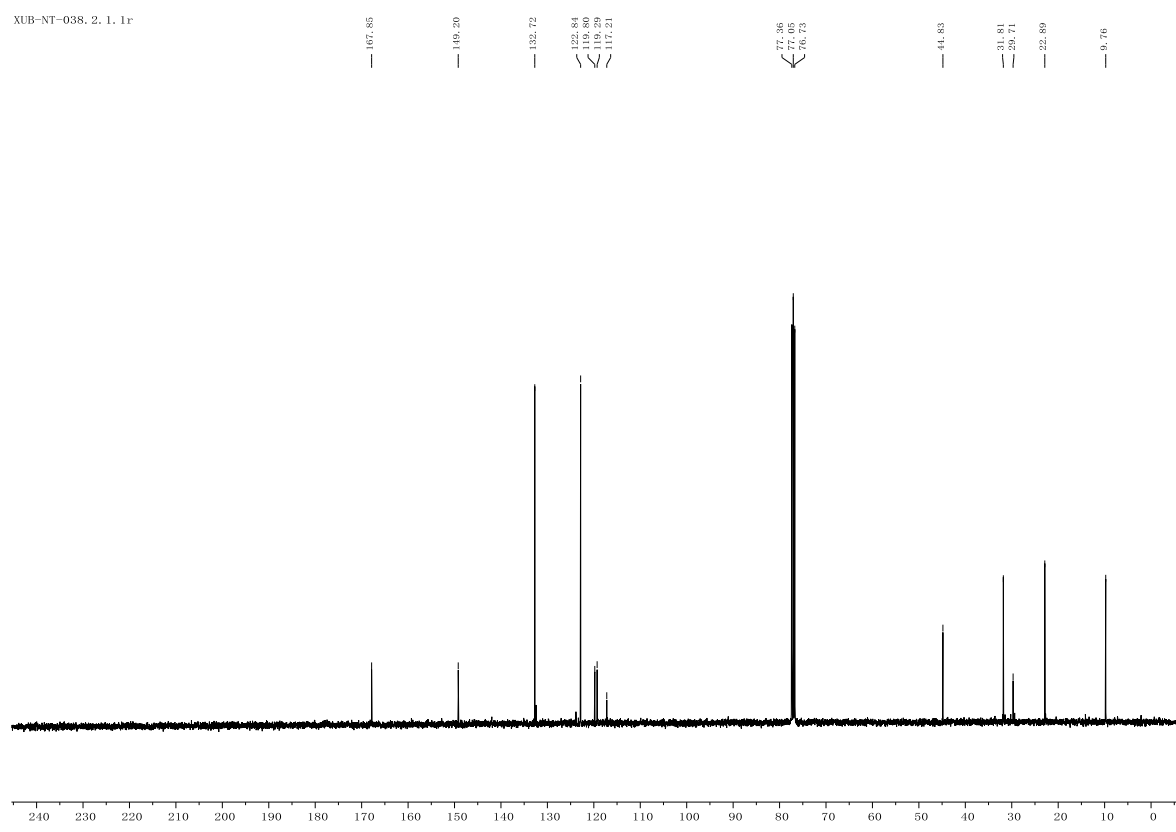

**(R)-2-(4-bromophenoxy)-2-methylbutanenitrile (12)**

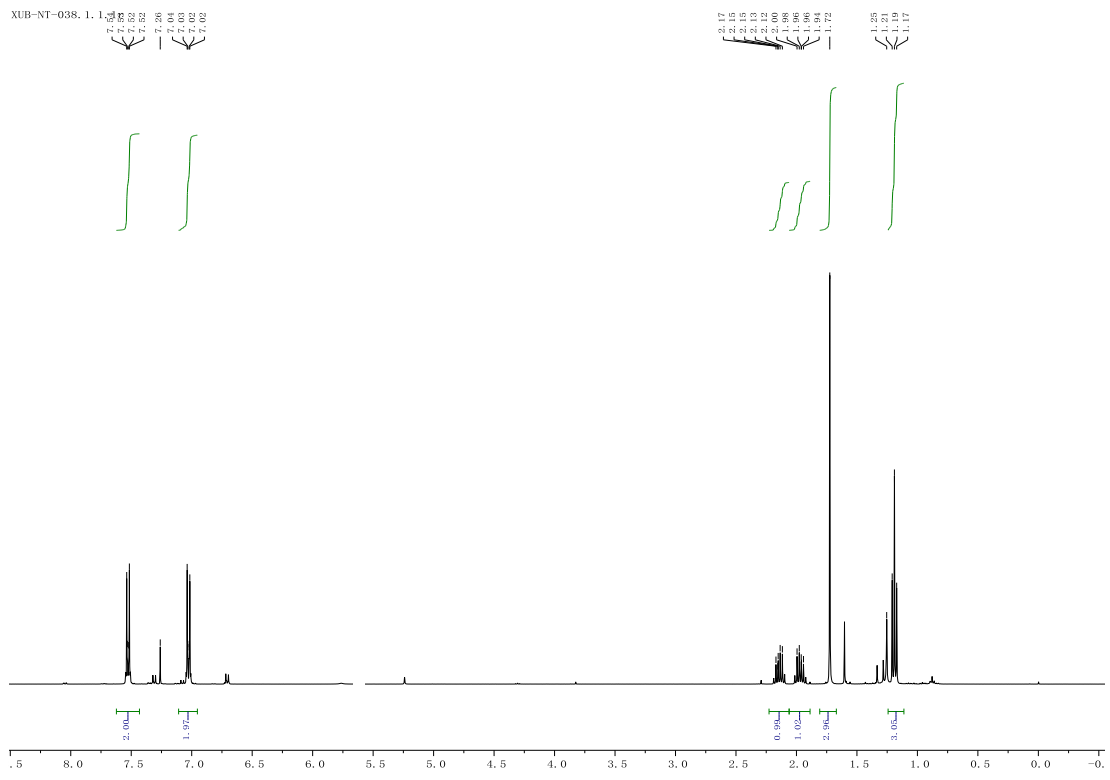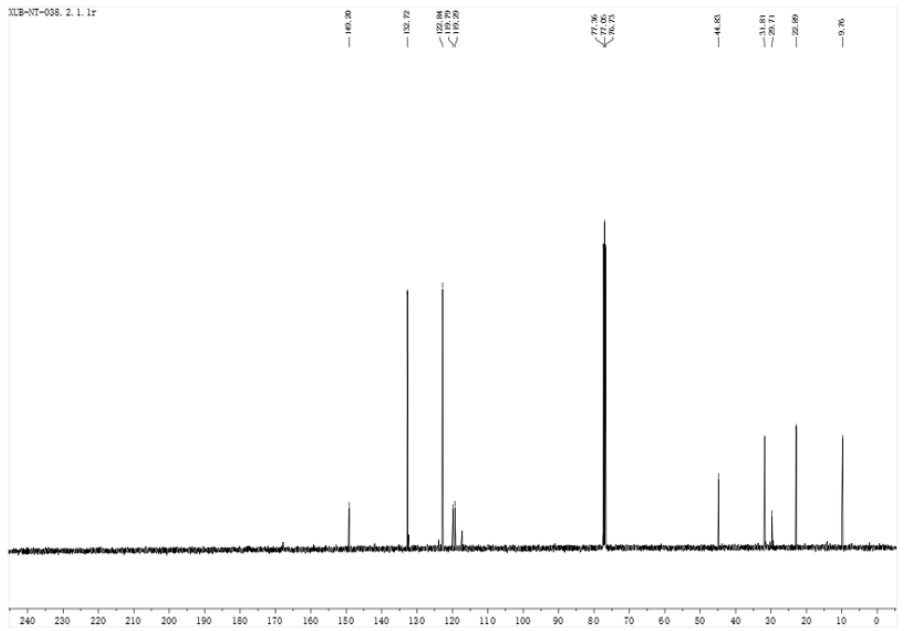

# (R)-2-(4-bromophenoxy)-2-cyanobutyl methanesulfonate (13-Me)

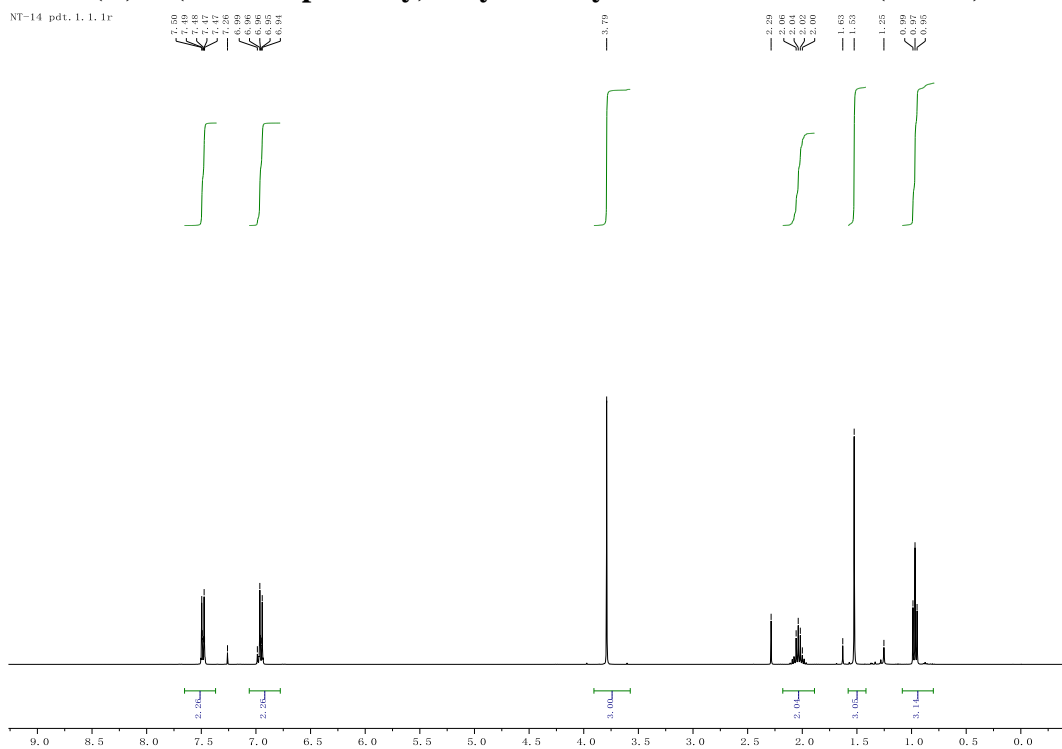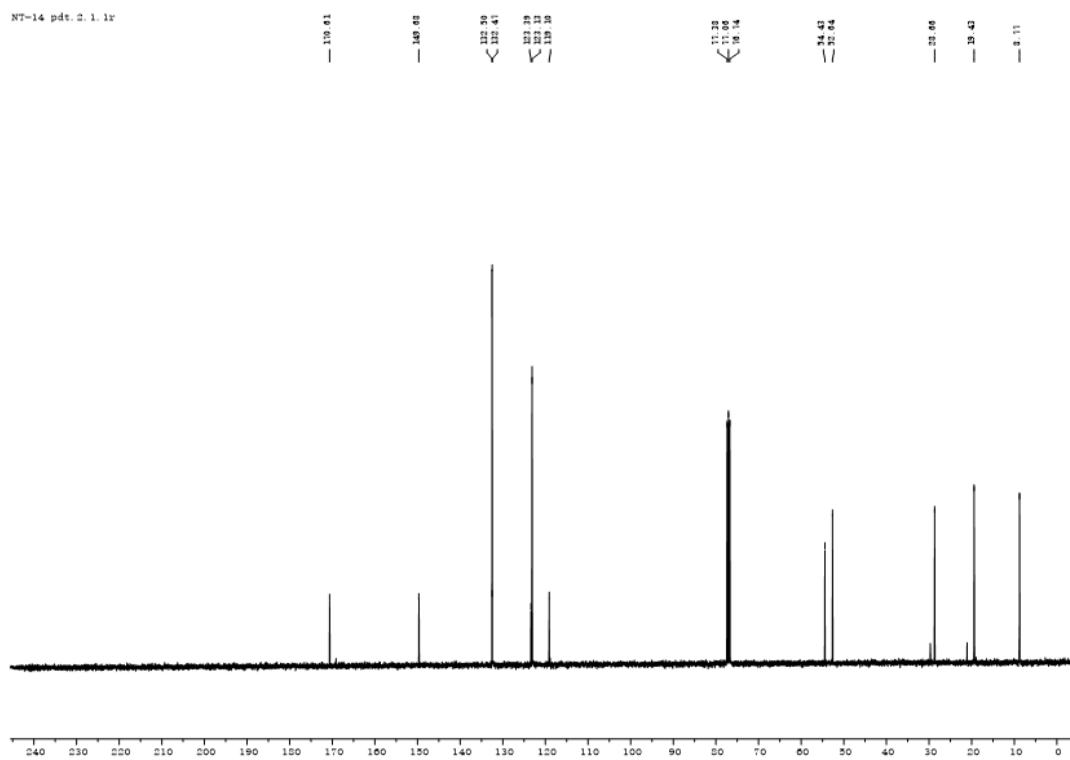

### 13. HPLC charts

#### isopropyl (R)-2-((N-benzylbenzamido)oxy)-2-cyano-3-phenylpropanoate (4g)

mV

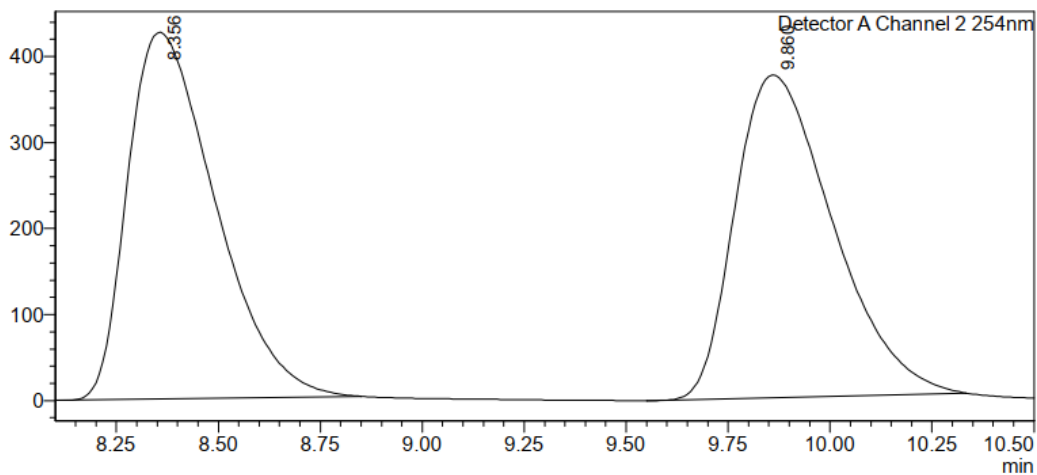

Detector A Channel 2 254nm

| Peak# | Ret. Time | Area     | Area%   |
|-------|-----------|----------|---------|
| 1     | 8.356     | 6376833  | 50.420  |
| 2     | 9.860     | 6270499  | 49.580  |
| Total |           | 12647332 | 100.000 |

mV

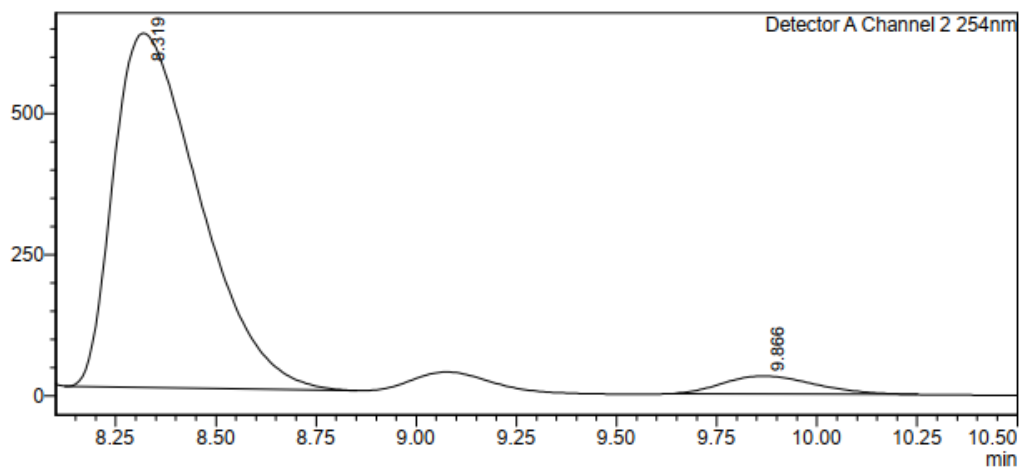

Detector A Channel 2 254nm

| Peak# | Ret. Time | Area    | Area%   |
|-------|-----------|---------|---------|
| 1     | 8.319     | 9392012 | 94.746  |
| 2     | 9.866     | 520871  | 5.254   |
| Total |           | 9912882 | 100.000 |

**isopropyl (R)-2-((N-benzylbenzamido)oxy)-2-cyano-3-(4-fluorophenyl)propanoate (4i)**

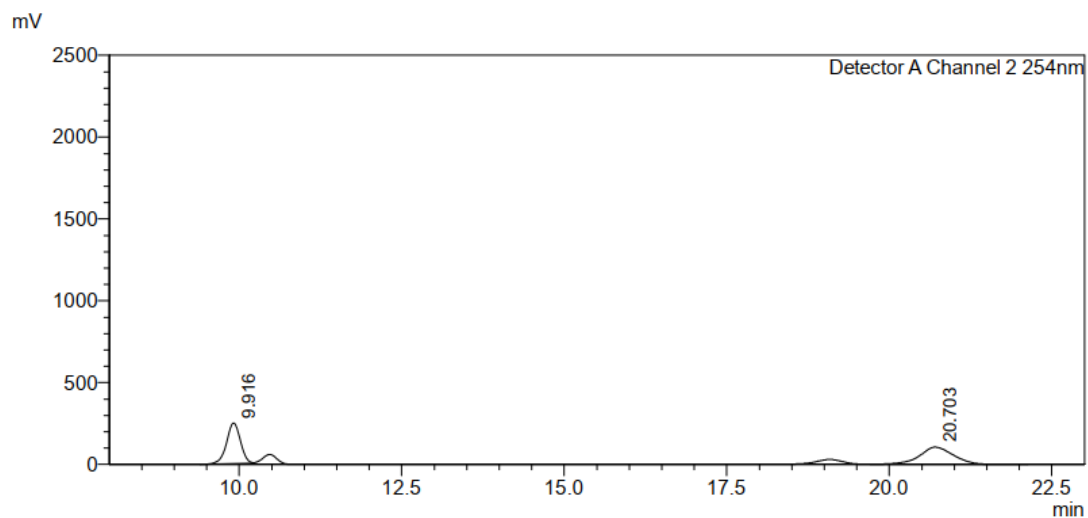

Detector A Channel 2 254nm

| Peak# | Ret. Time | Area    | Area%   |
|-------|-----------|---------|---------|
| 1     | 9.916     | 3760216 | 49.523  |
| 2     | 20.703    | 3832591 | 50.477  |
| Total |           | 7592808 | 100.000 |

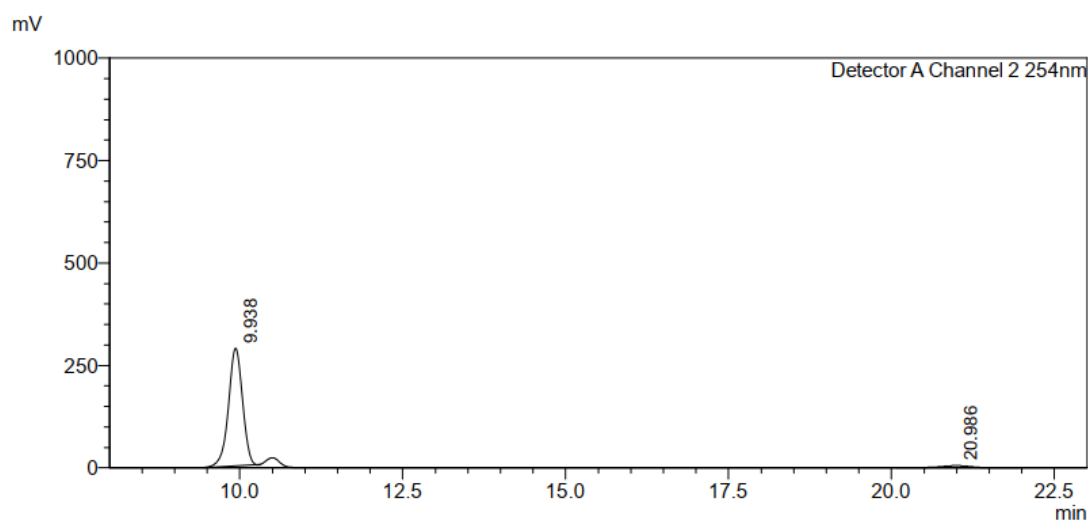

Detector A Channel 2 254nm

| Peak# | Ret. Time | Area    | Area%   |
|-------|-----------|---------|---------|
| 1     | 9.938     | 4309654 | 95.639  |
| 2     | 20.986    | 196534  | 4.361   |
| Total |           | 4506187 | 100.000 |

**isopropyl (R)-2-((N-benzylbenzamido)oxy)-3-(4-bromophenyl)-2-cyanopropanoate (4j)**

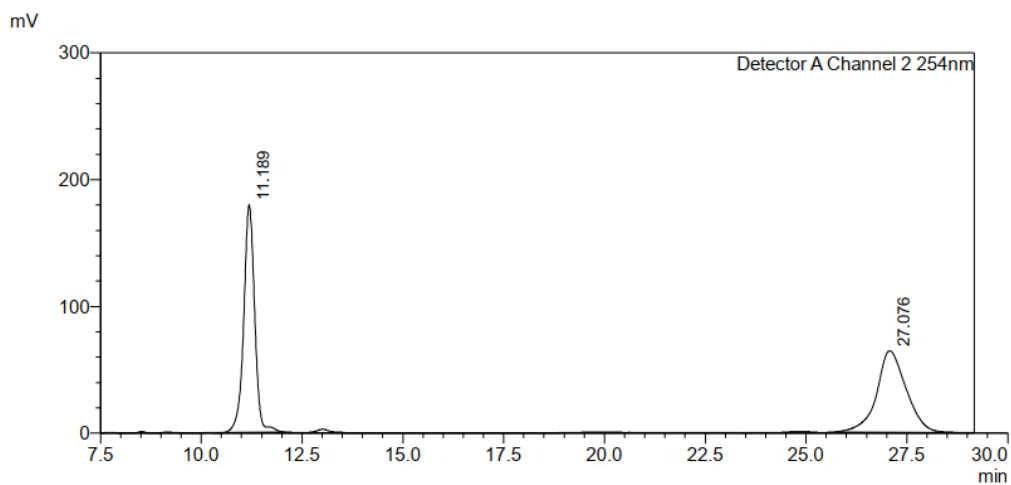

| Detector A Channel 2 254nm |           |         |         |
|----------------------------|-----------|---------|---------|
| Peak#                      | Ret. Time | Area    | Area%   |
| 1                          | 11.189    | 3373414 | 50.831  |
| 2                          | 27.076    | 3263141 | 49.169  |
| Total                      |           | 6636555 | 100.000 |

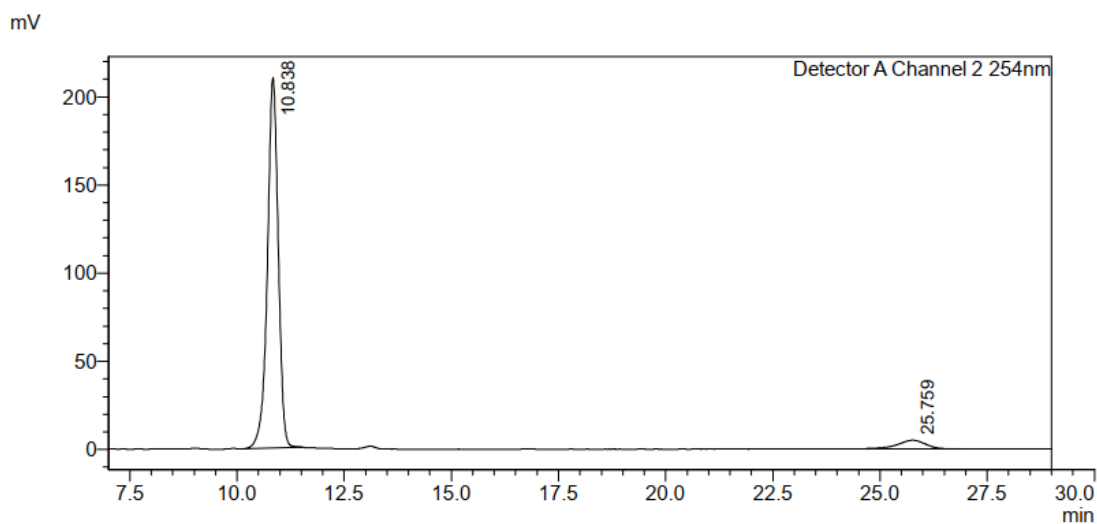

| Detector A Channel 2 254nm |           |         |         |
|----------------------------|-----------|---------|---------|
| Peak#                      | Ret. Time | Area    | Area%   |
| 1                          | 10.838    | 3699048 | 94.512  |
| 2                          | 25.759    | 214793  | 5.488   |
| Total                      |           | 3913841 | 100.000 |

**isopropyl (R)-2-((N-benzylbenzamido)oxy)-2-cyano-3-(2-iodophenyl)propanoate  
(4k)**

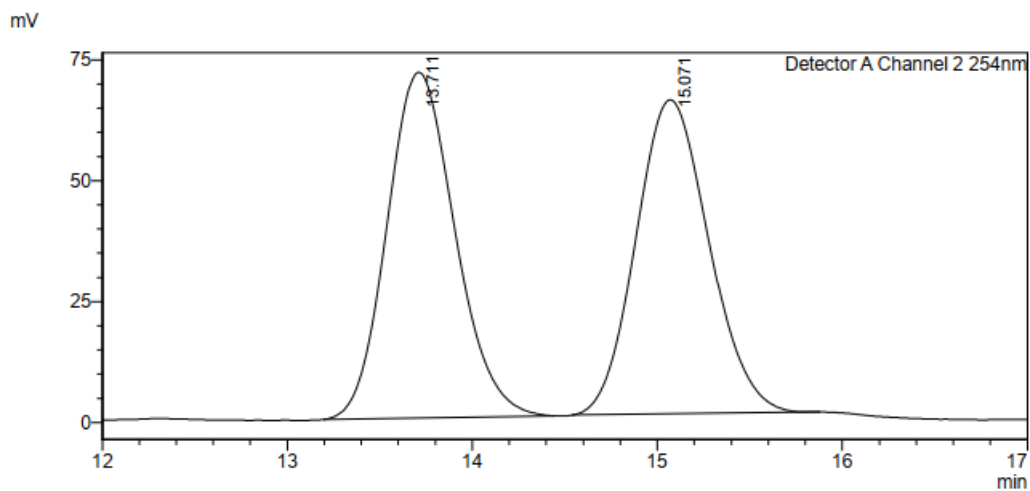

| Detector A Channel 2 254nm |           |         |         |
|----------------------------|-----------|---------|---------|
| Peak#                      | Ret. Time | Area    | Area%   |
| 1                          | 13.711    | 1819436 | 50.517  |
| 2                          | 15.071    | 1782197 | 49.483  |
| Total                      |           | 3601633 | 100.000 |

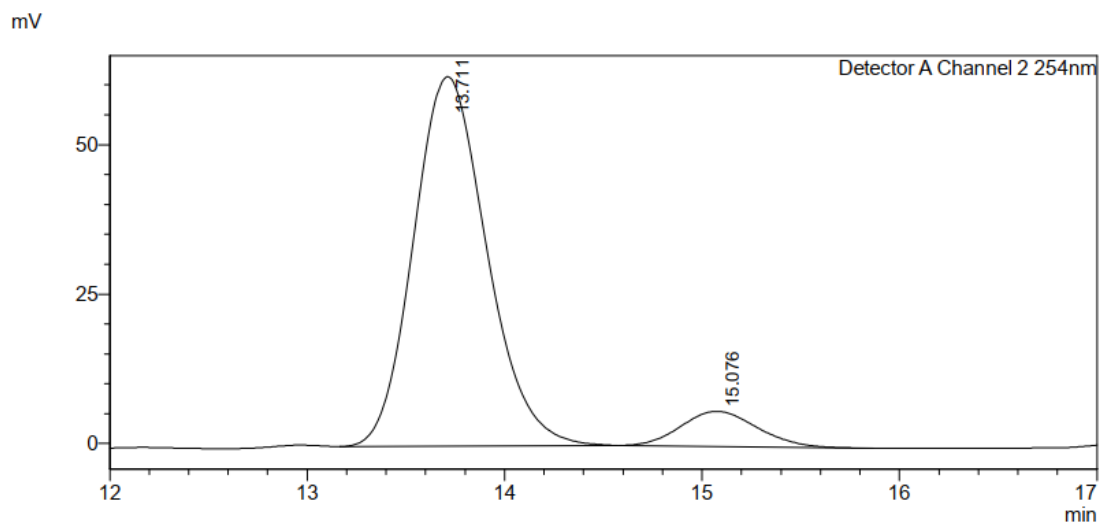

| Detector A Channel 2 254nm |           |         |         |
|----------------------------|-----------|---------|---------|
| Peak#                      | Ret. Time | Area    | Area%   |
| 1                          | 13.711    | 1589754 | 90.856  |
| 2                          | 15.076    | 159992  | 9.144   |
| Total                      |           | 1749747 | 100.000 |



**isopropyl (R)-2-((N-benzylbenzamido)oxy)-2-cyano-3-(4-nitrophenyl)propanoate  
(4I)**

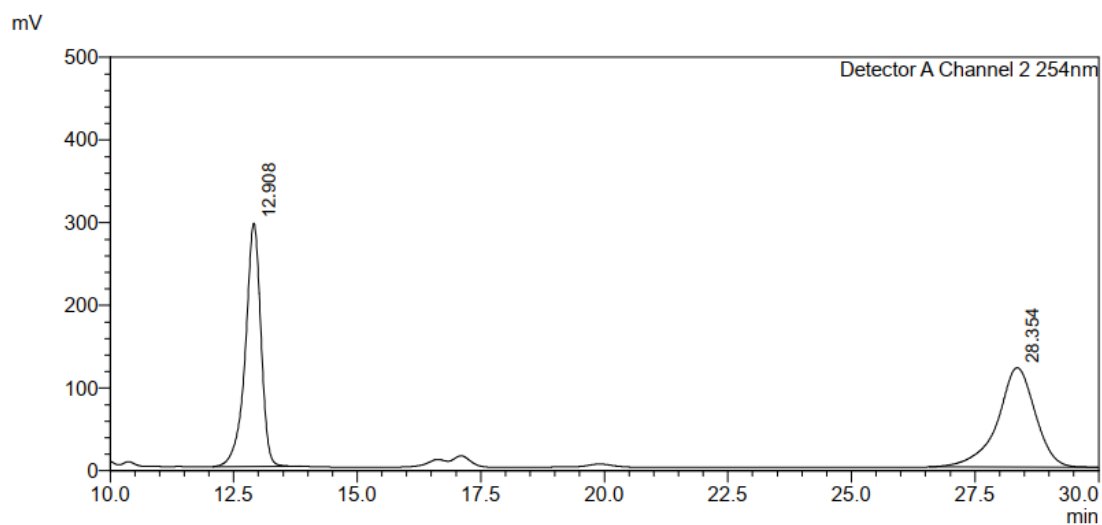

Detector A Channel 2 254nm

| Peak# | Ret. Time | Area     | Area%   |
|-------|-----------|----------|---------|
| 1     | 12.908    | 6461306  | 50.260  |
| 2     | 28.354    | 6394552  | 49.740  |
| Total |           | 12855858 | 100.000 |

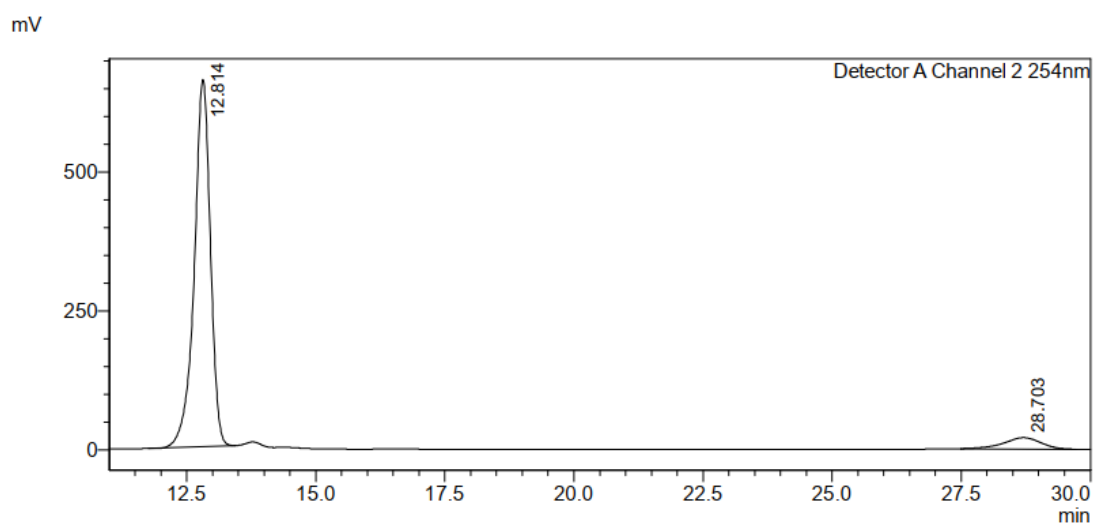

Detector A Channel 2 254nm

| Peak# | Ret. Time | Area     | Area%   |
|-------|-----------|----------|---------|
| 1     | 12.814    | 14370542 | 93.320  |
| 2     | 28.703    | 1028676  | 6.680   |
| Total |           | 15399219 | 100.000 |

isopropyl (R)-2-((N-benzylbenzamido)oxy)-2-cyano-3-(4-methoxyphenyl)propanoate  
(4m)

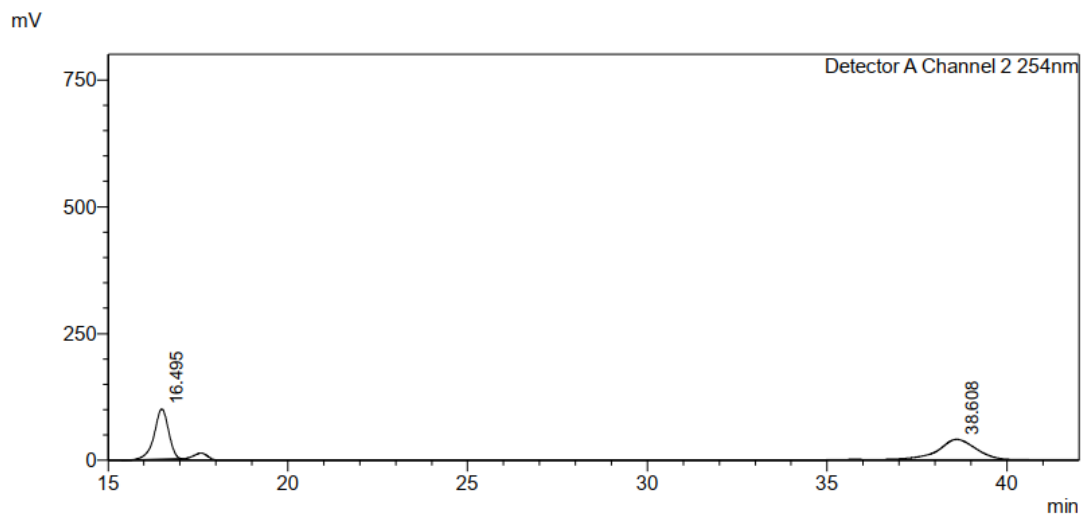

Detector A Channel 2 254nm

| Peak# | Ret. Time | Area    | Area%   |
|-------|-----------|---------|---------|
| 1     | 16.495    | 2781329 | 49.050  |
| 2     | 38.608    | 2889034 | 50.950  |
| Total |           | 5670363 | 100.000 |

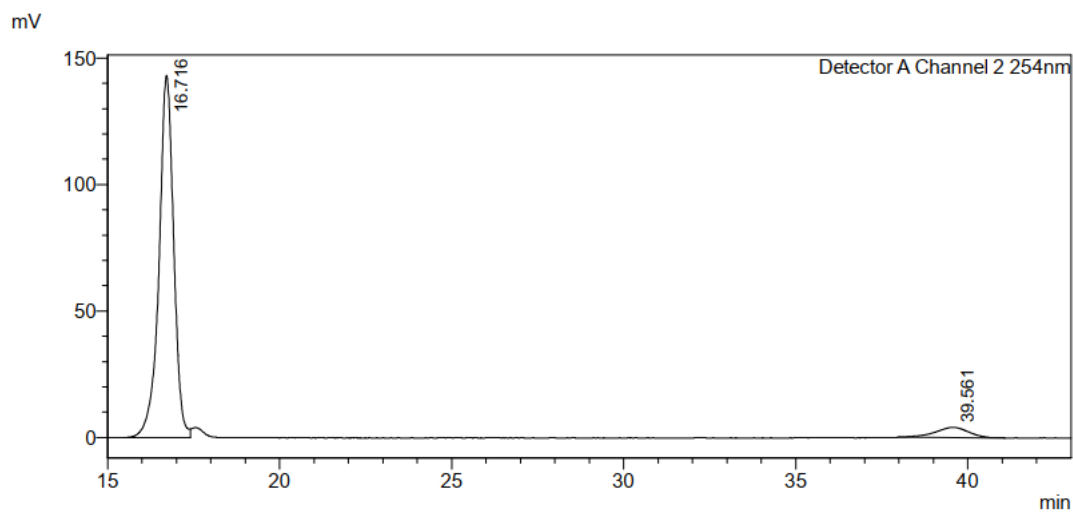

Detector A Channel 2 254nm

| Peak# | Ret. Time | Area    | Area%   |
|-------|-----------|---------|---------|
| 1     | 16.716    | 4253771 | 93.961  |
| 2     | 39.561    | 273372  | 6.039   |
| Total |           | 4527143 | 100.000 |

isopropyl (R)-2-((N-benzylbenzamido)oxy)-2-cyano-3-(o-tolyl)propanoate (4n)

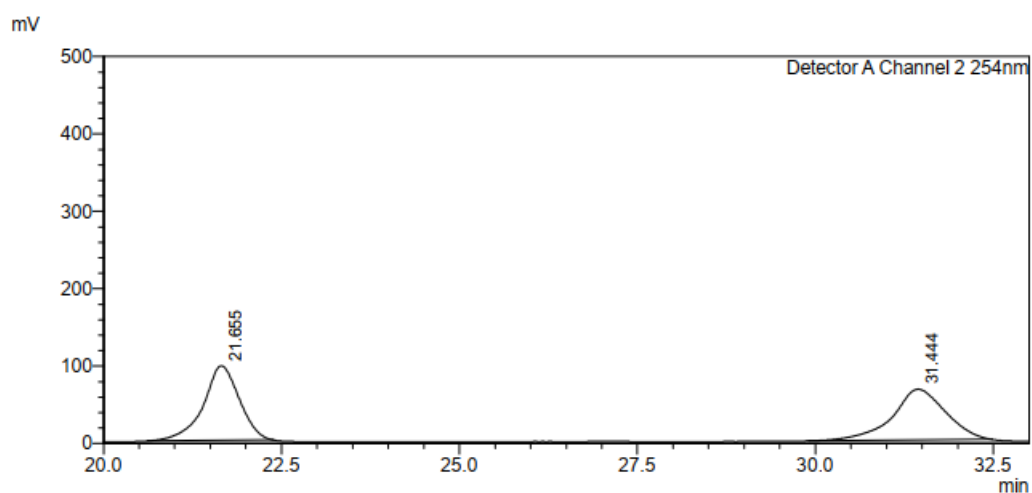

Detector A Channel 2 254nm

| Peak# | Ret. Time | Area    | Area%   |
|-------|-----------|---------|---------|
| 1     | 21.655    | 3410157 | 49.887  |
| 2     | 31.444    | 3425593 | 50.113  |
| Total |           | 6835750 | 100.000 |

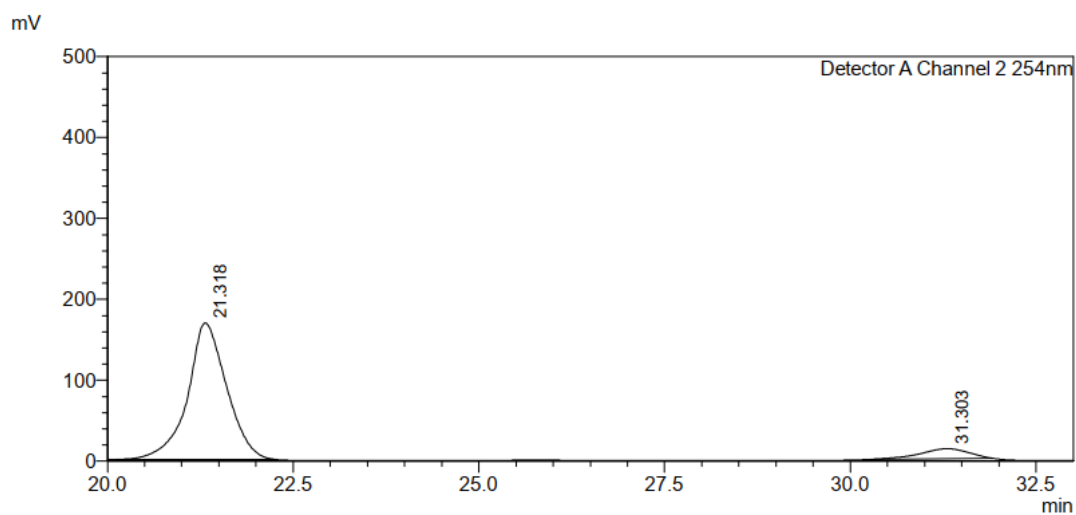

Detector A Channel 2 254nm

| Peak# | Ret. Time | Area    | Area%   |
|-------|-----------|---------|---------|
| 1     | 21.318    | 6172005 | 91.791  |
| 2     | 31.303    | 551949  | 8.209   |
| Total |           | 6723953 | 100.000 |

**isopropyl (R)-2-((N-benzylbenzamido)oxy)-2-cyano-3-(thiophen-2-yl)propanoate  
(4o)**

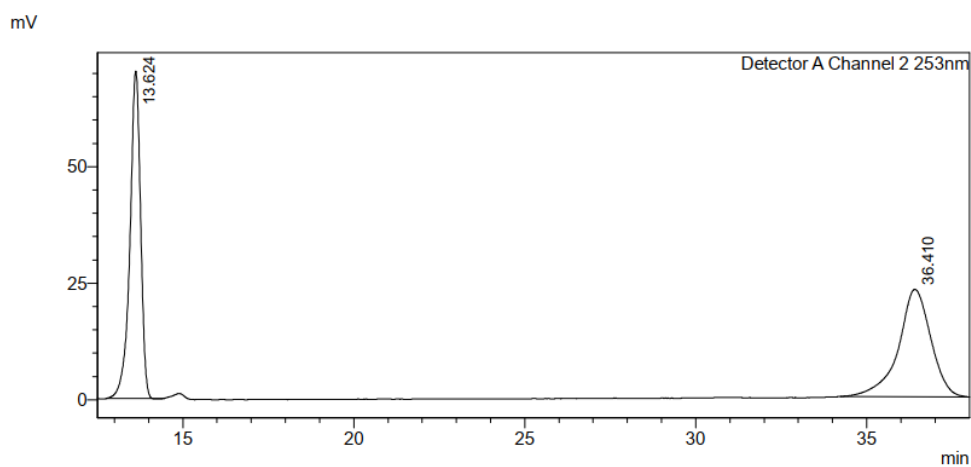

| Detector A Channel 2 253nm |           |         |         |
|----------------------------|-----------|---------|---------|
| Peak#                      | Ret. Time | Area    | Area%   |
| 1                          | 13.624    | 1516810 | 49.950  |
| 2                          | 36.410    | 1519844 | 50.050  |
| Total                      |           | 3036654 | 100.000 |

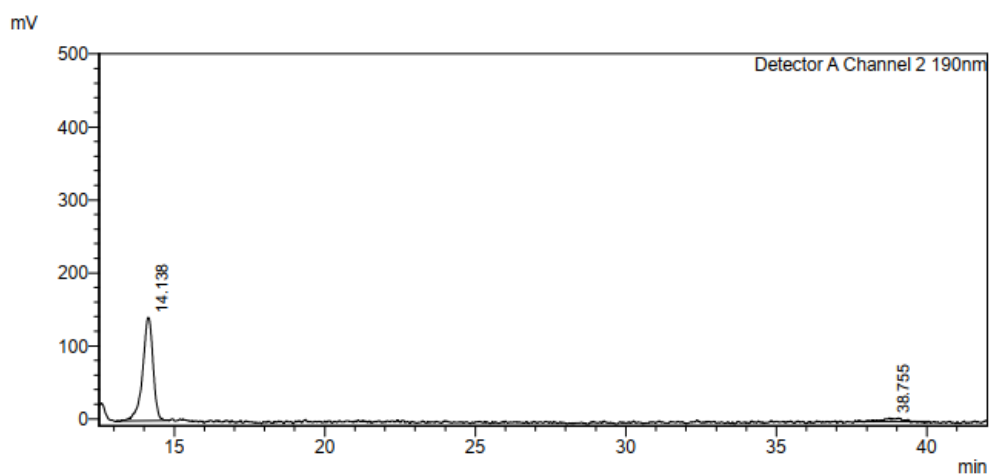

| Detector A Channel 2 190nm |           |         |         |
|----------------------------|-----------|---------|---------|
| Peak#                      | Ret. Time | Area    | Area%   |
| 1                          | 14.138    | 3407936 | 94.777  |
| 2                          | 38.755    | 187810  | 5.223   |
| Total                      |           | 3595746 | 100.000 |

isopropyl (R)-2-((N-benzylbenzamido)oxy)-2-cyano-3-(naphthalen-2-yl)propanoate  
(4p)

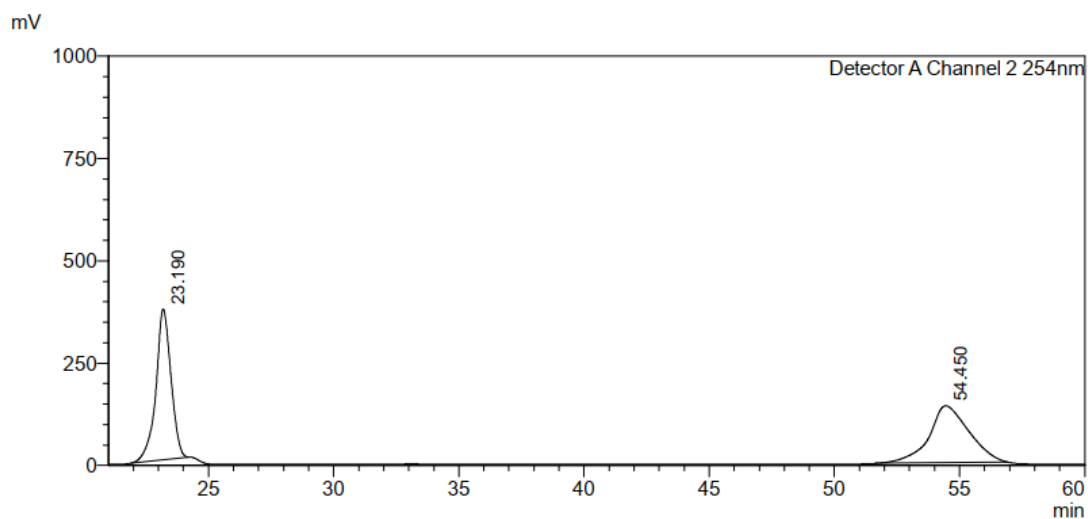

| Peak# | Ret. Time | Area     | Area%   |
|-------|-----------|----------|---------|
| 1     | 23.190    | 15424686 | 49.938  |
| 2     | 54.450    | 15463045 | 50.062  |
| Total |           | 30887731 | 100.000 |

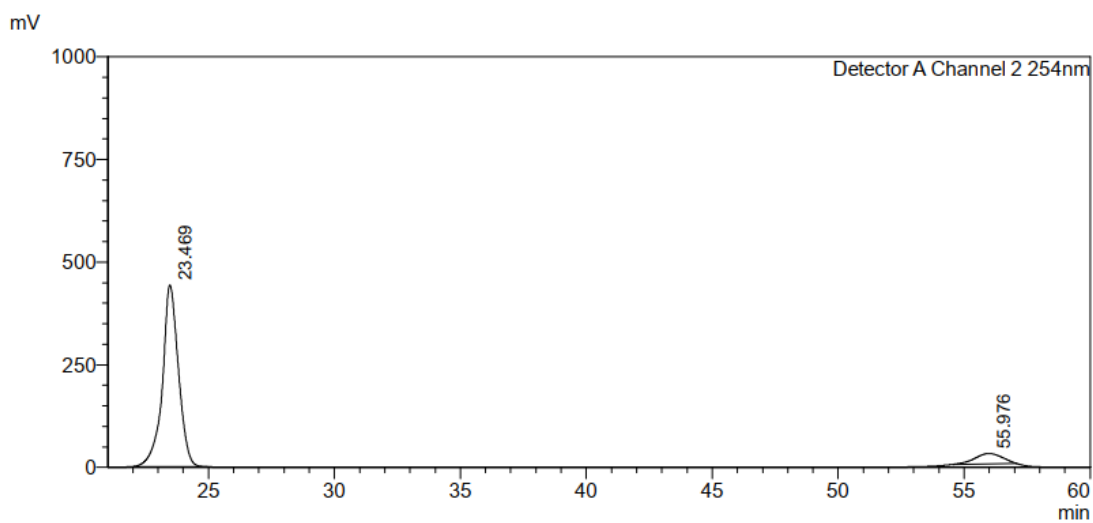

| Peak# | Ret. Time | Area     | Area%   |
|-------|-----------|----------|---------|
| 1     | 23.469    | 19625602 | 91.234  |
| 2     | 55.976    | 1885575  | 8.766   |
| Total |           | 21511177 | 100.000 |

**isopropyl (R)-2-((N-benzylbenzamido)oxy)-2-cyano-4-phenylbutanoate (4q)**

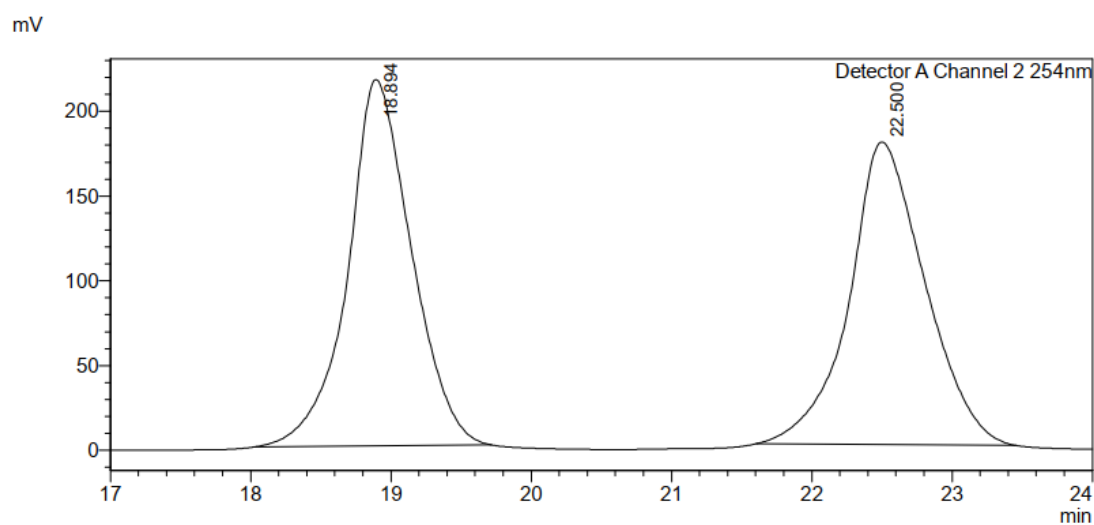

Detector A Channel 2 254nm

| Peak# | Ret. Time | Area     | Area%   |
|-------|-----------|----------|---------|
| 1     | 18.894    | 6838942  | 50.448  |
| 2     | 22.500    | 6717375  | 49.552  |
| Total |           | 13556317 | 100.000 |

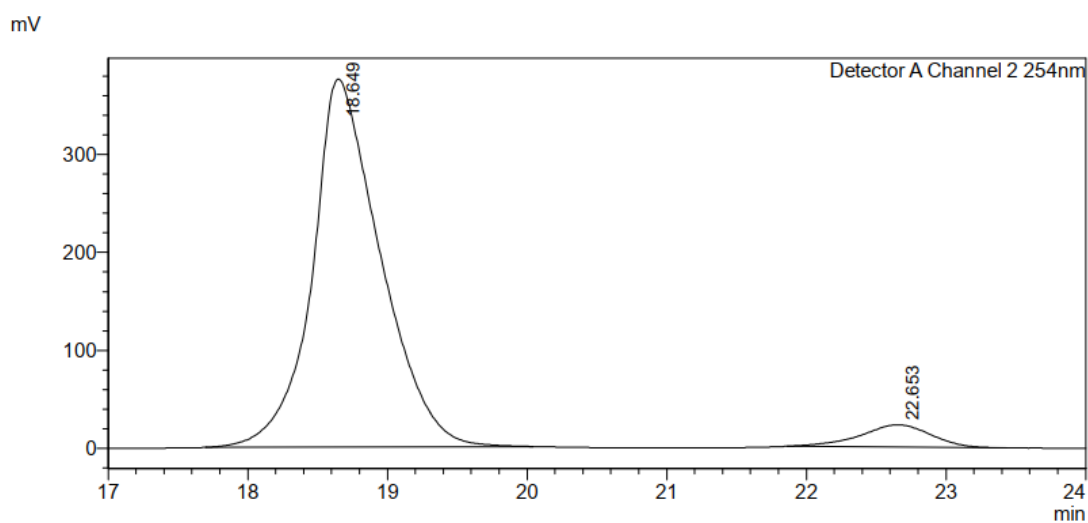

Detector A Channel 2 254nm

| Peak# | Ret. Time | Area     | Area%   |
|-------|-----------|----------|---------|
| 1     | 18.649    | 12794043 | 94.114  |
| 2     | 22.653    | 800172   | 5.886   |
| Total |           | 13594215 | 100.000 |

**isopropyl (R)-2-((N-benzylbenzamido)oxy)-2-cyano-5-phenylpentanoate (4r)**

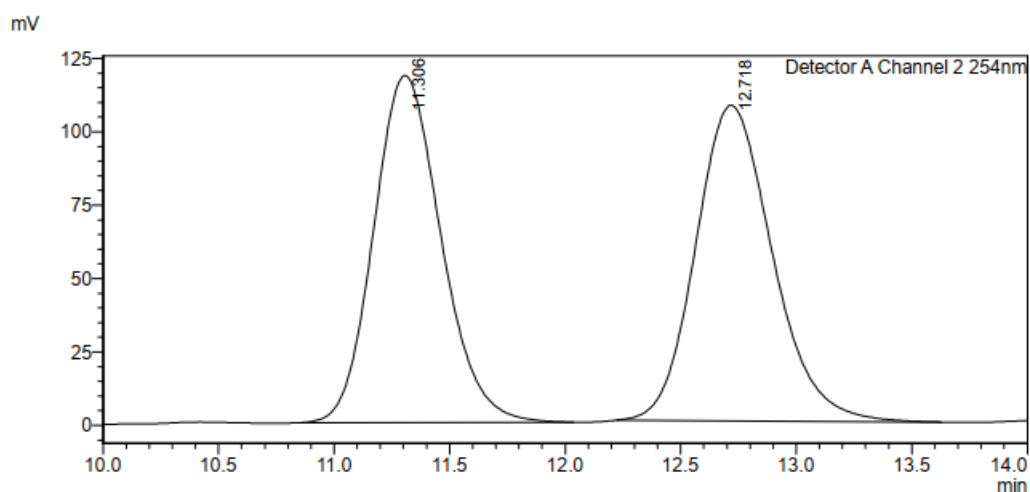

Detector A Channel 2 254nm

| Peak# | Ret. Time | Area    | Area%   |
|-------|-----------|---------|---------|
| 1     | 11.306    | 2397292 | 49.064  |
| 2     | 12.718    | 2488751 | 50.936  |
| Total |           | 4886043 | 100.000 |

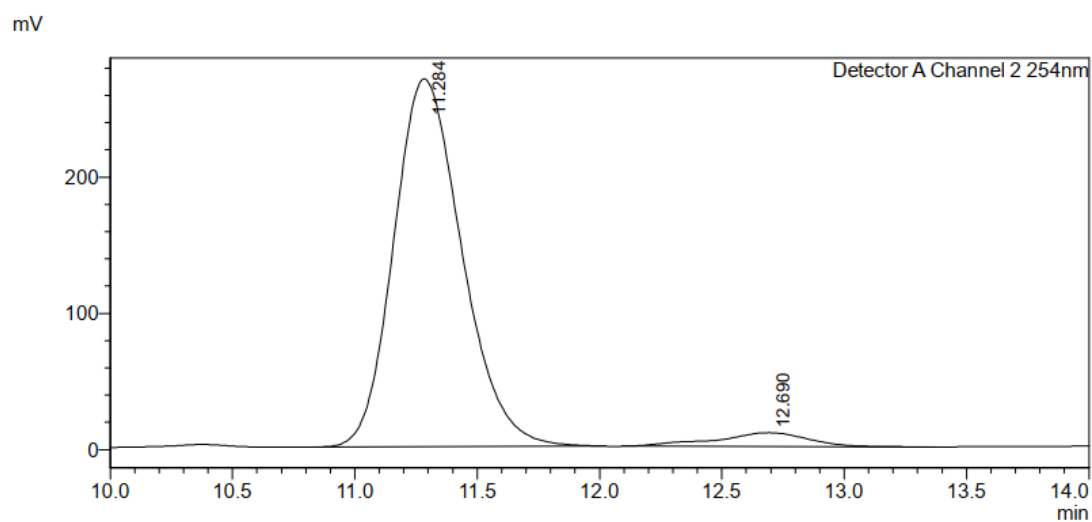

Detector A Channel 2 254nm

| Peak# | Ret. Time | Area    | Area%   |
|-------|-----------|---------|---------|
| 1     | 11.284    | 5245658 | 95.166  |
| 2     | 12.690    | 266433  | 4.834   |
| Total |           | 5512091 | 100.000 |

isopropyl (R)-2-((N-benzylbenzamido)oxy)-2-cyanopropanoate (4s)

mV

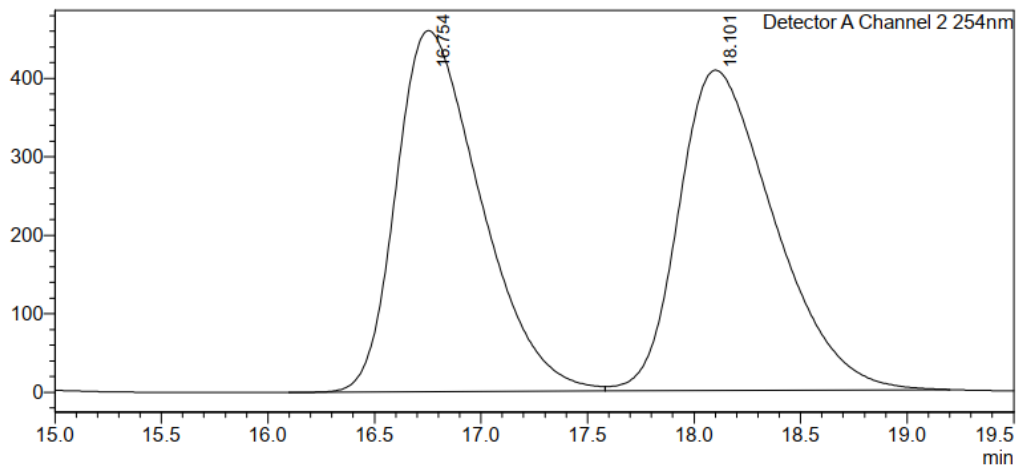

Detector A Channel 2 254nm

| Peak# | Ret. Time | Area     | Area%   |
|-------|-----------|----------|---------|
| 1     | 16.754    | 12717097 | 49.980  |
| 2     | 18.101    | 12727212 | 50.020  |
| Total |           | 25444310 | 100.000 |

mV

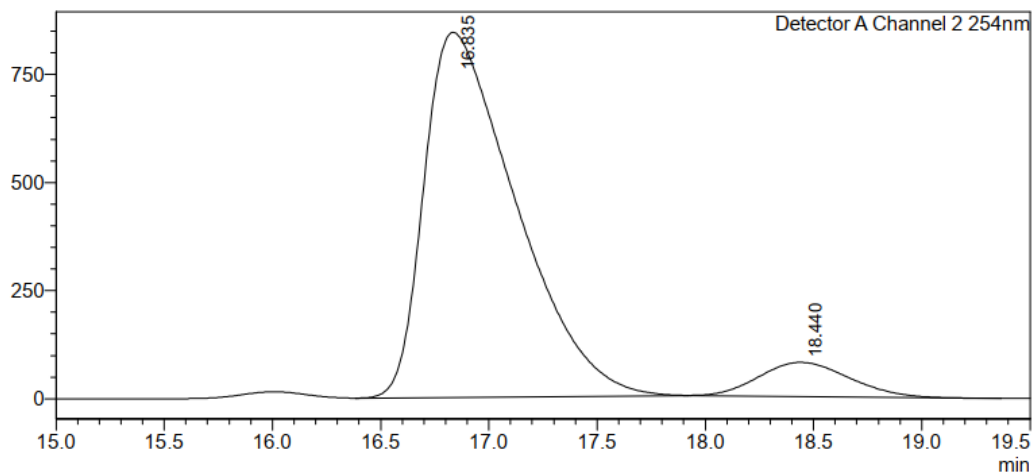

Detector A Channel 2 254nm

| Peak# | Ret. Time | Area     | Area%   |
|-------|-----------|----------|---------|
| 1     | 16.835    | 24912260 | 91.584  |
| 2     | 18.440    | 2289242  | 8.416   |
| Total |           | 27201502 | 100.000 |



### isopropyl (R)-2-((N-benzylbenzamido)oxy)-2-cyanobutanoate (4t)

mV

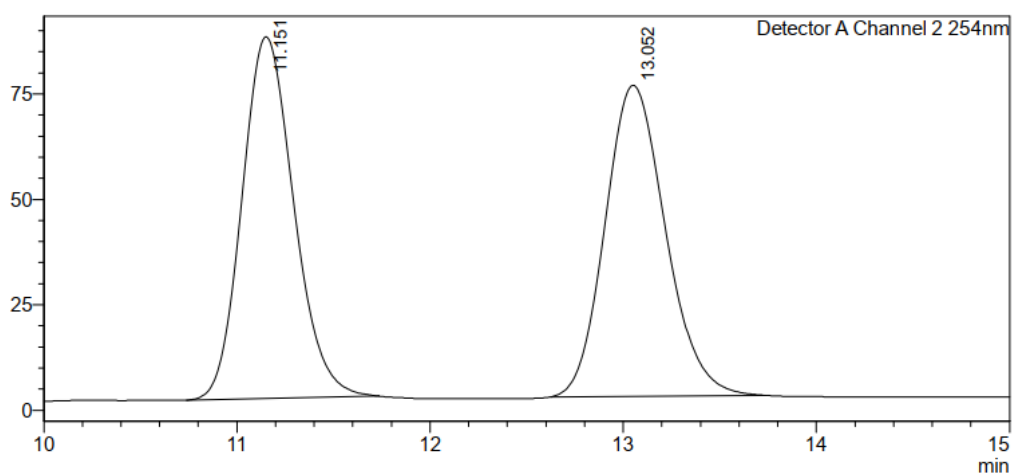

Detector A Channel 2 254nm

| Peak# | Ret. Time | Area    | Area%   |
|-------|-----------|---------|---------|
| 1     | 11.151    | 1605123 | 49.995  |
| 2     | 13.052    | 1605475 | 50.005  |
| Total |           | 3210598 | 100.000 |

mV

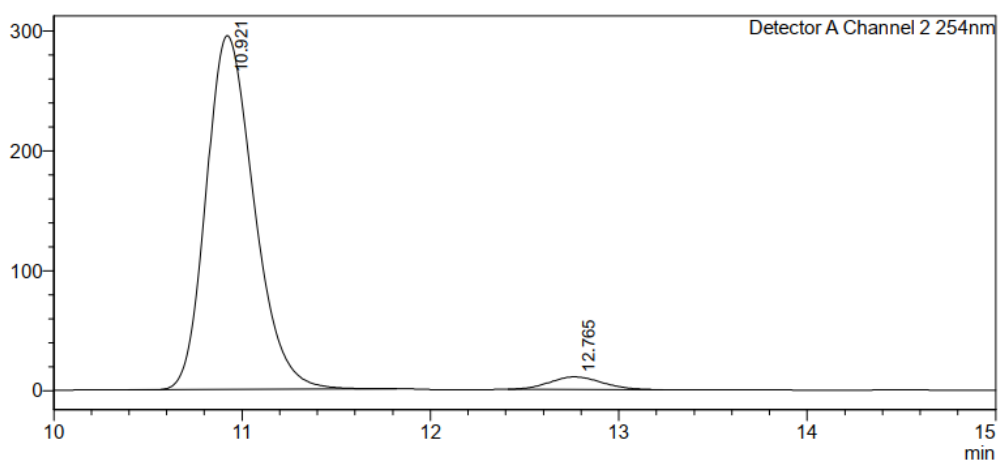

Detector A Channel 2 254nm

| Peak# | Ret. Time | Area    | Area%   |
|-------|-----------|---------|---------|
| 1     | 10.921    | 5192102 | 96.214  |
| 2     | 12.765    | 204292  | 3.786   |
| Total |           | 5396395 | 100.000 |

isopropyl (R)-2-((N-benzylbenzamido)oxy)-2-cyano-5-methylhexanoate (4u)

mV

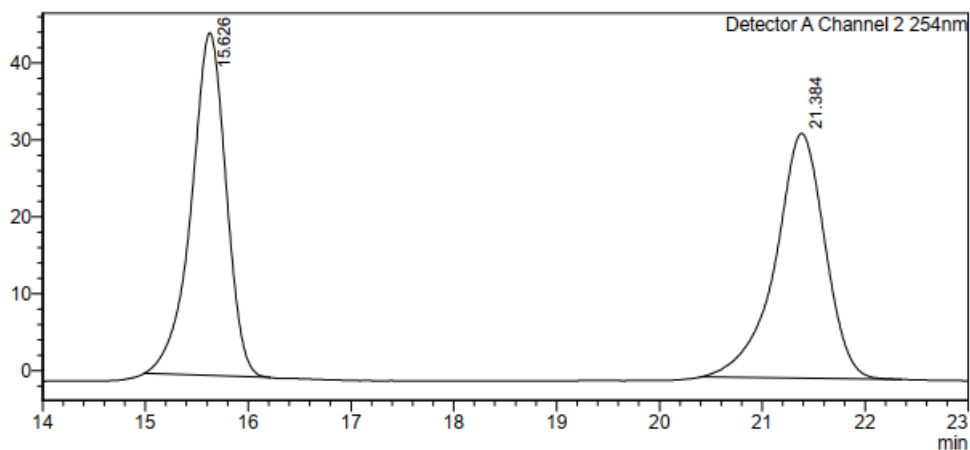

Detector A Channel 2 254nm

| Peak# | Ret. Time | Area    | Area%   |
|-------|-----------|---------|---------|
| 1     | 15.626    | 1050773 | 49.586  |
| 2     | 21.384    | 1068298 | 50.414  |
| Total |           | 2119071 | 100.000 |

mV

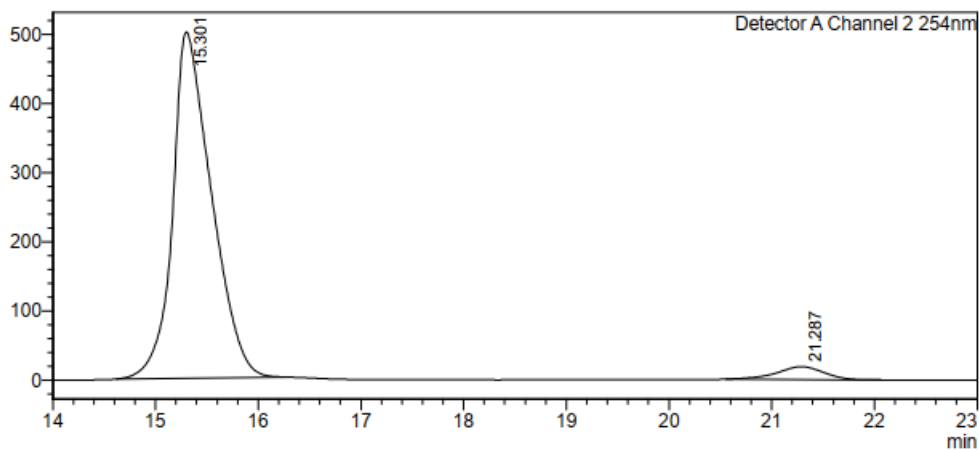

Detector A Channel 2 254nm

| Peak# | Ret. Time | Area     | Area%   |
|-------|-----------|----------|---------|
| 1     | 15.301    | 13199608 | 95.731  |
| 2     | 21.287    | 588618   | 4.269   |
| Total |           | 13788226 | 100.000 |

**isopropyl (R)-2-((N-benzylbenzamido)oxy)-2-cyanopent-4-enoate (4v)**

mV

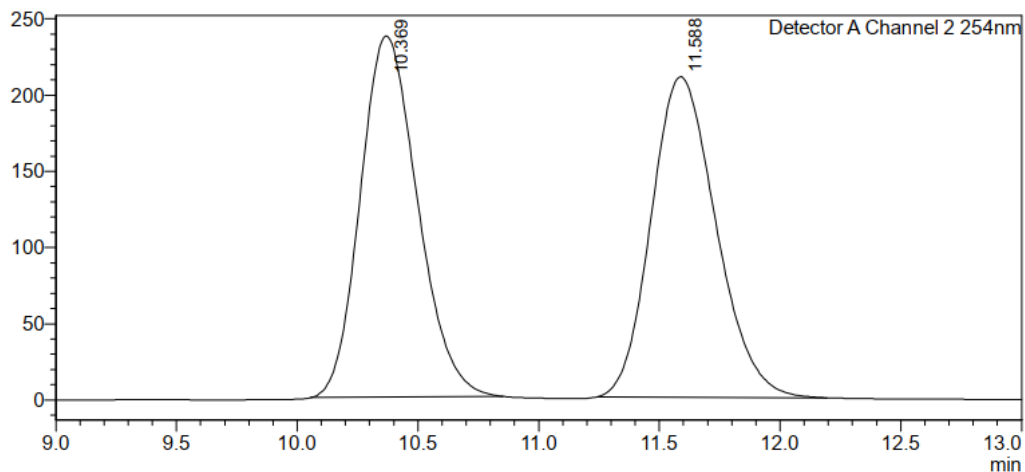

Detector A Channel 2 254nm

| Peak# | Ret. Time | Area    | Area%   |
|-------|-----------|---------|---------|
| 1     | 10.369    | 3911251 | 49.902  |
| 2     | 11.588    | 3926535 | 50.098  |
| Total |           | 7837786 | 100.000 |

mV

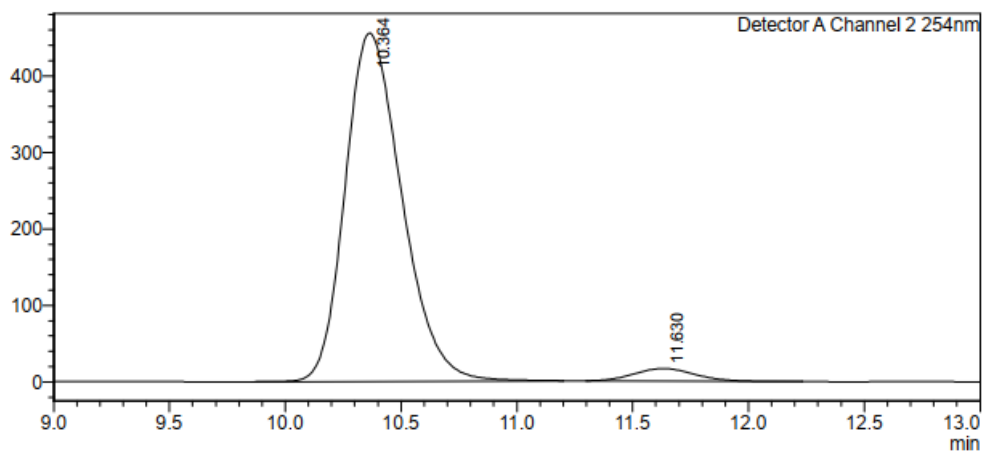

Detector A Channel 2 254nm

| Peak# | Ret. Time | Area    | Area%   |
|-------|-----------|---------|---------|
| 1     | 10.364    | 7762672 | 96.308  |
| 2     | 11.630    | 297599  | 3.692   |
| Total |           | 8060271 | 100.000 |

**isopropyl 2-((N-benzylbenzamido)oxy)-2-cyano-4-methylpent-4-enoate (4w)**

mV

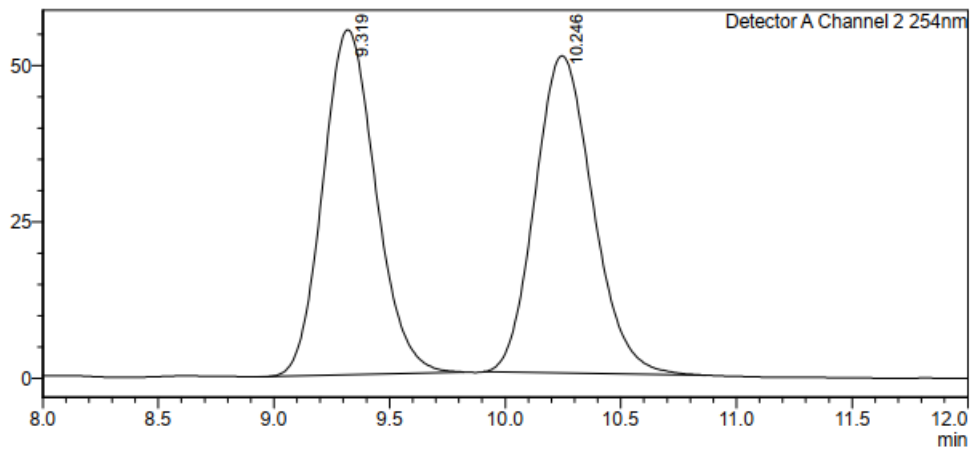

Detector A Channel 2 254nm

| Peak# | Ret. Time | Area    | Area%   |
|-------|-----------|---------|---------|
| 1     | 9.319     | 875933  | 49.786  |
| 2     | 10.246    | 883467  | 50.214  |
| Total |           | 1759399 | 100.000 |

mV

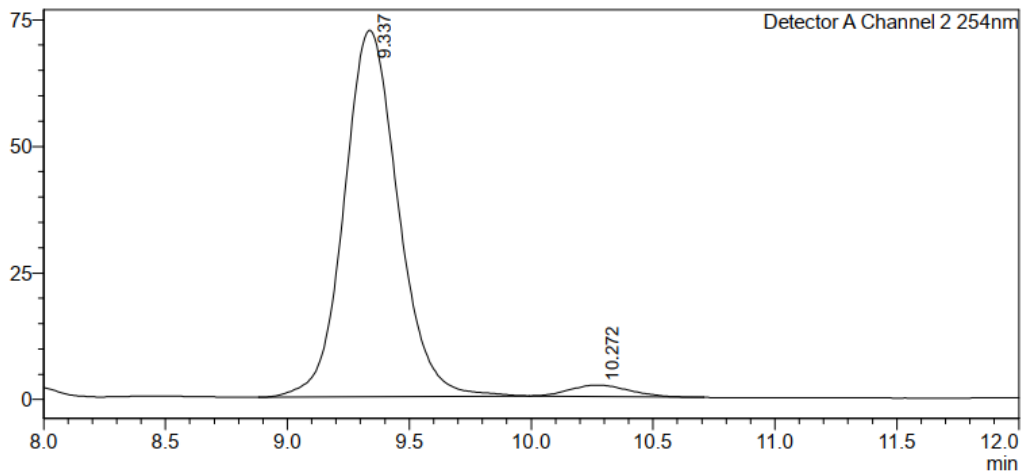

Detector A Channel 2 254nm

| Peak# | Ret. Time | Area    | Area%   |
|-------|-----------|---------|---------|
| 1     | 9.337     | 1115410 | 96.729  |
| 2     | 10.272    | 37714   | 3.271   |
| Total |           | 1153124 | 100.000 |

### isopropyl (R)-2-((N-benzylbenzamido)oxy)-2-cyanohept-6-enoate (4x)

mV

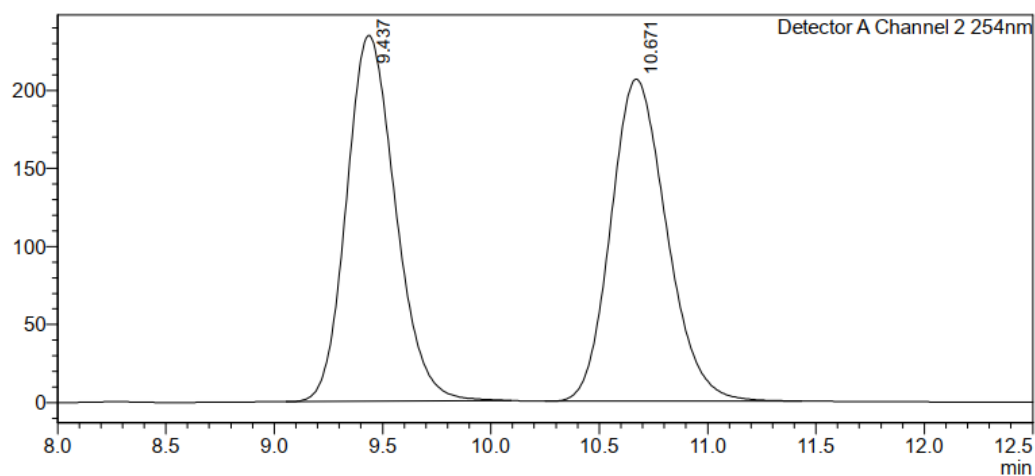

Detector A Channel 2 254nm

| Peak# | Ret. Time | Area    | Area%   |
|-------|-----------|---------|---------|
| 1     | 9.437     | 3685664 | 49.928  |
| 2     | 10.671    | 3696343 | 50.072  |
| Total |           | 7382006 | 100.000 |

mV

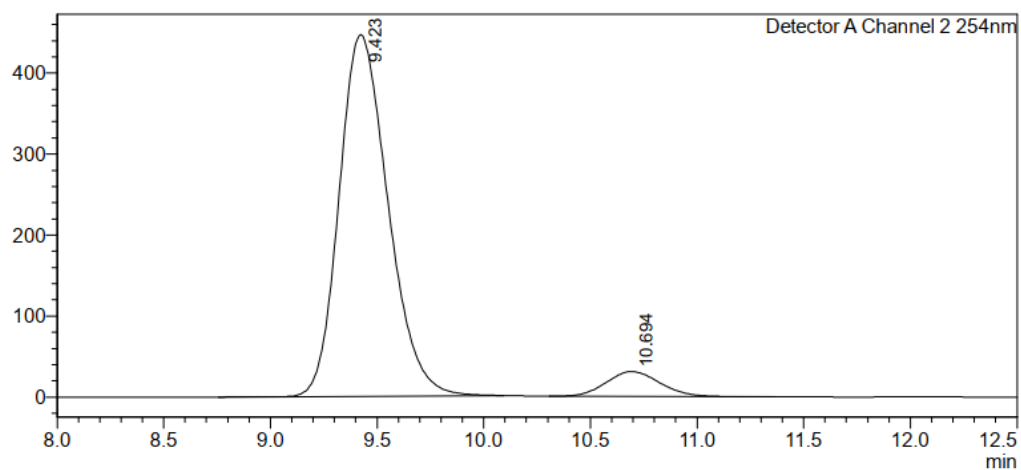

Detector A Channel 2 254nm

| Peak# | Ret. Time | Area    | Area%   |
|-------|-----------|---------|---------|
| 1     | 9.423     | 7125249 | 92.961  |
| 2     | 10.694    | 539558  | 7.039   |
| Total |           | 7664808 | 100.000 |

**isopropyl (R)-2-((N-benzylbenzamido)oxy)-2-cyanoct-7-enoate (4y)**

mV

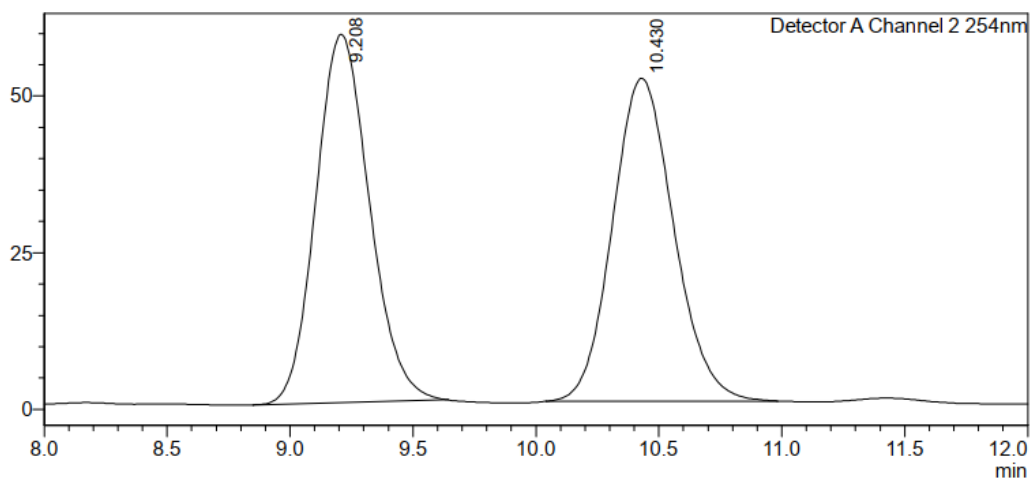

Detector A Channel 2 254nm

| Peak# | Ret. Time | Area    | Area%   |
|-------|-----------|---------|---------|
| 1     | 9.208     | 891966  | 49.942  |
| 2     | 10.430    | 894037  | 50.058  |
| Total |           | 1786003 | 100.000 |

mV

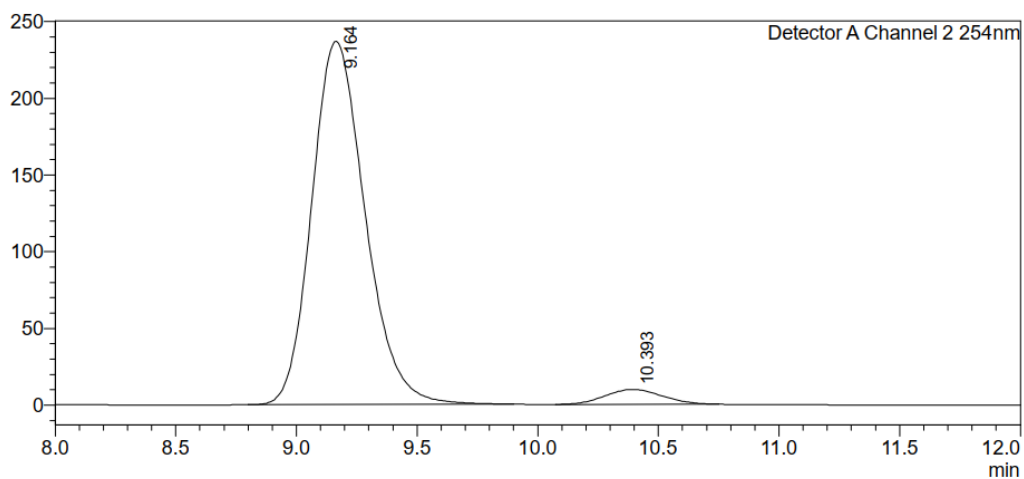

Detector A Channel 2 254nm

| Peak# | Ret. Time | Area    | Area%   |
|-------|-----------|---------|---------|
| 1     | 9.164     | 3640851 | 95.750  |
| 2     | 10.393    | 161605  | 4.250   |
| Total |           | 3802456 | 100.000 |

isopropyl (R)-2-cyano-2-(4-methoxyphenoxy)-4-phenylbutanoate (6a)

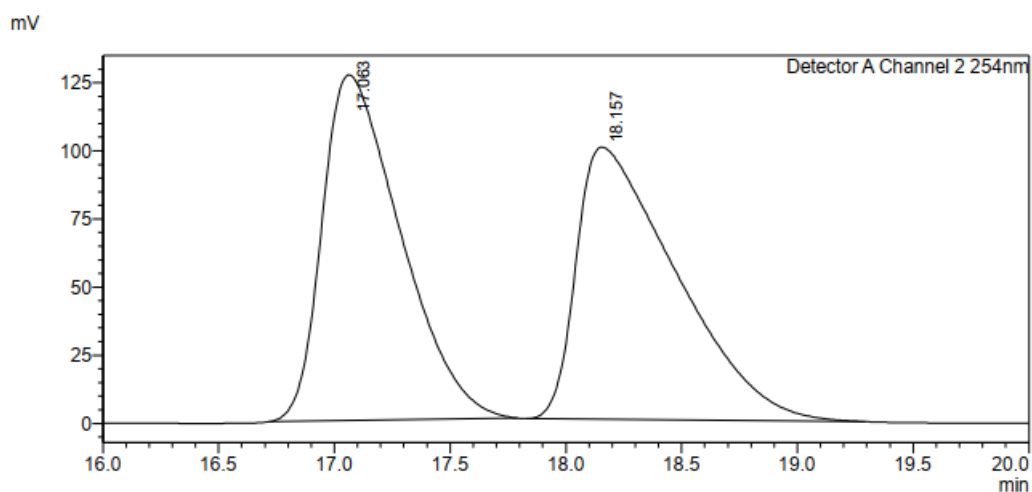

Detector A Channel 2 254nm

| Peak# | Ret. Time | Area    | Area%   |
|-------|-----------|---------|---------|
| 1     | 17.063    | 2996419 | 49.971  |
| 2     | 18.157    | 2999923 | 50.029  |
| Total |           | 5996342 | 100.000 |

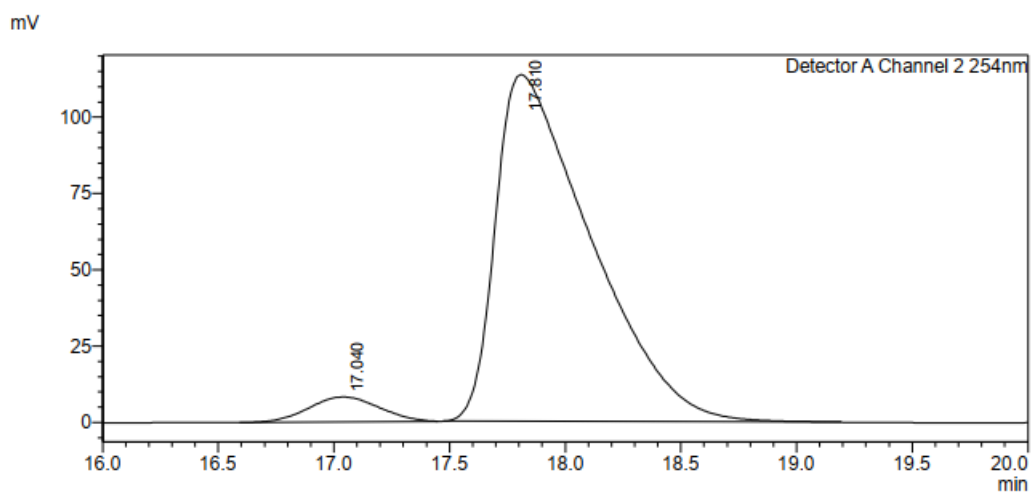

Detector A Channel 2 254nm

| Peak# | Ret. Time | Area    | Area%   |
|-------|-----------|---------|---------|
| 1     | 17.040    | 172519  | 5.043   |
| 2     | 17.810    | 3248118 | 94.957  |
| Total |           | 3420637 | 100.000 |

**isopropyl (R)-2-cyano-2-(4-methoxyphenoxy)pent-4-enoate (6b)**

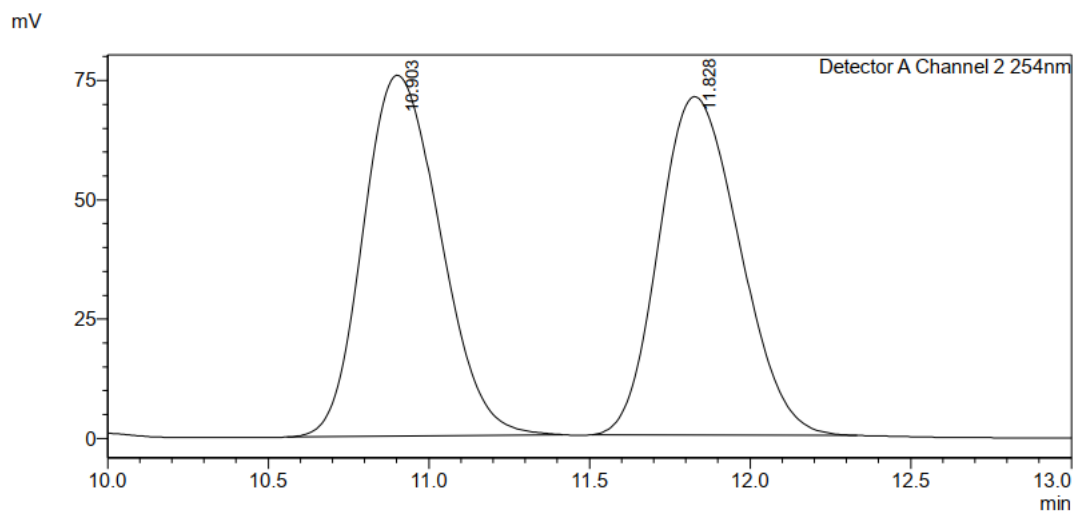

Detector A Channel 2 254nm

| Peak# | Ret. Time | Area    | Area%   |
|-------|-----------|---------|---------|
| 1     | 10.903    | 1260413 | 50.396  |
| 2     | 11.828    | 1240628 | 49.604  |
| Total |           | 2501042 | 100.000 |

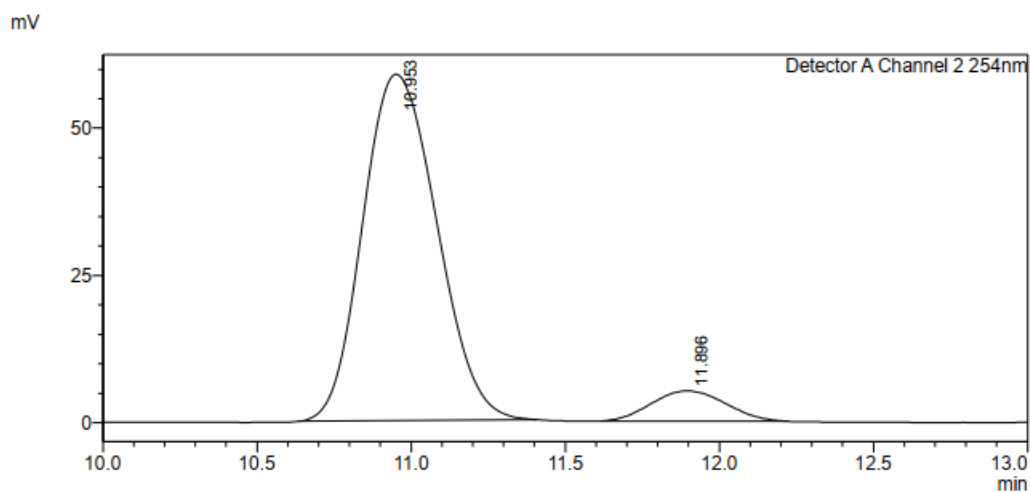

Detector A Channel 2 254nm

| Peak# | Ret. Time | Area    | Area%   |
|-------|-----------|---------|---------|
| 1     | 10.953    | 982521  | 91.960  |
| 2     | 11.896    | 85897   | 8.040   |
| Total |           | 1068418 | 100.000 |



**isopropyl (R)-2-cyano-2-(4-methoxyphenoxy)hept-6-enoate (6c)**

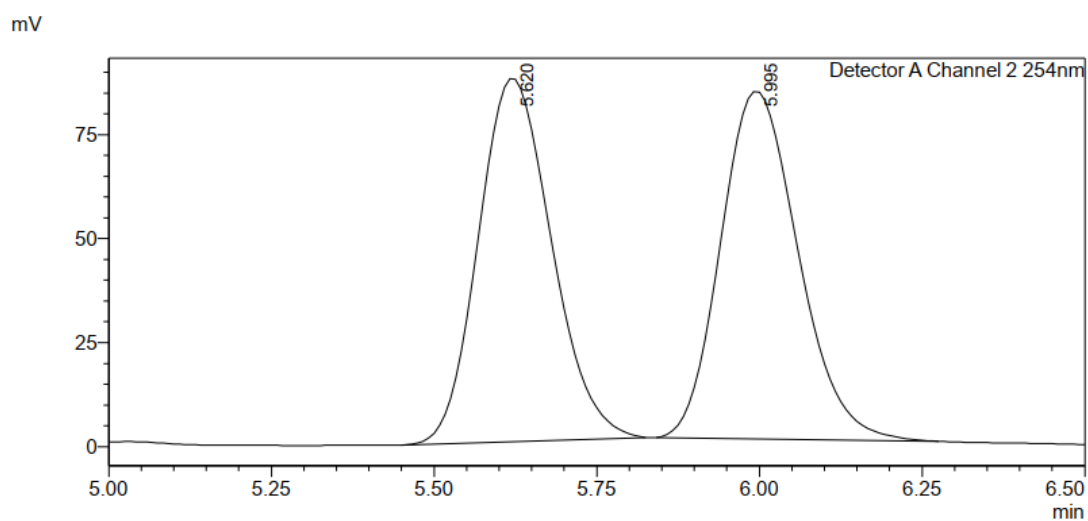

Detector A Channel 2 254nm

| Peak# | Ret. Time | Area    | Area%   |
|-------|-----------|---------|---------|
| 1     | 5.620     | 685253  | 49.839  |
| 2     | 5.995     | 689679  | 50.161  |
| Total |           | 1374932 | 100.000 |

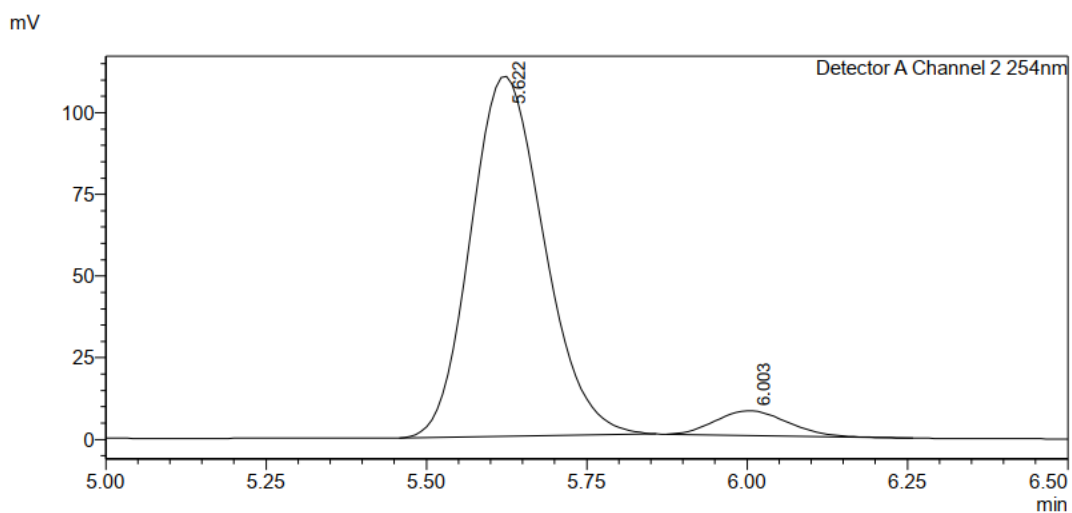

Detector A Channel 2 254nm

| Peak# | Ret. Time | Area   | Area%   |
|-------|-----------|--------|---------|
| 1     | 5.622     | 879156 | 93.749  |
| 2     | 6.003     | 58619  | 6.251   |
| Total |           | 937775 | 100.000 |

### isopropyl (R)-2-cyano-2-(4-methoxyphenoxy)oct-7-enoate (6d)

mV

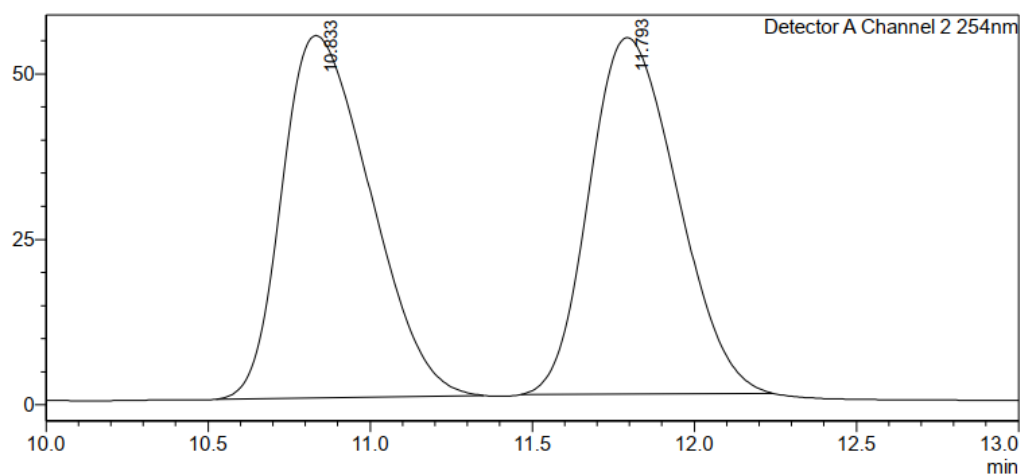

Detector A Channel 2 254nm

| Peak# | Ret. Time | Area    | Area%   |
|-------|-----------|---------|---------|
| 1     | 10.833    | 1035872 | 50.460  |
| 2     | 11.793    | 1017001 | 49.540  |
| Total |           | 2052873 | 100.000 |

mV

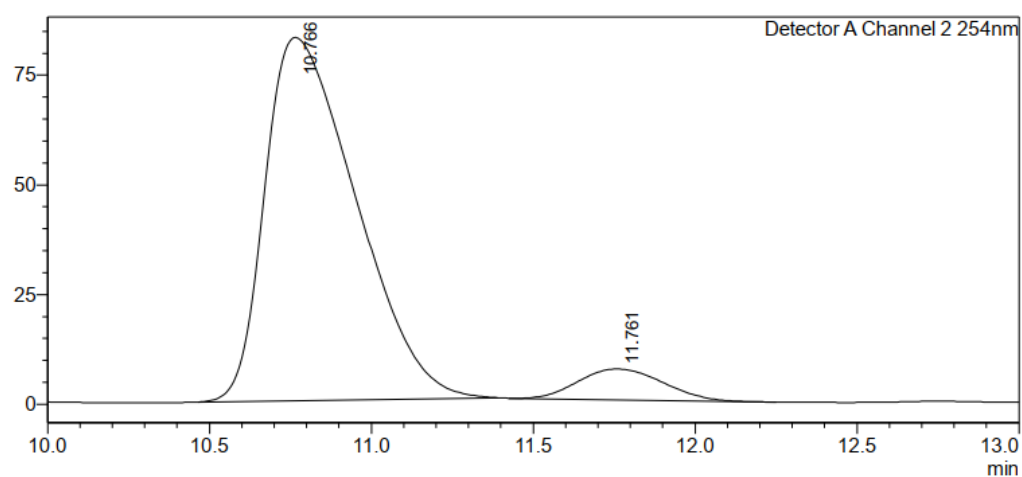

Detector A Channel 2 254nm

| Peak# | Ret. Time | Area    | Area%   |
|-------|-----------|---------|---------|
| 1     | 10.766    | 1618604 | 92.683  |
| 2     | 11.761    | 127791  | 7.317   |
| Total |           | 1746395 | 100.000 |

isopropyl (R)-2-cyano-2-(4-methoxyphenoxy)hexanoate (6e)

mV

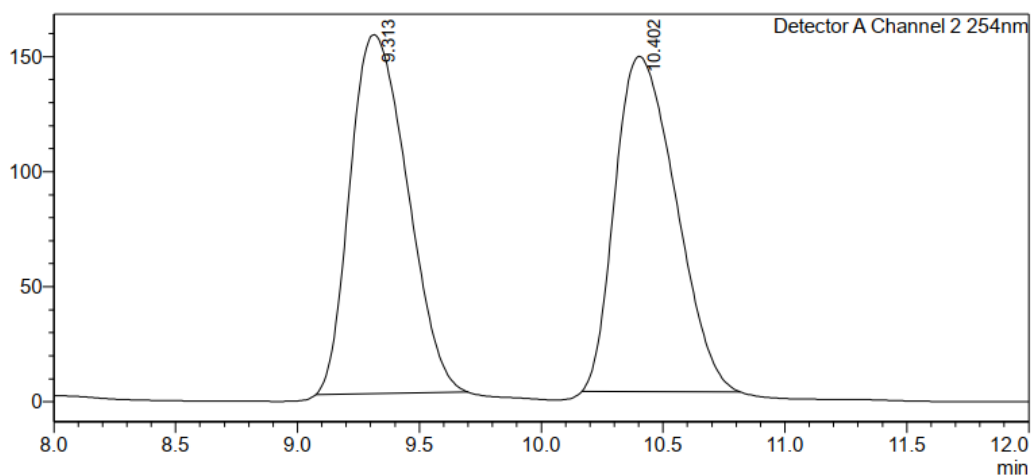

Detector A Channel 2 254nm

| Peak# | Ret. Time | Area    | Area%   |
|-------|-----------|---------|---------|
| 1     | 9.313     | 2551408 | 50.223  |
| 2     | 10.402    | 2528711 | 49.777  |
| Total |           | 5080119 | 100.000 |

mV

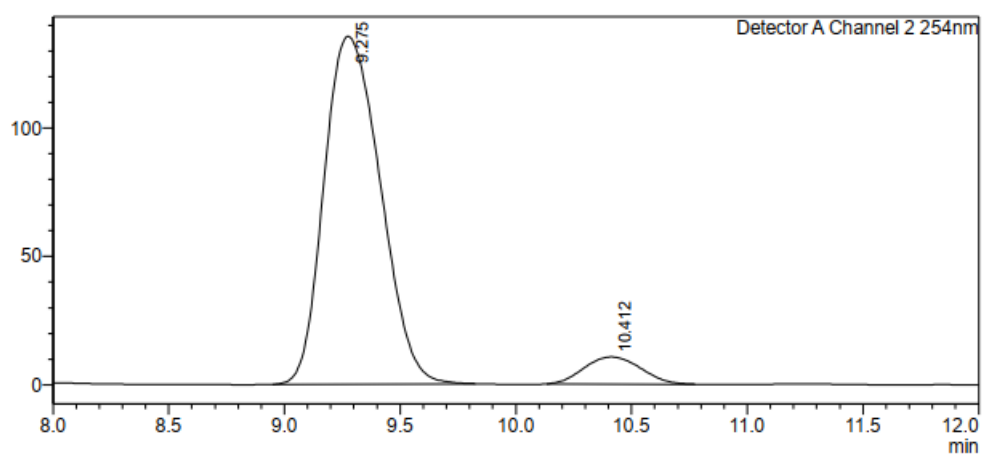

Detector A Channel 2 254nm

| Peak# | Ret. Time | Area    | Area%   |
|-------|-----------|---------|---------|
| 1     | 9.275     | 2292171 | 92.736  |
| 2     | 10.412    | 179559  | 7.264   |
| Total |           | 2471730 | 100.000 |

isopropyl (R)-2-cyano-2-(4-methoxyphenoxy)propanoate (6f)

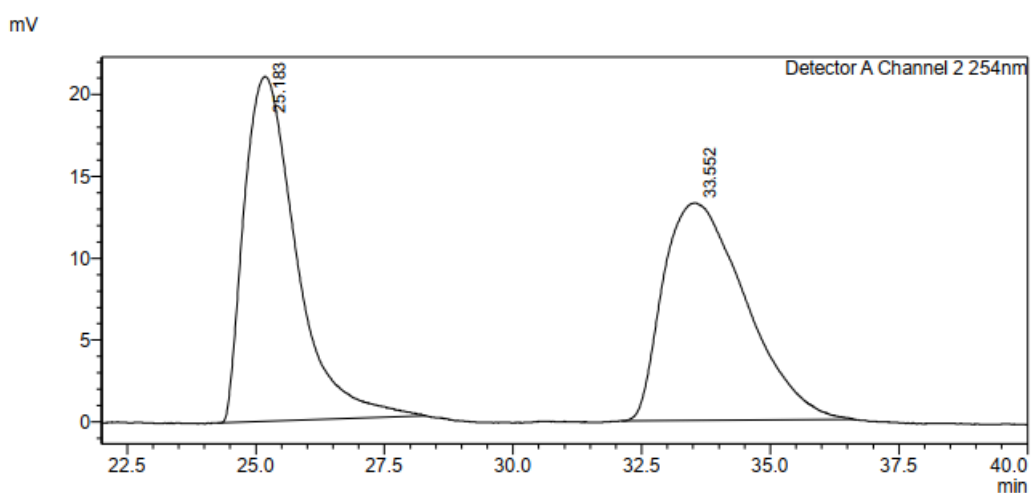

| Detector A Channel 2 254nm |           |         |         |
|----------------------------|-----------|---------|---------|
| Peak#                      | Ret. Time | Area    | Area%   |
| 1                          | 25.183    | 1489927 | 50.127  |
| 2                          | 33.552    | 1482370 | 49.873  |
| Total                      |           | 2972296 | 100.000 |

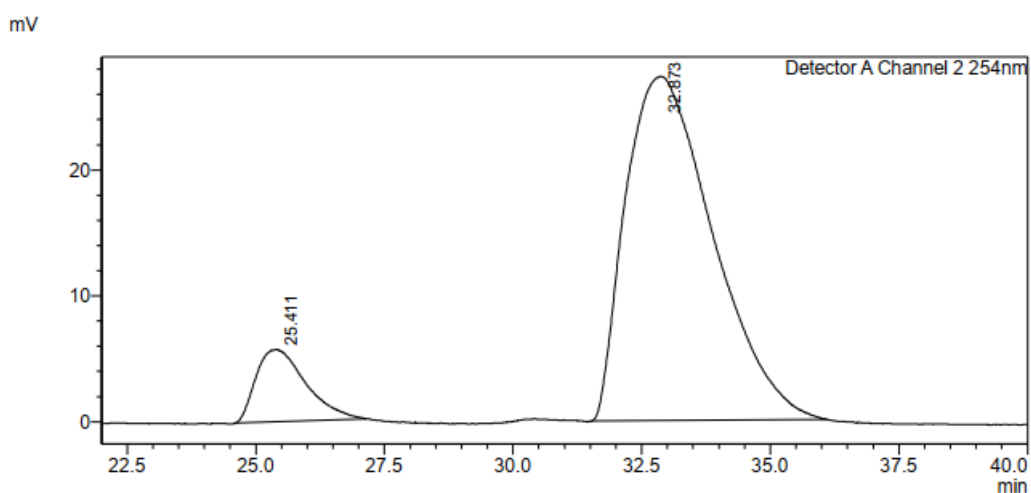

| Detector A Channel 2 254nm |           |         |         |
|----------------------------|-----------|---------|---------|
| Peak#                      | Ret. Time | Area    | Area%   |
| 1                          | 25.411    | 384777  | 10.639  |
| 2                          | 32.873    | 3231831 | 89.361  |
| Total                      |           | 3616608 | 100.000 |

isopropyl (R)-2-cyano-4-phenyl-2-(p-tolyloxy)butanoate (6g)

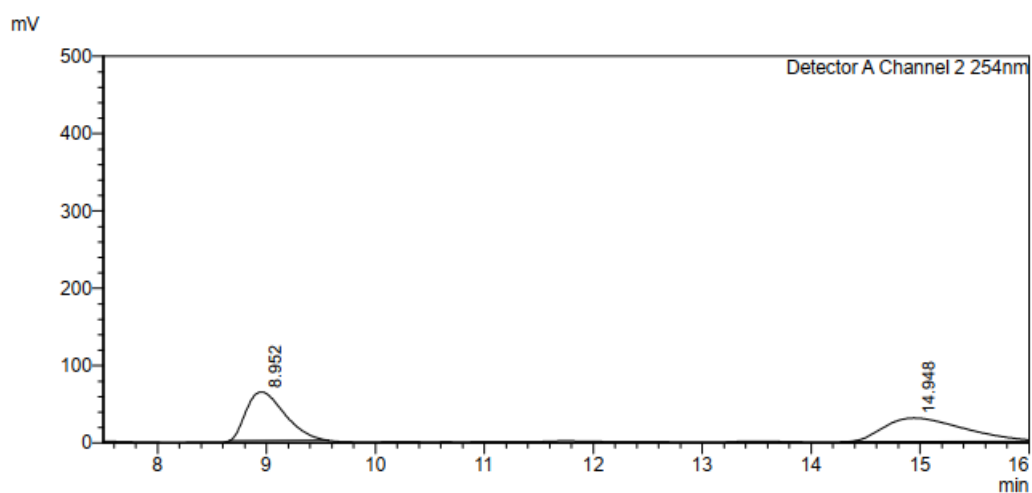

Detector A Channel 2 254nm

| Peak# | Ret. Time | Area    | Area%   |
|-------|-----------|---------|---------|
| 1     | 8.952     | 1554171 | 49.101  |
| 2     | 14.948    | 1611056 | 50.899  |
| Total |           | 3165226 | 100.000 |

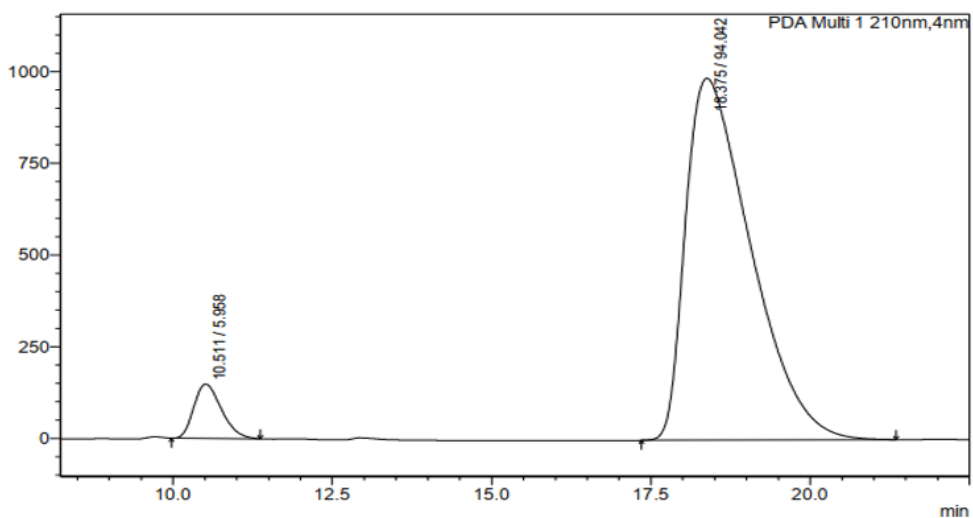

Detector A Channel 2 254nm

| Peak# | Ret. Time | Area    | Area%  |
|-------|-----------|---------|--------|
| 1     | 10.517    | 125225  | 5.607  |
| 2     | 18.382    | 2108216 | 94.393 |
| Total |           | 2233442 | 100    |

isopropyl (R)-2-cyano-2-(p-tolyloxy)hexanoate (6h)

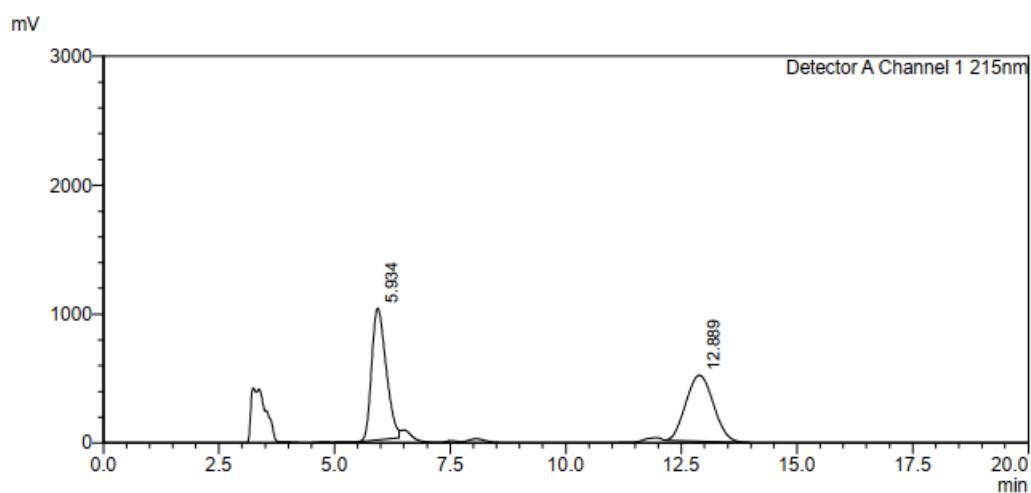

Detector A Channel 2 254nm

| Peak# | Ret. Time | Area    | Area%   |
|-------|-----------|---------|---------|
| 1     | 5.933     | 747972  | 49.898  |
| 2     | 12.887    | 751044  | 50.102  |
| Total |           | 1499016 | 100.000 |

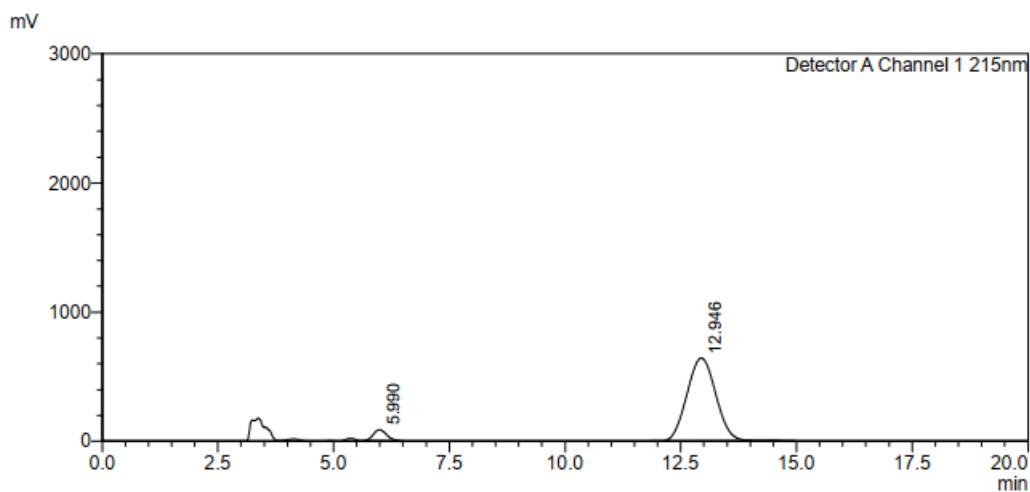

Detector A Channel 2 254nm

| Peak# | Ret. Time | Area    | Area%   |
|-------|-----------|---------|---------|
| 1     | 5.982     | 62037   | 5.534   |
| 2     | 12.945    | 1059060 | 94.466  |
| Total |           | 1121097 | 100.000 |

isopropyl (R)-2-cyano-2-(p-tolyloxy)hept-6-enoate (6i)

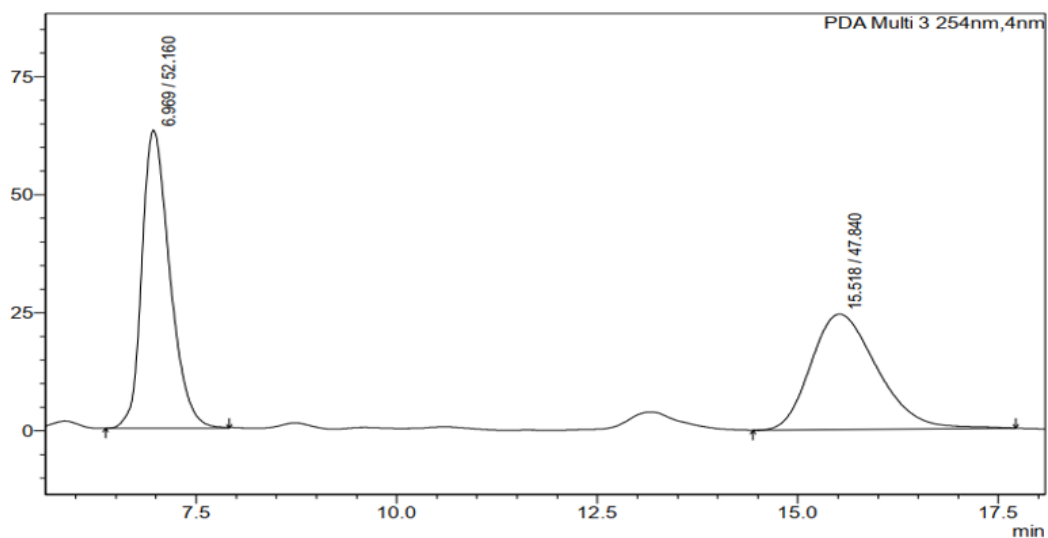

Detector A Channel 2 254nm

| Peak# | Ret. Time | Area    | Area%  |
|-------|-----------|---------|--------|
| 1     | 6.971     | 5013997 | 50.348 |
| 2     | 15.517    | 4750674 | 49.652 |
| Total |           | 9764671 | 100    |

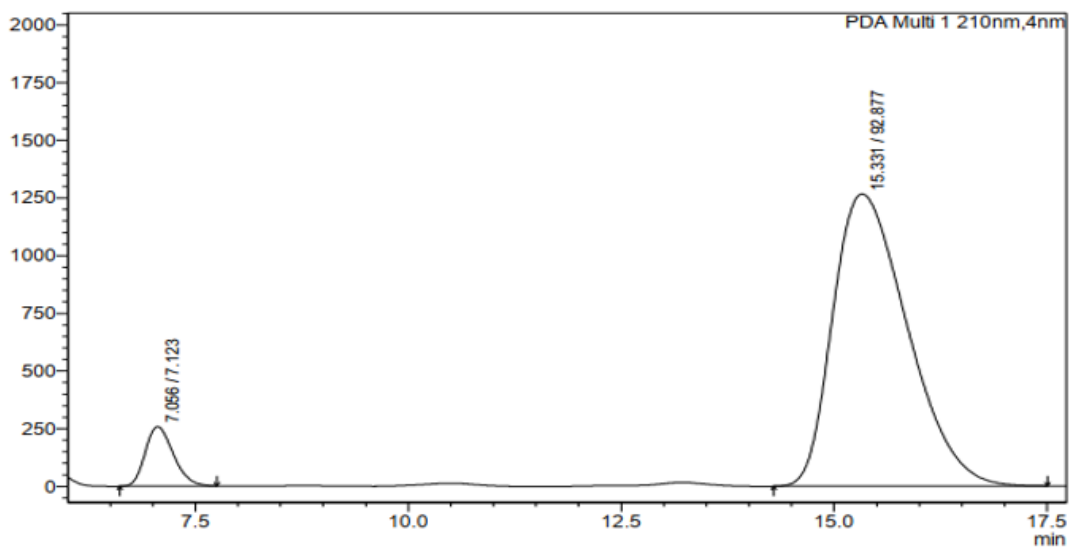

Detector A Channel 2 254nm

| Peak# | Ret. Time | Area     | Area%  |
|-------|-----------|----------|--------|
| 1     | 7.063     | 859566   | 7.146  |
| 2     | 15.328    | 11168278 | 92.854 |
| Total |           | 12027843 | 100    |

isopropyl (R)-2-cyano-2-(p-tolyloxy)oct-7-enoate (6j)

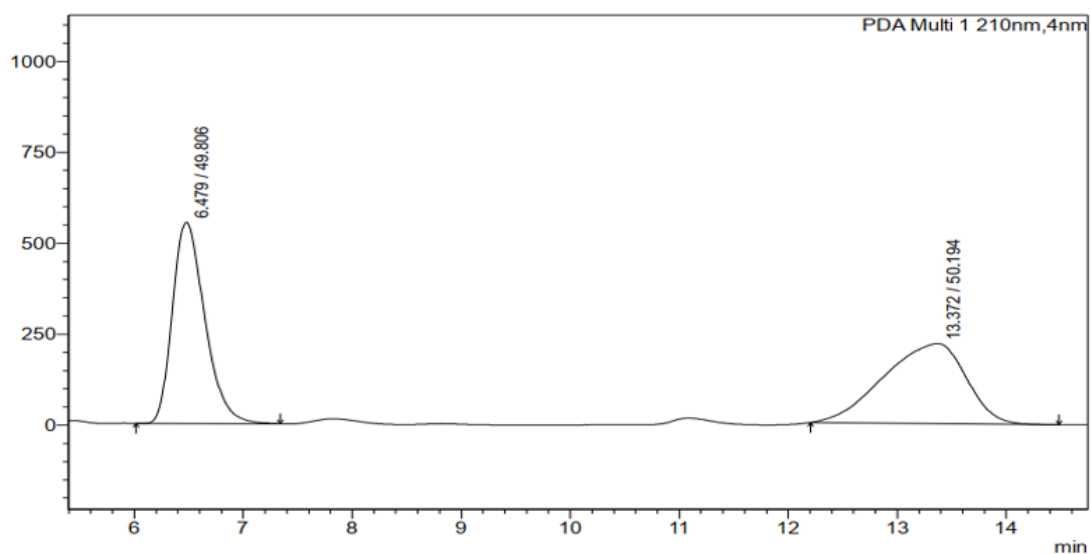

Detector A Channel 2 254nm

| Peak# | Ret. Time | Area     | Area%  |
|-------|-----------|----------|--------|
| 1     | 6.479     | 11445646 | 49.806 |
| 2     | 13.372    | 11534973 | 50.194 |
| Total |           | 22980619 | 100    |

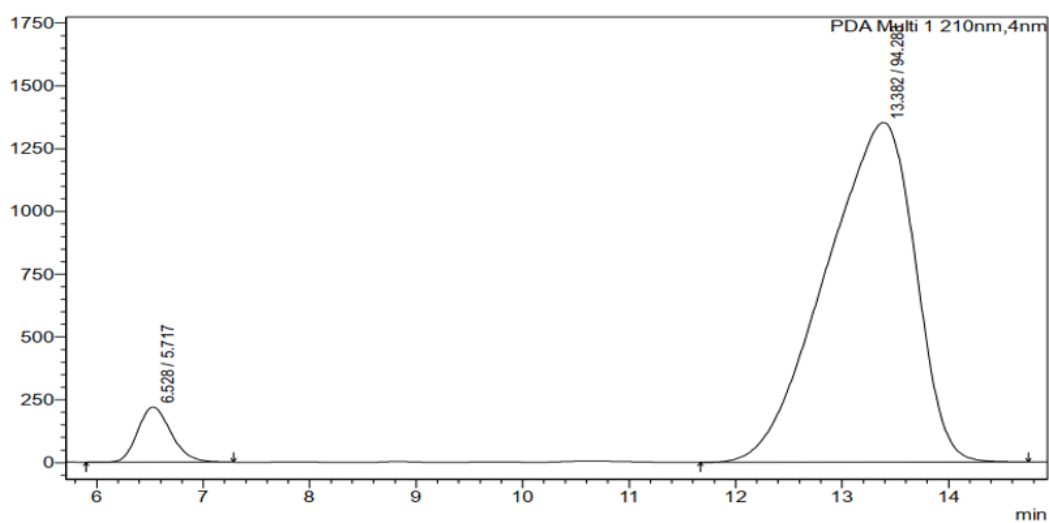

Detector A Channel 2 254nm

| Peak# | Ret. Time | Area     | Area%  |
|-------|-----------|----------|--------|
| 1     | 6.528     | 4783409  | 5.717  |
| 2     | 13.382    | 78884007 | 94.283 |
| Total |           | 83667416 | 100    |



isopropyl (R)-2-cyano-2-(p-tolyloxy)butanoate (6k)

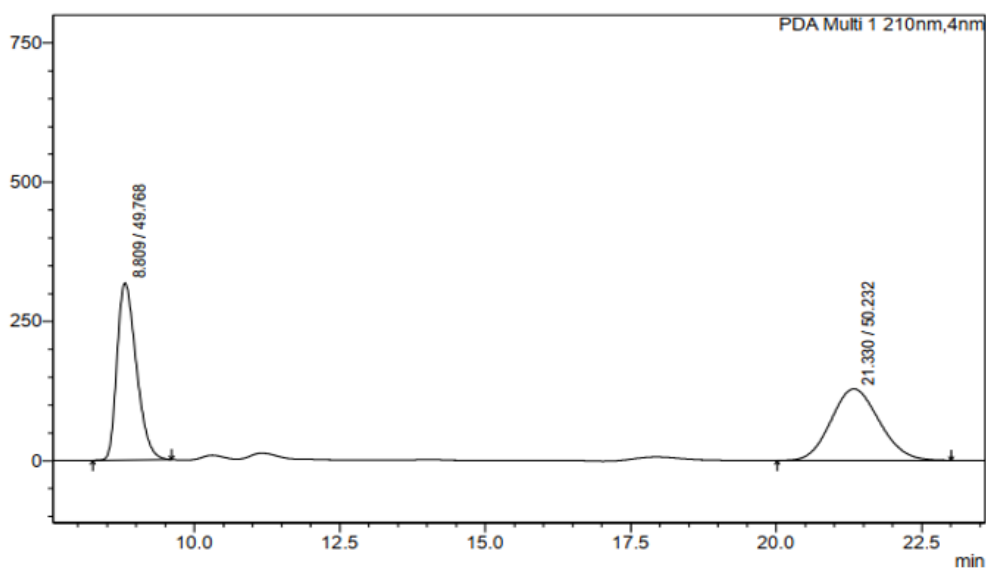

Detector A Channel 2 254nm

| Peak# | Ret. Time | Area     | Area%  |
|-------|-----------|----------|--------|
| 1     | 8.809     | 7348775  | 49.768 |
| 2     | 21.33     | 7417383  | 50.232 |
| Total |           | 14766157 | 100    |

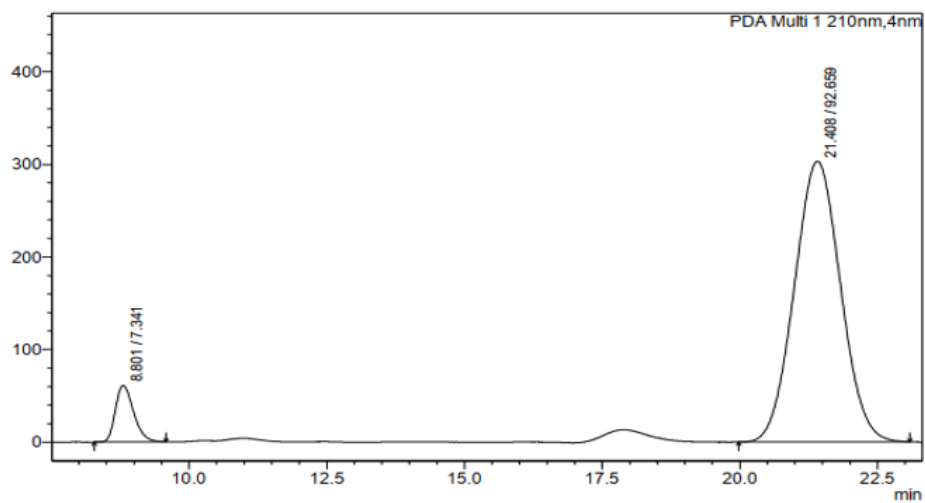

Detector A Channel 2 254nm

| Peak# | Ret. Time | Area     | Area%  |
|-------|-----------|----------|--------|
| 1     | 8.801     | 1401468  | 7.341  |
| 2     | 21.408    | 17690278 | 92.659 |
| Total |           | 19091745 | 100    |

isopropyl (R)-2-(4-bromophenoxy)-2-cyanobutanoate (6l)

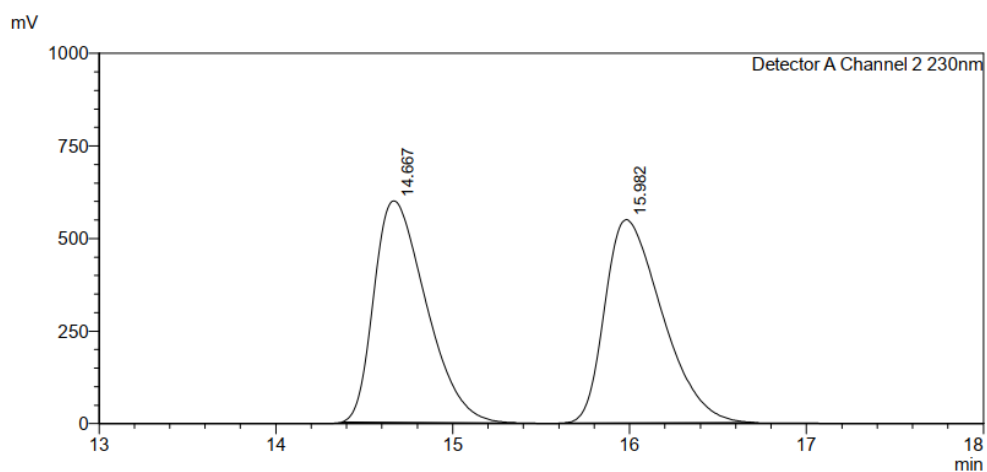

Detector A Channel 2 230nm

| Peak# | Ret. Time | Area     | Area%   |
|-------|-----------|----------|---------|
| 1     | 14.667    | 12189269 | 49.619  |
| 2     | 15.982    | 12376333 | 50.381  |
| Total |           | 24565602 | 100.000 |

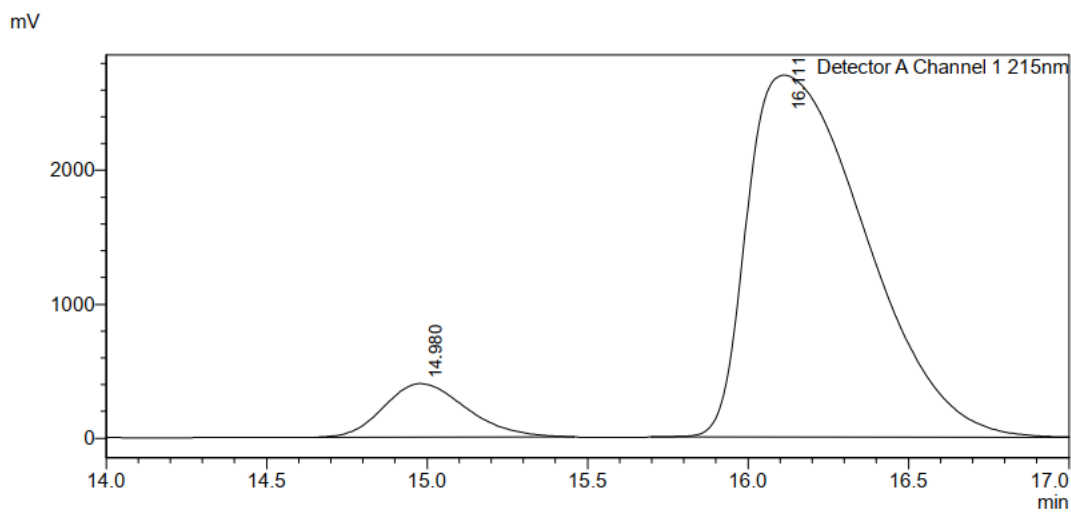

Detector A Channel 2 254nm

| Peak# | Ret. Time | Area    | Area%   |
|-------|-----------|---------|---------|
| 1     | 14.980    | 312938  | 8.051   |
| 2     | 16.111    | 3574139 | 91.949  |
| Total |           | 3887076 | 100.000 |

(R)-2-(4-bromophenoxy)-2-cyanobutyl methanesulfonate (13-Me)

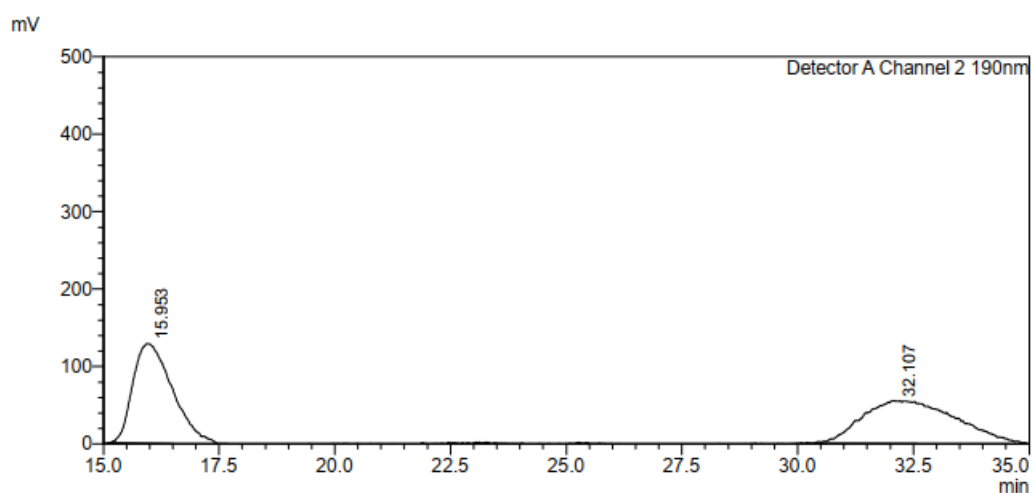

Detector A Channel 2 190nm

| Peak# | Ret. Time | Area     | Area%   |
|-------|-----------|----------|---------|
| 1     | 15.953    | 7782356  | 49.614  |
| 2     | 32.107    | 7903578  | 50.386  |
| Total |           | 15685934 | 100.000 |

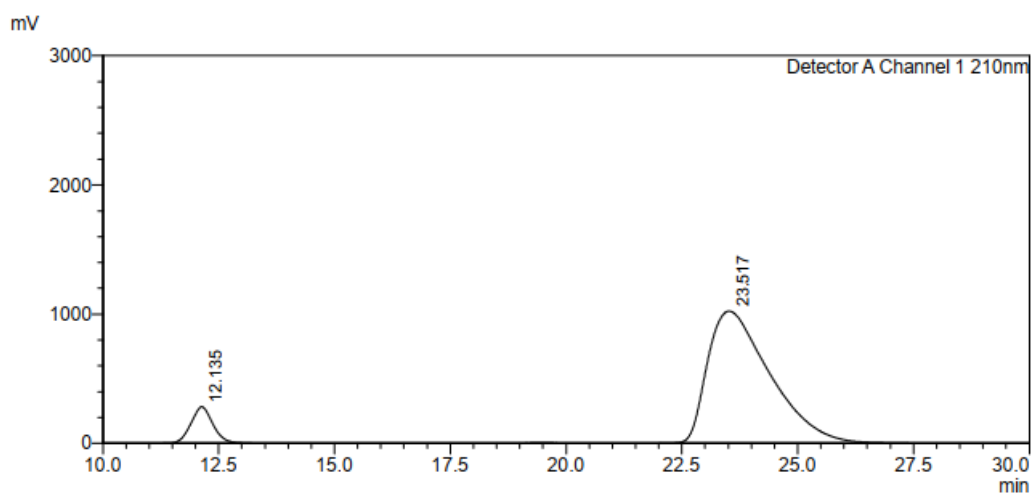

Detector A Channel 2 230nm

| Peak# | Ret. Time | Area    | Area%   |
|-------|-----------|---------|---------|
| 1     | 12.147    | 568539  | 9.242   |
| 2     | 23.516    | 5583045 | 90.758  |
| Total |           | 6151584 | 100.000 |

**(R)-N-(4-cyano-3-(trifluoromethyl)phenyl)-3-((4-fluorophenyl)sulfonyl)-2-hydroxy-2-methylpropanamide ((R)-Bicalutamide)**

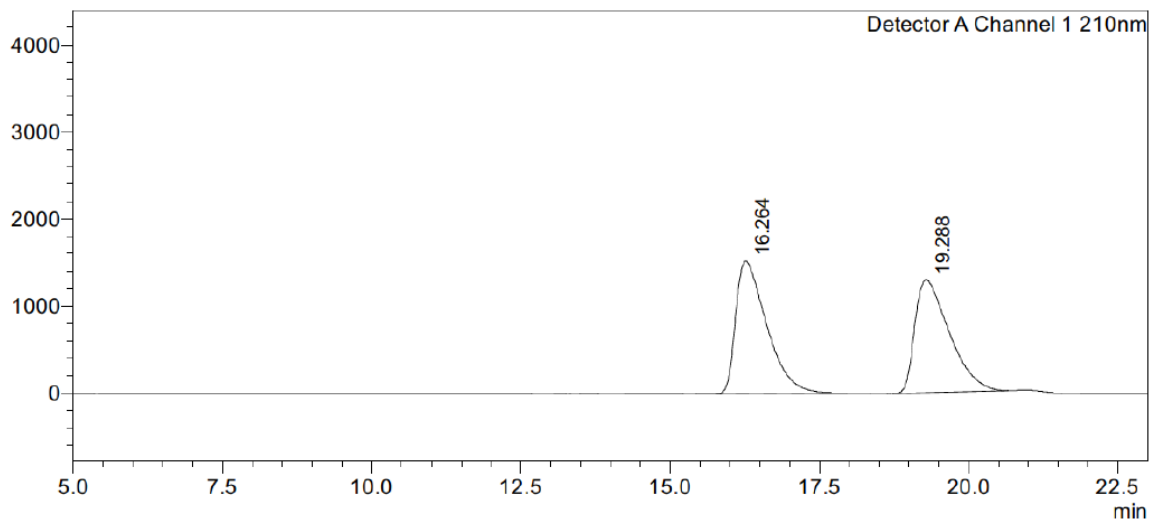

Detector A Channel 1 210nm

| Peak# | Ret. Time | Area      | Area%   |
|-------|-----------|-----------|---------|
| 1     | 16.264    | 55085883  | 51.343  |
| 2     | 19.288    | 52204192  | 48.657  |
| Total |           | 107290074 | 100.000 |

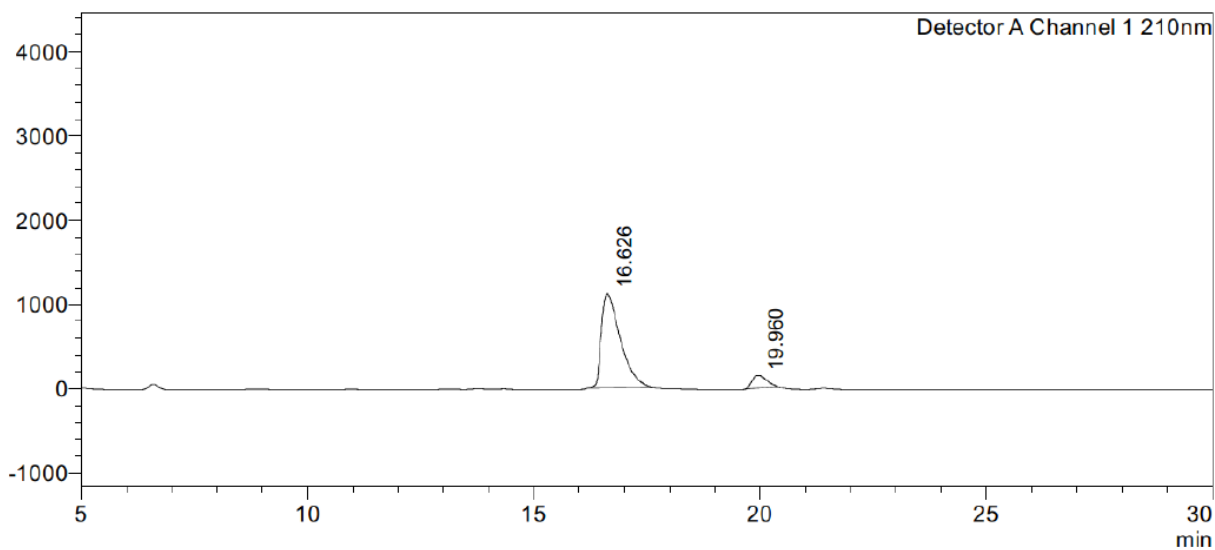

Detector A Channel 1 210nm

| Peak# | Ret. Time | Area     | Area%   |
|-------|-----------|----------|---------|
| 1     | 16.626    | 32658952 | 90.379  |
| 2     | 19.960    | 3476752  | 9.621   |
| Total |           | 36135704 | 100.000 |

## 14. References

- [1] X. Zhang, J. Ren, A. M. Tan, D. Tan, R. Lee, C. H. Tan *Science*. 2019, **363**, 400.
- [2] K D. Parghi, J R. Satam, R V. Jayaram. *Green Chem. Lett. Rev.* 2011, **4**, 143.
- [3] a) G X. Ortiz, Jr., B N. Hemric, and Q Wang *Org. Lett.* 2017, **19**, 1314; b) H O. House, L F. Lee *J. Org. Chem.* 1976, **41**, 863; c) S Pagoti, D Dutta, J. Dash *Adv. Synth. Catal.* 2013, **355**, 3532; d) G Cecere, C. M König, J. L Alleva, D. W. C MacMillan *J. Am. Chem. Soc.* 2013, **135**, 11521.
- [4] A. Porzelle, M. D. Woodrow, N. C. O. Tomkinson *Org. Lett.* 2010, **12**, 812.
- [5] I Nakamura, M Owada, T Jo, M Terada *Org. Lett.* 2017, **19**, 2194.
- [6]. a) I Colomer, R C Barcelos, K E. Christensen, T J. Donohoe *Org. Lett.* 2016, **18**, 5880; b) Y. Li, A. Studer *Angew. Chem. Int. Ed.* 2012, **51**, 8221.
- [7]. a) G. Pochetti, N. Mitro, A. Lavecchia, M. Crestani, F. Loiodice, *J. Med. Chem.* 2010, **53**, 4354; b) L. Porcelli, F. Gilardi, A. Laghezza, L. Piemontese, M. Crestani, F. Loiodice, *J. Med. Chem.* 2012, **55**, 37.
